# Supplementary material for: Short-term variation in pH in seawaters around coastal areas of Japan: characteristics and forcings
Source: Copernicus journal article supplement (doi:10.5194/bg-21-177-2024), 2024-01-14
Supplement: Supplementary file 1 [file bg-21-177-2024-supplement.zip]

Archive with 2 entries (2 files):
- bg-21-177-2024-supplement-title-page.pdf
- Supplement.xlsx
