# Supplementary material for: Short-term variation in pH in seawaters around coastal areas of Japan: characteristics and forcings
Source: Copernicus journal article supplement (doi:10.5194/bg-21-177-2024), 2024-01-14
Supplement: Supplementary file 1 [file bg-21-177-2024-supplement.zip › bg-21-177-2024-supplement-title-page.pdf]

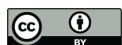

*Supplement of*

## **Short-term variation in pH in seawaters around coastal areas of Japan: characteristics and forcings**

**Tsuneo Ono et al.**

*Correspondence to:* Tsuneo Ono (tono@fra.affrc.go.jp)

- [bg-21-177-2024-supplement-title-page.pdf](#)
- [Supplement.xlsx](#)

The copyright of individual parts of the supplement might differ from the article licence.
