# Supplementary material for: Short-term variation in pH in seawaters around coastal areas of Japan: characteristics and forcings
Source: Copernicus journal article supplement (doi:10.5194/bg-21-177-2024), 2024-01-14
Supplement: Supplementary file 1 [file bg-21-177-2024-supplement.zip › Supplement.xlsx]

## Sheet: Sheet1
No	year	month	date	hour	Jurian date	year	water temp[deg C]_Miyako	salinity_Miyako	DO[umol/kg]_Miyako	pH_Miyako	Talk[umol/kg]_Miyako	DIC[umol/kg]_Miyako_calculated	fCO2_Miyako_calculated	Wara_Miyako_calculated	Wcal_Miyako_calculated	water temp[deg C]_Kashiwazaki	salinity_Kashiwazaki	DO[umol/kg]_Kashiwazaki	pH_Kashiwazaki	Talk[umol/kg]_Kashiwazaki	DIC[umol/kg]_Kashiwazaki_calculated	fCO2_Kashiwazaki_calculated	Wara_Kashiwazaki_calculated	Wcal_Kashiwazaki_calculated	water temp[deg C]_Shizukawa	salinity_Shizukawa	DO[umol/kg]_Shizukawa	pH_Shizukawa	Talk[umol/kg]_Shizukawa	DIC[umol/kg]_Shizukawa_calculated	fCO2_Shizukawa_calculated	Wara_Shizukawa_calculated	Wcal_Shizukawa_calculated	water temp[deg C]_Hinase	salinity_Hinase	DO[umol/kg]_Hinase	pH_Hinase	Talk[umol/kg]_Hinase	DIC[umol/kg]_Hinase_calculated	fCO2_Hinase_calculated	Wara_Hinase_calculated	Wcal_Hinase_calculated	water temp[deg C]_Ohno	salinity_Ohno	DO[umol/kg]_Ohno	pH_Ohno	Talk[umol/kg]_Ohno	DIC[umol/kg]_Ohno_calculated	fCO2_Ohno_calculated
1	2020	7	1	13	181.542	2020.5	14.0098	33.7658	323.669	8.07846	2252.49	2033.38	360.486	2.38401	3.72782
2	2020	7	1	14	181.583	2020.5	13.8921	33.767	323.673	8.07146	2252.57	2037.66	367.336	2.34288	3.6644
3	2020	7	1	15	181.625	2020.5	13.9453	33.6751	328.182	8.07227	2246.87	2032.11	365.849	2.3416	3.66264
4	2020	7	1	16	181.667	2020.5	14	33.634	323.639	8.07208	2244.32	2029.66	365.737	2.34107	3.66169
5	2020	7	1	17	181.708	2020.5	14.1061	33.61	323.276	8.07389	2242.83	2026.77	363.799	2.35543	3.68351
6	2020	7	1	18	181.75	2020.5	14.0357	33.6516	324.242	8.0747	2245.41	2029.06	363.303	2.35753	3.68704
7	2020	7	1	19	181.792	2020.5	14.1981	33.5924	329.291	8.07952	2241.74	2022.49	358.209	2.38662	3.73171
8	2020	7	1	20	181.833	2020.5	14.183	33.5161	324.773	8.07433	2237	2021.13	362.684	2.35413	3.68158
9	2020	7	1	21	181.875	2020.5	14.4199	33.5128	321.098	8.07514	2236.8	2018.83	361.915	2.37692	3.7154
10	2020	7	1	22	181.917	2020.5	14.5279	33.5358	315.257	8.07595	2238.23	2018.83	361.315	2.3919	3.7378
11	2020	7	1	23	181.958	2020.5	14.4594	33.5301	318.904	8.07376	2237.87	2020.09	363.402	2.37572	3.71308
12	2020	7	2	0	182	2020.5	14.4194	33.5444	317.908	8.07057	2238.76	2022.65	366.643	2.35949	3.68792
13	2020	7	2	1	182.042	2020.5	14.462	33.5806	315.647	8.06838	2241	2025.26	369.099	2.35681	3.68314
14	2020	7	2	2	182.083	2020.5	14.522	33.5835	314.492	8.06819	2241.18	2025.07	369.323	2.36117	3.68947
15	2020	7	2	3	182.125	2020.5	14.4864	33.6005	317.408	8.069	2242.24	2025.82	368.638	2.36364	3.69347
16	2020	7	2	4	182.167	2020.5	14.4191	33.5894	316.92	8.06281	2241.55	2028.68	374.735	2.32927	3.64036
17	2020	7	2	5	182.208	2020.5	14.3273	33.5238	301.182	8.04962	2237.48	2032.1	387.69	2.25735	3.52911
18	2020	7	2	6	182.25	2020.5	14.3626	33.4492	308.102	8.05244	2232.85	2026.64	384.19	2.26506	3.54142
19	2020	7	2	7	182.292	2020.5	14.446	33.4661	314.608	8.05525	2233.9	2025.62	381.463	2.28565	3.57288
20	2020	7	2	8	182.333	2020.5	14.469	33.4674	312.143	8.05606	2233.98	2025.14	380.65	2.29119	3.58135
21	2020	7	2	9	182.375	2020.5	14.498	33.4774	316.189	8.06287	2234.6	2022.25	373.828	2.32465	3.63335
22	2020	7	2	10	182.417	2020.5	14.5219	33.5152	316.229	8.06068	2236.95	2025.08	376.338	2.32065	3.62664
23	2020	7	2	11	182.458	2020.5	14.5734	33.6032	321.71	8.07093	2242.41	2024.4	366.762	2.3798	3.71803
24	2020	7	2	12	182.5	2020.5	14.513	33.6164	321.177	8.06218	2243.23	2029.7	375.604	2.3368	3.65122
25	2020	7	2	13	182.542	2020.5	14.501	33.6243	320.068	8.06144	2243.72	2030.55	376.421	2.33327	3.64574
26	2020	7	2	14	182.583	2020.5	14.3852	33.6714	318.773	8.05869	2246.64	2035.15	379.555	2.31637	3.61987
27	2020	7	2	15	182.625	2020.5	14.5511	33.6129	335.721	8.08194	2243.01	2019.75	356.076	2.42928	3.79543
28	2020	7	2	16	182.667	2020.5	14.5314	33.5851	337.354	8.08019	2241.28	2019.31	357.557	2.41669	3.77613
29	2020	7	2	17	182.708	2020.5	14.6693	33.5162	331.915	8.07944	2237.01	2015.08	357.793	2.41764	3.77702
30	2020	7	2	18	182.75	2020.5	14.9323	33.4608	331.884	8.07769	2233.57	2011.11	359.115	2.42588	3.78819
31	2020	7	2	19	182.792	2020.5	15.2468	33.5167	329.09	8.07495	2237.04	2012.99	362.252	2.44556	3.8159
32	2020	7	2	20	182.833	2020.5	15.2507	33.5422	324.248	8.0712	2238.62	2016.1	366.142	2.43123	3.79331
33	2020	7	2	21	182.875	2020.5	15.145	33.547	326.391	8.06945	2238.92	2017.98	367.9	2.41481	3.76853
34	2020	7	2	22	182.917	2020.5	14.936	33.5618	327.618	8.0707	2239.84	2019.69	366.738	2.40461	3.75419
35	2020	7	2	23	182.958	2020.5	14.846	33.5925	326.744	8.07295	2241.74	2020.85	364.729	2.41058	3.76401
36	2020	7	3	0	183	2020.5	14.8069	33.6091	327.984	8.07221	2242.77	2022.36	365.587	2.4056	3.75643
37	2020	7	3	1	183.042	2020.5	14.7755	33.5973	327.329	8.06646	2242.04	2024.75	371.211	2.37562	3.70995
38	2020	7	3	2	183.083	2020.5	14.8006	33.5396	323.691	8.06271	2238.46	2023.36	374.54	2.3549	3.6778
39	2020	7	3	3	183.125	2020.5	14.959	33.5088	321.668	8.06196	2236.55	2020.96	375.089	2.3614	3.68693
40	2020	7	3	4	183.167	2020.5	15.063	33.5122	320.214	8.06021	2236.76	2021.21	376.908	2.36242	3.68767
41	2020	7	3	5	183.208	2020.5	15.0119	33.4796	309.912	8.05147	2234.74	2024.03	385.622	2.31583	3.61558
42	2020	7	3	6	183.25	2020.5	14.95	33.4092	315.378	8.05472	2230.37	2019.28	381.689	2.31818	3.62026
43	2020	7	3	7	183.292	2020.5	14.9684	33.4312	313.736	8.05497	2231.74	2020.17	381.609	2.323	3.62748
44	2020	7	3	8	183.333	2020.5	14.9617	33.4644	318.444	8.05922	2233.8	2019.94	377.523	2.34479	3.66131
45	2020	7	3	9	183.375	2020.5	14.8855	33.4997	314.867	8.05647	2235.99	2023.63	380.589	2.32987	3.63834
46	2020	7	3	10	183.417	2020.5	14.8719	33.4983	316.268	8.06472	2235.9	2019.74	372.206	2.36562	3.6943
47	2020	7	3	11	183.458	2020.5	14.9866	33.5562	320.693	8.06798	2239.49	2020.34	369.415	2.3958	3.74007
48	2020	7	3	12	183.5	2020.5	14.8904	33.5703	327.646	8.06623	2240.37	2022.61	371.254	2.38132	3.71813
49	2020	7	3	13	183.542	2020.5	14.995	33.5039	329.34	8.06648	2236.25	2018.28	370.512	2.38431	3.72245
50	2020	7	3	14	183.583	2020.5	15.1077	33.4673	329.818	8.06973	2233.98	2013.99	367.01	2.40472	3.75368
51	2020	7	3	15	183.625	2020.5	15.2492	33.4667	334.855	8.07598	2233.94	2009.89	360.864	2.44531	3.81588
52	2020	7	3	16	183.667	2020.5	15.4251	33.4113	336.242	8.07824	2230.5	2004.62	358.273	2.46486	3.84533
53	2020	7	3	17	183.708	2020.5	15.6912	33.3395	329.054	8.07549	2226.05	2000.27	360.444	2.46709	3.84713
54	2020	7	3	18	183.75	2020.5	16.3732	33.3543	325.699	8.07574	2226.97	1995.77	360.328	2.52867	3.937
55	2020	7	3	19	183.792	2020.5	16.6532	33.3639	323.127	8.07499	2227.56	1994.51	361.13	2.55064	3.96858
56	2020	7	3	20	183.833	2020.5	16.6826	33.3915	319.507	8.06924	2229.27	1998.56	367.037	2.52877	3.93407
57	2020	7	3	21	183.875	2020.5	16.3536	33.3432	321.18	8.0725	2226.28	1996.96	363.443	2.51037	3.90878
58	2020	7	3	22	183.917	2020.5	16.0496	33.3784	322.396	8.07075	2228.46	2001.91	365.427	2.47973	3.86343
59	2020	7	3	23	183.958	2020.5	15.7848	33.4442	314.708	8.068	2232.54	2008.62	368.641	2.4513	3.8209
60	2020	7	4	0	184	2020.5	15.6154	33.4996	323.682	8.06825	2235.98	2012.61	368.793	2.44394	3.81042
61	2020	7	4	1	184.042	2020.5	15.5722	33.5106	318.416	8.0665	2236.66	2014.35	370.623	2.43336	3.7942
62	2020	7	4	2	184.083	2020.5	15.4286	33.593	318.45	8.06076	2241.77	2022.46	377.051	2.40345	3.74813
63	2020	7	4	3	184.125	2020.5	15.2637	33.6873	311.219	8.06101	2247.62	2028.44	377.503	2.40054	3.74426
64	2020	7	4	4	184.167	2020.5	15.292	33.6692	315.372	8.05826	2246.5	2028.61	380.177	2.38851	3.72538
65	2020	7	4	5	184.208	2020.5	15.2489	33.6897	312.734	8.05951	2247.77	2029.39	379.047	2.39273	3.73217
66	2020	7	4	6	184.25	2020.5	14.7461	33.8042	313.227	8.05276	2254.87	2042.25	386.81	2.33248	3.64134
67	2020	7	4	7	184.292	2020.5	14.5021	33.7786	313.148	8.04601	2253.29	2045.86	393.604	2.28041	3.56207
68	2020	7	4	8	184.333	2020.51	14.2756	33.782	309.997	8.04127	2253.5	2049.87	398.591	2.24211	3.50388
69	2020	7	4	9	184.375	2020.51	13.9795	33.8434	314.154	8.04352	2257.31	2054.15	396.595	2.23449	3.49372
70	2020	7	4	10	184.417	2020.51	13.9252	33.8011	314.053	8.04477	2254.68	2051.73	394.899	2.23157	3.48983
71	2020	7	4	11	184.458	2020.51	13.7907	33.8272	317.362	8.04602	2256.3	2053.48	393.743	2.22894	3.48651
72	2020	7	4	12	184.5	2020.51	13.8026	33.8184	320.123	8.05027	2255.76	2050.96	389.223	2.2474	3.51535
73	2020	7	4	13	184.542	2020.51	13.6189	33.8734	318.499	8.04353	2259.17	2058.27	396.69	2.20925	3.45662
74	2020	7	4	14	184.583	2020.51	13.5544	33.9131	320.424	8.04678	2261.63	2059.32	393.562	2.22194	3.47668
75	2020	7	4	15	184.625	2020.51	13.5129	33.9332	323.237	8.05003	2262.88	2059.16	390.304	2.23462	3.49668
76	2020	7	4	16	184.667	2020.51	13.4848	33.9418	322.103	8.04328	2263.41	2062.93	397.463	2.20429	3.44935
77	2020	7	4	17	184.708	2020.51	13.551	33.8383	322.39	8.04853	2256.99	2054.6	391.105	2.22208	3.47741
78	2020	7	4	18	184.75	2020.51	13.5399	33.8304	323.642	8.04779	2256.5	2054.61	391.818	2.21726	3.46998
79	2020	7	4	19	184.792	2020.51	13.4901	33.8579	322.176	8.04704	2258.21	2056.75	392.808	2.2128	3.46317
80	2020	7	4	20	184.833	2020.51	13.5001	33.8892	322.752	8.04829	2260.15	2057.75	391.757	2.22193	3.47718
81	2020	7	4	21	184.875	2020.51	13.4485	33.9032	318.816	8.04354	2261.02	2061.04	396.85	2.19894	3.44148
82	2020	7	4	22	184.917	2020.51	13.4215	33.8492	318.861	8.04279	2257.67	2058.73	397.18	2.18858	3.42581
83	2020	7	4	23	184.958	2020.51	13.4108	33.8643	318.63	8.04205	2258.6	2059.94	398.094	2.18601	3.42176
84	2020	7	5	0	185	2020.51	13.4189	33.8475	315.013	8.0363	2257.56	2061.62	404.099	2.16081	3.38236
85	2020	7	5	1	185.042	2020.51	13.451	33.8592	314.885	8.03655	2258.29	2061.9	403.943	2.1654	3.38926
86	2020	7	5	2	185.083	2020.51	13.5015	33.8538	314.915	8.0398	2257.95	2059.78	400.437	2.18249	3.41568
87	2020	7	5	3	185.125	2020.51	13.6771	33.7516	313.508	8.03905	2251.61	2053.5	400.454	2.18319	3.41624
88	2020	7	5	4	185.167	2020.51	13.764	33.6992	312.785	8.0363	2248.36	2051.39	402.994	2.17332	3.40052
89	2020	7	5	5	185.208	2020.51	13.7249	33.674	306.536	8.02656	2246.8	2054.73	413.347	2.12726	3.32889
90	2020	7	5	6	185.25	2020.51	13.7766	33.6574	308.852	8.02981	2245.77	2052.03	409.672	2.14313	3.35348
91	2020	7	5	7	185.292	2020.51	13.7761	33.6204	309.674	8.02906	2243.47	2050.42	410.167	2.13655	3.34342
92	2020	7	5	8	185.333	2020.51	13.7427	33.6081	308.52	8.02931	2242.71	2049.89	409.769	2.13393	3.33963
93	2020	7	5	9	185.375	2020.51	13.7949	33.5662	311.716	8.03456	2240.11	2044.95	403.75	2.15587	3.37388
94	2020	7	5	10	185.417	2020.51	13.7917	33.5998	313.748	8.03482	2242.2	2046.63	403.763	2.15983	3.37989
95	2020	7	5	11	185.458	2020.51	13.837	33.6042	318.17	8.04207	2242.47	2043.25	396.087	2.19433	3.43352
96	2020	7	5	12	185.5	2020.51	13.863	33.606	317.868	8.04232	2242.58	2043.05	395.845	2.19758	3.43841
97	2020	7	5	13	185.542	2020.51	13.9179	33.6153	317.585	8.04157	2243.16	2043.5	396.738	2.19953	3.44101
98	2020	7	5	14	185.583	2020.51	13.9722	33.6365	322.408	8.05082	2244.47	2039.97	387.237	2.24552	3.51241
99	2020	7	5	15	185.625	2020.51	13.994	33.671	323.478	8.05308	2246.61	2040.57	385.192	2.26037	3.53525
100	2020	7	5	16	185.667	2020.51	13.9533	33.6757	320.717	8.04633	2246.9	2044.23	392.238	2.22842	3.48554
101	2020	7	5	17	185.708	2020.51	13.974	33.6839	324.401	8.05358	2247.41	2041.16	384.77	2.26224	3.53823
102	2020	7	5	18	185.75	2020.51	14.0043	33.6773	324.282	8.05483	2247	2040.01	383.438	2.26946	3.54934
103	2020	7	5	19	185.792	2020.51	14.0214	33.6956	327.628	8.05908	2248.14	2038.85	379.239	2.29125	3.58318
104	2020	7	5	20	185.833	2020.51	13.9608	33.7304	326.074	8.05833	2250.3	2041.46	380.258	2.28655	3.57603
105	2020	7	5	21	185.875	2020.51	13.9263	33.7173	322.655	8.05159	2249.48	2044.17	387.082	2.25306	3.52399
106	2020	7	5	22	185.917	2020.51	13.8946	33.7219	324.282	8.05584	2249.77	2042.66	382.724	2.26951	3.54992
107	2020	7	5	23	185.958	2020.51	13.91	33.6879	324.474	8.05709	2247.66	2040.19	381.175	2.27287	3.55531
108	2020	7	6	0	186	2020.51	13.934	33.6831	323.974	8.05734	2247.36	2039.65	380.888	2.27541	3.55914
109	2020	7	6	1	186.042	2020.51	13.962	33.66	320.839	8.05359	2245.93	2039.98	384.558	2.25902	3.53345
110	2020	7	6	2	186.083	2020.51	13.9845	33.6362	321.043	8.05285	2244.45	2038.93	385.146	2.25523	3.52752
111	2020	7	6	3	186.125	2020.51	14.04	33.6704	324.325	8.0571	2246.57	2038.33	381.07	2.28154	3.56803
112	2020	7	6	4	186.167	2020.51	14.0226	33.6814	320.918	8.05235	2247.26	2041.25	386.036	2.26049	3.53516
113	2020	7	6	5	186.208	2020.51	14.0039	33.7021	322.972	8.0546	2248.54	2041.42	383.872	2.27085	3.55135
114	2020	7	6	6	186.25	2020.51	13.9569	33.7274	322.201	8.05385	2250.11	2043.43	384.83	2.26633	3.54445
115	2020	7	6	7	186.292	2020.51	13.93	33.6791	320.744	8.05111	2247.11	2042.37	387.274	2.24755	3.51561
116	2020	7	6	8	186.333	2020.51	13.9608	33.6522	322.451	8.05036	2245.45	2041.09	387.843	2.24413	3.51022
117	2020	7	6	9	186.375	2020.51	13.972	33.6321	320.961	8.05061	2244.2	2039.84	387.422	2.24415	3.51031
118	2020	7	6	10	186.417	2020.51	14.0239	33.6031	323.694	8.05086	2242.4	2037.83	386.945	2.24651	3.51382
119	2020	7	6	11	186.458	2020.51	14.0771	33.6104	326.723	8.05911	2242.85	2033.99	378.552	2.28743	3.57738
120	2020	7	6	12	186.5	2020.51	14.1379	33.5763	329.468	8.06137	2240.74	2030.72	376.02	2.29883	3.595
121	2020	7	6	13	186.542	2020.51	14.1727	33.5861	329.099	8.05962	2241.35	2031.8	377.877	2.29489	3.58851
122	2020	7	6	14	186.583	2020.51	14.2449	33.6102	328.28	8.05987	2242.84	2032.42	377.832	2.30419	3.60234
123	2020	7	6	15	186.625	2020.51	14.2057	33.6598	331.552	8.06512	2245.92	2032.8	372.907	2.32929	3.64153
124	2020	7	6	16	186.667	2020.51	14.1189	33.6854	330.885	8.06137	2247.51	2036.54	376.862	2.30818	3.60899
125	2020	7	6	17	186.708	2020.51	14.113	33.6808	329.651	8.05962	2247.22	2037.17	378.598	2.29952	3.59553
126	2020	7	6	18	186.75	2020.51	14.128	33.6207	332.134	8.06588	2243.49	2030.98	371.827	2.32244	3.63168
127	2020	7	6	19	186.792	2020.51	14.1568	33.5905	331.488	8.06413	2241.62	2030.02	373.352	2.31399	3.61846
128	2020	7	6	20	186.833	2020.51	14.3891	33.5813	333.408	8.07338	2241.05	2023.45	364.145	2.37345	3.7097
129	2020	7	6	21	186.875	2020.51	14.3424	33.5852	329.279	8.06463	2241.29	2028.16	372.853	2.33072	3.64326
130	2020	7	6	22	186.917	2020.51	14.2917	33.5059	328.179	8.06188	2236.37	2025.69	374.988	2.30647	3.6063
131	2020	7	6	23	186.958	2020.51	14.3023	33.4937	328.59	8.06314	2235.61	2024.39	373.636	2.31165	3.6144
132	2020	7	7	0	187	2020.51	14.3959	33.4631	326.701	8.06139	2233.72	2022.94	375.182	2.30839	3.60882
133	2020	7	7	1	187.042	2020.51	14.4339	33.5081	328.194	8.06264	2236.51	2024.42	374.28	2.32153	3.62874
134	2020	7	7	2	187.083	2020.51	14.3689	33.5414	326.65	8.06189	2238.57	2026.98	375.278	2.31628	3.6208
135	2020	7	7	3	187.125	2020.51	14.3564	33.6368	327.917	8.06314	2244.49	2031.45	374.755	2.3304	3.64228
136	2020	7	7	4	187.167	2020.51	14.2216	33.6874	326.144	8.0594	2247.63	2036.83	378.914	2.3079	3.60777
137	2020	7	7	5	187.208	2020.51	14.1544	33.7132	322.697	8.05265	2249.23	2041.83	386.028	2.27536	3.55722
138	2020	7	7	6	187.25	2020.51	14.1568	33.7062	325.854	8.0609	2248.8	2037.57	377.515	2.31121	3.61329
139	2020	7	7	7	187.292	2020.51	14.1402	33.6896	327.28	8.06215	2247.77	2036.24	376.113	2.31376	3.61753
140	2020	7	7	8	187.333	2020.51	14.1822	33.6856	328.048	8.0634	2247.52	2035.13	374.829	2.32232	3.63062
141	2020	7	7	9	187.375	2020.51	14.1699	33.6867	326.128	8.05966	2247.59	2037.05	378.63	2.30481	3.60334
142	2020	7	7	10	187.417	2020.51	14.154	33.6498	328.176	8.06291	2245.3	2033.71	375.042	2.31426	3.61849
143	2020	7	7	11	187.458	2020.51	14.2309	33.5738	329.706	8.06516	2240.58	2028.13	372.209	2.32288	3.63192
144	2020	7	7	12	187.5	2020.51	14.3136	33.5169	331.991	8.06741	2237.05	2023.5	369.543	2.3339	3.64893
145	2020	7	7	13	187.542	2020.51	14.4912	33.5546	331.948	8.07066	2239.39	2022.61	366.643	2.36684	3.69878
146	2020	7	7	14	187.583	2020.51	14.4906	33.4192	336.15	8.07491	2230.99	2013.56	361.444	2.37213	3.70807
147	2020	7	7	15	187.625	2020.51	14.729	33.2702	334.426	8.07517	2221.75	2003.98	360.128	2.37758	3.71583
148	2020	7	7	16	187.667	2020.51	14.753	33.2193	336.239	8.07742	2218.59	2000.09	357.57	2.38448	3.72683
149	2020	7	7	17	187.708	2020.51	14.8826	33.2044	334.362	8.07467	2217.67	1999.68	360.145	2.38121	3.7208
150	2020	7	7	18	187.75	2020.51	15.103	33.2725	333.484	8.08092	2221.89	1998.57	354.629	2.43532	3.803
151	2020	7	7	19	187.792	2020.51	15.0536	33.349	334.977	8.08017	2226.64	2003.24	355.904	2.43577	3.80352
152	2020	7	7	20	187.833	2020.51	14.9676	33.4337	331.537	8.07443	2231.89	2011.03	362.109	2.411	3.76488
153	2020	7	7	21	187.875	2020.51	14.9696	33.4745	332.616	8.07768	2234.42	2011.55	359.238	2.43037	3.79479
154	2020	7	7	22	187.917	2020.51	14.9719	33.4664	330.824	8.07593	2233.92	2011.96	360.882	2.42167	3.78125
155	2020	7	7	23	187.958	2020.51	15.114	33.3463	327.332	8.07218	2226.47	2006.51	363.678	2.40386	3.75322
156	2020	7	8	0	188	2020.52	15.2105	33.2437	327.594	8.07243	2220.11	2000.38	362.674	2.40236	3.75089
157	2020	7	8	1	188.042	2020.52	15.392	33.2339	323.91	8.07369	2219.5	1997.93	361.396	2.42225	3.78053
158	2020	7	8	2	188.083	2020.52	15.4024	33.2859	324.133	8.07394	2222.72	2000.41	361.538	2.42976	3.79174
159	2020	7	8	3	188.125	2020.52	15.2847	33.3713	324.958	8.07219	2228.02	2006.54	363.881	2.42079	3.77805
160	2020	7	8	4	188.167	2020.52	15.3049	33.4219	321.838	8.06944	2231.16	2010.33	366.984	2.41515	3.76869
161	2020	7	8	5	188.208	2020.52	14.981	33.5631	319.721	8.06169	2239.92	2023.75	375.788	2.36753	3.69593
162	2020	7	8	6	188.25	2020.52	14.8039	33.619	320.263	8.05994	2243.39	2028.78	377.963	2.35078	3.67078
163	2020	7	8	7	188.292	2020.52	14.6736	33.6789	321.549	8.0632	2247.1	2031.29	375.102	2.3608	3.687
164	2020	7	8	8	188.333	2020.52	14.4991	33.6985	324.59	8.06645	2248.32	2032.04	371.942	2.36311	3.69185
165	2020	7	8	9	188.375	2020.52	14.6137	33.6729	321.332	8.0617	2246.73	2032.13	376.558	2.34855	3.66838
166	2020	7	8	10	188.417	2020.52	14.6229	33.5455	324.151	8.06695	2238.83	2022.94	370.288	2.36001	3.68714
167	2020	7	8	11	188.458	2020.52	15.2303	33.4318	321.604	8.0672	2231.77	2012.47	369.275	2.39971	3.74514
168	2020	7	8	12	188.5	2020.52	15.2117	33.3197	322.21	8.07028	2224.82	2005.33	365.369	2.40055	3.74746
169	2020	7	8	13	188.542	2020.52	15.3459	33.2609	321.689	8.07135	2221.17	2000.79	363.885	2.41053	3.76239
170	2020	7	8	14	188.583	2020.52	15.6369	33.3032	320.107	8.07343	2223.8	1999.81	362.192	2.44903	3.81971
171	2020	7	8	15	188.625	2020.52	15.7368	33.3294	322.332	8.0785	2225.42	1997.94	357.436	2.48399	3.87317
172	2020	7	8	16	188.667	2020.52	15.5851	33.3654	324.986	8.07757	2227.66	2001.38	358.593	2.47052	3.85318
173	2020	7	8	17	188.708	2020.52	15.5549	33.4338	320.717	8.07265	2231.9	2007.53	363.928	2.45227	3.82443
174	2020	7	8	18	188.75	2020.52	15.6443	33.5178	323.572	8.07872	2237.11	2008.21	358.599	2.49725	3.89314
175	2020	7	8	19	188.792	2020.52	15.5351	33.527	323.127	8.07479	2237.68	2011.43	362.505	2.47044	3.85221
176	2020	7	8	20	188.833	2020.52	15.613	33.5149	320.86	8.07287	2236.93	2011.17	364.321	2.46681	3.84598
177	2020	7	8	21	188.875	2020.52	15.6087	33.3626	321.043	8.07094	2227.48	2004.29	365.084	2.44141	3.8076
178	2020	7	8	22	188.917	2020.52	15.7425	33.3654	318.925	8.07501	2227.66	2001.45	361.103	2.47202	3.85417
179	2020	7	8	23	188.958	2020.52	15.5872	33.4319	320.568	8.07209	2231.78	2007.47	364.467	2.45222	3.82409
180	2020	7	9	0	189	2020.52	15.486	33.4629	319.946	8.06816	2233.7	2011.73	368.591	2.42875	3.7881
181	2020	7	9	1	189.042	2020.52	15.4775	33.4874	318.026	8.06624	2235.22	2013.99	370.703	2.42173	3.77704
182	2020	7	9	2	189.083	2020.52	15.3873	33.5403	316.5	8.06231	2238.5	2019.29	375.058	2.40166	3.74608
183	2020	7	9	3	189.125	2020.52	15.2709	33.5874	316.765	8.06138	2241.43	2023.03	376.345	2.3926	3.73254
184	2020	7	9	4	189.167	2020.52	15.2255	33.5977	314.778	8.05546	2242.07	2026.73	382.484	2.36302	3.68669
185	2020	7	9	5	189.208	2020.52	15.2386	33.6218	315.982	8.05953	2243.56	2025.94	378.496	2.38501	3.72071
186	2020	7	9	6	189.25	2020.52	15.1699	33.6522	316.146	8.0596	2245.45	2027.98	378.646	2.38275	3.71752
187	2020	7	9	7	189.292	2020.52	15.2219	33.6265	316.265	8.05968	2243.85	2026.23	378.378	2.38477	3.72044
188	2020	7	9	8	189.333	2020.52	15.1859	33.6369	315.747	8.05775	2244.5	2027.96	380.425	2.37412	3.70403
189	2020	7	9	9	189.375	2020.52	15.1472	33.6634	314.519	8.05482	2246.14	2031.02	383.642	2.36039	3.68273
190	2020	7	9	10	189.417	2020.52	15.0195	33.6711	318.346	8.0569	2246.62	2031.36	381.538	2.36002	3.68312
191	2020	7	9	11	189.458	2020.52	14.8202	33.7233	318.514	8.05297	2249.86	2037.4	385.964	2.33136	3.63958
192	2020	7	9	12	189.5	2020.52	14.8201	33.6116	321.473	8.05704	2242.93	2029.65	380.872	2.33836	3.6513
193	2020	7	9	13	189.542	2020.52	15.205	33.4837	315.494	8.05112	2234.99	2023.01	386.061	2.33036	3.63673
194	2020	7	9	14	189.583	2020.52	15.5179	33.5464	318.301	8.06019	2238.88	2019.66	377.277	2.40352	3.74786
195	2020	7	9	15	189.625	2020.52	15.5736	33.5899	321.122	8.06427	2241.58	2019.52	373.485	2.43142	3.79056
196	2020	7	9	16	189.667	2020.52	15.5632	33.5725	320.086	8.06134	2240.5	2020.12	376.317	2.41527	3.7656
197	2020	7	9	17	189.708	2020.52	15.539	33.5208	320.117	8.06141	2237.3	2017.59	375.838	2.40822	3.75521
198	2020	7	9	18	189.75	2020.52	15.5817	33.5358	325.428	8.06949	2238.23	2014.13	367.832	2.45061	3.82083
199	2020	7	9	19	189.792	2020.52	15.5779	33.5404	322.722	8.06656	2238.51	2015.82	370.795	2.43721	3.79994
200	2020	7	9	20	189.833	2020.52	15.7753	33.4626	321.463	8.06563	2233.69	2010.79	371.152	2.44147	3.8055
201	2020	7	9	21	189.875	2020.52	16.0253	33.4509	317.222	8.06171	2232.96	2010.23	375.056	2.44322	3.8062
202	2020	7	9	22	189.917	2020.52	16.3193	33.5338	316.143	8.06378	2238.1	2011.3	373.609	2.48674	3.87078
203	2020	7	9	23	189.958	2020.52	16.4222	33.5795	312.347	8.06285	2240.94	2013.33	374.905	2.4961	3.88409
204	2020	7	10	0	190	2020.52	16.2766	33.5694	314.419	8.06593	2240.31	2012.39	371.705	2.49696	3.88679
205	2020	7	10	1	190.042	2020.52	16.2098	33.5558	312.28	8.059	2239.47	2015.59	378.647	2.45734	3.8258
206	2020	7	10	2	190.083	2020.52	16.0708	33.5562	316.122	8.06308	2239.49	2014.66	374.481	2.46452	3.83818
207	2020	7	10	3	190.125	2020.52	16.0889	33.5741	315.375	8.06315	2240.6	2015.41	374.545	2.4683	3.84377
208	2020	7	10	4	190.167	2020.52	15.9119	33.582	313.246	8.05622	2241.09	2020.51	381.682	2.42201	3.77311
209	2020	7	10	5	190.208	2020.52	15.8425	33.6008	312.13	8.0553	2242.26	2022.44	382.779	2.41386	3.76087
210	2020	7	10	6	190.25	2020.52	15.7722	33.6004	313.346	8.05637	2242.23	2022.42	381.656	2.41286	3.7599
211	2020	7	10	7	190.292	2020.52	15.878	33.5949	311.841	8.05644	2241.89	2021.32	381.551	2.42151	3.77253
212	2020	7	10	8	190.333	2020.52	15.887	33.5739	311.42	8.05552	2240.59	2020.61	382.344	2.41583	3.76376
213	2020	7	10	9	190.375	2020.52	15.7761	33.4728	306.862	8.04659	2234.32	2020.46	390.833	2.35567	3.67169
214	2020	7	10	10	190.417	2020.52	15.8147	33.4266	306.624	8.04566	2231.45	2018.22	391.442	2.34999	3.66286
215	2020	7	10	11	190.458	2020.52	15.9896	33.4438	309.943	8.05174	2232.52	2014.94	385.248	2.39368	3.72937
216	2020	7	10	12	190.5	2020.52	16.0595	33.4178	312.389	8.05281	2230.91	2012.57	383.936	2.40172	3.74152
217	2020	7	10	13	190.542	2020.52	16.1663	33.4097	307.91	8.04989	2230.4	2012.77	386.935	2.39644	3.73245
218	2020	7	10	14	190.583	2020.52	16.3204	33.4142	313.23	8.05896	2230.68	2007.49	377.601	2.45165	3.81707
219	2020	7	10	15	190.625	2020.52	16.4805	33.5104	315.138	8.06603	2236.65	2007.77	371.158	2.50877	3.90382
220	2020	7	10	16	190.667	2020.52	16.3601	33.4523	312.923	8.05911	2233.05	2009.08	377.749	2.45973	3.82901
221	2020	7	10	17	190.708	2020.52	16.4119	33.4205	311.832	8.05818	2231.07	2007.51	378.455	2.45648	3.82374
222	2020	7	10	18	190.75	2020.52	16.4699	33.4628	313.971	8.06125	2233.7	2007.76	375.642	2.48027	3.85994
223	2020	7	10	19	190.792	2020.52	16.3508	33.5586	315.811	8.06433	2239.64	2012.07	373.246	2.49466	3.88264
224	2020	7	10	20	190.833	2020.52	16.4409	33.5238	315.104	8.0644	2237.48	2009.57	372.909	2.49907	3.88898
225	2020	7	10	21	190.875	2020.52	16.27	33.4329	307.362	8.05147	2231.84	2012.45	385.474	2.41479	3.75998
226	2020	7	10	22	190.917	2020.52	16.3037	33.4651	307.797	8.05255	2233.84	2013.35	384.616	2.42591	3.77675
227	2020	7	10	23	190.958	2020.52	16.2547	33.5041	310.774	8.05462	2236.26	2014.72	382.764	2.43542	3.79167
228	2020	7	11	0	191	2020.52	16.2035	33.5049	309.836	8.0547	2236.31	2015.1	382.689	2.43151	3.78603
229	2020	7	11	1	191.042	2020.52	16.1712	33.4754	302.2	8.04277	2234.48	2019.54	394.976	2.37126	3.6927
230	2020	7	11	2	191.083	2020.52	16.1309	33.549	309.598	8.05384	2239.04	2018.33	383.913	2.42605	3.7778
231	2020	7	11	3	191.125	2020.52	16.3429	33.5093	308.325	8.05592	2236.58	2013.71	381.474	2.44943	3.81268
232	2020	7	11	4	191.167	2020.52	16.238	33.419	301.648	8.04599	2230.98	2014.59	391.113	2.38563	3.71494
233	2020	7	11	5	191.208	2020.52	16.3844	33.4012	300.07	8.04606	2229.88	2012.57	390.913	2.39632	3.73049
234	2020	7	11	6	191.25	2020.52	16.2464	33.4961	299.022	8.03814	2235.76	2022.28	400.124	2.35866	3.67229
235	2020	7	11	7	191.292	2020.52	15.975	33.6011	305.524	8.04221	2242.28	2027.77	396.564	2.36532	3.68414
236	2020	7	11	8	191.333	2020.52	15.9321	33.5628	304.817	8.04528	2239.9	2024.62	392.973	2.37179	3.69485
237	2020	7	11	9	191.375	2020.52	15.8389	33.6159	302.042	8.04336	2243.19	2028.98	395.435	2.36078	3.67809
238	2020	7	11	10	191.417	2020.52	15.6979	33.6614	304.881	8.04343	2246.02	2032.33	395.7	2.35411	3.66852
239	2020	7	11	11	191.458	2020.52	15.6181	33.6765	306.301	8.0465	2246.95	2032.23	392.544	2.36293	3.6828
240	2020	7	11	12	191.5	2020.52	16.0716	33.4243	301.377	8.04258	2231.31	2017.7	394.743	2.35698	3.67167
241	2020	7	11	13	191.542	2020.52	16.3247	33.249	298.242	8.04665	2220.44	2004.83	389.058	2.37833	3.70415
242	2020	7	11	14	191.583	2020.52	16.5058	33.1684	306.417	8.06373	2215.44	1991.13	370.884	2.46354	3.83593
243	2020	7	11	15	191.625	2020.53	16.4379	33.1348	307.374	8.0638	2213.35	1989.86	370.55	2.45451	3.82274
244	2020	7	11	16	191.667	2020.53	16.4118	33.2031	308.739	8.06287	2217.59	1994.03	372.003	2.45526	3.82358
245	2020	7	11	17	191.708	2020.53	16.3653	33.2409	304.586	8.05595	2219.93	1999.67	379.344	2.4233	3.77391
246	2020	7	11	18	191.75	2020.53	16.3103	33.3277	306.828	8.05602	2225.32	2004.52	379.942	2.42811	3.78118
247	2020	7	11	19	191.792	2020.53	16.3179	33.3532	308.081	8.05809	2226.9	2004.78	378.012	2.44101	3.801
248	2020	7	11	20	191.833	2020.53	16.3082	33.3554	305.896	8.05617	2227.04	2005.89	380.006	2.43152	3.78629
249	2020	7	11	21	191.875	2020.53	16.256	33.2927	301.164	8.04924	2223.15	2006.36	386.686	2.38889	3.72083
250	2020	7	11	22	191.917	2020.53	16.3049	33.2158	300.335	8.04931	2218.38	2001.99	386.002	2.38533	3.71548
251	2020	7	11	23	191.958	2020.53	16.392	33.0689	297.373	8.04739	2209.26	1994.66	386.851	2.36863	3.68989
252	2020	7	12	0	192	2020.53	16.4238	32.9584	295.18	8.04646	2202.41	1989.14	386.938	2.35566	3.67031
253	2020	7	12	1	192.042	2020.53	16.4607	32.9098	293.065	8.04454	2199.39	1987.26	388.568	2.34505	3.65385
254	2020	7	12	2	192.083	2020.53	16.4815	32.9045	290.231	8.04361	2199.07	1987.27	389.502	2.34206	3.64907
255	2020	7	12	3	192.125	2020.53	16.5952	32.9569	296.072	8.05268	2202.32	1984.87	380.498	2.39785	3.73458
256	2020	7	12	4	192.167	2020.53	16.6238	33.0628	299.086	8.05476	2208.89	1989.15	379.199	2.42086	3.76932
257	2020	7	12	5	192.208	2020.53	16.5578	33.1236	295.429	8.04683	2212.66	1996.56	387.897	2.38552	3.71436
258	2020	7	12	6	192.25	2020.53	16.6738	33.0673	298.854	8.0549	2209.16	1988.94	379.087	2.42623	3.77719
259	2020	7	12	7	192.292	2020.53	16.6304	32.8784	294.317	8.04998	2197.45	1981.84	382.675	2.38027	3.70755
260	2020	7	12	8	192.333	2020.53	16.666	32.6411	292.093	8.04405	2182.73	1972.08	386.945	2.33194	3.63391
261	2020	7	12	9	192.375	2020.53	16.7	32.5201	286.873	8.04612	2175.22	1964.59	383.824	2.33139	3.63379
262	2020	7	12	10	192.417	2020.53	16.7017	32.328	285.895	8.0442	2163.31	1955.5	384.283	2.30309	3.59131
263	2020	7	12	11	192.458	2020.53	16.7284	32.2651	284.314	8.04327	2159.4	1952.47	384.742	2.29468	3.57851
264	2020	7	12	12	192.5	2020.53	16.73	32.1703	282.227	8.03735	2153.52	1950.23	390.157	2.25926	3.52407
265	2020	7	12	13	192.542	2020.53	16.7333	32.1337	285.886	8.03742	2151.25	1948.27	389.782	2.2561	3.51943
266	2020	7	12	14	192.583	2020.53	16.7177	32.1297	282.766	8.02749	2151.01	1952.64	400.276	2.21191	3.45066
267	2020	7	12	15	192.625	2020.53	16.711	32.094	279.688	8.03157	2148.79	1949	395.625	2.22515	3.47167
268	2020	7	12	16	192.667	2020.53	16.7135	32.1747	280.776	8.03364	2153.8	1952.26	394.096	2.24241	3.49789
269	2020	7	12	17	192.708	2020.53	16.7657	32.3184	283.653	8.03871	2162.71	1957.07	389.937	2.28323	3.55989
270	2020	7	12	18	192.75	2020.53	16.7287	32.4476	282.732	8.03579	2170.72	1965.4	394.077	2.2807	3.55516
271	2020	7	12	19	192.792	2020.53	16.7459	32.2107	278.774	8.03186	2156.03	1954.72	396.292	2.24097	3.49507
272	2020	7	12	20	192.833	2020.53	16.8009	32.0284	283.744	8.04493	2144.72	1938.9	381.144	2.28328	3.5622
273	2020	7	12	21	192.875	2020.53	16.758	31.9452	278.579	8.03701	2139.56	1938.46	388.676	2.23703	3.49112
274	2020	7	12	22	192.917	2020.53	16.7811	31.8315	280.231	8.04208	2132.51	1930.09	382.497	2.24899	3.51061
275	2020	7	12	23	192.958	2020.53	16.7822	31.8651	283.113	8.04315	2134.59	1931.35	381.663	2.25717	3.52307
276	2020	7	13	0	193	2020.53	16.8	31.8832	284.238	8.04623	2135.71	1930.77	378.663	2.27377	3.54867
277	2020	7	13	1	193.042	2020.53	16.7739	31.8522	277.683	8.0373	2133.79	1933.37	387.613	2.23004	3.48092
278	2020	7	13	2	193.083	2020.53	16.765	31.6448	278.997	8.03838	2120.93	1922.13	384.808	2.21274	3.45582
279	2020	7	13	3	193.125	2020.53	16.8033	31.9097	282.425	8.04445	2137.36	1932.94	380.694	2.26906	3.54106
280	2020	7	13	4	193.167	2020.53	16.7726	32.1219	279.996	8.03852	2150.52	1946.88	388.537	2.26279	3.52966
281	2020	7	13	5	193.208	2020.53	16.7228	32.1854	274.646	8.0286	2154.46	1955.03	399.561	2.22261	3.46684
282	2020	7	13	6	193.25	2020.53	16.3265	32.7387	282.266	8.03567	2188.78	1983.43	396.514	2.27754	3.55111
283	2020	7	13	7	193.292	2020.53	16.0547	33.0294	285.572	8.03574	2206.81	2000.47	398.781	2.28536	3.56318
284	2020	7	13	8	193.333	2020.53	16.0133	33.0706	285.188	8.03382	2209.37	2003.8	401.184	2.27773	3.55131
285	2020	7	13	9	193.375	2020.53	16.5627	31.5789	276.264	8.03089	2116.84	1923.35	392.011	2.15898	3.37401
286	2020	7	13	10	193.417	2020.53	16.544	31.1763	273.957	8.03096	2091.87	1902.34	388.584	2.11762	3.3131
287	2020	7	13	11	193.458	2020.53	16.522	31.0291	281.584	8.03704	2082.74	1892.15	381.109	2.12605	3.32782
288	2020	7	13	12	193.5	2020.53	16.5154	31.3286	287.559	8.04011	2101.31	1906.53	380.399	2.16851	3.39153
289	2020	7	13	13	193.542	2020.53	16.4937	31.3995	279.036	8.02819	2105.71	1915.58	393.335	2.12467	3.32249
290	2020	7	13	14	193.583	2020.53	16.4691	31.6016	279.99	8.02926	2118.25	1925.88	393.889	2.14733	3.35631
291	2020	7	13	15	193.625	2020.53	16.46	32.0622	288.333	8.04133	2146.82	1944.65	385.059	2.24402	3.50339
292	2020	7	13	16	193.667	2020.53	16.4482	32.2335	285.146	8.04041	2157.44	1954.08	387.408	2.25656	3.52158
293	2020	7	13	17	193.708	2020.53	16.445	32.4284	290.466	8.04648	2169.53	1961.46	382.68	2.30277	3.59205
294	2020	7	13	18	193.75	2020.53	16.3934	32.7917	286.831	8.04655	2192.07	1980.66	385.501	2.33637	3.64185
295	2020	7	13	19	193.792	2020.53	16.3362	32.8789	295.661	8.04963	2197.48	1984.15	383	2.35444	3.66978
296	2020	7	13	20	193.833	2020.53	16.2092	33.0023	296.74	8.0507	2205.13	1990.96	382.85	2.36159	3.68097
297	2020	7	13	21	193.875	2020.53	16.1168	33.0875	291.474	8.04177	2210.42	2000.24	392.853	2.32285	3.62068
298	2020	7	13	22	193.917	2020.53	16.1233	33.0933	296.24	8.04685	2210.78	1998.12	387.567	2.3466	3.65761
299	2020	7	13	23	193.958	2020.53	16.3693	32.3836	293.309	8.04892	2166.75	1958.54	379.801	2.30277	3.59305
300	2020	7	14	0	194	2020.53	16.4541	32.0921	292.264	8.052	2148.67	1941.39	374.394	2.29287	3.57945
301	2020	7	14	1	194.042	2020.53	16.434	31.9881	286.77	8.04407	2142.22	1939.73	381.636	2.24616	3.50758
302	2020	7	14	2	194.083	2020.53	16.4348	32.0325	290.246	8.04714	2144.98	1940.65	378.845	2.26404	3.53512
303	2020	7	14	3	194.125	2020.53	16.4203	32.2565	290.95	8.04722	2158.87	1952.36	380.548	2.28628	3.568
304	2020	7	14	4	194.167	2020.53	16.3849	32.4241	288.302	8.04029	2169.27	1964.51	389.065	2.27043	3.54213
305	2020	7	14	5	194.208	2020.53	16.363	32.4845	285.133	8.03836	2173.01	1968.69	391.576	2.26646	3.5356
306	2020	7	14	6	194.25	2020.53	16.1256	32.9457	281.565	8.03144	2201.62	1997.59	402.735	2.26384	3.52972
307	2020	7	14	7	194.292	2020.53	15.8568	33.2403	291.386	8.02951	2219.9	2015.76	407.244	2.26331	3.52879
308	2020	7	14	8	194.333	2020.53	15.7374	33.338	292.27	8.03958	2225.96	2017.02	397.152	2.30766	3.59816
309	2020	7	14	9	194.375	2020.53	15.5771	33.4779	300.046	8.04466	2234.63	2023.08	392.872	2.33125	3.63518
310	2020	7	14	10	194.417	2020.53	15.5313	33.5069	306.557	8.04773	2236.43	2023.46	389.859	2.34418	3.6555
311	2020	7	14	11	194.458	2020.53	15.4913	33.5534	306.847	8.04981	2239.32	2025.19	388.053	2.35491	3.67223
312	2020	7	14	12	194.5	2020.53	15.4509	33.6004	303.461	8.04188	2242.23	2031.68	396.797	2.32088	3.61914
313	2020	7	14	13	194.542	2020.53	15.4159	33.6234	307.913	8.04595	2243.66	2031.2	392.652	2.33852	3.64675
314	2020	7	14	14	194.583	2020.53	15.7089	33.2428	299.598	8.04803	2220.05	2008.31	387.458	2.33325	3.639
315	2020	7	14	15	194.625	2020.53	15.4502	33.5224	302.221	8.0491	2237.39	2024.21	388.532	2.34524	3.6577
316	2020	7	14	16	194.667	2020.53	15.4475	33.5614	298.422	8.04617	2239.81	2027.64	391.922	2.33585	3.64279
317	2020	7	14	17	194.708	2020.53	15.4017	33.5629	295.466	8.04625	2239.91	2028.02	391.846	2.3326	3.63807
318	2020	7	14	18	194.75	2020.53	15.5252	33.4849	302.493	8.05532	2235.07	2018.75	381.788	2.37563	3.70477
319	2020	7	14	19	194.792	2020.53	15.641	33.4343	300.094	8.05439	2231.93	2015.73	382.365	2.37583	3.70451
320	2020	7	14	20	194.833	2020.53	15.6005	33.4904	299.506	8.05247	2235.41	2019.85	384.796	2.36951	3.69456
321	2020	7	14	21	194.875	2020.53	15.5829	33.505	301.786	8.04854	2236.32	2022.61	389.005	2.35185	3.66706
322	2020	7	14	22	194.917	2020.53	15.6306	33.3838	296.621	8.04661	2228.8	2016.87	390.057	2.33485	3.64107
323	2020	7	14	23	194.958	2020.53	15.8313	33.3	298.687	8.05269	2223.6	2008.19	383.095	2.37006	3.69498
324	2020	7	15	0	195	2020.53	15.804	33.3272	294.832	8.04776	2225.29	2012.14	388.433	2.34842	3.66125
325	2020	7	15	1	195.042	2020.53	15.801	33.3482	293.65	8.04884	2226.59	2012.74	387.478	2.35514	3.67159
326	2020	7	15	2	195.083	2020.53	15.762	33.1984	297.7	8.05091	2217.3	2004.26	384.116	2.34595	3.65872
327	2020	7	15	3	195.125	2020.53	15.8263	33.0593	291.858	8.04598	2208.67	1998.88	388.138	2.31508	3.61114
328	2020	7	15	4	195.167	2020.53	15.9065	32.9515	289.21	8.04006	2201.98	1995.45	393.51	2.28455	3.56371
329	2020	7	15	5	195.208	2020.53	15.9709	32.5834	292.827	8.03913	2179.15	1976.22	391.482	2.24864	3.51009
330	2020	7	15	6	195.25	2020.53	16.097	32.3168	290.743	8.0442	2162.61	1959.13	384.061	2.25359	3.51903
331	2020	7	15	7	195.292	2020.54	16.1885	32.1431	292.288	8.04828	2151.84	1947.59	378.514	2.26073	3.53095
332	2020	7	15	8	195.333	2020.54	16.247	32.0887	288.848	8.05135	2148.46	1942.96	374.979	2.27312	3.5503
333	2020	7	15	9	195.375	2020.54	16.2369	32.1053	291.039	8.05242	2149.49	1943.4	374.024	2.2787	3.55895
334	2020	7	15	10	195.417	2020.54	16.2329	32.1392	285.164	8.0435	2151.59	1949.25	383.391	2.24324	3.5033
335	2020	7	15	11	195.458	2020.54	16.21	32.0934	288.763	8.04157	2148.75	1947.89	385.004	2.22852	3.48089
336	2020	7	15	12	195.5	2020.54	16.1537	31.917	285.648	8.03665	2137.81	1941.26	388.663	2.18547	3.41559
337	2020	7	15	13	195.542	2020.54	16.1443	31.8853	275.834	8.03272	2135.85	1941.4	392.507	2.16513	3.38414
338	2020	7	15	14	195.583	2020.54	16.168	31.9566	289.707	8.03679	2140.27	1943.17	388.84	2.19116	3.42403
339	2020	7	15	15	195.625	2020.54	16.1492	31.9578	284.704	8.03579	2140.34	1943.8	389.888	2.18562	3.4155
340	2020	7	15	16	195.667	2020.54	16.149	32.0121	284.756	8.03679	2143.71	1946.2	389.29	2.19526	3.4301
341	2020	7	15	17	195.708	2020.54	16.148	32.059	286.739	8.03679	2146.62	1948.66	389.675	2.19988	3.43693
342	2020	7	15	18	195.75	2020.54	16.1309	32.1493	284.951	8.03279	2152.22	1955.28	394.622	2.19068	3.42193
343	2020	7	15	19	195.792	2020.54	16.1089	32.2854	282.647	8.02979	2160.66	1963.9	398.942	2.18984	3.41966
344	2020	7	15	20	195.833	2020.54	16.1154	32.369	283.308	8.03179	2165.85	1967.34	397.512	2.20711	3.44589
345	2020	7	15	21	195.875	2020.54	16.1198	32.3822	280.523	8.02579	2166.67	1970.69	404.064	2.18338	3.4087
346	2020	7	15	22	195.917	2020.54	16.1075	32.4378	277.172	8.02879	2170.12	1972.34	401.298	2.20059	3.43521
347	2020	7	15	23	195.958	2020.54	16.0749	32.5292	278.055	8.03179	2175.79	1976	398.841	2.21989	3.46484
348	2020	7	16	0	196	2020.54	16.045	32.5622	283.156	8.02979	2177.83	1978.84	401.253	2.2123	3.45296
349	2020	7	16	1	196.042	2020.54	15.9381	32.6474	285.877	8.03179	2183.12	1983.13	399.791	2.22092	3.46656
350	2020	7	16	2	196.083	2020.54	15.9326	32.4886	283.244	8.02879	2173.27	1976.2	401.671	2.19204	3.42279
351	2020	7	16	3	196.125	2020.54	15.8825	32.2124	286.365	8.02779	2156.14	1962.49	400.388	2.15685	3.37044
352	2020	7	16	4	196.167	2020.54	15.7916	32.1528	292.431	8.02779	2152.44	1959.97	399.85	2.1441	3.35167
353	2020	7	16	5	196.208	2020.54	15.78	32.1084	291.298	8.02479	2149.68	1959.03	402.683	2.1265	3.3246
354	2020	7	16	6	196.25	2020.54	15.8005	31.9751	284.558	8.02079	2141.42	1953.62	405.86	2.09876	3.28218
355	2020	7	16	7	196.292	2020.54	15.794	31.9623	283.384	8.01879	2140.62	1953.85	407.915	2.08892	3.26694
356	2020	7	16	8	196.333	2020.54	15.7369	32.0131	282.175	8.02079	2143.77	1956.04	406.161	2.09768	3.28063
357	2020	7	16	9	196.375	2020.54	15.7225	32.0166	279.317	8.01479	2143.99	1958.91	412.728	2.07264	3.24156
358	2020	7	16	10	196.417	2020.54	15.7089	32.0719	281.401	8.01379	2147.42	1962.35	414.309	2.07287	3.24156
359	2020	7	16	11	196.458	2020.54	15.6989	32.1139	280.45	8.00879	2150.03	1966.79	420.226	2.05602	3.21495
360	2020	7	16	12	196.5	2020.54	15.707	32.1874	275.045	8.00979	2154.58	1970.19	419.772	2.06756	3.23235	24.6706	32.2506	249.623	7.86506	2169.83	1989.22	625.466	2.16992	3.31429
361	2020	7	16	13	196.542	2020.54	15.7062	32.2351	277.385	8.00979	2157.54	1972.72	420.199	2.072	3.23893	24.6383	32.2715	255.041	7.86506	2170.76	1990.18	625.619	2.169	3.31303
362	2020	7	16	14	196.583	2020.54	15.7179	32.3247	281.599	8.01079	2163.1	1976.95	419.888	2.08539	3.25907	24.5944	32.3153	256.537	7.86406	2172.71	1992.5	627.613	2.16473	3.30657
363	2020	7	16	15	196.625	2020.54	15.7279	32.4344	281.885	8.01479	2169.91	1980.93	416.414	2.11288	3.3011	24.4818	32.3622	259.727	7.86306	2174.79	1995.36	629.614	2.15533	3.29291
364	2020	7	16	16	196.667	2020.54	15.8009	32.5451	286.721	8.01479	2176.77	1986.28	417.423	2.12896	3.32483	24.505	32.3531	263.95	7.86813	2174.39	1992.66	621.115	2.17788	3.32721
365	2020	7	16	17	196.708	2020.54	15.8861	32.5581	280.292	8.01679	2177.58	1985.51	415.352	2.14495	3.34906	24.6105	32.2847	260.979	7.87821	2171.35	1985.04	604.185	2.22398	3.39717
366	2020	7	16	18	196.75	2020.54	15.9059	32.5567	284.417	8.02179	2177.49	1983.08	409.84	2.16719	3.38365	24.576	32.3075	267.866	7.88629	2172.36	1982.49	591.46	2.25806	3.44938
367	2020	7	16	19	196.792	2020.54	15.9092	32.5912	284.353	8.02079	2179.63	1985.32	411.236	2.16661	3.38245	24.5951	32.2895	268.713	7.89536	2171.56	1977.62	577.145	2.29807	3.51046
368	2020	7	16	20	196.833	2020.54	15.944	32.7532	281.684	8.01979	2189.68	1994.04	413.759	2.18081	3.4031	24.6384	32.2612	267.074	7.90344	2170.3	1972.64	564.586	2.33533	3.56718
369	2020	7	16	21	196.875	2020.54	15.94	32.7753	274.959	8.02079	2191.05	1994.78	412.845	2.18687	3.41242	24.69	32.2431	264.447	7.90852	2169.5	1969.31	556.816	2.36102	3.60604
370	2020	7	16	22	196.917	2020.54	15.942	32.7758	275.078	8.02279	2191.08	1993.9	410.648	2.19554	3.42592	24.7748	32.217	262.561	7.91159	2168.33	1966.38	552.049	2.37997	3.63431
371	2020	7	16	23	196.958	2020.54	15.936	32.8404	273.634	8.02279	2195.09	1997.33	411.204	2.20138	3.43459	24.7631	32.2151	260.047	7.96867	2168.25	1939.1	472.819	2.64997	4.04678
372	2020	7	17	0	197	2020.54	15.932	32.7914	272.104	8.02179	2192.05	1995.23	411.88	2.19205	3.42043	24.7918	32.1937	258.31	7.97375	2167.3	1935.63	466.164	2.67588	4.08622
373	2020	7	17	1	197.042	2020.54	15.9008	33.0671	275.605	8.02179	2209.15	2009.92	414.26	2.21648	3.45671	24.819	32.1815	256.822	7.97483	2166.75	1934.47	464.713	2.68266	4.09637
374	2020	7	17	2	197.083	2020.54	15.7369	33.1658	284.098	8.02379	2215.27	2015.32	412.846	2.22184	3.4656	24.8161	32.1824	255.326	7.9729	2166.79	1935.48	467.176	2.67288	4.08145
375	2020	7	17	3	197.125	2020.54	15.6123	33.003	288.991	8.02479	2205.18	2007.18	410.296	2.20056	3.43456	24.769	32.191	254.847	7.96598	2167.18	1939.55	476.178	2.63499	4.02407
376	2020	7	17	4	197.167	2020.54	15.6263	32.9107	287.608	8.02779	2199.45	2000.89	406.234	2.20543	3.44273	24.8177	32.1872	253.43	7.96906	2167.01	1937.54	472.149	2.65435	4.0531
377	2020	7	17	5	197.208	2020.54	15.601	32.9187	284.719	8.02479	2199.95	2002.84	409.566	2.1915	3.42113	24.8523	32.1841	253.558	7.97513	2166.87	1934.16	464.322	2.68756	4.10343
378	2020	7	17	6	197.25	2020.54	15.661	32.8468	285.624	8.01979	2195.49	2000.89	414.468	2.1681	3.38468	24.8679	32.1769	253.012	7.90421	2166.55	1967.72	562.849	2.35101	3.58946
379	2020	7	17	7	197.292	2020.54	15.6653	32.7969	284.006	8.01979	2192.39	1998.24	414.034	2.16362	3.37803	24.876	32.1707	252.765	7.90529	2166.27	1966.95	561.179	2.35603	3.5971
380	2020	7	17	8	197.333	2020.54	15.642	32.9269	279.417	8.01479	2200.46	2007.47	420.736	2.15339	3.36127	24.9046	32.1639	252.247	7.90636	2165.97	1966.02	559.51	2.36274	3.60711
381	2020	7	17	9	197.375	2020.54	15.637	32.9435	279.503	8.01279	2201.49	2009.27	423.131	2.14626	3.35005	24.9715	32.162	246.785	7.90244	2165.89	1967.3	565.428	2.3505	3.58772
382	2020	7	17	10	197.417	2020.54	15.5998	33.0623	272.12	8.00979	2208.85	2017.13	427.581	2.14221	3.34314	24.9886	32.1623	244.944	7.90052	2165.9	1968.08	568.359	2.3433	3.57655
383	2020	7	17	11	197.458	2020.54	15.5647	33.2001	283.226	8.00879	2217.4	2025.08	429.952	2.14839	3.35206	24.977	32.1641	246.867	7.8966	2165.98	1970.01	574.388	2.32489	3.54856
384	2020	7	17	12	197.5	2020.54	15.5437	33.2648	282.123	8.01279	2221.42	2026.84	425.965	2.16967	3.38496	24.9207	32.1748	246.395	7.89067	2166.46	1973.46	583.653	2.29477	3.50308
385	2020	7	17	13	197.542	2020.54	15.51	33.3152	268.256	8.01379	2224.54	2029.28	425.266	2.17608	3.39486	24.6614	32.2253	243.981	7.87775	2168.7	1982.77	604.493	2.22136	3.39318
386	2020	7	17	14	197.583	2020.54	15.5379	33.3024	279.877	8.02279	2223.75	2024.33	415.068	2.21525	3.45585	24.4323	32.2652	251.713	7.87983	2170.48	1984.78	601.401	2.21513	3.38559
387	2020	7	17	15	197.625	2020.54	15.7199	33.1204	298.912	8.02479	2212.46	2012.6	411.346	2.22037	3.46377	24.362	32.2761	261.101	7.8919	2170.96	1980.24	582.388	2.26269	3.45888
388	2020	7	17	16	197.667	2020.54	15.7431	33.0882	277.668	8.02079	2210.46	2012.57	415.497	2.20198	3.43514	24.3535	32.2736	265.182	7.89998	2170.85	1976.56	569.916	2.29731	3.51192
389	2020	7	17	17	197.708	2020.54	15.7271	33.101	283.327	8.01679	2211.26	2015.16	420.068	2.185	3.40869	24.42	32.2524	255.742	7.90206	2169.91	1974.42	566.612	2.31027	3.53124
390	2020	7	17	18	197.75	2020.54	15.7158	33.1082	267.902	8.01679	2211.7	2015.62	420.128	2.18482	3.40844	24.4029	32.2571	261.619	7.90713	2170.12	1972.38	558.977	2.33189	3.56443
391	2020	7	17	19	197.792	2020.54	15.691	33.1479	279.365	8.01579	2214.16	2018.33	421.592	2.1825	3.4047	24.367	32.2623	270.538	7.90921	2170.35	1971.86	555.902	2.33864	3.57506
392	2020	7	17	20	197.833	2020.54	15.5873	33.2786	283.101	8.02179	2222.27	2023.19	415.99	2.21253	3.4514	24.5004	32.222	267.474	7.91329	2168.56	1967.64	549.577	2.36486	3.6141
393	2020	7	17	21	197.875	2020.54	15.5685	33.3093	271.742	8.01879	2224.18	2026.3	419.6	2.20123	3.43369	24.6781	32.1871	263.612	7.91937	2167	1962.37	540.421	2.40471	3.67342
394	2020	7	17	22	197.917	2020.54	15.572	33.3101	274.131	8.02179	2224.23	2024.95	416.259	2.21438	3.45417	24.7929	32.1731	261.262	7.92144	2166.38	1960.12	537.301	2.42294	3.70014
395	2020	7	17	23	197.958	2020.54	15.6719	33.1853	283.918	8.02679	2216.48	2015.43	409.691	2.23153	3.48107	24.9311	32.1663	251.675	7.92152	2166.08	1958.89	537.132	2.43464	3.71656
396	2020	7	18	0	198	2020.54	15.6681	33.2061	287.864	8.02779	2217.77	2016.08	408.771	2.23757	3.49037	25.0559	32.1781	249.099	7.9216	2166.6	1958.41	537.081	2.44684	3.73369
397	2020	7	18	1	198.042	2020.54	15.6899	33.229	273.524	8.02979	2219.19	2016.21	406.789	2.25018	3.50971	25.1895	32.189	247.474	7.92167	2167.09	1957.83	537.02	2.45979	3.75185
398	2020	7	18	2	198.083	2020.54	15.6992	33.2411	281.038	8.02579	2219.95	2018.62	411.277	2.23482	3.48558	25.2947	32.2081	245.831	7.91875	2167.94	1959.16	541.389	2.45697	3.74619
399	2020	7	18	3	198.125	2020.54	15.581	33.3374	275.261	8.01979	2225.92	2027.24	418.733	2.20916	3.44578	25.329	32.2332	250.312	7.91783	2169.06	1960.24	542.9	2.45782	3.74687
400	2020	7	18	4	198.167	2020.54	15.4769	33.4053	281.346	8.02379	2230.13	2029.7	414.83	2.22472	3.47035	25.3394	32.2405	250.245	7.9189	2169.38	1959.92	541.366	2.4644	3.75671
401	2020	7	18	5	198.208	2020.54	15.4667	33.4203	277.458	8.02379	2231.06	2030.56	414.957	2.22537	3.47134	25.3108	32.2411	248.946	7.91798	2169.41	1960.58	542.728	2.45764	3.74671
402	2020	7	18	6	198.25	2020.54	15.394	33.4062	280.45	8.02479	2230.19	2029.87	413.701	2.22261	3.46768	25.2801	32.2401	248.321	7.91706	2169.36	1961.19	544.081	2.45057	3.73628
403	2020	7	18	7	198.292	2020.54	15.3386	33.3739	287.675	8.02379	2228.18	2029.01	414.507	2.21088	3.45003	25.2752	32.2436	247.787	7.91514	2169.52	1962.25	546.939	2.44149	3.72246
404	2020	7	18	8	198.333	2020.54	15.362	33.3814	277.616	8.02179	2228.65	2030.16	416.803	2.20489	3.44044	25.2978	32.2576	247.97	7.90621	2170.14	1966.76	560.356	2.4034	3.66402
405	2020	7	18	9	198.375	2020.54	15.4639	33.2804	291.599	8.02279	2222.38	2023.69	414.849	2.20736	3.44425	25.318	32.278	248.061	7.90129	2171.05	1969.64	567.972	2.38432	3.63451
406	2020	7	18	10	198.417	2020.54	15.4659	33.2011	284.088	8.02279	2217.46	2019.51	414.16	2.19987	3.43312	25.3398	32.302	247.979	7.90037	2172.12	1970.77	569.549	2.38398	3.63354
407	2020	7	18	11	198.458	2020.54	15.5371	33.0104	291.2	8.02479	2205.64	2008.09	410.332	2.19545	3.42708	25.3222	32.3162	247.021	7.89944	2172.75	1971.83	571.064	2.37947	3.62672
408	2020	7	18	12	198.5	2020.54	15.6379	32.9468	288.351	8.02579	2201.69	2003.61	408.726	2.20134	3.43599	25.265	32.3173	244.616	7.89752	2172.8	1973.14	574.034	2.36597	3.60676
409	2020	7	18	13	198.542	2020.54	15.6281	32.9473	284.798	8.02179	2201.72	2005.5	413.121	2.18368	3.4085	25.0299	32.3482	245.472	7.8956	2174.17	1976.72	577.223	2.34006	3.56949
410	2020	7	18	14	198.583	2020.54	15.6489	32.9701	278.174	8.01879	2203.14	2007.91	416.651	2.17483	3.39437	24.9265	32.3705	239.96	7.91167	2175.16	1970.78	552.947	2.40625	3.67137
411	2020	7	18	15	198.625	2020.54	15.746	33.085	288.689	8.02479	2210.26	2010.56	411.05	2.21896	3.46164	24.883	32.3871	256.575	7.92875	2175.9	1963.63	528.128	2.48338	3.78938
412	2020	7	18	16	198.667	2020.54	15.7231	33.0025	299.933	8.02979	2205.15	2004.12	404.876	2.23054	3.48049	24.8549	32.4024	259.469	7.90283	2176.58	1976.51	566.492	2.36248	3.60507
413	2020	7	18	17	198.708	2020.54	15.8387	32.9795	301.295	8.03279	2203.72	2000.74	401.475	2.25032	3.51063	24.9695	32.4081	245.983	7.90991	2176.84	1972.65	555.839	2.40499	3.66863
414	2020	7	18	18	198.75	2020.54	15.883	32.9921	299.546	8.03279	2204.5	2001.09	401.594	2.25508	3.51761	25.055	32.422	253.538	7.91498	2177.45	1970.18	548.365	2.43698	3.71637
415	2020	7	18	19	198.792	2020.54	15.9299	33.027	299.683	8.03079	2206.66	2003.5	404.062	2.25359	3.51465	25.068	32.4281	262.527	7.91506	2177.73	1970.27	548.289	2.43899	3.71923
416	2020	7	18	20	198.833	2020.54	15.965	33.0501	296.621	8.03579	2208.1	2002.16	398.878	2.28046	3.5561	25.0478	32.4041	263.137	7.91614	2176.66	1969.05	546.542	2.44019	3.72151
417	2020	7	18	21	198.875	2020.54	16.025	33.1415	294.975	8.03279	2213.77	2007.89	402.888	2.28126	3.55618	25.0308	32.4385	259.911	7.91321	2178.19	1971.77	551.101	2.4281	3.70293
418	2020	7	18	22	198.917	2020.54	16.0356	33.1679	291.2	8.03479	2215.4	2008.27	400.952	2.29353	3.57502	25.0939	32.4645	256.066	7.90529	2179.35	1975.96	563.169	2.3992	3.65795
419	2020	7	18	23	198.958	2020.55	16.0271	33.1824	294.229	8.03279	2216.3	2010.02	403.232	2.28551	3.56248	25.073	32.4918	254.44	7.90037	2180.56	1979.37	570.87	2.37721	3.62439
420	2020	7	19	0	199	2020.55	15.934	33.2311	295.655	8.03179	2219.33	2013.68	404.702	2.27852	3.55195	25.0864	32.5041	252.474	7.89644	2181.11	1981.53	577.008	2.36154	3.60026
421	2020	7	19	1	199.042	2020.55	15.9137	33.2329	293.202	8.03179	2219.44	2013.92	404.712	2.27707	3.54985	25.0582	32.5195	250.687	7.89252	2181.79	1984.08	583.227	2.34273	3.57173
422	2020	7	19	2	199.083	2020.55	15.8325	33.2765	292.821	8.02979	2222.14	2017.69	407.236	2.26618	3.53318	24.9596	32.5451	248.884	7.8976	2182.93	1983.33	575.51	2.35947	3.59809
423	2020	7	19	3	199.125	2020.55	15.5016	33.3838	295.131	8.02579	2228.8	2027.48	412.44	2.23318	3.48351	24.889	32.5741	248.14	7.89968	2184.22	1983.88	572.51	2.36533	3.60753
424	2020	7	19	4	199.167	2020.55	15.5509	33.3451	292.608	8.02179	2226.4	2026.94	416.557	2.21611	3.45678	24.885	32.5923	242.352	7.87375	2185.03	1996.38	613.801	2.25118	3.43331
425	2020	7	19	5	199.208	2020.55	15.6399	33.2888	289.893	8.02079	2222.9	2023.82	417.211	2.21334	3.45219	24.8733	32.6129	243.487	7.87283	2185.95	1997.62	615.47	2.24784	3.42817
426	2020	7	19	6	199.25	2020.55	15.7239	33.2106	290.612	8.01879	2218.05	2020.04	418.791	2.2038	3.43724	24.9136	32.6308	249.606	7.87391	2186.74	1997.52	613.847	2.25722	3.44192
427	2020	7	19	7	199.292	2020.55	15.6666	33.1834	292.392	8.02179	2216.37	2017.64	415.189	2.2095	3.44676	24.8919	32.6611	251.36	7.87498	2188.09	1998.27	612.312	2.26257	3.45005
428	2020	7	19	8	199.333	2020.55	15.5859	33.1351	283.098	8.01879	2213.37	2017.02	418.075	2.18584	3.4108	24.846	32.6977	254.449	7.89106	2189.72	1992.58	586.791	2.33301	3.55762
429	2020	7	19	9	199.375	2020.55	15.6904	32.9816	283.589	8.01879	2203.85	2008.23	416.768	2.17914	3.40068	24.8312	32.7385	258.736	7.88314	2191.54	1997.77	599.678	2.29973	3.50668
430	2020	7	19	10	199.417	2020.55	15.7789	32.914	292.233	8.02879	2199.66	1999.55	405.228	2.22192	3.46729	24.7897	32.7711	257.961	7.87221	2192.99	2004.18	617.68	2.25088	3.43236
431	2020	7	19	11	199.458	2020.55	15.8603	32.9543	296.069	8.02679	2202.16	2002.01	407.775	2.22369	3.46911	24.7271	32.8063	259.553	7.87529	2194.55	2004.48	612.887	2.26203	3.44971
432	2020	7	19	12	199.5	2020.55	15.8592	32.9611	289.204	8.02279	2202.58	2004.19	412.221	2.20718	3.44331	24.6451	32.8446	261.34	7.87837	2196.26	2005.01	608.148	2.27188	3.46526
433	2020	7	19	13	199.542	2020.55	15.9528	32.9186	301.566	8.02779	2199.94	1999.04	406.409	2.23173	3.48121	24.5954	32.8721	267.976	7.88745	2197.48	2002.2	593.761	2.31015	3.52393
434	2020	7	19	14	199.583	2020.55	16.086	32.8485	304.269	8.03479	2195.59	1991.25	398.302	2.26557	3.53349	24.57	32.8927	272.602	7.89052	2198.4	2001.7	589.036	2.32344	3.5443
435	2020	7	19	15	199.625	2020.55	16.5602	32.9479	307.782	8.04579	2201.76	1987.93	387.574	2.36281	3.68038	24.5792	32.9059	276.881	7.8956	2198.98	1999.77	581.167	2.34809	3.58169
436	2020	7	19	16	199.667	2020.55	16.7	32.9794	306.201	8.04579	2203.71	1988.56	387.847	2.37764	3.70204	24.559	32.9192	278.876	7.89668	2199.58	1999.88	579.584	2.35235	3.58829
437	2020	7	19	17	199.708	2020.55	16.6174	32.9559	303.294	8.04179	2202.25	1989.82	391.855	2.35037	3.66047	24.547	32.9312	275.628	7.89575	2200.11	2000.82	581.107	2.34815	3.58191
438	2020	7	19	18	199.75	2020.55	16.6415	32.9898	300.549	8.03879	2204.36	1992.82	395.32	2.3424	3.64758	24.5277	32.948	278.953	7.90483	2200.86	1997.33	567.225	2.38915	3.64452
439	2020	7	19	19	199.792	2020.55	16.8343	33.0709	298.848	8.04279	2209.39	1993.75	391.762	2.38471	3.71116	24.5155	32.9681	274.299	7.92091	2201.75	1990.53	543.299	2.46426	3.75906
440	2020	7	19	20	199.833	2020.55	16.9766	33.1149	298.754	8.04579	2212.12	1993.56	388.965	2.41489	3.75654	24.5257	32.9842	285.592	7.91798	2202.47	1992.42	547.712	2.45283	3.74137
441	2020	7	19	21	199.875	2020.55	16.9462	33.1184	295.454	8.04179	2212.33	1995.87	393.221	2.39443	3.72495	24.5459	32.9871	265.604	7.91706	2202.6	1992.82	549.096	2.45052	3.7376
442	2020	7	19	22	199.917	2020.55	17.025	33.1042	292.331	8.04179	2211.45	1994.57	393.114	2.39954	3.73232	24.5556	32.9957	277.471	7.91414	2202.98	1994.45	553.501	2.43846	3.71902
443	2020	7	19	23	199.958	2020.55	17.0489	33.1561	292.846	8.04179	2214.67	1997.08	393.538	2.40696	3.74323	24.576	33.0062	273.619	7.90722	2203.45	1997.95	563.996	2.40904	3.67385
444	2020	7	20	0	200	2020.55	17.0629	33.168	289.14	8.03879	2215.41	1999.03	396.842	2.39567	3.72546	24.6058	33.0094	265.064	7.90329	2203.59	1999.71	570.004	2.39382	3.65029
445	2020	7	20	1	200.042	2020.55	17.0379	33.0879	291.895	8.03879	2210.44	1995.06	396.183	2.38527	3.71013	24.574	33.0247	260.772	7.89637	2204.27	2003.71	580.818	2.36082	3.60018
446	2020	7	20	2	200.083	2020.55	16.9662	32.9971	289.518	8.03379	2204.81	1993.23	400.802	2.34741	3.65258	24.5347	33.0383	249.042	7.89145	2204.87	2006.75	588.637	2.33641	3.56325
447	2020	7	20	3	200.125	2020.55	17.1043	32.9233	292.468	8.03579	2200.23	1987.47	398.057	2.36015	3.67183	24.5109	33.0491	255.313	7.88852	2205.35	2008.65	593.343	2.32218	3.54172
448	2020	7	20	4	200.167	2020.55	17.388	32.9432	286.861	8.03479	2201.47	1986.94	399.335	2.38121	3.70196	24.4949	33.0556	254.477	7.8866	2205.64	2009.87	596.453	2.31279	3.52751
449	2020	7	20	5	200.208	2020.55	17.4359	32.9435	279.548	8.02879	2201.49	1989.44	405.866	2.35812	3.66565	24.4929	33.0603	250.701	7.88468	2205.85	2010.94	599.565	2.30444	3.51475
450	2020	7	20	6	200.25	2020.55	17.3739	32.82	278.016	8.02579	2193.82	1984.87	408.104	2.32693	3.61868	24.5189	33.0655	250.368	7.88475	2206.08	2010.92	599.483	2.30734	3.51887
451	2020	7	20	7	200.292	2020.55	17.359	32.7767	278.269	8.02279	2191.14	1984.12	411.041	2.308	3.58971	24.5645	33.069	249.404	7.88483	2206.24	2010.7	599.391	2.31173	3.52506
452	2020	7	20	8	200.333	2020.55	17.3684	32.8484	278.366	8.02279	2195.59	1987.79	411.657	2.31606	3.6016	24.586	33.0701	249.587	7.88291	2206.29	2011.48	602.494	2.30503	3.51461
453	2020	7	20	9	200.375	2020.55	17.3707	32.8739	275.435	8.02079	2197.17	1990.03	414.098	2.30999	3.59193	24.5897	33.0791	248.217	7.87899	2206.69	2013.57	608.916	2.28865	3.48952
454	2020	7	20	10	200.417	2020.55	17.3446	32.8924	284.661	8.02679	2198.32	1988.38	407.614	2.3364	3.63307	24.6081	33.0881	235.405	7.87506	2207.09	2015.57	615.403	2.27356	3.46626
455	2020	7	20	11	200.458	2020.55	17.2838	32.9435	280.286	8.01979	2201.49	1994.73	415.798	2.30557	3.58524	24.6286	33.0991	250.968	7.87514	2207.58	2015.79	615.364	2.27644	3.47035
456	2020	7	20	12	200.5	2020.55	17.2371	32.987	278.759	8.01479	2204.18	1999.64	421.794	2.28417	3.55202	24.639	33.1052	245.026	7.87922	2207.85	2014.08	608.745	2.29579	3.49969
457	2020	7	20	13	200.542	2020.55	17.2019	33.0218	273.933	8.00679	2206.34	2005.39	431.246	2.24995	3.49882	24.6497	33.1081	259.036	7.88729	2207.98	2010.4	595.749	2.33295	3.55622
458	2020	7	20	14	200.583	2020.55	17.2009	33.0255	271.958	8.00879	2206.57	2004.67	428.974	2.25892	3.51274	24.6699	33.1063	260.806	7.89337	2207.9	2007.38	586.105	2.36194	3.6002
459	2020	7	20	15	200.625	2020.55	17.3211	32.9364	291.499	8.03379	2201.04	1987.54	400.35	2.37043	3.68583	24.676	33.1083	265.088	7.89945	2207.99	2004.56	576.629	2.39032	3.64338
460	2020	7	20	16	200.667	2020.55	17.4173	32.8037	290.039	8.03279	2192.81	1980.44	400.343	2.36011	3.67005	24.6809	33.104	269.539	7.90652	2207.8	2001.04	565.719	2.42298	3.69314
461	2020	7	20	17	200.708	2020.55	17.6404	32.7843	286.355	8.03379	2191.61	1977.37	399.13	2.3811	3.70089	24.7121	33.0986	252.255	7.9116	2207.56	1998.22	557.988	2.44883	3.73224
462	2020	7	20	18	200.75	2020.55	17.603	32.7719	282.105	8.01479	2190.84	1985.86	419.991	2.292	3.56281	24.73	33.0952	276.931	7.91968	2207.41	1994.11	545.919	2.48806	3.79186
463	2020	7	20	19	200.792	2020.55	17.6117	32.8066	276.032	8.02879	2192.99	1981.09	404.741	2.35848	3.66579	24.7421	33.0868	277.114	7.92476	2207.03	1991.28	538.412	2.51251	3.82906
464	2020	7	20	20	200.833	2020.55	17.5398	32.9701	279.798	8.02879	2203.14	1990.08	406.103	2.36946	3.68216	24.7829	33.0681	278.695	7.92283	2206.2	1991.26	541.093	2.50536	3.81787
465	2020	7	20	21	200.875	2020.55	17.4977	33.0039	282.275	8.03079	2205.23	1991.19	404.192	2.37852	3.69632	24.9	33.0246	271.532	7.91591	2204.26	1992.21	551.012	2.47919	3.77704
466	2020	7	20	22	200.917	2020.55	17.4719	33.0155	281.611	8.02979	2205.95	1992.45	405.38	2.37305	3.68796	25.1155	32.9699	263.194	7.91199	2201.83	1990.63	556.484	2.47495	3.76863
467	2020	7	20	23	200.958	2020.55	17.2675	33.195	285.935	8.02979	2217.09	2003.23	406.859	2.37461	3.69074	25.2279	32.9392	250.951	7.91006	2200.47	1989.67	559.157	2.47314	3.76487
468	2020	7	21	0	201	2020.55	17.2588	33.1906	287.504	8.03379	2216.81	2001.16	402.451	2.3916	3.71724	25.3708	32.9112	248.031	7.91014	2199.22	1987.64	558.828	2.48366	3.77952
469	2020	7	21	1	201.042	2020.55	17.2199	33.2025	282.294	8.00579	2217.55	2015.18	434.042	2.26485	3.52047	25.4169	32.9061	252.598	7.91022	2198.99	1987.1	558.668	2.48765	3.78511
470	2020	7	21	2	201.083	2020.55	17.1968	33.2158	282.294	8.03179	2218.38	2003.87	404.833	2.37995	3.69948	25.468	32.8886	251.579	7.90829	2198.21	1987.04	561.453	2.48157	3.77543
471	2020	7	21	3	201.125	2020.55	17.132	33.2626	282.574	8.02979	2221.28	2007.72	407.408	2.37032	3.68471	25.601	32.9106	253.605	7.90837	2199.19	1986.84	561.461	2.49554	3.79496
472	2020	7	21	4	201.167	2020.55	17.1264	33.3149	281.3	8.02479	2224.52	2012.84	413.383	2.35265	3.65689	25.6319	32.9516	254.334	7.91245	2201.02	1986.11	555.566	2.52122	3.83328
473	2020	7	21	5	201.208	2020.55	17.1434	33.3797	279.536	8.02879	2228.54	2014.19	409.5	2.37874	3.69679	25.6376	32.9798	254.05	7.91553	2202.27	1985.58	551.138	2.53892	3.85988
474	2020	7	21	6	201.25	2020.55	17.1719	33.4117	278.719	8.03179	2230.53	2014.21	406.47	2.39806	3.72633	25.6469	32.9808	252.445	7.9136	2202.32	1986.48	554.022	2.53061	3.84712
475	2020	7	21	7	201.292	2020.55	17.1928	33.4403	279.478	8.03279	2232.3	2015.06	405.615	2.40734	3.74034	25.6696	32.9821	252.652	7.91468	2202.37	1985.84	552.411	2.53792	3.85796
476	2020	7	21	8	201.333	2020.55	17.182	33.4783	279.585	8.02979	2234.66	2018.55	409.233	2.39662	3.7235	25.6869	32.9934	253.223	7.91376	2202.88	1986.57	553.865	2.53602	3.85476
477	2020	7	21	9	201.375	2020.55	17.1041	33.487	296.38	8.03779	2235.2	2015.72	400.544	2.4277	3.7724	25.7109	32.9881	251.419	7.90983	2202.64	1988.11	559.743	2.51891	3.82852
478	2020	7	21	10	201.417	2020.55	17.1981	33.4275	289.695	8.03379	2231.51	2013.88	404.415	2.41104	3.74615	25.7459	32.9952	252.463	7.90891	2202.96	1988.56	561.183	2.51823	3.82702
479	2020	7	21	11	201.458	2020.55	17.3245	33.2638	288.574	8.02879	2221.35	2006.87	408.547	2.3819	3.70102	25.764	33.0024	252.939	7.90999	2203.28	1988.16	559.593	2.52561	3.83797
480	2020	7	21	12	201.5	2020.55	17.4599	33.2887	288.272	8.02779	2222.9	2007.65	409.879	2.3912	3.7141	25.7792	33.0031	251.73	7.90906	2203.31	1988.52	560.995	2.52261	3.83323
481	2020	7	21	13	201.542	2020.55	17.443	33.3378	282.483	8.02279	2225.94	2012.71	415.866	2.37213	3.68424	25.8058	32.9991	251.187	7.90714	2203.13	1989.12	563.89	2.51545	3.82206
482	2020	7	21	14	201.583	2020.55	17.4339	33.3896	297.151	8.03379	2229.16	2010.19	404.123	2.42698	3.76911	25.8199	32.9952	250.348	7.90722	2202.96	1988.85	563.744	2.51673	3.82389
483	2020	7	21	15	201.625	2020.55	17.458	33.3875	274.295	8.03079	2229.03	2011.35	407.399	2.41499	3.75029	25.8702	32.9931	251.443	7.9103	2202.86	1986.93	559.038	2.53579	3.85226
484	2020	7	21	16	201.667	2020.55	17.431	33.4566	272.458	8.02979	2233.31	2015.61	409.08	2.41528	3.75045	25.8729	33.0022	252.093	7.91537	2203.27	1984.76	551.45	2.56131	3.89093
485	2020	7	21	17	201.708	2020.55	17.4161	33.4771	263.027	8.02879	2234.58	2017.26	410.359	2.41155	3.74463	25.853	32.9966	249.661	7.91345	2203.02	1985.64	554.304	2.54973	3.87362
486	2020	7	21	18	201.75	2020.55	17.369	33.5107	264.088	8.02879	2236.67	2019.35	410.638	2.41105	3.74403	25.816	32.9651	248.867	7.91453	2201.62	1984.27	552.489	2.54886	3.87301
487	2020	7	21	19	201.792	2020.55	17.3204	33.5601	276.967	8.03979	2239.73	2016.93	398.997	2.463	3.82475	25.798	32.9191	249.334	7.9196	2199.57	1980.31	544.631	2.56777	3.90239
488	2020	7	21	20	201.833	2020.55	17.506	33.415	293.818	8.04079	2230.73	2007.58	396.746	2.46828	3.83239	25.814	32.8797	249.483	7.92368	2197.82	1976.81	538.372	2.58558	3.92963
489	2020	7	21	21	201.875	2020.55	17.6415	33.3366	297.846	8.03479	2225.87	2005.45	402.608	2.44366	3.79356	25.8467	32.8512	249.098	7.92576	2196.55	1974.56	535.147	2.59618	3.94561
490	2020	7	21	22	201.917	2020.55	17.732	33.3151	294.567	8.02879	2224.54	2006.57	409.025	2.42136	3.7583	25.8386	32.8381	248.763	7.92483	2195.97	1974.61	536.412	2.58977	3.93609
491	2020	7	21	23	201.958	2020.55	17.732	33.3272	293.51	8.03279	2225.29	2005.27	404.722	2.4411	3.78884	25.7742	32.8421	248.665	7.92191	2196.15	1976.64	540.737	2.57005	3.90684
492	2020	7	22	0	202	2020.55	17.6823	33.3654	284.527	8.02579	2227.66	2010.98	412.777	2.40862	3.73858	25.7649	32.8351	248.143	7.91999	2195.83	1977.4	543.527	2.55927	3.89063
493	2020	7	22	1	202.042	2020.55	17.6695	33.373	284.472	8.02579	2228.13	2011.46	412.84	2.40833	3.73818	25.709	32.8456	247.972	7.91707	2196.3	1979.59	547.94	2.54106	3.86351
494	2020	7	22	2	202.083	2020.55	17.677	33.367	279.816	8.02979	2227.76	2009.17	408.351	2.42673	3.76672	25.6238	32.8751	248.768	7.91414	2197.61	1982.65	552.516	2.52199	3.83523
495	2020	7	22	3	202.125	2020.55	17.6719	33.3634	278.918	8.02979	2227.53	2009.03	408.32	2.42592	3.76555	25.5995	32.8768	249.29	7.91522	2197.69	1982.36	550.922	2.52512	3.84026
496	2020	7	22	4	202.167	2020.55	17.6681	33.3604	276.541	8.02679	2227.35	2010.34	411.62	2.41149	3.7432	25.5701	32.8762	243.613	7.9083	2197.66	1985.88	561.347	2.48951	3.78645
497	2020	7	22	5	202.208	2020.55	17.639	33.3637	283.226	8.02779	2227.55	2010.24	410.533	2.41398	3.74729	25.528	32.8768	249.167	7.90737	2197.69	1986.64	562.761	2.4815	3.77473
498	2020	7	22	6	202.25	2020.55	16.8738	33.5935	282.973	8.01679	2241.8	2032.94	424.769	2.32417	3.61269	25.514	32.8731	250.51	7.90945	2197.52	1985.61	559.588	2.48976	3.7875
499	2020	7	22	7	202.292	2020.55	16.4421	33.7289	288.351	8.02279	2250.2	2040.26	419.048	2.32922	3.62318	25.5009	32.8672	251.38	7.90753	2197.26	1986.41	562.467	2.47902	3.77136
500	2020	7	22	8	202.333	2020.55	16.4494	33.7417	291.289	8.02379	2251	2040.41	418.036	2.33557	3.6329	25.507	32.8621	250.156	7.9046	2197.03	1987.58	566.89	2.46537	3.75057
501	2020	7	22	9	202.375	2020.55	16.2756	33.7399	294.93	8.02679	2250.89	2040.14	414.623	2.33461	3.63286	25.5129	32.8369	251.452	7.89968	2195.91	1988.98	574.296	2.44073	3.71323
502	2020	7	22	10	202.417	2020.55	16.3293	33.7168	298.739	8.02779	2249.45	2038.08	413.324	2.34118	3.6428	25.522	32.8744	254.944	7.90176	2197.58	1989.27	571.346	2.45438	3.73357
503	2020	7	22	11	202.458	2020.55	16.3773	33.7196	304.214	8.03079	2249.63	2036.45	410.034	2.3589	3.66996	25.5083	32.9288	256.69	7.90384	2200	1990.31	568.528	2.46753	3.75325
504	2020	7	22	12	202.5	2020.55	16.4701	33.736	307.791	8.03179	2250.64	2036.15	409.089	2.37274	3.69059	25.2495	32.7504	263.7	7.92091	2192.07	1977.64	541.743	2.51019	3.82272
505	2020	7	22	13	202.542	2020.55	16.5467	33.7263	302.962	8.02579	2250.04	2037.95	415.683	2.35098	3.65617	25.071	32.7859	264.152	7.94099	2193.64	1970.41	513.255	2.59404	3.9522
506	2020	7	22	14	202.583	2020.56	16.4761	33.7416	299.068	8.02879	2250.99	2037.83	412.457	2.36023	3.67103	25.0227	32.8302	262.403	7.94807	2195.62	1968.82	503.728	2.62832	4.00458
507	2020	7	22	15	202.625	2020.56	16.569	33.7161	304.153	8.02979	2249.41	2035.35	411.148	2.36985	3.68541	25.0909	32.8606	263.044	7.95498	2196.97	1965.94	494.461	2.6717	4.06955
508	2020	7	22	16	202.667	2020.56	16.57	33.7239	292.264	8.02779	2249.89	2036.71	413.435	2.36168	3.67262	25.271	32.8638	262.256	7.95889	2197.11	1962.74	489.14	2.70853	4.1234
509	2020	7	22	17	202.708	2020.56	16.5549	33.728	293.827	8.02279	2250.15	2039.41	419.067	2.33835	3.63644	25.3339	32.8778	259.586	7.9598	2197.73	1962.29	487.973	2.72037	4.14051
510	2020	7	22	18	202.75	2020.56	16.5135	33.7291	299.272	8.02779	2250.22	2037.39	413.468	2.35754	3.66663	25.3409	32.8654	259.506	7.95971	2197.18	1961.86	488.02	2.71943	4.13911
511	2020	7	22	19	202.792	2020.56	16.529	33.6846	301.786	8.03679	2247.46	2030.65	403.193	2.39517	3.72535	25.4928	32.8117	254.467	7.95062	2194.79	1963.44	499.943	2.68299	4.0823
512	2020	7	22	20	202.833	2020.56	16.6409	33.6638	301.45	8.03279	2246.17	2030.68	407.409	2.38414	3.70739	25.6619	32.7552	251.823	7.94453	2192.28	1963.27	507.934	2.66319	4.05064
513	2020	7	22	21	202.875	2020.56	16.6925	33.667	298.196	8.02879	2246.36	2032.38	411.863	2.37058	3.68585	25.594	32.7859	251.674	7.93744	2193.64	1968.35	518.073	2.62453	3.99236
514	2020	7	22	22	202.917	2020.56	16.6847	33.6802	297.416	8.02179	2247.18	2036.45	419.809	2.33972	3.63783	25.437	32.8359	254.137	7.92835	2195.87	1975.71	531.42	2.57019	3.9111
515	2020	7	22	23	202.958	2020.56	16.669	33.701	294.198	8.02079	2248.47	2038.12	421.117	2.33603	3.63208	25.415	32.8391	252.525	7.92126	2196.01	1979.43	541.775	2.53429	3.8567
516	2020	7	23	0	203	2020.56	16.7562	33.6	293.226	8.02679	2242.21	2029.39	413.526	2.36003	3.66939	25.4165	32.8243	250.434	7.91617	2195.35	1981.35	549.202	2.50882	3.81806
517	2020	7	23	1	203.042	2020.56	16.9899	33.6183	290.719	8.02279	2243.34	2030.56	418.207	2.36311	3.67205	25.398	32.8161	248.257	7.91108	2194.99	1983.63	556.767	2.48236	3.77807
518	2020	7	23	2	203.083	2020.56	17.1664	33.5981	293.885	8.02479	2242.09	2027.27	415.815	2.38478	3.70434	25.3823	32.8095	245.036	7.90599	2194.69	1985.93	564.434	2.4565	3.73895
519	2020	7	23	3	203.125	2020.56	17.218	33.6195	291.91	8.02579	2243.42	2027.53	414.885	2.39583	3.72089	25.2489	32.8523	244.172	7.8979	2196.6	1992.19	577.195	2.41097	3.67075
520	2020	7	23	4	203.167	2020.56	17.1827	33.6189	286.62	8.01179	2243.38	2034.41	430.811	2.32959	3.61832	25.1262	32.8971	242.847	7.89081	2198.59	1997.95	588.633	2.37173	3.61196
521	2020	7	23	5	203.208	2020.56	17.1719	33.6239	282.952	8.01379	2243.69	2033.81	428.544	2.33815	3.63168	25.042	32.9305	241.876	7.88172	2200.08	2003.93	603.407	2.32633	3.54342
522	2020	7	23	6	203.25	2020.56	17.034	33.6564	283.004	7.99979	2245.71	2043.04	445.209	2.26821	3.52395	25.005	32.9461	240.172	7.87663	2200.77	2007.07	611.799	2.3018	3.50632
523	2020	7	23	7	203.292	2020.56	16.889	33.6915	278.78	8.00179	2247.88	2044.97	443.11	2.26878	3.52579	25.0119	32.9482	240.905	7.87254	2200.87	2008.97	618.542	2.28441	3.47975
524	2020	7	23	8	203.333	2020.56	16.7989	33.6324	290.441	8.01579	2244.22	2035.97	426.237	2.31749	3.60265	25.0208	32.9457	238.688	7.86845	2200.75	2010.68	625.316	2.26693	3.45305
525	2020	7	23	9	203.375	2020.56	16.959	33.5731	285.383	8.00679	2240.54	2035.95	436.159	2.28477	3.55089	25.0279	32.9422	238.007	7.86736	2200.6	2011	627.111	2.26246	3.44619
526	2020	7	23	10	203.417	2020.56	17.0099	33.5148	285.399	8.00279	2236.92	2034.4	440.34	2.26561	3.52111	25.054	32.9406	238.788	7.86727	2200.53	2010.81	627.253	2.26406	3.44838
527	2020	7	23	11	203.458	2020.56	16.9355	33.5355	295.545	8.02079	2238.21	2027.58	419.733	2.3413	3.63922	25.045	32.9352	239.597	7.87018	2200.29	2009.35	622.356	2.27569	3.46622
528	2020	7	23	12	203.5	2020.56	16.9913	33.4762	295.887	8.01679	2234.53	2025.98	423.764	2.32204	3.60925	25.0462	32.9291	243.141	7.87709	2200.02	2005.97	610.92	2.30589	3.51226
529	2020	7	23	13	203.542	2020.56	17.1428	33.3727	288.912	8.00879	2228.11	2023.24	432.072	2.28861	3.55679	25.0649	32.9131	238.058	7.883	2199.3	2002.56	601.211	2.33258	3.55285
530	2020	7	23	14	203.583	2020.56	17.409	33.4071	291.538	8.02179	2230.24	2017.03	417.581	2.37185	3.68359	25.1565	32.8711	249.287	7.88491	2197.44	1999.55	597.834	2.34544	3.5718
531	2020	7	23	15	203.625	2020.56	17.3834	33.427	293.982	8.02079	2231.48	2018.72	418.875	2.36724	3.67649	25.2434	32.8404	254.257	7.89182	2196.07	1994.65	586.624	2.38162	3.62623
532	2020	7	23	16	203.667	2020.56	17.3493	33.4504	289.869	8.00379	2232.93	2028.18	438.669	2.29091	3.55806	25.258	32.8272	263.492	7.90373	2195.48	1988.49	568.02	2.43666	3.70998
533	2020	7	23	17	203.708	2020.56	17.2989	33.4765	290.835	8.01079	2234.55	2026.62	430.724	2.32041	3.60412	25.2726	32.8132	268.533	7.91264	2194.86	1983.66	554.421	2.47846	3.77358
534	2020	7	23	18	203.75	2020.56	17.238	33.4996	286.889	8.00879	2235.98	2029.2	433.237	2.30887	3.58655	25.2956	32.793	271.024	7.91955	2193.96	1979.47	544.013	2.51149	3.82379
535	2020	7	23	19	203.792	2020.56	17.2982	33.4663	297.55	8.02979	2233.91	2017.08	409.147	2.40512	3.73577	25.4366	32.7421	267.468	7.91746	2191.7	1977.68	546.737	2.50965	3.81984
536	2020	7	23	20	203.833	2020.56	17.3518	33.3757	298.614	8.02979	2228.29	2011.99	408.39	2.40027	3.72846	25.8531	32.6476	259.486	7.92537	2187.49	1967.55	534.414	2.57681	3.91801
537	2020	7	23	21	203.875	2020.56	17.4554	33.3686	292.675	8.02379	2227.85	2013.74	415.011	2.38085	3.69744	26.1722	32.5919	252.662	7.93528	2185.01	1958.42	519.722	2.64983	4.02565
538	2020	7	23	22	203.917	2020.56	17.5553	33.3877	294.244	8.02279	2229.04	2014.49	416.31	2.38658	3.70532	26.3307	32.5648	249.42	7.94119	2183.81	1953.38	511.162	2.69172	4.08757
539	2020	7	23	23	203.958	2020.56	17.483	33.3252	292.261	8.02179	2225.16	2012.24	416.886	2.36963	3.68011	26.3882	32.5499	247.407	7.9431	2183.15	1951.48	508.381	2.70539	4.10776
540	2020	7	24	0	204	2020.56	17.46	33.3123	291.045	8.01679	2224.36	2014.1	422.423	2.3439	3.64045	26.4141	32.5339	244.219	7.94001	2182.43	1952.28	512.593	2.6908	4.08543
541	2020	7	24	1	204.042	2020.56	17.5236	33.3312	286.319	8.01179	2225.53	2016.98	428.323	2.32866	3.61608	26.4196	32.5165	244.072	7.94092	2181.66	1951.18	511.212	2.69428	4.09084
542	2020	7	24	2	204.083	2020.56	17.5497	33.3734	287.09	8.01079	2228.15	2019.46	429.858	2.33056	3.61851	26.4204	32.5026	244.304	7.94083	2181.04	1950.73	511.255	2.69262	4.08844
543	2020	7	24	3	204.125	2020.56	17.5449	33.4233	286.691	8.00679	2231.25	2023.98	434.953	2.31734	3.59765	26.414	32.4951	244.344	7.93974	2180.71	1951.06	512.741	2.68585	4.07832
544	2020	7	24	4	204.167	2020.56	17.5358	33.4191	284.073	7.99879	2230.99	2027.55	444.35	2.28084	3.54109	26.3929	32.4916	244.808	7.93865	2180.55	1951.64	514.26	2.67808	4.06682
545	2020	7	24	5	204.208	2020.56	17.4969	33.4354	282.294	8.00079	2232	2027.75	442.114	2.28811	3.55258	26.3509	32.4881	246.203	7.93756	2180.4	1952.37	515.793	2.66837	4.05263
546	2020	7	24	6	204.25	2020.56	17.4546	33.4397	282.766	7.99979	2232.26	2028.74	443.329	2.28073	3.54145	26.3273	32.4841	246.441	7.93647	2180.22	1952.94	517.317	2.66036	4.04081
547	2020	7	24	7	204.292	2020.56	17.0712	33.5204	287.879	8.01479	2237.27	2028.66	426.457	2.32405	3.61138	26.3369	32.4782	246.948	7.93438	2179.96	1953.7	520.24	2.65032	4.0255
548	2020	7	24	8	204.333	2020.56	17.1768	33.5117	288.004	8.00779	2236.73	2030.73	434.496	2.30069	3.57425	26.344	32.4663	246.66	7.93329	2179.43	1953.77	521.714	2.64449	4.01667
549	2020	7	24	9	204.375	2020.56	17.2847	33.494	284.969	8.00679	2235.63	2029.51	435.53	2.30325	3.57745	26.327	32.4548	246.917	7.9332	2178.91	1953.54	521.78	2.64141	4.01232
550	2020	7	24	10	204.417	2020.56	17.369	33.4131	291.2	7.99979	2230.61	2027.94	443.059	2.27126	3.52765	26.3169	32.4483	245.374	7.92912	2178.62	1955.4	527.598	2.6197	3.97952
551	2020	7	24	11	204.458	2020.56	17.5236	33.3288	290.658	7.99879	2225.39	2022.91	443.513	2.27099	3.52655	26.3028	32.4318	244.256	7.92603	2177.89	1956.43	531.961	2.60174	3.95258
552	2020	7	24	12	204.5	2020.56	17.445	33.2941	297.721	8.01279	2223.23	2015.13	426.829	2.32297	3.6082	26.3109	32.4161	245.496	7.92694	2177.19	1955.38	530.543	2.60553	3.95839
553	2020	7	24	13	204.542	2020.56	17.5202	33.3101	288.577	7.99179	2224.23	2025.17	451.725	2.23846	3.4762	26.2945	32.4041	246.632	7.92785	2176.66	1954.63	529.161	2.6074	3.96155
554	2020	7	24	14	204.583	2020.56	17.7251	33.3124	294.979	8.01179	2224.37	2014.57	428.195	2.34327	3.63718	26.336	32.3848	246.971	7.92976	2175.8	1952.72	526.279	2.61885	3.97864
555	2020	7	24	15	204.625	2020.56	17.8654	33.2789	298.218	8.01579	2222.29	2009.93	423.336	2.36947	3.67686	26.3945	32.349	246.555	7.92967	2174.21	1951.09	526.165	2.62056	3.98088
556	2020	7	24	16	204.667	2020.56	18.1435	33.1558	295.74	8.01179	2214.65	2003.44	426.878	2.36186	3.66355	26.4872	32.3197	246.213	7.92858	2172.9	1949.94	527.515	2.62109	3.98084
557	2020	7	24	17	204.708	2020.56	18.4209	33.0424	295.247	8.02179	2207.62	1990.82	414.564	2.41884	3.75032	26.5693	32.2991	245.932	7.92849	2171.99	1948.67	527.486	2.62636	3.98804
558	2020	7	24	18	204.75	2020.56	18.534	33.0386	295.356	8.02179	2207.38	1989.8	414.538	2.42801	3.76353	26.6556	32.2838	245.085	7.9294	2171.31	1947.06	526.049	2.63745	4.00398
559	2020	7	24	19	204.792	2020.56	18.506	33.0761	291.036	8.01779	2209.71	1993.86	419.369	2.41119	3.73741	26.7268	32.2683	244.294	7.92931	2170.62	1946.05	526.054	2.64221	4.01047
560	2020	7	24	20	204.833	2020.56	18.3934	33.1295	287.388	8.01079	2213.02	2000.76	427.832	2.37539	3.6825	26.7719	32.2512	243.625	7.93022	2169.86	1944.68	524.625	2.64935	4.02093
561	2020	7	24	21	204.875	2020.56	18.3308	33.1655	288.574	8.01279	2215.26	2002.13	425.839	2.38295	3.69451	26.7939	32.2384	243.096	7.93213	2169.29	1943.13	521.807	2.65972	4.03653
562	2020	7	24	22	204.917	2020.56	18.5134	32.8956	291.825	8.02279	2198.51	1982.08	412.201	2.41581	3.74599	26.7996	32.2325	242.036	7.93204	2169.02	1942.93	521.897	2.65927	4.03582
563	2020	7	24	23	204.958	2020.56	18.6128	32.7134	292.571	8.01679	2187.21	1974.78	417.379	2.37769	3.6875	26.799	32.2302	242.39	7.93195	2168.92	1942.9	522.012	2.65855	4.03477
564	2020	7	25	0	205	2020.56	18.584	32.7275	284.107	8.00879	2188.09	1979.46	426.607	2.34079	3.63041	26.7648	32.2308	245.344	7.93386	2168.95	1942.23	519.312	2.66492	4.04486
565	2020	7	25	1	205.042	2020.56	18.557	32.7536	285.463	7.99879	2189.71	1985.64	438.478	2.29687	3.56232	26.7531	32.2296	243.981	7.93177	2168.89	1943.3	522.284	2.65331	4.0274
566	2020	7	25	2	205.083	2020.56	18.5269	32.779	284.969	8.00879	2191.28	1982.54	427.055	2.34139	3.63142	26.7349	32.2044	244.424	7.92868	2167.77	1944.07	526.563	2.63399	3.99856
567	2020	7	25	3	205.125	2020.56	18.428	32.9636	282.818	8.00179	2202.73	1996.11	436.833	2.32091	3.59904	26.7329	32.2152	242.008	7.92559	2168.25	1945.97	531.088	2.61956	3.97656
568	2020	7	25	4	205.167	2020.56	18.5249	32.7279	281.139	7.99079	2188.11	1988.19	447.749	2.25673	3.50054	26.7261	32.2123	241.839	7.9235	2168.13	1946.94	534.106	2.6084	3.95974
569	2020	7	25	5	205.208	2020.56	18.1781	33.0677	285.133	8.00979	2209.19	1999.55	428.409	2.34672	3.64045	26.7021	32.2033	242.685	7.92341	2167.72	1946.84	534.19	2.60494	3.95487
570	2020	7	25	6	205.25	2020.56	18.1789	33.1149	284.777	8.00079	2212.12	2006.21	439.339	2.31143	3.58533	26.6792	32.1882	243.607	7.92432	2167.05	1946.03	532.782	2.60592	3.95679
571	2020	7	25	7	205.292	2020.56	18.1251	33.1553	283.077	7.98279	2214.62	2016.99	461.43	2.2324	3.46291	26.6665	32.1734	243.867	7.92323	2166.39	1946.14	534.279	2.59807	3.94519
572	2020	7	25	8	205.333	2020.56	18.1256	33.1481	280.051	7.99179	2214.18	2012.49	450.378	2.27081	3.52253	26.6494	32.1579	244.569	7.92314	2165.7	1945.76	534.319	2.59466	3.94038
573	2020	7	25	9	205.375	2020.56	18.1026	33.163	279.57	7.99579	2215.1	2011.58	445.705	2.28798	3.54924	26.634	32.1444	244.236	7.92105	2165.1	1946.41	537.289	2.58185	3.92124
574	2020	7	25	10	205.417	2020.56	17.6206	33.3188	276.285	7.99379	2224.77	2024.01	449.426	2.25595	3.50246	26.6408	32.1322	244.333	7.92096	2164.56	1945.98	537.341	2.58093	3.91989
575	2020	7	25	11	205.458	2020.56	17.4339	33.4056	281.047	7.99779	2230.15	2028.02	445.388	2.26697	3.52051	26.6674	32.1301	244.15	7.91787	2164.47	1947.21	541.854	2.56817	3.90021
576	2020	7	25	12	205.5	2020.56	17.3759	33.4461	286.078	8.00779	2232.66	2025.9	433.953	2.31031	3.58801	26.7329	32.1407	244.69	7.91478	2164.94	1948.6	546.47	2.56012	3.88709
577	2020	7	25	13	205.542	2020.56	17.3134	33.3846	290.237	8.01279	2228.85	2020.79	427.603	2.32131	3.60607	26.7775	32.1188	244.443	7.91169	2163.97	1949	550.92	2.5473	3.8673
578	2020	7	25	14	205.583	2020.56	17.9034	33.2006	287.775	8.00179	2217.43	2012.15	438.881	2.30207	3.57254	26.8279	32.0198	243.624	7.9116	2159.56	1945.21	550.4	2.54257	3.86053
579	2020	7	25	15	205.625	2020.56	18.0399	32.988	294.055	8.01679	2204.25	1993.1	419.69	2.35861	3.66075	26.899	31.9874	243.73	7.91451	2158.12	1942.17	545.837	2.56012	3.88666
580	2020	7	25	16	205.667	2020.56	18.073	33.0027	293.016	8.01379	2205.16	1995.04	423.231	2.34937	3.646	26.96	32.0091	244.143	7.91742	2159.08	1941.1	541.649	2.58174	3.91851
581	2020	7	25	17	205.708	2020.56	18.0634	32.9077	295.155	8.01379	2199.26	1990.17	422.397	2.33885	3.63053	27.0319	32.0654	245.263	7.92133	2161.59	1940.67	536.235	2.61257	3.96383
582	2020	7	25	18	205.75	2020.56	18.098	32.852	290.85	8.00679	2195.81	1990.28	429.939	2.3049	3.57798	27.0686	32.112	245.413	7.92524	2163.66	1940.12	530.817	2.63952	4.00376
583	2020	7	25	19	205.792	2020.56	18.087	32.8561	287.419	7.99779	2196.06	1994.71	440.492	2.26495	3.51602	27.0829	32.1401	244.692	7.92815	2164.91	1939.57	526.78	2.65789	4.03115
584	2020	7	25	20	205.833	2020.56	18.0739	32.8593	284.804	7.99679	2196.26	1995.43	441.701	2.25987	3.50822	27.076	32.1648	245.092	7.93306	2166.01	1938.06	519.904	2.68407	4.07067
585	2020	7	25	21	205.875	2020.56	17.9487	32.9791	286.48	8.00579	2203.69	1998.42	432.207	2.30121	3.57252	27.0596	32.1694	244.38	7.93497	2166.22	1937.39	517.228	2.69254	4.08368
586	2020	7	25	22	205.917	2020.56	18.057	32.9437	294.521	8.02779	2201.5	1985.47	407.034	2.40533	3.73349	27.0329	32.1701	243.747	7.93288	2166.25	1938.64	520.212	2.6796	4.06439
587	2020	7	25	23	205.958	2020.56	18.0657	32.8794	289.881	8.02479	2197.51	1983.5	409.806	2.38567	3.70342	26.97	32.1961	245.766	7.92979	2167.4	1941.53	524.812	2.66067	4.03619
588	2020	7	26	0	206	2020.56	18.091	32.8884	288.65	8.01979	2198.07	1986.15	415.457	2.36608	3.67271	26.9068	32.208	246.334	7.9257	2167.93	1944.42	530.808	2.63557	3.99878
589	2020	7	26	1	206.042	2020.56	18.068	32.8962	284.524	8.00779	2198.55	1992.33	429.173	2.31136	3.58791	26.8628	32.2072	245.558	7.92461	2167.9	1945.24	532.401	2.62604	3.98487
590	2020	7	26	2	206.083	2020.56	17.9159	32.9521	284.972	8.01679	2202.02	1992.11	419.36	2.3447	3.64054	26.838	32.2058	245.008	7.92552	2167.84	1944.92	531.083	2.6281	3.98832
591	2020	7	26	3	206.125	2020.56	17.889	32.9619	282.671	8.00979	2202.63	1996.08	427.42	2.31231	3.59041	26.8175	32.2201	245.64	7.92743	2168.47	1944.63	528.418	2.63694	4.00185
592	2020	7	26	4	206.167	2020.56	17.8699	33.0108	279.521	7.99179	2205.66	2007.05	449.018	2.23695	3.47317	26.7889	32.2367	246.339	7.92734	2169.21	1945.46	528.661	2.63536	3.99964
593	2020	7	26	5	206.208	2020.56	17.868	33.0181	270.879	7.98079	2206.11	2012.43	462.484	2.19044	3.40093	26.7674	32.243	246.538	7.92725	2169.49	1945.88	528.838	2.6335	3.99701
594	2020	7	26	6	206.25	2020.57	17.8615	33.0231	271.12	7.99579	2206.42	2005.93	444.346	2.2548	3.50088	26.7509	32.2442	246.195	7.92816	2169.54	1945.6	527.54	2.63658	4.00188
595	2020	7	26	7	206.292	2020.57	17.8612	33.0151	273.677	7.99679	2205.93	2005.05	443.083	2.25834	3.50643	26.7503	32.2481	245.691	7.92807	2169.72	1945.78	527.694	2.63644	4.00163
596	2020	7	26	8	206.333	2020.57	17.8692	33.0184	272.674	8.00079	2206.13	2003.33	438.389	2.27675	3.53492	26.7601	32.2441	243.855	7.92498	2169.54	1947.08	532.132	2.62173	3.97923
597	2020	7	26	9	206.375	2020.57	17.6533	33.1944	276.44	8.00079	2217.05	2014.04	439.944	2.27689	3.53562	26.775	32.2292	244.352	7.92489	2168.88	1946.5	532.164	2.62131	3.97856
598	2020	7	26	10	206.417	2020.57	17.4838	33.3363	279.405	8.00479	2225.85	2020.8	436.491	2.29488	3.56393	26.8149	32.2141	244.783	7.9258	2168.21	1945.24	530.735	2.62811	3.98854
599	2020	7	26	11	206.458	2020.57	17.3606	33.2676	283.549	8.00979	2221.59	2015.75	430.028	2.30016	3.57368	26.8672	32.2101	245.382	7.92571	2168.03	1944.77	530.82	2.63215	3.99406
600	2020	7	26	12	206.5	2020.57	17.5322	33.2243	289.451	8.01779	2218.9	2008.53	420.533	2.3454	3.64282	26.883	32.2216	246.478	7.92662	2168.54	1944.61	529.567	2.63917	4.0044
601	2020	7	26	13	206.542	2020.57	17.482	33.0696	290.499	8.01779	2209.31	2000.83	419.177	2.32559	3.61368	26.8788	32.2389	246.209	7.92153	2169.31	1947.74	537.08	2.61525	3.96798
602	2020	7	26	14	206.583	2020.57	17.7569	33.0489	287.69	8.01679	2208.02	1998.28	420.177	2.34152	3.63623	26.851	32.2491	245.155	7.89044	2169.76	1963.19	584.428	2.4643	3.73918
603	2020	7	26	15	206.625	2020.57	18.0002	33.0896	289.469	8.02479	2210.55	1994.86	411.581	2.4021	3.72779	26.8309	32.2491	243.459	7.88435	2169.76	1966.19	594.115	2.4341	3.69359
604	2020	7	26	16	206.667	2020.57	17.8852	33.069	290.192	8.02479	2209.27	1994.63	411.394	2.39033	3.71072	26.7748	32.2473	245.545	7.87827	2169.68	1969.33	603.934	2.40095	3.64394
605	2020	7	26	17	206.708	2020.57	17.889	33.0964	285.374	8.01279	2210.97	2001.69	425.168	2.33931	3.63127	26.5564	32.2686	253.059	7.87518	2170.63	1972.99	609.147	2.36993	3.5991
606	2020	7	26	18	206.75	2020.57	17.8709	33.1282	281.044	8.01279	2212.94	2003.47	425.445	2.34106	3.63389	26.4828	32.3001	255.042	7.87809	2172.03	1973.28	604.637	2.37955	3.61424
607	2020	7	26	19	206.792	2020.57	17.7774	33.1903	284.101	8.01379	2216.79	2006.9	424.83	2.34417	3.63905	26.5617	32.3416	253.303	7.881	2173.88	1972.88	600.217	2.40313	3.64876
608	2020	7	26	20	206.833	2020.57	17.8439	32.9943	290.454	8.02279	2204.64	1991.99	412.979	2.37008	3.68025	26.6415	32.3789	252.283	7.88191	2175.54	1973.25	599.008	2.41735	3.66911
609	2020	7	26	21	206.875	2020.57	17.874	32.852	282.964	8.00779	2195.81	1991.38	428.74	2.29118	3.5586	26.6069	32.4017	251.198	7.88282	2176.55	1973.87	597.709	2.4205	3.67406
610	2020	7	26	22	206.917	2020.57	17.941	32.8459	283.186	8.01479	2195.43	1987.35	420.702	2.32696	3.61364	26.5239	32.4138	248.796	7.88473	2177.09	1973.98	594.739	2.42318	3.67897
611	2020	7	26	23	206.958	2020.57	17.962	32.7556	283.299	8.01679	2189.83	1981.57	417.662	2.32834	3.61633	26.4389	32.4327	246.714	7.88764	2177.93	1973.87	590.239	2.43091	3.69149
612	2020	7	27	0	207	2020.57	17.989	32.7088	280.944	8.01479	2186.93	1979.87	419.514	2.31687	3.59867	26.341	32.455	247.283	7.88855	2178.92	1974.91	588.965	2.42853	3.68878
613	2020	7	27	1	207.042	2020.57	17.978	32.7101	277.805	8.00179	2187.01	1986	434.438	2.25908	3.50899	26.2821	32.4801	246.369	7.86746	2180.04	1985.96	623.497	2.32937	3.53859
614	2020	7	27	2	207.083	2020.57	17.9519	32.6243	277.351	8.01079	2181.69	1977.58	423.3	2.28763	3.55426	26.2448	32.5119	246.041	7.86837	2181.45	1986.93	622.219	2.33293	3.54412
615	2020	7	27	3	207.125	2020.57	17.9256	32.6624	275.505	8.00279	2184.05	1983.41	432.831	2.25448	3.50266	26.2549	32.5242	245.277	7.86528	2182	1988.72	627.485	2.32092	3.52567
616	2020	7	27	4	207.167	2020.57	17.9017	32.7621	272.68	7.99779	2190.23	1991.07	439.58	2.24087	3.48093	26.244	32.546	245.335	7.86319	2182.97	1990.53	631.173	2.31244	3.51272
617	2020	7	27	5	207.208	2020.57	17.8963	32.7931	270.102	7.99379	2192.16	1994.54	444.6	2.22628	3.45807	26.2288	32.5601	244.754	7.8611	2183.6	1992.09	634.82	2.30301	3.49843
618	2020	7	27	6	207.25	2020.57	17.8669	32.828	271.751	7.99779	2194.32	1994.76	440.176	2.24463	3.48654	26.208	32.5691	244.537	7.86301	2184	1991.68	631.653	2.31052	3.50998
619	2020	7	27	7	207.292	2020.57	17.8718	33.0322	268.158	7.99179	2206.99	2008.16	449.22	2.23919	3.47648	26.202	32.5778	244.714	7.86392	2184.39	1991.62	630.184	2.31478	3.51645
620	2020	7	27	8	207.333	2020.57	17.8948	33.0411	275.033	8.00079	2207.54	2004.34	438.602	2.28107	3.54123	26.1529	32.5951	244.338	7.86583	2185.16	1991.7	627.101	2.32063	3.52571
621	2020	7	27	9	207.375	2020.57	17.899	33.0954	273.701	7.99979	2210.91	2007.61	440.279	2.28242	3.54289	26.0948	32.6222	243.809	7.85674	2186.36	1997.19	642.738	2.27764	3.46078
622	2020	7	27	10	207.417	2020.57	17.8869	33.1403	274.801	7.99879	2213.69	2010.51	441.871	2.28152	3.54125	26.1349	32.6366	244.505	7.85565	2187	1997.94	644.73	2.27727	3.45968
623	2020	7	27	11	207.458	2020.57	17.8837	32.9331	280.929	8.00679	2200.84	1996.01	430.621	2.29573	3.56493	26.1678	32.6525	245.33	7.85456	2187.71	1998.79	646.739	2.27644	3.45792
624	2020	7	27	12	207.5	2020.57	17.9925	32.6769	280.499	8.00679	2184.95	1981.88	428.352	2.2787	3.53961	26.134	32.6691	247.152	7.85547	2188.45	1999.2	645.299	2.27899	3.46202
625	2020	7	27	13	207.542	2020.57	18.0889	32.5871	278.997	8.00379	2179.38	1977.89	431.031	2.2643	3.51716	26.2789	32.5729	247.668	7.85738	2184.17	1993.91	641.267	2.29168	3.48057
626	2020	7	27	14	207.583	2020.57										26.063	32.4917	258.212	7.88729	2180.56	1978.7	591.254	2.40184	3.65102
627	2020	7	27	15	207.625	2020.57										25.8789	32.5487	258.903	7.8982	2183.09	1976.89	574.543	2.44123	3.71246
628	2020	7	27	16	207.667	2020.57										25.7949	32.5451	258.475	7.91111	2182.93	1971.23	554.835	2.49418	3.79399
629	2020	7	27	17	207.708	2020.57										25.8459	32.5211	258.127	7.91902	2181.86	1966.23	542.903	2.53432	3.85468
630	2020	7	27	18	207.75	2020.57										25.7829	32.563	258.148	7.92793	2183.73	1963.84	530.201	2.57534	3.91741
631	2020	7	27	19	207.792	2020.57										25.7847	32.5732	257.802	7.93684	2184.18	1959.82	517.552	2.61997	3.98518
632	2020	7	27	20	207.833	2020.57										26.0456	32.6068	253.165	7.90575	2185.68	1974.21	563.304	2.49631	3.79376
633	2020	7	27	21	207.875	2020.57										26.2596	32.6984	250.732	7.88866	2189.75	1984.09	590.526	2.44258	3.70883
634	2020	7	27	22	207.917	2020.57										26.2716	32.7201	249.659	7.88057	2190.72	1988.58	603.691	2.40793	3.65589
635	2020	7	27	23	207.958	2020.57										26.159	32.7361	250.228	7.87748	2191.43	1991.36	608.854	2.38542	3.62283
636	2020	7	28	0	208	2020.57										26.094	32.673	250.34	7.87739	2188.62	1989.58	608.536	2.37426	3.60715
637	2020	7	28	1	208.042	2020.57										25.9939	32.7251	250.285	7.8753	2190.94	1993.09	612.352	2.36056	3.58698
638	2020	7	28	2	208.083	2020.57										25.9346	32.7651	251.887	7.87321	2192.72	1995.89	616.097	2.34936	3.57027
639	2020	7	28	3	208.125	2020.57										25.9089	32.782	252.81	7.87312	2193.47	1996.71	616.373	2.34817	3.5686
640	2020	7	28	4	208.167	2020.57										25.881	32.8125	252.608	7.87303	2194.83	1998.04	616.752	2.3479	3.56823
641	2020	7	28	5	208.208	2020.57										25.8828	32.8101	251.089	7.87094	2194.72	1998.9	620.198	2.33843	3.55384
642	2020	7	28	6	208.25	2020.57										25.7819	32.825	251.779	7.87085	2195.38	2000.16	620.458	2.33078	3.54318
643	2020	7	28	7	208.292	2020.57										25.7079	32.8422	250.954	7.86976	2196.15	2001.77	622.4	2.32111	3.52913
644	2020	7	28	8	208.333	2020.57										25.678	32.8296	248.973	7.87067	2195.59	2001.1	620.787	2.32168	3.53042
645	2020	7	28	9	208.375	2020.57										25.6841	32.8141	250.299	7.87258	2194.9	1999.62	617.502	2.3295	3.54237
646	2020	7	28	10	208.417	2020.57										25.7099	32.8326	252.204	7.87449	2195.72	1999.24	614.491	2.34175	3.56057
647	2020	7	28	11	208.458	2020.57										25.7	32.8517	251.91	7.8734	2196.57	2000.49	616.433	2.33756	3.55414
648	2020	7	28	12	208.5	2020.57										25.7299	32.8672	251.745	7.85231	2197.26	2010.45	652.297	2.2478	3.41723
649	2020	7	28	13	208.542	2020.57										25.5607	32.7661	258.409	7.87222	2192.76	1998.88	617.724	2.31374	3.52013
650	2020	7	28	14	208.583	2020.57										25.4099	32.5481	258.929	7.88713	2183.06	1985.22	591.934	2.35032	3.57929
651	2020	7	28	15	208.625	2020.57										25.3257	32.4731	263.906	7.90604	2179.73	1974.33	562.067	2.42331	3.69206
652	2020	7	28	16	208.667	2020.57										25.1151	32.6359	267.064	7.90495	2186.97	1982.09	564.85	2.4139	3.67857
653	2020	7	28	17	208.708	2020.57										25.021	32.5749	265.655	7.90386	2184.26	1981.07	566.097	2.39571	3.65242
654	2020	7	28	18	208.75	2020.57										25.1462	32.5913	260.824	7.89877	2184.99	1983.17	574.013	2.38446	3.63377
655	2020	7	28	19	208.792	2020.57										25.4998	32.6581	254.202	7.88668	2187.96	1988.76	593.445	2.36493	3.59961
656	2020	7	28	20	208.833	2020.57										25.739	32.7072	250.796	7.87759	2190.14	1993.11	608.464	2.34798	3.57079
657	2020	7	28	21	208.875	2020.57										25.8548	32.7222	249.144	7.87251	2190.81	1995.21	616.939	2.33598	3.55117
658	2020	7	28	22	208.917	2020.57										25.9229	32.7199	248.496	7.87242	2190.71	1994.71	617.07	2.3411	3.55823
659	2020	7	28	23	208.958	2020.57										25.879	32.7231	251.89	7.87433	2190.85	1994.24	613.942	2.34629	3.56657
660	2020	7	29	0	209	2020.57										25.796	32.7434	253.388	7.87324	2191.75	1996.03	615.891	2.33606	3.55175
661	2020	7	29	1	209.042	2020.57										25.7579	32.741	252.648	7.87315	2191.65	1996.24	616.02	2.33228	3.54642
662	2020	7	29	2	209.083	2020.57										25.6851	32.7638	254.103	7.87706	2192.66	1995.75	609.767	2.34563	3.56732
663	2020	7	29	3	209.125	2020.57										25.5987	32.7991	255.886	7.87997	2194.23	1996.26	605.287	2.3544	3.58129
664	2020	7	29	4	209.167	2020.57										25.533	32.8203	256.21	7.88588	2195.18	1994.72	595.915	2.37743	3.61686
665	2020	7	29	5	209.208	2020.57										25.4541	32.8381	257.362	7.87179	2195.97	2002.39	618.989	2.30874	3.51305
666	2020	7	29	6	209.25	2020.57										25.381	32.8343	259.542	7.8747	2195.8	2001.41	614.153	2.31535	3.52392
667	2020	7	29	7	209.292	2020.57										25.3327	32.841	260.582	7.87161	2196.1	2003.39	619.298	2.29813	3.49817
668	2020	7	29	8	209.333	2020.57										25.2989	32.8392	260.86	7.86952	2196.02	2004.5	622.749	2.28595	3.47999
669	2020	7	29	9	209.375	2020.57										25.2342	32.8572	262.875	7.86843	2196.82	2006.07	624.697	2.27727	3.4673
670	2020	7	29	10	209.417	2020.57										25.227	32.869	263.037	7.86734	2197.34	2007.04	626.608	2.27282	3.4605
671	2020	7	29	11	209.458	2020.57										25.2519	32.8701	262.258	7.86725	2197.39	2006.96	626.771	2.27454	3.46286
672	2020	7	29	12	209.5	2020.57										25.25	32.8744	261.6	7.87016	2197.58	2005.8	621.95	2.28757	3.48268
673	2020	7	29	13	209.542	2020.57										25.3413	32.9065	260.829	7.88207	2199.01	2000.88	602.677	2.35099	3.57799
674	2020	7	29	14	209.583	2020.57										25.5322	32.9035	259.566	7.89698	2198.88	1992.5	578.963	2.43541	3.70436
675	2020	7	29	15	209.625	2020.57										25.5888	32.8884	258.438	7.88304	2198.2	1998.1	600.966	2.37485	3.61175
676	2020	7	29	16	209.667	2020.57										25.5267	32.8781	258.273	7.88311	2197.75	1998.12	600.785	2.36904	3.60368
677	2020	7	29	17	209.708	2020.57										25.464	32.8227	261.481	7.89218	2195.28	1992.34	585.929	2.40059	3.65284
678	2020	7	29	18	209.75	2020.57										25.4517	32.8087	262.257	7.90324	2194.66	1986.72	568.621	2.44963	3.72772
679	2020	7	29	19	209.792	2020.57										25.4986	32.8099	262.796	7.91331	2194.71	1981.63	553.361	2.50125	3.80573
680	2020	7	29	20	209.833	2020.57										25.5459	32.7921	261.364	7.91637	2193.92	1979.19	548.658	2.51851	3.8316
681	2020	7	29	21	209.875	2020.58										25.532	32.8092	262.881	7.92144	2194.68	1977.45	541.287	2.54303	3.86891
682	2020	7	29	22	209.917	2020.58										25.6232	32.8054	261.037	7.9275	2194.51	1973.71	532.391	2.58028	3.92454
683	2020	7	29	23	209.958	2020.58										25.713	32.8035	258.538	7.92957	2194.43	1971.98	529.367	2.59838	3.951
684	2020	7	30	0	210	2020.58										25.7657	32.7862	255.293	7.92964	2193.66	1970.96	529.146	2.60198	3.956
685	2020	7	30	1	210.042	2020.58										25.777	32.7701	252.65	7.9277	2192.94	1971.26	531.835	2.59212	3.94102
686	2020	7	30	2	210.083	2020.58										25.806	32.7582	254.002	7.93077	2192.41	1969.13	527.33	2.60872	3.96603
687	2020	7	30	3	210.125	2020.58										25.8279	32.7435	253.595	7.93483	2191.76	1966.45	521.421	2.62943	3.99739
688	2020	7	30	4	210.167	2020.58										25.8319	32.7324	252.035	7.9209	2191.26	1972.86	541.503	2.5607	3.89296
689	2020	7	30	5	210.208	2020.58										25.822	32.7184	251.536	7.91996	2190.64	1972.89	542.79	2.55406	3.88312
690	2020	7	30	6	210.25	2020.58										25.813	32.6908	253.365	7.92103	2189.41	1971.47	541.047	2.55597	3.88638
691	2020	7	30	7	210.292	2020.58										25.8161	32.6603	254.693	7.9201	2188.06	1970.83	542.224	2.54905	3.87612
692	2020	7	30	8	210.333	2020.58										25.825	32.6352	255.194	7.91916	2186.94	1970.33	543.436	2.54315	3.86728
693	2020	7	30	9	210.375	2020.58										25.8406	32.5997	255.011	7.91823	2185.36	1969.42	544.581	2.53695	3.85799
694	2020	7	30	10	210.417	2020.58										25.9051	32.5732	255.218	7.91629	2184.18	1968.96	547.256	2.53113	3.84863
695	2020	7	30	11	210.458	2020.58										25.9799	32.5657	254.928	7.91536	2183.85	1968.62	548.576	2.53269	3.85021
696	2020	7	30	12	210.5	2020.58										26.0043	32.5577	255.025	7.91542	2183.49	1968.13	548.42	2.53449	3.85274
697	2020	7	30	13	210.542	2020.58										26.0399	32.5437	255.154	7.91749	2182.87	1966.39	545.254	2.54639	3.87053
698	2020	7	30	14	210.583	2020.58										26.0966	32.5191	254.282	7.92056	2181.77	1963.64	540.558	2.56413	3.89706
699	2020	7	30	15	210.625	2020.58										26.1644	32.4797	253.269	7.92262	2180.02	1960.76	537.26	2.5768	3.91588
700	2020	7	30	16	210.667	2020.58										26.181	32.4421	252.749	7.92569	2178.35	1957.83	532.557	2.58987	3.93592
701	2020	7	30	17	210.708	2020.58										26.1999	32.4138	251.773	7.92875	2177.09	1955.21	527.947	2.60404	3.9575
702	2020	7	30	18	210.75	2020.58										26.2396	32.393	250.485	7.93282	2176.16	1952.2	521.986	2.62579	3.99028
703	2020	7	30	19	210.792	2020.58										26.261	32.3436	245.141	7.92989	2173.97	1951.76	525.868	2.60885	3.96477
704	2020	7	30	20	210.833	2020.58										26.3219	32.3207	246.572	7.93795	2172.95	1946.56	514.258	2.65221	4.03014
705	2020	7	30	21	210.875	2020.58										26.3632	32.3132	247.594	7.94302	2172.61	1943.49	507.121	2.68064	4.07291
706	2020	7	30	22	210.917	2020.58										26.3838	32.3018	248.578	7.94608	2172.11	1941.41	502.806	2.69691	4.09749
707	2020	7	30	23	210.958	2020.58										26.3973	32.2871	248.716	7.94715	2171.45	1940.27	501.248	2.70218	4.10548
708	2020	7	31	0	211	2020.58										26.397	32.2651	247.954	7.94521	2170.47	1940.48	503.785	2.69036	4.08776
709	2020	7	31	1	211.042	2020.58										26.4029	32.2401	247.186	7.94228	2169.36	1941.02	507.698	2.6739	4.06293
710	2020	7	31	2	211.083	2020.58										26.4109	32.2107	248.764	7.94135	2168.05	1940.4	508.822	2.66725	4.05304
711	2020	7	31	3	211.125	2020.58										26.4019	32.0492	248.587	7.94141	2160.87	1934.82	507.787	2.65176	4.03132
712	2020	7	31	4	211.167	2020.58										26.4066	31.965	248.831	7.94148	2157.12	1931.82	507.201	2.64472	4.02144
713	2020	7	31	5	211.208	2020.58										26.4188	32.0298	249.253	7.93854	2160.01	1935.43	511.661	2.63734	4.00938
714	2020	7	31	6	211.25	2020.58										26.4281	32.0432	249.235	7.93761	2160.6	1936.29	513.044	2.63482	4.0053
715	2020	7	31	7	211.292	2020.58										26.4389	31.979	248.561	7.93767	2157.75	1933.94	512.568	2.63022	3.99886
716	2020	7	31	8	211.333	2020.58										26.4573	31.9829	249.644	7.93774	2157.92	1933.91	512.491	2.63261	4.00222
717	2020	7	31	9	211.375	2020.58										26.4769	31.9808	250.155	7.93881	2157.83	1933.17	510.981	2.6395	4.01247
718	2020	7	31	10	211.417	2020.58										26.4989	31.9657	251.018	7.94087	2157.15	1931.47	508.007	2.65038	4.02889
719	2020	7	31	11	211.458	2020.58										26.5519	31.9539	251.308	7.94294	2156.63	1929.66	505.054	2.66449	4.04982
720	2020	7	31	12	211.5	2020.58										26.555	31.929	251.798	7.948	2155.52	1926.28	497.953	2.68776	4.08542
721	2020	7	31	13	211.542	2020.58										26.3328	31.8262	257.905	7.96007	2150.95	1918.36	481.279	2.71769	4.13487
722	2020	7	31	14	211.583	2020.58										26.4119	31.8178	254.291	7.96013	2150.57	1917.45	481.108	2.72475	4.1447
723	2020	7	31	15	211.625	2020.58										26.5669	31.8047	252.654	7.9632	2149.99	1914.32	476.92	2.75391	4.18721
724	2020	7	31	16	211.667	2020.58										26.322	31.6892	257.58	7.98127	2144.85	1903.07	453.288	2.81178	4.27977
725	2020	7	31	17	211.708	2020.58										26.1632	31.6399	256.873	7.98733	2142.66	1899.5	445.596	2.82282	4.29924
726	2020	7	31	18	211.75	2020.58										26.1449	31.6024	257.528	7.9684	2140.99	1907.88	469.289	2.72042	4.14394
727	2020	7	31	19	211.792	2020.58										26.1772	31.5649	256.766	7.97546	2139.32	1902.82	460.043	2.75572	4.19774
728	2020	7	31	20	211.833	2020.58										26.2224	31.559	253.648	7.97453	2139.06	1902.75	461.175	2.75473	4.19572
729	2020	7	31	21	211.875	2020.58										26.4096	31.6057	249.767	7.96759	2141.14	1906.44	470.213	2.74194	4.17331
730	2020	7	31	22	211.917	2020.58										26.5636	31.654	246.995	7.96166	2143.29	1909.93	478.132	2.73122	4.15447
731	2020	7	31	23	211.958	2020.58										26.6304	31.6591	245.321	7.95673	2143.51	1912.06	484.653	2.71313	4.12604
732	2020	8	1	0	212	2020.58										26.6699	31.6801	245.372	7.95379	2144.45	1913.95	488.67	2.7041	4.11158
733	2020	8	1	1	212.042	2020.58										26.6769	31.7107	247.037	7.94986	2145.81	1916.91	494.14	2.68792	4.08655
734	2020	8	1	2	212.083	2020.58										26.657	31.7589	248.619	7.94792	2147.95	1919.67	497.048	2.68093	4.07562
735	2020	8	1	3	212.125	2020.58										26.6319	31.7781	249.58	7.94799	2148.81	1920.49	497.079	2.68071	4.07539
736	2020	8	1	4	212.167	2020.58										26.5958	31.7903	249.696	7.94705	2149.35	1921.64	498.438	2.6738	4.0652
737	2020	8	1	5	212.208	2020.58										26.576	31.7916	247.826	7.94312	2149.41	1923.76	503.851	2.65249	4.03304
738	2020	8	1	6	212.25	2020.58										26.5329	31.8002	249.365	7.94019	2149.79	1925.8	507.977	2.63477	4.00653
739	2020	8	1	7	212.292	2020.58										26.5579	31.8147	250.837	7.94025	2150.44	1926.1	507.96	2.63876	4.01214
740	2020	8	1	8	212.333	2020.58										26.5857	31.8222	250.417	7.93932	2150.77	1926.61	509.291	2.63743	4.00968
741	2020	8	1	9	212.375	2020.58										26.6113	31.8568	251.69	7.93838	2152.31	1928.09	510.786	2.6384	4.01048
742	2020	8	1	10	212.417	2020.58										26.6331	31.8999	252.473	7.94045	2154.23	1928.42	508.152	2.65468	4.03447
743	2020	8	1	11	212.458	2020.58										26.653	31.9052	250.294	7.94052	2154.46	1928.43	508.083	2.65736	4.03824
744	2020	8	1	12	212.5	2020.58										26.68	31.8981	249.058	7.94158	2154.15	1927.46	506.551	2.66452	4.04887
745	2020	8	1	13	212.542	2020.58										26.7289	31.9082	249.679	7.94865	2154.6	1923.96	496.874	2.70548	4.11037
746	2020	8	1	14	212.583	2020.58										26.7517	31.9134	248.794	7.95371	2154.83	1921.45	490.03	2.73377	4.153
747	2020	8	1	15	212.625	2020.58										26.7431	31.9092	247.432	7.95878	2154.64	1918.83	483.234	2.75835	4.19051
748	2020	8	1	16	212.667	2020.58										26.786	31.9421	248.445	7.96884	2156.1	1914.55	470.161	2.8176	4.27957
749	2020	8	1	17	212.708	2020.58										26.7971	31.9431	247.138	7.96991	2156.15	1913.95	468.778	2.82433	4.28964
750	2020	8	1	18	212.75	2020.58										26.872	31.976	246.482	7.97598	2157.61	1911.4	461.104	2.86674	4.35264
751	2020	8	1	19	212.792	2020.58										26.9269	32.0281	246.871	7.94604	2159.93	1927.96	501.023	2.7225	4.13237
752	2020	8	1	20	212.833	2020.58										26.9039	32.0682	247.541	7.95011	2161.71	1927.48	495.699	2.74478	4.16604
753	2020	8	1	21	212.875	2020.58										26.8748	32.0968	248.462	7.95117	2162.99	1928.14	494.425	2.75015	4.17425
754	2020	8	1	22	212.917	2020.58										26.8533	32.1045	247.002	7.95024	2163.33	1929.04	495.751	2.74405	4.16519
755	2020	8	1	23	212.958	2020.58										26.8348	32.1061	245.633	7.9483	2163.4	1930.2	498.411	2.73259	4.14801
756	2020	8	2	0	213	2020.58										26.8179	32.1087	246.236	7.94837	2163.52	1930.38	498.344	2.73155	4.14663
757	2020	8	2	1	213.042	2020.58										26.8108	32.0921	245.685	7.94644	2162.78	1930.83	500.906	2.71949	4.1286
758	2020	8	2	2	213.083	2020.58										26.8179	32.0901	248.577	7.9475	2162.69	1930.17	499.428	2.72538	4.13746
759	2020	8	2	3	213.125	2020.58										26.7774	32.1233	250.141	7.94757	2164.17	1931.59	499.548	2.72499	4.13704
760	2020	8	2	4	213.167	2020.58										26.7209	32.1562	251.323	7.94663	2165.63	1933.61	501.047	2.71799	4.12677
761	2020	8	2	5	213.208	2020.58										26.6662	32.1676	251.047	7.9457	2166.14	1934.87	502.425	2.70914	4.11391
762	2020	8	2	6	213.25	2020.58										26.6049	32.1694	251.534	7.94676	2166.22	1934.86	500.999	2.70887	4.11426
763	2020	8	2	7	213.292	2020.58										26.6035	32.1703	252.559	7.94683	2166.26	1934.87	500.914	2.70916	4.1147
764	2020	8	2	8	213.333	2020.58										26.6422	32.1757	251.812	7.9459	2166.5	1935.23	502.212	2.70862	4.11334
765	2020	8	2	9	213.375	2020.58										26.6959	32.1715	250.587	7.94196	2166.31	1936.65	507.605	2.6935	4.08974
766	2020	8	2	10	213.417	2020.58										26.7423	32.1742	250.489	7.94203	2166.43	1936.37	507.507	2.69847	4.09666
767	2020	8	2	11	213.458	2020.58										26.7825	32.1726	248.193	7.93909	2166.36	1937.48	511.574	2.68737	4.07932
768	2020	8	2	12	213.5	2020.58										26.852	32.1741	248.453	7.94016	2166.43	1936.49	510.059	2.69943	4.09674
769	2020	8	2	13	213.542	2020.59										26.9216	32.1676	248.857	7.94122	2166.14	1935.23	508.499	2.7108	4.11317
770	2020	8	2	14	213.583	2020.59										26.9929	32.1587	248.293	7.94229	2165.74	1933.86	506.927	2.72214	4.12955
771	2020	8	2	15	213.625	2020.59										27.035	32.1476	248.624	7.94436	2165.25	1932.13	503.976	2.7356	4.14955
772	2020	8	2	16	213.667	2020.59										27.0549	32.1242	248.302	7.94742	2164.21	1929.64	499.606	2.75092	4.17279
773	2020	8	2	17	213.708	2020.59										27.062	32.1112	246.716	7.94949	2163.63	1928.1	496.7	2.76093	4.18802
774	2020	8	2	18	213.75	2020.59										27.0858	32.1052	246.59	7.95255	2163.36	1926.17	492.481	2.7784	4.21427
775	2020	8	2	19	213.792	2020.59										27.1059	32.1032	246.091	7.95662	2163.27	1923.89	486.974	2.80116	4.24854
776	2020	8	2	20	213.833	2020.59										27.1205	32.094	245.194	7.96168	2162.86	1920.88	480.158	2.82802	4.2892
777	2020	8	2	21	213.875	2020.59										27.1485	32.0762	244.602	7.96575	2162.07	1917.97	474.683	2.85031	4.32283
778	2020	8	2	22	213.917	2020.59										27.1729	32.0622	244.03	7.96882	2161.45	1915.73	470.586	2.86747	4.34868
779	2020	8	2	23	213.958	2020.59										27.1829	32.0544	243.965	7.96988	2161.1	1914.84	469.152	2.87332	4.3575
780	2020	8	3	0	214	2020.59										27.1778	32.0352	244.458	7.96995	2160.25	1914.19	468.97	2.87125	4.35466
781	2020	8	3	1	214.042	2020.59										27.1699	32.011	244.029	7.97001	2159.17	1913.39	468.764	2.86842	4.35075
782	2020	8	3	2	214.083	2020.59										27.163	31.9872	243.686	7.97208	2158.11	1911.57	465.972	2.87627	4.36302
783	2020	8	3	3	214.125	2020.59										27.1595	31.9686	244.237	7.97515	2157.28	1909.38	461.938	2.89028	4.38455
784	2020	8	3	4	214.167	2020.59										27.1629	31.9549	244.751	7.97721	2156.67	1907.81	459.228	2.90021	4.39973
785	2020	8	3	5	214.208	2020.59										27.1742	31.946	244.956	7.97928	2156.28	1906.35	456.551	2.91145	4.41672
786	2020	8	3	6	214.25	2020.59										27.1998	31.9359	245.102	7.98034	2155.83	1905.26	455.134	2.91869	4.42748
787	2020	8	3	7	214.292	2020.59										27.221	31.9297	245.445	7.97941	2155.55	1905.37	456.27	2.91522	4.42199
788	2020	8	3	8	214.333	2020.59										27.2448	31.9271	245.684	7.97747	2155.44	1906.1	458.696	2.90705	4.4093
789	2020	8	3	9	214.375	2020.59										27.2565	31.9176	244.753	7.97054	2155.01	1909.27	467.539	2.87054	4.35387
790	2020	8	3	10	214.417	2020.59										27.2872	31.9005	245.564	7.96261	2154.25	1912.52	477.799	2.83028	4.29259
791	2020	8	3	11	214.458	2020.59										27.304	31.8892	245.619	7.93267	2153.75	1927.01	518.709	2.67785	4.06133
792	2020	8	3	12	214.5	2020.59										27.298	31.8771	246.004	7.93474	2153.21	1925.62	515.716	2.6865	4.07465
793	2020	8	3	13	214.542	2020.59										27.3779	31.8667	246.255	7.9358	2152.75	1924.15	514.112	2.69844	4.09184
794	2020	8	3	14	214.583	2020.59										27.4546	31.8504	246.154	7.93787	2152.02	1922	511.074	2.71461	4.11556
795	2020	8	3	15	214.625	2020.59										27.4842	31.8393	243.82	7.93093	2151.53	1924.83	520.797	2.68147	4.06507
796	2020	8	3	16	214.667	2020.59										27.4423	31.8731	248.983	7.949	2153.03	1917.31	495.814	2.77233	4.20297
797	2020	8	3	17	214.708	2020.59										27.415	31.8727	246.637	7.94807	2153.02	1917.97	497.104	2.76485	4.192
798	2020	8	3	18	214.75	2020.59										27.3969	31.8503	245.39	7.94713	2152.02	1917.8	498.268	2.75616	4.17931
799	2020	8	3	19	214.792	2020.59										27.3611	31.784	244.75	7.9492	2149.07	1914.75	495.095	2.75689	4.18164
800	2020	8	3	20	214.833	2020.59										27.3347	31.6934	244.943	7.95726	2145.04	1907.77	483.745	2.78694	4.22862
801	2020	8	3	21	214.875	2020.59										27.3674	31.6751	244.894	7.96033	2144.23	1905.36	479.555	2.80417	4.25455
802	2020	8	3	22	214.917	2020.59										27.4729	31.7351	245.46	7.96039	2146.89	1906.59	479.723	2.82076	4.27759
803	2020	8	3	23	214.958	2020.59										27.5033	31.7631	244.216	7.95846	2148.14	1908.3	482.423	2.81645	4.27031
804	2020	8	4	0	215	2020.59										27.5152	31.7693	243.132	7.95553	2148.42	1909.91	486.37	2.803	4.24969
805	2020	8	4	1	215.042	2020.59										27.5365	31.7631	242.482	7.95259	2148.14	1911.02	490.274	2.7893	4.22872
806	2020	8	4	2	215.083	2020.59										27.5398	31.7573	241.318	7.94966	2147.88	1912.27	494.217	2.77395	4.20547
807	2020	8	4	3	215.125	2020.59										27.5622	31.7534	240.926	7.94972	2147.71	1911.94	494.093	2.77609	4.20846
808	2020	8	4	4	215.167	2020.59										27.5909	31.7547	240.898	7.94979	2147.77	1911.74	493.994	2.77934	4.21299
809	2020	8	4	5	215.208	2020.59										27.617	31.7586	242.983	7.95085	2147.94	1911.14	492.552	2.78775	4.22535
810	2020	8	4	6	215.25	2020.59										27.6189	31.7642	244.695	7.95192	2148.19	1910.78	491.137	2.79399	4.2347
811	2020	8	4	7	215.292	2020.59										27.6322	31.7619	242.459	7.94899	2148.09	1912.08	495.103	2.77992	4.21324
812	2020	8	4	8	215.333	2020.59										27.6571	31.7554	242.002	7.94705	2147.8	1912.65	497.695	2.77177	4.20063
813	2020	8	4	9	215.375	2020.59										27.7099	31.7511	242.394	7.94412	2147.61	1913.58	501.674	2.76142	4.18429
814	2020	8	4	10	215.417	2020.59										27.7628	31.7461	243.644	7.94218	2147.38	1913.99	504.29	2.75615	4.17567
815	2020	8	4	11	215.458	2020.59										27.8388	31.7472	240.305	7.93225	2147.43	1918.41	518.199	2.71305	4.10936
816	2020	8	4	12	215.5	2020.59										27.8467	31.7211	244.816	7.94031	2146.27	1913.44	506.697	2.75229	4.169
817	2020	8	4	13	215.542	2020.59										27.8443	31.7121	243.943	7.94038	2145.87	1913.11	506.555	2.75153	4.16798
818	2020	8	4	14	215.583	2020.59										27.8902	31.7091	243.018	7.94145	2145.74	1912.14	505.029	2.76113	4.18195
819	2020	8	4	15	215.625	2020.59										27.9758	31.7039	244.353	7.94551	2145.51	1909.29	499.328	2.78985	4.22437
820	2020	8	4	16	215.667	2020.59										27.968	31.6992	243.192	7.94658	2145.3	1908.65	497.843	2.79414	4.23101
821	2020	8	4	17	215.708	2020.59										27.986	31.6962	242.493	7.94864	2145.16	1907.37	494.988	2.8063	4.24922
822	2020	8	4	18	215.75	2020.59										28.0149	31.7004	242.067	7.95171	2145.35	1905.75	490.824	2.82549	4.27784
823	2020	8	4	19	215.792	2020.59										28.0379	31.705	241.975	7.95478	2145.56	1904.17	486.695	2.84424	4.30586
824	2020	8	4	20	215.833	2020.59										28.0779	31.7044	241.16	7.95884	2145.53	1901.77	481.223	2.86953	4.34359
825	2020	8	4	21	215.875	2020.59										28.143	31.7	240.819	7.96091	2145.33	1900.07	478.409	2.88653	4.36847
826	2020	8	4	22	215.917	2020.59										28.211	31.6836	240.203	7.95997	2144.6	1899.48	479.514	2.88676	4.36807
827	2020	8	4	23	215.958	2020.59										28.2669	31.6565	239.505	7.95704	2143.4	1899.63	483.242	2.87413	4.3485
828	2020	8	5	0	216	2020.59										28.2813	31.6474	237.976	7.9541	2142.99	1900.72	487.122	2.8592	4.32582
829	2020	8	5	1	216.042	2020.59										28.2781	31.6498	238.033	7.95217	2143.1	1901.81	489.75	2.84895	4.31034
830	2020	8	5	2	216.083	2020.59										28.2719	31.6489	238.591	7.95224	2143.06	1901.79	489.66	2.84859	4.30989
831	2020	8	5	3	216.125	2020.59										28.257	31.6393	237.791	7.9513	2142.63	1902.05	490.884	2.84127	4.29913
832	2020	8	5	4	216.167	2020.59										28.2376	31.6344	239.616	7.95237	2142.41	1901.48	489.427	2.84444	4.30425
833	2020	8	5	5	216.208	2020.59										28.1803	31.6431	242.726	7.95643	2142.8	1900.14	484.041	2.86095	4.32993
834	2020	8	5	6	216.25	2020.59										28.1263	31.6471	244	7.9575	2142.98	1900.14	482.675	2.86157	4.33157
835	2020	8	5	7	216.292	2020.59										28.137	31.6434	241.635	7.95356	2142.81	1901.94	487.927	2.84162	4.30127
836	2020	8	5	8	216.333	2020.59										28.1676	31.6193	243.111	7.95163	2141.74	1901.87	490.389	2.83215	4.28681
837	2020	8	5	9	216.375	2020.59										28.1857	31.6205	243.852	7.9497	2141.8	1902.75	493.01	2.82397	4.27416
838	2020	8	5	10	216.417	2020.59										28.2058	31.626	243.408	7.94776	2142.04	1903.77	495.666	2.81643	4.2624
839	2020	8	5	11	216.458	2020.59										28.2291	31.6151	240.919	7.94483	2141.56	1904.7	499.618	2.80242	4.24101
840	2020	8	5	12	216.5	2020.59										28.2455	31.591	242.856	7.94889	2140.48	1901.7	493.903	2.82278	4.27189
841	2020	8	5	13	216.542	2020.59										28.2639	31.5728	242.834	7.95196	2139.67	1899.39	489.628	2.83879	4.2961
842	2020	8	5	14	216.583	2020.59										28.2954	31.5437	242.558	7.95302	2138.38	1897.62	488.011	2.8446	4.30481
843	2020	8	5	15	216.625	2020.59										28.4278	31.5505	242.757	7.95272	2138.68	1897.01	488.36	2.85688	4.32147
844	2020	8	5	16	216.667	2020.59										28.4424	31.5614	242.089	7.95342	2139.17	1896.91	487.464	2.86311	4.33055
845	2020	8	5	17	216.708	2020.59										28.43	31.559	236.285	7.95012	2139.06	1898.6	491.927	2.8443	4.30231
846	2020	8	5	18	216.75	2020.59										28.4729	31.5601	239.303	7.95082	2139.11	1897.96	490.953	2.85235	4.31388
847	2020	8	5	19	216.792	2020.59										28.4779	31.5291	238.573	7.95353	2137.73	1895.49	487.13	2.86395	4.33173
848	2020	8	5	20	216.833	2020.59										28.4505	31.4856	238.649	7.95623	2135.79	1892.84	483.292	2.87108	4.34343
849	2020	8	5	21	216.875	2020.59										28.4818	31.5338	241.012	7.95793	2137.94	1893.37	481.254	2.88805	4.36808
850	2020	8	5	22	216.917	2020.59										28.486	31.5509	239.17	7.95263	2138.7	1896.63	488.455	2.8622	4.32871
851	2020	8	5	23	216.958	2020.59										28.5328	31.5541	237.398	7.94933	2138.84	1898.07	492.917	2.84985	4.30933
852	2020	8	6	0	217	2020.59										28.5799	31.563	236.197	7.94603	2139.24	1899.7	497.447	2.83812	4.29084
853	2020	8	6	1	217.042	2020.59										28.5977	31.588	236.729	7.94473	2140.35	1901.08	499.362	2.83557	4.28643
854	2020	8	6	2	217.083	2020.59										28.5988	31.6108	236.086	7.94643	2141.36	1900.99	497.147	2.84684	4.30318
855	2020	8	6	3	217.125	2020.59										28.5866	31.6266	236.021	7.94713	2142.07	1901.27	496.28	2.85087	4.30925
856	2020	8	6	4	217.167	2020.59										28.5247	31.6478	238.791	7.95283	2143.01	1899.55	488.676	2.87683	4.34909
857	2020	8	6	5	217.208	2020.6										28.452	31.6666	241.028	7.95353	2143.85	1900.38	487.883	2.87512	4.3473
858	2020	8	6	6	217.25	2020.6										28.4165	31.6673	240.571	7.95223	2143.88	1901.34	489.67	2.86479	4.33216
859	2020	8	6	7	217.292	2020.6										28.3799	31.6633	241.894	7.95193	2143.7	1901.63	490.081	2.85916	4.3242
860	2020	8	6	8	217.333	2020.6										28.35	31.6821	243.046	7.94863	2144.54	1904.18	494.694	2.84073	4.29652
861	2020	8	6	9	217.375	2020.6										28.3807	31.6875	241.639	7.94333	2144.78	1906.82	501.993	2.81664	4.2596
862	2020	8	6	10	217.417	2020.6										28.413	31.6891	240.438	7.93903	2144.85	1908.8	507.966	2.79766	4.23043
863	2020	8	6	11	217.458	2020.6										28.4289	31.7002	241.216	7.93973	2145.34	1908.71	507.039	2.80393	4.23957	21.295	32.226		8.132	2148.46	1862.55	298.618	3.14045	4.84265
864	2020	8	6	12	217.5	2020.6										28.4439	31.698	238.767	7.93743	2145.24	1909.69	510.24	2.79327	4.22328	21.026	32.32		8.11288	2153.91	1879.5	315.853	3.01981	4.65888
865	2020	8	6	13	217.542	2020.6										28.4823	31.6932	238.245	7.93813	2145.03	1908.88	509.205	2.80019	4.23327	21.076	32.332		8.09977	2154.61	1886.69	327.739	2.95582	4.55942
866	2020	8	6	14	217.583	2020.6										28.569	31.6833	238.561	7.93683	2144.59	1908.56	510.918	2.801	4.23343	21.026	32.346		8.10565	2155.42	1884.59	322.483	2.98404	4.6034
867	2020	8	6	15	217.625	2020.6										28.6749	31.6991	239.406	7.93853	2145.29	1907.45	508.548	2.82181	4.26324	21.063	32.361		8.10654	2156.29	1884.5	321.751	2.99435	4.61869
868	2020	8	6	16	217.667	2020.6										28.681	31.7354	239.792	7.93923	2146.91	1908.3	507.767	2.82963	4.27454	22.609	31.956		8.14842	2132.81	1830.01	282.76	3.33815	5.13262
869	2020	8	6	17	217.708	2020.6										28.6159	31.7565	241.297	7.94193	2147.85	1908.14	504.16	2.83938	4.28991	22.761	31.913		8.1503	2130.32	1825.71	280.914	3.35986	5.1644
870	2020	8	6	18	217.75	2020.6										28.5352	31.7834	241.594	7.94463	2149.04	1908.29	500.62	2.84818	4.304	23.072	31.899		8.15019	2129.5	1822.45	280.698	3.39157	5.20881
871	2020	8	6	19	217.792	2020.6										28.486	31.792	240.432	7.94333	2149.43	1909.61	502.503	2.83733	4.28819	23.388	31.835		8.14907	2125.79	1817.5	281.039	3.4112	5.23516
872	2020	8	6	20	217.833	2020.6										28.4709	31.7855	237.967	7.94103	2149.14	1910.67	505.675	2.82318	4.26709	23.542	31.805		8.14895	2124.05	1814.9	280.864	3.42349	5.25214
873	2020	8	6	21	217.875	2020.6										28.5086	31.7656	236.707	7.94173	2148.25	1909.35	504.563	2.82861	4.275	23.122	31.883		8.14984	2128.58	1821.5	280.863	3.39285	5.21025
874	2020	8	6	22	217.917	2020.6										28.5829	31.7433	235.248	7.94343	2147.26	1907.17	502.025	2.84267	4.29549	23.082	31.882		8.14772	2128.52	1823.02	282.603	3.37588	5.18479
875	2020	8	6	23	217.958	2020.6										28.5614	31.729	236.428	7.94013	2146.62	1908.51	506.553	2.82188	4.26455	23.541	31.842		8.14361	2126.2	1819.62	285.401	3.39705	5.21108
876	2020	8	7	0	218	2020.6										28.589	31.7154	235.823	7.93983	2146.02	1907.99	506.876	2.82171	4.26407	23.635	31.826		8.14149	2125.27	1819.3	286.987	3.39284	5.20344
877	2020	8	7	1	218.042	2020.6										28.6089	31.7084	234.493	7.93853	2145.71	1908.26	508.644	2.81621	4.25558	23.18	31.927		8.15237	2131.13	1821.47	278.984	3.42037	5.25104
878	2020	8	7	2	218.083	2020.6										28.5793	31.7021	234.373	7.93623	2145.43	1909.43	511.862	2.80074	4.23268	23.204	31.838		8.13926	2125.97	1824.85	289.236	3.33393	5.11919
879	2020	8	7	3	218.125	2020.6										28.5518	31.7053	236.54	7.93993	2145.57	1907.87	506.704	2.81757	4.25845	21.835	32.204		8.11914	2147.19	1864.12	309.228	3.12236	4.80801
880	2020	8	7	4	218.167	2020.6										28.517	31.7031	238.409	7.94263	2145.47	1906.69	502.955	2.82799	4.27471	23.648	31.798		8.14202	2123.65	1817.65	286.398	3.39352	5.20469
881	2020	8	7	5	218.208	2020.6										28.5139	31.7	236.196	7.93933	2145.33	1908.28	507.538	2.8102	4.24789	22.935	31.924		8.11891	2130.95	1842.41	307.192	3.2001	4.91631
882	2020	8	7	6	218.25	2020.6										28.4804	31.7047	238.893	7.94203	2145.54	1907.32	503.822	2.82141	4.26524	23.217	31.898		8.13779	2129.45	1828.23	290.741	3.33509	5.11998
883	2020	8	7	7	218.292	2020.6										28.4054	31.7304	240.698	7.94473	2146.69	1907.39	500.275	2.83061	4.27987	23.213	31.842		8.13468	2126.2	1827.55	293.069	3.30895	5.08066
884	2020	8	7	8	218.333	2020.6										28.3499	31.74	240.618	7.94443	2147.11	1908.29	500.78	2.82451	4.27129	22.642	32.018		8.13756	2136.4	1838.65	291.971	3.28746	5.05341
885	2020	8	7	9	218.375	2020.6										28.3668	31.7097	238.239	7.93813	2145.76	1910.31	509.369	2.7905	4.22	22.715	32.062		8.13944	2138.95	1838.91	290.569	3.3122	5.08984
886	2020	8	7	10	218.417	2020.6										28.4511	31.6757	235.145	7.93283	2144.25	1911.17	516.603	2.76812	4.18542	22.59	32.069		8.14433	2139.36	1837.53	286.664	3.32779	5.11548
887	2020	8	7	11	218.458	2020.6										28.2514	31.6129	243.618	7.94153	2141.46	1906.12	504.15	2.78734	4.21793	22.306	32.132		8.13421	2143.01	1848.51	295.598	3.2474	4.99503
888	2020	8	7	12	218.5	2020.6										27.9251	31.579	248.198	7.95123	2139.95	1902.5	490.868	2.80223	4.24527	22.248	32.154		8.1401	2144.29	1846.67	290.831	3.27776	5.04225
889	2020	8	7	13	218.542	2020.6										27.75	31.5682	248.636	7.95993	2139.47	1899.03	479.273	2.82914	4.28855	22.016	32.187		8.12098	2146.2	1860.82	307.417	3.14927	4.84726
890	2020	8	7	14	218.583	2020.6										27.679	31.556	247.557	7.95363	2138.93	1902.33	487.657	2.78832	4.22776	21.548	32.309		8.11586	2153.28	1873.06	312.857	3.08797	4.75752
891	2020	8	7	15	218.625	2020.6										27.6374	31.5366	247.134	7.95433	2138.06	1901.62	486.637	2.78597	4.22499	21.085	32.476		8.09475	2162.96	1895.9	333.228	2.94751	4.5449
892	2020	8	7	16	218.667	2020.6										27.5789	31.5426	248.89	7.95803	2138.33	1900.4	481.765	2.79994	4.24689	20.486	32.595		8.10163	2169.86	1902.54	327.855	2.93919	4.53795
893	2020	8	7	17	218.708	2020.6										27.4839	31.5907	250.953	7.95573	2140.47	1903.91	485.146	2.78353	4.22269	20.093	32.715		8.09351	2176.82	1915.54	336.262	2.87221	4.43783
894	2020	8	7	18	218.75	2020.6										27.5652	31.6136	246.802	7.94443	2141.49	1909.75	500.549	2.73582	4.14898	19.612	32.818		8.1204	2182.79	1909.81	312.714	2.97971	4.60852
895	2020	8	7	19	218.792	2020.6										27.7965	31.5478	241.354	7.92813	2138.56	1913.83	522.917	2.66947	4.04615	20.163	32.714		8.09728	2176.76	1912.94	332.716	2.89868	4.47793
896	2020	8	7	20	218.833	2020.6										27.9376	31.4721	239.186	7.92283	2135.19	1912.77	530.028	2.64923	4.01455	19.377	32.879		8.12317	2186.32	1913.04	310.743	2.97857	4.60886
897	2020	8	7	21	218.875	2020.6										28.0389	31.4713	240.777	7.92553	2135.16	1910.7	526.074	2.67212	4.04793	20.055	32.761		8.10005	2179.48	1914.5	330.482	2.90829	4.49355
898	2020	8	7	22	218.917	2020.6										28.0672	31.468	238.535	7.92323	2135.01	1911.5	529.361	2.66301	4.0338	19.782	32.763		8.09593	2179.6	1918.98	334.419	2.86036	4.42256
899	2020	8	7	23	218.958	2020.6										28.0755	31.4616	236.766	7.91993	2134.73	1912.83	534.115	2.64679	4.00921	19.611	32.82		8.09982	2182.9	1920.93	331.23	2.87078	4.44004
900	2020	8	8	0	219	2020.6										28.0879	31.4474	236.474	7.91763	2134.09	1913.36	537.389	2.63524	3.99172	19.258	32.894		8.1097	2187.19	1921.95	322.801	2.89705	4.48392
901	2020	8	8	1	219.042	2020.6										28.0792	31.448	239.267	7.91933	2134.12	1912.62	534.907	2.64289	4.00341	19.36	32.892		8.09458	2187.08	1929.03	336.616	2.82781	4.37565
902	2020	8	8	2	219.083	2020.6										28.045	31.4575	239.159	7.91803	2134.54	1913.82	536.883	2.63416	3.99051	20.255	32.704		8.07747	2176.18	1922.16	351.46	2.80334	4.32971
903	2020	8	8	3	219.125	2020.6										27.99	31.473	241.738	7.91673	2135.23	1915.38	538.912	2.62407	3.97575	19.348	32.887		8.09635	2186.79	1927.97	334.942	2.83523	4.38731
904	2020	8	8	4	219.167	2020.6										27.934	31.4852	242.461	7.91543	2135.78	1916.83	540.927	2.61362	3.96048	19.23	32.9		8.12124	2187.54	1916.26	312.609	2.95618	4.57569
905	2020	8	8	5	219.208	2020.6										27.887	31.4878	242.902	7.91513	2135.89	1917.4	541.405	2.60804	3.95258	20.314	32.619		8.10212	2171.25	1904.77	327.627	2.92769	4.52198
906	2020	8	8	6	219.25	2020.6										27.8709	31.4896	242.138	7.91383	2135.97	1918.2	543.345	2.60036	3.94112	19.37	32.907		8.115	2187.95	1918.79	318.085	2.93764	4.54532
907	2020	8	8	7	219.292	2020.6										27.861	31.4963	242.847	7.91153	2136.27	1919.61	546.806	2.58884	3.92371	19.688	32.819		8.12189	2182.85	1908.42	311.381	2.99545	4.63195
908	2020	8	8	8	219.333	2020.6										27.8385	31.5001	243.211	7.90923	2136.44	1921	550.273	2.57594	3.9044	20.033	32.755		8.13177	2179.13	1897.21	302.331	3.07626	4.7534
909	2020	8	8	9	219.375	2020.6										27.808	31.4694	242.693	7.90793	2135.07	1920.75	552.039	2.56405	3.88709	19.701	32.812		8.12165	2182.44	1908.12	311.539	2.99464	4.63062
910	2020	8	8	10	219.417	2020.6										27.7719	31.4733	243.158	7.90863	2135.25	1920.81	551.027	2.5645	3.88817	19.761	32.803		8.12554	2181.92	1905.09	308.082	3.02057	4.6701
911	2020	8	8	11	219.458	2020.6										27.687	31.4662	243.612	7.91233	2134.93	1919.39	545.495	2.57401	3.90372	19.784	32.808		8.12042	2182.21	1907.92	312.555	2.99582	4.63151
912	2020	8	8	12	219.5	2020.6										27.6512	31.4621	244.501	7.91403	2134.75	1918.68	542.965	2.5786	3.91117	20.072	32.723		8.11731	2177.28	1903.35	314.684	2.99747	4.63154
913	2020	8	8	13	219.542	2020.6										27.6042	31.4809	243.734	7.91573	2135.59	1918.86	540.591	2.58429	3.92017	20.244	32.652		8.11219	2173.16	1901.45	318.742	2.97847	4.60089
914	2020	8	8	14	219.583	2020.6										27.5705	31.5082	246.344	7.91743	2136.8	1919.24	538.275	2.59199	3.93195	20.478	32.624		8.12007	2171.54	1893.96	311.491	3.04123	4.69528
915	2020	8	8	15	219.625	2020.6										27.5899	31.604	246.34	7.91713	2141.06	1922.59	539.3	2.60114	3.94454	20.996	32.459		8.12996	2161.97	1876.71	301.76	3.12798	4.82452
916	2020	8	8	16	219.667	2020.6										27.5999	31.6291	243.368	7.91583	2142.18	1924.03	541.366	2.59802	3.93941	21.006	32.512		8.13484	2165.05	1876.3	297.886	3.16309	4.87792
917	2020	8	8	17	219.708	2020.6										27.6057	31.5948	243.074	7.91853	2140.65	1921.49	537.182	2.60861	3.95576	20.57	32.627		8.13173	2171.71	1886.91	301.392	3.11508	4.8081
918	2020	8	8	18	219.75	2020.6										27.6059	31.6362	245.085	7.91523	2142.49	1924.52	542.292	2.5963	3.93664	20.612	32.606		8.12361	2170.5	1890.09	308.236	3.07197	4.74128
919	2020	8	8	19	219.792	2020.6										27.5558	31.727	245.858	7.87993	2146.53	1944.74	597.393	2.43184	3.68693	20.957	32.486		8.12349	2163.54	1881.82	307.491	3.09161	4.76861
920	2020	8	8	20	219.833	2020.6										27.5297	31.7548	245.698	7.87564	2147.77	1947.89	604.56	2.41208	3.65699	20.881	32.51		8.12238	2164.93	1884.16	308.635	3.08069	4.75244
921	2020	8	8	21	219.875	2020.6										27.5261	31.7699	245.676	7.88034	2148.44	1946.28	597.056	2.43482	3.69136	21.158	32.382		8.12526	2157.51	1874.46	305.284	3.10888	4.79389
922	2020	8	8	22	219.917	2020.6										27.543	31.8077	245.701	7.88404	2150.12	1945.79	591.383	2.45684	3.72415	21.129	32.402		8.12714	2158.67	1874.57	303.787	3.11887	4.80942
923	2020	8	8	23	219.958	2020.6										27.555	31.8366	245.339	7.88374	2151.41	1946.87	592.062	2.45901	3.727	21.278	32.32		8.12503	2153.91	1870.78	305.081	3.11208	4.79802
924	2020	8	9	0	220	2020.6										27.5474	31.8462	244.854	7.88244	2151.84	1947.87	594.212	2.45309	3.71803	21.08	32.435		8.13291	2160.58	1873.27	299.071	3.1501	4.85784
925	2020	8	9	1	220.042	2020.6										27.5452	31.8351	242.127	7.87914	2151.34	1949.03	599.45	2.43655	3.6931	20.766	32.551		8.1148	2167.31	1891.13	315.587	3.03264	4.67928
926	2020	8	9	2	220.083	2020.6										27.5442	31.8161	242.66	7.87984	2150.5	1948.03	598.184	2.43808	3.69562	21.187	32.339		8.11768	2155.02	1876.43	311.633	3.06469	4.72587
927	2020	8	9	3	220.125	2020.6										27.5486	31.7995	243.086	7.88154	2149.76	1946.62	595.329	2.44494	3.70614	21.171	32.281		8.08256	2151.65	1892.69	343.514	2.86824	4.42376
928	2020	8	9	4	220.167	2020.6										27.5447	31.7846	242.761	7.88124	2149.1	1946.26	595.707	2.44191	3.70174	21.029	32.427		8.13345	2160.12	1873.05	298.607	3.14674	4.8534
929	2020	8	9	5	220.208	2020.6										27.5179	31.7851	245.454	7.87994	2149.12	1947.06	597.808	2.43357	3.6894	21.248	32.275		8.11533	2151.3	1874.3	313.314	3.05001	4.70321
930	2020	8	9	6	220.25	2020.6										27.479	31.8267	246.459	7.87364	2150.97	1951.71	608.349	2.40465	3.64559	21.237	32.277		8.12421	2151.42	1869.63	305.577	3.09786	4.77711
931	2020	8	9	7	220.292	2020.6										27.4657	31.8451	246.26	7.86834	2151.79	1954.89	617.222	2.38079	3.60939	21.235	32.294		8.1141	2152.41	1875.94	314.516	3.04436	4.69444
932	2020	8	9	8	220.333	2020.6										27.4659	31.8491	246.355	7.86304	2151.97	1957.45	626.102	2.35705	3.57336	21.084	32.389		8.11098	2157.91	1883.2	317.903	3.02398	4.66381
933	2020	8	9	9	220.375	2020.6										27.4981	31.8761	246.928	7.85574	2153.17	1961.52	638.686	2.32913	3.53041	21.168	32.359		8.11287	2156.17	1880.12	316.009	3.03899	4.68626
934	2020	8	9	10	220.417	2020.6										27.524	31.8941	246.879	7.85044	2153.97	1964.39	647.955	2.3091	3.49959	21.063	32.401		8.11075	2158.61	1884.04	318.19	3.02209	4.66102
935	2020	8	9	11	220.458	2020.6										27.5747	31.9131	246.032	7.84414	2154.81	1967.57	659.116	2.28692	3.46524	21.023	32.414		8.11663	2159.36	1881.77	313.06	3.05166	4.70698
936	2020	8	9	12	220.5	2020.6										27.5716	31.9244	244.219	7.84084	2155.32	1969.47	665.042	2.27303	3.44413	21.228	32.312		8.11952	2153.45	1873.86	309.851	3.07555	4.74241
937	2020	8	9	13	220.542	2020.6										27.5899	31.9292	242.961	7.83954	2155.53	1970.1	667.394	2.26921	3.4381	21.133	32.386		8.1214	2157.74	1876.97	308.666	3.08552	4.75814
938	2020	8	9	14	220.583	2020.6										27.6788	31.9323	242.384	7.84224	2155.67	1968.44	662.629	2.28871	3.46663	21.254	32.327		8.12429	2154.32	1871.71	305.774	3.10639	4.78946
939	2020	8	9	15	220.625	2020.6										27.7579	31.9327	242.157	7.84394	2155.69	1967.18	659.629	2.30286	3.48719	21.486	32.203		8.13017	2147.13	1860.91	299.932	3.14719	4.85084
940	2020	8	9	16	220.667	2020.6										27.7716	31.9373	241.666	7.84464	2155.89	1966.94	658.432	2.30749	3.49401	21.222	32.369		8.12005	2156.75	1876.2	309.698	3.0851	4.75655
941	2020	8	9	17	220.708	2020.6										27.814	31.9604	243.033	7.84834	2156.92	1965.83	652.124	2.3295	3.52663	20.895	32.533		8.11694	2166.26	1888.07	313.522	3.05518	4.71267
942	2020	8	9	18	220.75	2020.6										27.84	31.986	243.321	7.85104	2158.06	1965.35	647.621	2.34597	3.55103	21.004	32.398		8.12482	2158.44	1876.72	305.84	3.0926	4.77055
943	2020	8	9	19	220.792	2020.6										27.81	32.034	245.024	7.85574	2160.19	1965.13	639.878	2.36872	3.58535	21.094	32.368		8.1207	2156.7	1876.86	309.198	3.07541	4.74324
944	2020	8	9	20	220.833	2020.61										27.7749	32.0573	244.677	7.85844	2161.23	1964.97	635.436	2.37998	3.60257	21.017	32.383		8.12459	2157.57	1876.06	305.952	3.09075	4.76771
945	2020	8	9	21	220.875	2020.61										27.763	32.0556	242.324	7.85714	2161.15	1965.58	637.646	2.37289	3.59199	20.994	32.405		8.12547	2158.84	1876.76	305.321	3.09605	4.77592
946	2020	8	9	22	220.917	2020.61										27.7608	32.049	243.391	7.86484	2160.86	1961.82	624.536	2.40743	3.64437	20.907	32.37		8.12636	2156.81	1875.42	304.423	3.08752	4.76426
947	2020	8	9	23	220.958	2020.61										27.7471	32.0457	244.047	7.87254	2160.71	1958.22	611.694	2.44165	3.69636	20.952	32.478		8.12524	2163.07	1880.54	305.938	3.09972	4.78126
948	2020	8	10	0	221	2020.61										27.7158	32.0437	243.878	7.87424	2160.62	1957.57	608.888	2.44666	3.70434	20.959	32.441		8.11912	2160.93	1882.16	311.055	3.06214	4.72363
949	2020	8	10	1	221.042	2020.61										27.638	32.0672	246.12	7.87894	2161.67	1956.74	601.398	2.46385	3.73105	20.77	32.534		8.10601	2166.32	1895.08	323.372	2.98342	4.60348
950	2020	8	10	2	221.083	2020.61										27.549	32.0995	245.412	7.87964	2163.11	1958.17	600.513	2.46209	3.72912	20.836	32.517		8.11189	2165.34	1890.58	317.945	3.01973	4.65888
951	2020	8	10	3	221.125	2020.61										27.4825	32.1232	246	7.88034	2164.16	1959.14	599.561	2.46157	3.72888	21.015	32.392		8.11177	2158.09	1883.47	317.25	3.02167	4.66106
952	2020	8	10	4	221.167	2020.61										27.4307	32.1448	246.442	7.88204	2165.12	1959.46	596.98	2.46685	3.73728	21.085	32.319		8.11066	2153.86	1880.18	317.797	3.01361	4.6486
953	2020	8	10	5	221.208	2020.61										27.3799	32.1554	246.35	7.85274	2165.59	1973.7	646.011	2.32881	3.52861	21.014	32.373		8.10654	2156.99	1885.44	321.839	2.99095	4.61391
954	2020	8	10	6	221.25	2020.61										27.333	32.1681	247.423	7.85244	2166.16	1974.61	646.63	2.32457	3.52259	20.885	32.413		8.11443	2159.31	1884.06	315.081	3.0255	4.66835
955	2020	8	10	7	221.292	2020.61										27.3432	32.1832	247.923	7.85114	2166.83	1975.67	649.003	2.32084	3.51669	20.804	32.504		8.11731	2164.58	1887.3	313.082	3.04433	4.69737
956	2020	8	10	8	221.333	2020.61										27.3736	32.1978	247.432	7.84884	2167.48	1977.04	653.126	2.3143	3.5063	20.779	32.509		8.11719	2164.87	1887.8	313.226	3.04177	4.69369
957	2020	8	10	9	221.375	2020.61										27.3963	32.2152	245.907	7.84454	2168.25	1979.46	660.82	2.29846	3.48189	20.927	32.488		8.11608	2163.65	1886.23	314.013	3.04812	4.70188
958	2020	8	10	10	221.417	2020.61										27.4521	32.2387	244.44	7.84024	2169.3	1981.88	668.649	2.28593	3.46209	21.007	32.451		8.12296	2161.51	1880.11	307.734	3.08939	4.76495
959	2020	8	10	11	221.458	2020.61										27.4899	32.2505	243.808	7.83794	2169.82	1983.09	672.867	2.27984	3.45236	20.984	32.453		8.11784	2161.62	1883.2	312.23	3.0592	4.71865
960	2020	8	10	12	221.5	2020.61										27.5079	32.2609	244.986	7.83964	2170.29	1982.59	669.906	2.28968	3.46697	20.945	32.522		8.11873	2165.63	1886.17	311.855	3.06873	4.73305
961	2020	8	10	13	221.542	2020.61										27.5076	32.2552	242.798	7.83734	2170.03	1983.42	673.985	2.27903	3.4509	20.986	32.56		8.12861	2167.83	1882.1	303.453	3.13238	4.83027
962	2020	8	10	14	221.583	2020.61										27.5072	32.2318	241.745	7.84004	2168.99	1981.36	668.953	2.28905	3.46628	21.019	32.531		8.1145	2166.15	1888.28	315.603	3.05424	4.70968
963	2020	8	10	15	221.625	2020.61										27.429	32.2034	244.583	7.84974	2167.73	1976.47	651.598	2.32342	3.51946	21.2	32.451		8.12238	2161.51	1878.82	308.126	3.10609	4.78824
964	2020	8	10	16	221.667	2020.61										27.3848	32.1835	246.329	7.85744	2166.84	1972.54	638.14	2.35273	3.56453	20.909	32.672		8.14126	2174.32	1880.71	293.385	3.20979	4.94935
965	2020	8	10	17	221.708	2020.61										27.5045	32.2038	247.678	7.87214	2167.75	1965.69	613.55	2.43214	3.68326	21.202	32.504		8.12015	2164.58	1882.43	310.363	3.10068	4.77928
966	2020	8	10	18	221.75	2020.61										27.6538	32.2539	246.825	7.88584	2169.98	1959.99	591.581	2.51418	3.8052	20.852	32.689		8.13703	2175.31	1884.35	297.054	3.18207	4.90715
967	2020	8	10	19	221.792	2020.61										27.6895	32.2631	244.699	7.88754	2170.39	1959.26	588.916	2.52632	3.82306	20.549	32.747		8.12792	2178.67	1894.63	305.307	3.10699	4.79454
968	2020	8	10	20	221.833	2020.61										27.704	32.2702	243.173	7.88724	2170.7	1959.55	589.44	2.52681	3.82355	20.722	32.701		8.1288	2176	1890.6	304.2	3.12397	4.81907
969	2020	8	10	21	221.875	2020.61										27.729	32.2867	242.866	7.88894	2171.44	1959.15	586.837	2.53868	3.84104	20.781	32.703		8.12968	2176.12	1889.7	303.418	3.13527	4.83572
970	2020	8	10	22	221.917	2020.61										27.7926	32.3005	241.727	7.88964	2172.05	1958.85	585.797	2.54903	3.85578	20.811	32.679		8.12757	2174.73	1889.53	305.092	3.12355	4.81754
971	2020	8	10	23	221.958	2020.61										27.8429	32.308	241.558	7.89034	2172.38	1958.43	584.719	2.55764	3.86811	20.877	32.653		8.12145	2173.22	1891.19	310.225	3.09321	4.77019
972	2020	8	11	0	222	2020.61										27.8552	32.2971	242.485	7.89304	2171.9	1956.66	580.371	2.57088	3.88809	20.881	32.648		8.11333	2172.93	1895.38	317.368	3.04842	4.70113
973	2020	8	11	1	222.042	2020.61										27.8754	32.2803	242.758	7.89674	2171.15	1954.14	574.445	2.58925	3.9158	21.071	32.569		8.11222	2168.35	1890.82	317.817	3.05184	4.7049
974	2020	8	11	2	222.083	2020.61										27.887	32.2674	244.034	7.90444	2170.58	1949.86	562.441	2.62699	3.97285	20.71	32.698		8.1131	2175.83	1899.21	317.95	3.03598	4.68351
975	2020	8	11	3	222.125	2020.61										27.8859	32.2581	243.116	7.90714	2170.16	1948.22	558.258	2.6394	3.99173	20.651	32.712		8.10899	2176.64	1902.58	321.758	3.00938	4.64305
976	2020	8	11	4	222.167	2020.61										27.8909	32.2513	241.268	7.90784	2169.86	1947.6	557.147	2.64272	3.99676	20.816	32.642		8.10787	2172.58	1898.63	322.281	3.01137	4.64485
977	2020	8	11	5	222.208	2020.61										27.9045	32.2402	239.191	7.90754	2169.37	1947.26	557.524	2.64149	3.99484	21.184	32.524		8.09275	2165.74	1898.36	335.328	2.95255	4.55095
978	2020	8	11	6	222.25	2020.61										27.8973	32.2171	240.786	7.90824	2168.34	1946.16	556.315	2.64218	3.99622	20.87	32.634		8.10664	2172.12	1898.48	323.324	3.00916	4.64087
979	2020	8	11	7	222.292	2020.61										27.953	32.2039	243.603	7.87794	2167.75	1959.9	603.914	2.49896	3.77906	20.817	32.653		8.10952	2173.22	1898.22	320.852	3.02178	4.66078
980	2020	8	11	8	222.333	2020.61										28.0395	32.1961	243.636	7.87564	2167.4	1960.11	607.6	2.49508	3.77222	21.011	32.589		8.1114	2169.51	1892.67	318.692	3.04378	4.693
981	2020	8	11	9	222.375	2020.61										28.0666	32.1881	241.905	7.87234	2167.05	1961.2	612.977	2.48117	3.75095	20.779	32.699		8.11529	2175.89	1897.48	315.969	3.05506	4.71208
982	2020	8	11	10	222.417	2020.61										28.09	32.1826	243.01	7.87104	2166.8	1961.45	615.086	2.47663	3.74387	21.069	32.604		8.10817	2170.38	1894.64	321.654	3.03392	4.67692
983	2020	8	11	11	222.458	2020.61										28.0983	32.1779	243.85	7.87074	2166.59	1961.37	615.548	2.47555	3.74217	21.183	32.622		8.11506	2171.42	1890.74	315.518	3.08553	4.75483
984	2020	8	11	12	222.5	2020.61										28.092	32.1721	243.997	7.87344	2166.34	1959.94	611.035	2.48724	3.75999	21.233	32.614		8.11394	2170.96	1890.57	316.438	3.08352	4.75118
985	2020	8	11	13	222.542	2020.61										28.089	32.1624	242.788	7.87414	2165.91	1959.28	609.811	2.48945	3.76345	21.454	32.565		8.11182	2168.12	1887.67	317.927	3.08843	4.75649
986	2020	8	11	14	222.583	2020.61										28.0879	32.1522	243.138	7.87584	2165.45	1958.13	606.942	2.49652	3.77426	21.404	32.568		8.09971	2168.29	1894.83	328.999	3.01743	4.64773
987	2020	8	11	15	222.625	2020.61										28.104	32.1466	242.588	7.87854	2165.2	1956.54	602.481	2.51032	3.79498	22.057	32.409		8.10359	2159.07	1880.09	324.133	3.08552	4.74601
988	2020	8	11	16	222.667	2020.61										28.1281	32.1422	237.999	7.87624	2165.01	1957.31	606.202	2.50114	3.78086	22.034	32.474		8.11848	2162.84	1874.99	311.148	3.17428	4.88208
989	2020	8	11	17	222.708	2020.61										28.1899	32.1275	241.679	7.88194	2164.35	1953.65	596.797	2.53263	3.82785	21.821	32.477		8.10236	2163.02	1885.81	325.793	3.06304	4.71369
990	2020	8	11	18	222.75	2020.61										28.2199	32.111	240.687	7.88364	2163.62	1952.05	593.929	2.54206	3.8419	21.941	32.494		8.10024	2164	1886.74	327.766	3.06587	4.71631
991	2020	8	11	19	222.792	2020.61										28.2336	32.0829	240.843	7.88734	2162.37	1949.19	587.799	2.55867	3.86712	21.434	32.597		8.10713	2169.97	1891.86	322.356	3.06455	4.71961
992	2020	8	11	20	222.833	2020.61										28.2906	32.0719	240.68	7.88905	2161.88	1947.59	584.995	2.57113	3.88536	20.789	32.788		8.11301	2181.05	1902.7	318.496	3.05467	4.71038
993	2020	8	11	21	222.875	2020.61										28.339	32.0439	239.459	7.88775	2160.63	1946.89	586.853	2.56673	3.8784	21.132	32.7		8.10989	2175.95	1897.54	320.61	3.06168	4.71786
994	2020	8	11	22	222.917	2020.61										28.3789	32.0601	238.58	7.88545	2161.35	1948.28	590.625	2.56068	3.86858	21.029	32.707		8.09978	2176.35	1904.23	329.948	2.99705	4.61946
995	2020	8	11	23	222.958	2020.61										28.4654	32.1096	239.624	7.88515	2163.56	1949.57	591.413	2.57155	3.88341	20.906	32.708		8.09766	2176.41	1906.42	331.979	2.97345	4.58456
996	2020	8	12	0	223	2020.61										28.4858	32.141	241.886	7.88885	2164.95	1948.75	585.703	2.59429	3.91716	20.976	32.736		8.09555	2178.03	1908.27	334.083	2.97248	4.58193
997	2020	8	12	1	223.042	2020.61										28.4828	32.1503	240.139	7.88555	2165.37	1950.69	591.044	2.57873	3.89362	20.674	32.776		8.11543	2180.35	1901.78	316.332	3.05469	4.71198
998	2020	8	12	2	223.083	2020.61										28.4711	31.9899	240.151	7.88625	2158.23	1944.78	588.826	2.56669	3.87725	21.081	32.678		8.09631	2174.67	1904.34	332.968	2.98006	4.59295
999	2020	8	12	3	223.125	2020.61										28.4628	32.062	241.237	7.88795	2161.44	1946.56	586.607	2.58067	3.89772	21.527	32.571		8.0872	2168.47	1900.71	340.69	2.96275	4.56196
1000	2020	8	12	4	223.167	2020.61										28.4641	32.1148	238.769	7.88365	2163.79	1950.48	593.862	2.56462	3.8729	20.489	32.833		8.10808	2183.66	1909.93	323.353	3.00299	4.63388
1001	2020	8	12	5	223.208	2020.61										28.4219	32.1181	241.556	7.88635	2163.93	1949.59	589.563	2.57417	3.88782	20.448	32.821		8.09796	2182.96	1915.18	332.591	2.94314	4.54212
1002	2020	8	12	6	223.25	2020.61										28.3988	32.1031	240.017	7.88505	2163.27	1949.85	591.553	2.5644	3.87351	21.045	32.687		8.08985	2175.19	1908.52	339.117	2.94296	4.5361
1003	2020	8	12	7	223.292	2020.61										28.397	32.0604	241.07	7.88475	2161.37	1948.5	591.741	2.55897	3.86578	20.689	32.761		8.07573	2179.48	1922.27	353.353	2.84262	4.38482
1004	2020	8	12	8	223.333	2020.61										28.3358	32.0562	244.793	7.88945	2161.18	1946.53	584.233	2.57581	3.89203	21.479	32.47		8.08662	2162.61	1896.78	340.656	2.94261	4.53263
1005	2020	8	12	9	223.375	2020.61										28.2931	32.0841	245.907	7.89115	2162.42	1946.99	581.746	2.58268	3.90265	20.618	32.798		8.0985	2181.63	1912.45	331.876	2.9601	4.56652
1006	2020	8	12	10	223.417	2020.61										28.3164	32.0952	245.459	7.88885	2162.92	1948.33	585.459	2.57461	3.89006	21.154	32.672		8.11338	2174.32	1894.17	317.305	3.07961	4.74552
1007	2020	8	12	11	223.458	2020.61										28.3774	32.0638	243.724	7.88555	2161.52	1948.38	590.488	2.56136	3.8696	20.863	32.752		8.11127	2178.96	1901.4	319.817	3.04821	4.69989
1008	2020	8	12	12	223.5	2020.61	20.0471	33.2029	267.428	7.979	2217.58	2007.85	467.015	2.37663	3.66856	28.4356	32.045	243.254	7.88425	2160.68	1947.93	592.422	2.5587	3.86504	20.666	32.802		8.11615	2181.86	1902.64	315.84	3.06106	4.72162
1009	2020	8	12	13	223.542	2020.61	20.3229	33.199	274.253	7.99129	2217.33	1999.81	451.744	2.45619	3.78869	28.427	32.0591	244.049	7.88595	2161.31	1947.67	589.795	2.56741	3.87817	21.063	32.683		8.11703	2174.96	1893.42	314.17	3.09176	4.76528
1010	2020	8	12	14	223.583	2020.61	20.4679	33.2129	274.76	7.99259	2218.2	1998.85	450.291	2.47622	3.81801	28.4569	32.0504	242.167	7.88265	2160.92	1948.74	595.028	2.55338	3.85669	21.915	32.482		8.10192	2163.31	1885.5	326.17	3.0709	4.72452
1011	2020	8	12	15	223.625	2020.61	20.5911	33.2371	279.479	7.99888	2219.7	1996.14	442.881	2.51928	3.88295	28.5101	32.0255	240.825	7.87956	2159.81	1948.96	599.835	2.54112	3.83776	22.058	32.683		8.0958	2174.96	1896.79	332.925	3.07713	4.72999
1012	2020	8	12	16	223.667	2020.61	20.547	33.2438	279.667	7.99917	2220.11	1996.66	442.592	2.51752	3.88064	28.5429	31.9818	238.356	7.87748	2157.87	1948.18	602.915	2.53019	3.8213	21.931	32.668		8.10269	2174.09	1893.39	326.523	3.10016	4.76721
1013	2020	8	12	17	223.708	2020.61	20.517	33.2513	277.885	7.99646	2220.58	1998.59	445.928	2.50285	3.85826	28.5621	31.9141	239.133	7.88239	2154.86	1943.32	594.46	2.54955	3.85101	22.358	32.637		8.10557	2172.29	1886.8	323.425	3.15683	4.84902
1014	2020	8	12	18	223.75	2020.61	20.4999	33.2768	278.259	7.99876	2222.16	1998.91	443.392	2.51496	3.87689	28.5776	31.8661	239.688	7.8873	2152.72	1939.18	586.25	2.57044	3.88288	21.854	32.733		8.09945	2177.86	1898.76	329.934	3.08249	4.74032
1015	2020	8	12	19	223.792	2020.61	20.3014	33.1906	281.79	7.99805	2216.81	1996.26	443.474	2.4851	3.83356	28.6441	31.9472	241.714	7.89822	2156.33	1936.28	569.598	2.63751	3.98246	21.737	32.761		8.09934	2179.48	1901.07	330.275	3.0733	4.72739
1016	2020	8	12	20	223.833	2020.61	20.4101	33.2198	280.429	7.99634	2218.62	1997.81	445.794	2.48961	3.83918	28.676	31.9983	242.036	7.90213	2158.6	1935.93	563.862	2.66469	4.02253	21.308	32.791		8.09722	2181.22	1907.15	332.668	3.02165	4.65301
1017	2020	8	12	21	223.875	2020.61	20.5154	33.2519	277.267	7.99264	2220.62	2000.5	450.587	2.4847	3.83029	28.6858	32.0007	239.715	7.90105	2158.71	1936.47	565.547	2.66041	4.01592	22.235	32.644		8.09811	2172.7	1892.28	330.435	3.10325	4.76827
1018	2020	8	12	22	223.917	2020.61	20.4807	33.2574	277.787	7.99193	2220.96	2001.38	451.504	2.47895	3.82173	28.6459	31.9884	238.311	7.89896	2158.16	1937.35	568.715	2.64515	3.99352	21.62	32.784		8.08399	2180.82	1911.44	345.019	2.98067	4.58611
1019	2020	8	12	23	223.958	2020.61	20.4127	33.2655	275.884	7.99022	2221.46	2003.12	453.673	2.46592	3.80225	28.6436	31.9713	240.162	7.90087	2157.4	1935.83	565.643	2.65287	4.0054	20.999	32.856		8.09187	2184.99	1915.56	338.245	2.96958	4.57592
1020	2020	8	13	0	224	2020.61	20.3661	33.2621	272.569	7.98751	2221.25	2004.58	456.977	2.44892	3.77653	28.6489	31.979	240.466	7.90379	2157.75	1934.64	561.207	2.66862	4.02903	20.363	32.931		8.10576	2189.34	1916.72	326.098	2.98972	4.61389
1021	2020	8	13	1	224.042	2020.61	20.3672	33.2873	274.122	7.98881	2222.81	2005.26	455.617	2.45768	3.78982	28.6659	31.9854	239.677	7.9057	2158.03	1933.8	558.312	2.68041	4.04654	21.114	32.793		8.09864	2181.34	1908.07	331.463	3.00998	4.63742
1022	2020	8	13	2	224.083	2020.61	20.333	33.2873	272.304	7.9851	2222.81	2007.29	460.207	2.4375	3.75904	28.6886	31.9832	238.175	7.90662	2157.93	1933.11	556.892	2.68695	4.05613	20.947	32.905		8.08652	2187.83	1921.12	343.665	2.94166	4.53302
1023	2020	8	13	3	224.125	2020.61	20.2912	33.2841	270.943	7.98439	2222.61	2007.76	461.056	2.43032	3.74841	28.708	32.0062	240.714	7.91053	2158.96	1931.83	551.094	2.7107	4.09147	20.47	32.917		8.10841	2188.53	1913.75	323.549	3.01311	4.64884
1024	2020	8	13	4	224.167	2020.61	20.2795	33.2856	272.051	7.98568	2222.71	2007.3	459.462	2.43546	3.75644	28.664	32.04	242.786	7.91344	2160.46	1931.88	546.949	2.72444	4.11242	20.441	32.94		8.11429	2189.86	1911.82	318.393	3.04503	4.6982
1025	2020	8	13	5	224.208	2020.61	20.2729	33.2971	270.985	7.98198	2223.42	2009.72	464.195	2.41896	3.73096	28.621	32.0412	242.638	7.91436	2160.51	1931.78	545.613	2.72507	4.11393	20.653	32.888		8.10418	2186.85	1913.21	327.149	3.00508	4.63452
1026	2020	8	13	6	224.25	2020.61	20.2346	33.2951	270.59	7.98027	2223.3	2010.71	466.317	2.40766	3.71391	28.6196	32.0311	240.698	7.87827	2160.06	1949.01	601.934	2.54534	3.84272	20.631	32.911		8.11406	2188.18	1909.04	318.335	3.05953	4.71853
1027	2020	8	13	7	224.292	2020.61	20.2321	33.3168	271.208	7.98256	2224.64	2010.76	463.647	2.42024	3.73317	28.6369	32.0047	240.777	7.88119	2158.89	1946.57	597.005	2.55864	3.86286	20.268	32.941		8.10294	2189.92	1919.48	328.781	2.96631	4.57879
1028	2020	8	13	8	224.333	2020.61	20.2417	33.3575	272.279	7.98386	2227.17	2012.18	462.418	2.43124	3.74972	28.6568	31.9953	242.386	7.8831	2158.47	1945.18	593.839	2.56889	3.87819	20.63	32.901		8.10783	2187.6	1912.01	323.902	3.02416	4.6641
1029	2020	8	13	9	224.375	2020.61	20.2689	33.3503	270.125	7.97715	2226.72	2014.82	470.796	2.4019	3.70427	28.6548	31.9942	242.797	7.88201	2158.42	1945.68	595.585	2.56334	3.86985	21.003	32.791		8.10171	2181.22	1907.23	328.667	3.01518	4.64682
1030	2020	8	13	10	224.417	2020.61	20.3688	33.3312	273.389	7.97544	2225.53	2013.93	472.79	2.40055	3.70137	28.646	31.9952	242.92	7.88093	2158.47	1946.29	597.353	2.55737	3.86093	21.168	32.756		8.07559	2179.19	1918.29	353.249	2.88785	4.449
1031	2020	8	13	11	224.458	2020.61	20.4785	33.3196	278.821	7.97973	2224.81	2010.49	467.24	2.42842	3.74336	28.6229	31.9984	242.689	7.87984	2158.61	1947.09	599.147	2.5503	3.85051	20.808	32.852		8.08348	2184.76	1921.43	346.335	2.90547	4.47944
1032	2020	8	13	12	224.5	2020.62	20.4761	33.3115	275.987	7.97603	2224.31	2011.86	471.86	2.41029	3.71549	28.582	32.0158	243.008	7.87976	2159.38	1948.03	599.423	2.54772	3.84694	20.483	32.917		8.11236	2188.53	1911.48	319.971	3.03593	4.68388
1033	2020	8	13	13	224.542	2020.62	20.494	33.3302	276.025	7.97432	2225.47	2013.52	474.22	2.40588	3.70838	28.5627	32.0371	243.954	7.88067	2160.33	1948.48	598.095	2.55227	3.85384	20.571	32.903		8.11125	2187.72	1910.72	320.85	3.03705	4.68468
1034	2020	8	13	14	224.583	2020.62	20.5319	33.3336	278.366	7.97561	2225.68	2012.81	472.605	2.41539	3.72263	28.6006	32.0399	241.429	7.87758	2160.46	1949.78	603.126	2.54108	3.83644	21.229	32.794		8.10313	2181.4	1904.72	327.255	3.04621	4.69178
1035	2020	8	13	15	224.625	2020.62	20.5867	33.3406	282.417	7.98191	2226.12	2009.76	464.708	2.44994	3.77529	28.6112	32.0401	235.318	7.8695	2160.46	1953.55	616.472	2.50335	3.77934	21.641	32.749		8.10301	2178.79	1899.31	326.863	3.08219	4.74242
1036	2020	8	13	16	224.667	2020.62	20.6399	33.343	282.772	7.9842	2226.27	2008.39	461.858	2.46547	3.79868	28.6639	32.0171	239.205	7.87441	2159.44	1950.05	608.147	2.52955	3.81848	22.446	32.657		8.0929	2173.45	1893.98	335.263	3.0979	4.75712
1037	2020	8	13	17	224.708	2020.62	20.6746	33.3645	278.426	7.97949	2227.6	2011.53	467.981	2.44873	3.77236	28.6426	32.0096	239.979	7.88133	2159.11	1946.64	596.809	2.56028	3.86521	22.35	32.782		8.09578	2180.7	1898.86	333.341	3.11966	4.7904
1038	2020	8	13	18	224.75	2020.62	20.6279	33.3716	278.348	7.97778	2228.04	2013.05	470.212	2.43753	3.75551	28.6142	32.0378	242.091	7.88524	2160.36	1945.95	590.706	2.57921	3.89386	22.406	32.72		8.09067	2177.11	1898.41	337.777	3.0893	4.74374
1039	2020	8	13	19	224.792	2020.62	20.5801	33.3671	280.018	7.98108	2227.76	2011.58	466.004	2.44827	3.77257	28.6059	32.0457	240.856	7.88415	2160.71	1946.81	592.508	2.57388	3.88582	21.938	32.713		8.09055	2176.7	1902.03	338.13	3.03974	4.67372
1040	2020	8	13	20	224.833	2020.62	20.614	33.379	278.797	7.98037	2228.5	2012.29	467.009	2.44913	3.77346	28.6535	32.0502	238.946	7.88107	2160.91	1948.11	597.505	2.56365	3.86974	20.925	32.796		8.10843	2181.51	1904.44	322.592	3.04448	4.69289
1041	2020	8	13	21	224.875	2020.62	20.8275	33.3764	276.248	7.97666	2228.34	2012.4	471.689	2.44992	3.77257	28.711	32.0479	237.711	7.87898	2160.81	1948.63	600.858	2.55859	3.8614	22.114	32.772		8.09432	2180.12	1901.19	334.81	3.08581	4.74162
1042	2020	8	13	22	224.917	2020.62	21.0596	33.3793	273.685	7.97695	2228.52	2010.73	471.34	2.47161	3.8036	28.75	32.0562	239.323	7.8829	2161.18	1946.77	594.549	2.58192	3.89603	22.244	32.824		8.0722	2183.14	1914.55	356.496	2.98469	4.58405
1043	2020	8	13	23	224.958	2020.62	21.151	33.3669	276.185	7.98025	2227.75	2007.83	467.035	2.49376	3.83684	28.7481	32.0703	240.907	7.88681	2161.81	1945.39	588.354	2.60216	3.92645	22.141	32.846		8.06608	2184.41	1919.68	362.838	2.94418	4.52288
1044	2020	8	14	0	225	2020.62	21.1159	33.3656	274.96	7.97754	2227.67	2009.33	470.461	2.4778	3.81266	28.7279	32.0763	241.208	7.88672	2162.07	1945.79	588.541	2.60041	3.92401	21.78	32.92		8.06497	2188.7	1926.59	364.635	2.91124	4.47595
1045	2020	8	14	1	225.042	2020.62	21.1027	33.3683	272.238	7.97483	2227.84	2010.88	473.947	2.46423	3.7919	28.6999	32.0778	241.751	7.88464	2162.14	1947.05	591.911	2.58775	3.90525	21.468	32.867		8.07185	2185.63	1922.99	357.521	2.91068	4.47941
1046	2020	8	14	2	225.083	2020.62	20.698	33.3173	271.901	7.97113	2224.67	2012.92	478.208	2.40715	3.70844	28.6637	32.0958	241.49	7.88055	2162.94	1949.9	598.656	2.56615	3.87292	20.044	32.913		8.12874	2188.3	1905.97	305.774	3.08042	4.758
1047	2020	8	14	3	225.125	2020.62	20.7428	33.2797	266.884	7.96342	2222.34	2014.29	487.867	2.37188	3.65397	28.598	32.1189	242.804	7.87647	2163.97	1953.12	605.515	2.54247	3.83775	20.345	32.958		8.10262	2190.9	1919.8	329.142	2.97429	4.59002
1048	2020	8	14	4	225.167	2020.62	20.8917	33.3119	267.981	7.96671	2224.34	2013.36	483.892	2.40271	3.69976	28.548	32.1355	242.902	7.87438	2164.71	1955.05	609.083	2.52937	3.81844	21.249	32.88		8.0725	2186.38	1925.01	357.059	2.89413	4.45644
1049	2020	8	14	5	225.208	2020.62	20.8338	33.3068	257.479	7.962	2224.02	2015.73	490.01	2.37582	3.65895	28.5111	32.1441	242.672	7.8733	2165.09	1956.13	610.951	2.5216	3.80707	20.628	32.994		8.08639	2192.99	1927.88	344.495	2.91999	4.50251
1050	2020	8	14	6	225.25	2020.62	20.9464	33.3587	258.413	7.9673	2227.24	2015.12	483.595	2.41485	3.71753	28.4869	32.1489	242.699	7.87321	2165.3	1956.51	611.136	2.51943	3.80404	20.201	33.006		8.11327	2193.69	1917.39	319.806	3.02324	4.66681
1051	2020	8	14	7	225.292	2020.62	20.9059	33.3764	263.646	7.96859	2228.34	2015.71	482.085	2.41919	3.72447	28.4879	32.1495	241.332	7.87212	2165.33	1957.04	612.938	2.51438	3.7964	20.264	32.992		8.11115	2192.88	1917.39	321.599	3.01639	4.65562
1052	2020	8	14	8	225.333	2020.62	20.8527	33.3742	258.498	7.96588	2228.2	2017.27	485.592	2.40199	3.69854	28.5067	32.1492	241.255	7.87104	2165.32	1957.41	614.734	2.51086	3.79085	22.055	32.583		8.06604	2169.16	1908.28	361.227	2.90405	4.46504
1053	2020	8	14	9	225.375	2020.62	20.8227	33.3987	262.95	7.96418	2229.72	2019.57	488.074	2.39414	3.68655	28.53	32.1491	240.539	7.87095	2165.31	1957.29	614.868	2.51253	3.7931	21.566	32.819		8.09692	2182.85	1906.46	332.968	3.04971	4.69265
1054	2020	8	14	10	225.417	2020.62	20.8201	33.393	260.05	7.96947	2229.37	2016.77	481.104	2.41765	3.72282	28.592	32.1523	241.967	7.87087	2165.46	1957.01	615.014	2.51798	3.80052	21.509	32.786		8.08581	2180.93	1911.46	343.341	2.97955	4.58575
1055	2020	8	14	11	225.458	2020.62	20.8069	33.3	264.033	7.96976	2223.6	2011.89	479.808	2.40832	3.70931	28.6329	32.156	241.801	7.87178	2165.62	1956.43	613.507	2.52636	3.81264	21.937	32.727		8.09069	2177.51	1902.6	338.081	3.04213	4.67727
1056	2020	8	14	12	225.5	2020.62	20.8678	33.2833	256.83	7.96505	2222.56	2012.83	485.771	2.39018	3.68092	28.6511	32.1553	240.645	7.86969	2165.59	1957.27	616.969	2.51795	3.79973	22.014	32.683		8.09257	2174.96	1898.93	335.989	3.05487	4.69634
1057	2020	8	14	13	225.542	2020.62	20.9887	33.2179	266.272	7.96335	2218.51	2009.38	487.363	2.38588	3.67363	28.6669	32.1565	239.462	7.87261	2165.64	1955.82	612.125	2.53345	3.82291	22.471	32.629		8.09446	2171.83	1891.64	333.611	3.10562	4.76896
1058	2020	8	14	14	225.583	2020.62	21.3311	33.2178	264.336	7.96764	2218.5	2004.9	481.765	2.43466	3.7453	28.6821	32.1667	240.97	7.87752	2166.1	1953.72	604.092	2.55945	3.86184	22.424	32.655		8.10334	2173.34	1888.3	325.528	3.15356	4.8429
1059	2020	8	14	15	225.625	2020.62	21.4282	33.1822	268.682	7.96893	2216.29	2001.74	479.735	2.44528	3.76094	28.681	32.1764	240.629	7.88244	2166.53	1951.71	596.157	2.58411	3.89896	22.694	32.666		8.09922	2173.97	1888.81	329.218	3.16024	4.8494
1060	2020	8	14	16	225.667	2020.62	21.6617	33.0649	266.398	7.97323	2209.02	1991.93	473.051	2.47314	3.80238	28.66	32.1747	239.796	7.87635	2166.45	1954.72	606.081	2.55247	3.85151	22.774	32.665		8.10011	2173.92	1887.59	328.335	3.17352	4.8687
1061	2020	8	14	17	225.708	2020.62	21.7632	32.9822	264.211	7.96752	2203.89	1989.66	479.598	2.44652	3.7611	28.6969	32.1682	237.569	7.87526	2166.16	1954.75	607.807	2.55001	3.84739	22.863	32.577		8.09399	2168.81	1886.27	333.486	3.13733	4.81298
1062	2020	8	14	18	225.75	2020.62	22.0198	32.9176	267.734	7.97481	2199.88	1980.98	469.58	2.4961	3.83519	28.7875	32.1688	237.704	7.87618	2166.19	1953.7	606.271	2.56274	3.86547	22.897	32.414		8.09188	2159.36	1879.77	334.505	3.10839	4.77002
1063	2020	8	14	19	225.792	2020.62	22.1469	32.8992	267.196	7.9761	2198.74	1978.48	467.746	2.51139	3.85749	28.8677	32.1731	237.614	7.87809	2166.38	1952.38	603.127	2.57978	3.8901	22.809	32.444		8.08976	2161.1	1883.02	336.742	3.09134	4.74467
1064	2020	8	14	20	225.833	2020.62	22.165	32.8988	257.849	7.9674	2198.71	1982.54	478.916	2.47185	3.79658	28.895	32.1381	238.201	7.87901	2164.82	1950.51	601.375	2.58362	3.89591	22.792	32.322		8.09164	2154.03	1876.59	334.252	3.08457	4.73593
1065	2020	8	14	21	225.875	2020.62	22.1289	32.9218	260.438	7.97269	2200.14	1981.43	472.319	2.49607	3.83396	28.8589	32.0711	238.234	7.88092	2161.84	1947.48	597.807	2.58363	3.89708	22.784	32.107		8.08853	2141.56	1868.57	335.929	3.03956	4.66944
1066	2020	8	14	22	225.917	2020.62	22.1099	32.9363	255.614	7.96998	2201.04	1983.62	475.942	2.4832	3.81426	28.8111	32.0492	239.189	7.88283	2160.87	1946.13	594.576	2.5866	3.9024	22.717	32.373		8.09241	2156.99	1879.1	333.878	3.08749	4.74081
1067	2020	8	14	23	225.958	2020.62	21.9944	32.9771	259.281	7.97227	2203.57	1985.46	473.397	2.48828	3.82293	28.8549	32.1203	241.183	7.88975	2164.03	1944.97	583.958	2.6311	3.9682	22.756	32.368		8.0853	2156.7	1882.43	340.579	3.05179	4.68553
1068	2020	8	15	0	226	2020.62	21.9139	32.9973	259.144	7.96957	2204.82	1988.38	477.085	2.4707	3.79659	28.8349	32.1671	241.634	7.89266	2166.11	1945.33	579.661	2.64796	3.9934	22.714	32.445		8.08518	2161.16	1886.35	341.179	3.05647	4.69239
1069	2020	8	15	1	226.042	2020.62	21.8594	33.0036	259.796	7.96886	2205.21	1989.44	478.064	2.46334	3.78578	28.8146	32.1827	241.09	7.89158	2166.81	1946.55	581.495	2.64208	3.98464	22.797	32.492		8.07506	2163.89	1893.29	351.252	3.0156	4.62804
1070	2020	8	15	2	226.083	2020.62	21.8187	33.0237	262.889	7.96615	2206.46	1992.07	481.778	2.44931	3.76448	28.8176	32.1854	239.507	7.88849	2166.93	1948.13	586.421	2.62731	3.96229	22.688	32.317		8.08195	2153.74	1882.48	343.532	3.02024	4.63855
1071	2020	8	15	3	226.125	2020.62	21.7399	33.0623	260.491	7.96345	2208.85	1995.92	485.703	2.43402	3.74145	28.8196	32.1831	238.843	7.8874	2166.83	1948.56	588.14	2.62193	3.95417	22.776	32.57		8.07283	2168.41	1898.24	353.959	3.01094	4.6203
1072	2020	8	15	4	226.167	2020.62	21.7116	33.0841	260.834	7.96274	2210.21	1997.59	486.849	2.43059	3.73629	28.8168	32.1874	238.932	7.89032	2167.02	1947.31	583.522	2.63647	3.9761	22.72	32.28		8.07671	2151.59	1883.34	348.364	2.9906	4.59305
1073	2020	8	15	5	226.208	2020.62	21.6837	33.1142	259.483	7.96303	2212.07	1999.21	486.764	2.4327	3.73956	28.7848	32.202	241.353	7.89323	2167.67	1946.63	579.02	2.64928	3.99568	22.487	32.659		8.0846	2173.57	1898.28	343.171	3.05663	4.69319
1074	2020	8	15	6	226.25	2020.62	21.6249	33.1366	258.449	7.96432	2213.46	2000.18	485.291	2.43599	3.74504	28.758	32.2142	241.558	7.89515	2168.21	1946.31	576.1	2.65742	4.00817	22.508	32.677		8.08548	2174.61	1898.45	342.415	3.06588	4.70692
1075	2020	8	15	7	226.292	2020.62	21.6095	33.1712	261.979	7.96862	2215.61	2000.02	480.032	2.45827	3.77916	28.7418	32.2224	241.226	7.89606	2168.57	1946.26	574.728	2.66121	4.01401	22.773	32.4		8.08337	2158.55	1884.8	342.615	3.04697	4.67755
1076	2020	8	15	8	226.333	2020.62	21.5851	33.183	259.456	7.96191	2216.34	2004.02	488.929	2.42623	3.73006	28.7451	32.2233	240.209	7.89497	2168.61	1946.8	576.437	2.65618	4.00638	22.694	32.495		8.09625	2164.06	1882.72	331.005	3.12183	4.79241
1077	2020	8	15	9	226.375	2020.62	21.511	33.1547	259.768	7.9662	2214.59	2001.03	483.014	2.43683	3.74733	28.7829	32.2198	238.817	7.89189	2168.46	1947.92	581.265	2.64405	3.98762	22.65	32.544		8.09113	2166.9	1888.12	336.134	3.09507	4.75135
1078	2020	8	15	10	226.417	2020.62	21.5209	33.157	258.588	7.9615	2214.73	2003.32	489.215	2.41615	3.71542	28.8349	32.2112	239.496	7.8908	2168.08	1947.78	582.903	2.64274	3.98506	22.944	32.448		8.09602	2161.34	1878.63	330.782	3.14068	4.81853
1079	2020	8	15	11	226.458	2020.62	21.5649	33.2026	262.976	7.96879	2217.56	2001.89	480.119	2.45851	3.77973	28.8828	32.2038	238.626	7.88972	2167.75	1947.71	584.557	2.64116	3.98213	22.995	32.541		8.0929	2166.73	1884.14	334.215	3.14048	4.81645
1080	2020	8	15	12	226.5	2020.62	21.5415	33.2403	263.216	7.96708	2219.9	2004.83	482.713	2.45247	3.77037	28.917	32.2038	239.234	7.88863	2167.75	1948	586.272	2.63897	3.97839	23.212	32.555		8.09278	2167.54	1883.01	334.255	3.16445	4.85007
1081	2020	8	15	13	226.542	2020.62	21.532	33.2738	263.483	7.96837	2221.97	2006.01	481.358	2.4612	3.78361	28.96	32.2094	238.45	7.88654	2168	1948.9	589.629	2.63315	3.96901	23.184	32.569		8.08867	2168.35	1886.17	338.268	3.1402	4.81312
1082	2020	8	15	14	226.583	2020.62	21.484	33.3035	264.186	7.97167	2223.82	2006.3	477.38	2.4756	3.806	29.0181	32.2161	238.102	7.88546	2168.29	1949.25	591.392	2.63381	3.96917	23.129	32.586		8.08955	2169.34	1886.91	337.564	3.14153	4.81572
1083	2020	8	15	15	226.625	2020.62	21.441	33.3301	262.209	7.96896	2225.47	2009.3	481.152	2.46197	3.78527	29.0925	32.2158	237.392	7.88537	2168.28	1948.76	591.491	2.64032	3.97802	23.078	32.413		8.10244	2159.31	1872.36	324.537	3.18636	4.88718
1084	2020	8	15	16	226.667	2020.62	21.2889	33.3923	264.271	7.97325	2229.32	2011.54	476.207	2.47545	3.80706	29.129	32.2078	236.888	7.87429	2167.93	1953.6	609.523	2.58835	3.89933	23.272	32.697		8.08832	2175.77	1891.41	339.298	3.1638	4.8466
1085	2020	8	15	17	226.708	2020.62	21.2418	33.4149	263.668	7.97554	2230.73	2011.94	473.48	2.48453	3.82132	29.2	32.2121	236.427	7.8762	2168.12	1952.32	606.359	2.60469	3.92298	22.787	32.788		8.1012	2181.05	1892.42	328.012	3.19686	4.90291
1086	2020	8	15	18	226.75	2020.62	21.1299	33.4169	267.953	7.98384	2230.85	2008.81	462.984	2.51424	3.86817	29.2717	32.2144	236.595	7.87811	2168.22	1950.97	603.193	2.62099	3.94658	22.597	32.82		8.10009	2182.9	1896.11	329.367	3.17451	4.87086
1087	2020	8	15	19	226.792	2020.62	21.2563	33.3013	273.949	7.98813	2223.68	1999.82	456.534	2.5335	3.89743	29.3301	32.2142	235.741	7.88103	2168.21	1949.13	598.397	2.64087	3.97575	22.527	32.836		8.10397	2183.83	1895.24	325.906	3.1911	4.89709
1088	2020	8	15	20	226.833	2020.62	21.2254	33.2811	270.225	7.98142	2222.43	2002.29	464.731	2.49672	3.84133	29.362	32.2122	234.41	7.88394	2168.12	1947.41	593.634	2.6582	4.00144	22.368	32.85		8.11086	2184.64	1893.36	319.8	3.21508	4.9359
1089	2020	8	15	21	226.875	2020.62	21.232	33.2826	271.43	7.98372	2222.52	2001.2	461.864	2.50832	3.8591	29.3759	32.2113	234.904	7.88786	2168.08	1945.35	587.315	2.67904	4.03264	22.032	32.864		8.10974	2185.45	1897.48	321.12	3.17494	4.87865
1090	2020	8	15	22	226.917	2020.62	21.2202	33.2886	268.386	7.97801	2222.89	2004.37	469.123	2.48095	3.81706	29.36	32.2099	236.889	7.89277	2168.02	1942.99	579.484	2.70217	4.06769	21.871	32.881		8.11562	2186.44	1896.32	316.016	3.19335	4.90891
1091	2020	8	15	23	226.958	2020.62	21.1789	33.3248	268.146	7.9803	2225.14	2005.43	466.565	2.49199	3.83418	29.3389	32.2095	238.152	7.89568	2168	1941.69	574.895	2.71488	4.0871	21.781	32.892		8.11751	2187.08	1896.52	314.455	3.1959	4.91391
1092	2020	8	16	0	227	2020.62	21.1192	33.368	267.143	7.97859	2227.82	2008.92	469.143	2.4833	3.82107	29.3009	32.2031	238.757	7.8966	2167.72	1941.29	573.441	2.71528	4.08829	21.689	32.903		8.11839	2187.72	1897.31	313.79	3.19258	4.90991
1093	2020	8	16	1	227.042	2020.62	21.0029	33.3319	262.691	7.97189	2225.58	2011.13	477.38	2.43812	3.75301	29.2591	32.2011	239.021	7.89651	2167.63	1941.56	573.587	2.71065	4.0819	21.672	32.904		8.11727	2187.77	1898.13	314.799	3.18461	4.89786
1094	2020	8	16	2	227.083	2020.62	21.0898	33.3029	261.962	7.97118	2223.78	2009.34	478.01	2.43927	3.75414	29.242	32.1991	238.261	7.89443	2167.54	1942.65	576.865	2.69827	4.06351	21.646	32.906		8.11516	2187.89	1899.63	316.718	3.17019	4.876
1095	2020	8	16	3	227.125	2020.62	21.2471	33.3075	265.632	7.97547	2224.06	2006.38	472.536	2.47335	3.80495	29.2305	32.1963	237.846	7.89134	2167.41	1944.16	581.736	2.68137	4.03824	21.505	32.92		8.11804	2188.7	1899.84	314.312	3.17338	4.88263
1096	2020	8	16	4	227.167	2020.62	21.1526	33.3056	262.258	7.97077	2223.95	2009.23	478.572	2.44301	3.75924	29.2239	32.1946	236.321	7.88926	2167.34	1945.17	585.051	2.67012	4.0214	21.226	32.944		8.11993	2190.09	1902.25	312.95	3.15774	4.86195
1097	2020	8	16	5	227.208	2020.62	21.131	33.3069	259.54	7.96606	2224.03	2011.71	484.706	2.41949	3.72326	29.2222	32.1937	235.203	7.88717	2167.3	1946.18	588.384	2.65944	4.00535	21.618	32.902		8.10681	2187.66	1904.34	324.271	3.12	4.79922
1098	2020	8	16	6	227.25	2020.62	21.0728	33.2915	259.163	7.96535	2223.07	2011.66	485.476	2.40971	3.7089	29.2229	32.1923	235.454	7.88608	2167.24	1946.66	590.119	2.65396	3.9971	21.654	32.835		8.10769	2183.77	1900.51	323.061	3.12024	4.79985
1099	2020	8	16	7	227.292	2020.62	21.0999	33.3096	260.743	7.97064	2224.19	2009.88	478.768	2.43834	3.75256	29.2267	32.1901	236.293	7.886	2167.14	1946.59	590.24	2.65369	3.99667	21.697	32.736		8.10858	2178.03	1895.17	321.67	3.11715	4.79563
1100	2020	8	16	8	227.333	2020.62	21.0748	33.3158	261.145	7.96894	2224.58	2011.2	481.042	2.42892	3.73826	29.2288	32.1877	235.447	7.88491	2167.03	1947.03	591.973	2.64825	3.98848	21.662	32.791		8.13546	2181.22	1882.83	298.377	3.27259	5.03461
1101	2020	8	16	9	227.375	2020.62	21.0081	33.3342	259.53	7.96523	2225.72	2014.4	486.058	2.40805	3.70665	29.2368	32.1855	236.323	7.88383	2166.93	1947.42	593.707	2.6434	3.98109	21.244	32.949		8.15334	2190.38	1883.24	284.595	3.3519	5.16059
1102	2020	8	16	10	227.417	2020.62	21.0191	33.2523	262.326	7.96952	2220.64	2008.02	479.656	2.42032	3.72607	29.2429	32.1841	236.03	7.88174	2166.87	1948.35	597.077	2.63349	3.9661	21.193	32.962		8.15023	2191.14	1886.08	287.241	3.32988	5.12723
1103	2020	8	16	11	227.458	2020.62	21.0525	33.2335	266.47	7.97381	2219.47	2004.75	473.945	2.44109	3.75787	29.2565	32.1823	237.13	7.88065	2166.79	1948.72	598.826	2.62922	3.95951	21.542	32.91		8.14111	2188.12	1885.95	294.299	3.30794	5.08927
1104	2020	8	16	12	227.5	2020.62	21.0907	33.2516	263.945	7.96811	2220.6	2008.14	481.485	2.41981	3.72459	29.2708	32.179	237.222	7.87957	2166.64	1949.03	600.569	2.62488	3.95282	21.578	32.817		8.147	2182.73	1878.1	288.909	3.33371	5.12951
1105	2020	8	16	13	227.542	2020.62	21.233	33.3299	266.791	7.9754	2225.45	2007.68	472.845	2.47415	3.80613	29.3281	32.1623	237.148	7.87748	2165.9	1949.05	603.841	2.61841	3.9425	21.579	32.812		8.13988	2182.44	1881.96	294.81	3.29187	5.06517
1106	2020	8	16	14	227.583	2020.62	21.198	33.3255	263.871	7.96869	2225.18	2010.93	481.455	2.43934	3.75297	29.3364	32.0662	237.818	7.8784	2161.63	1945.17	601.669	2.61499	3.93827	21.543	32.662		8.14776	2173.74	1871.06	287.533	3.31369	5.10101
1107	2020	8	16	15	227.625	2020.62	21.3511	33.2432	271.181	7.98099	2220.08	1999.63	464.914	2.50161	3.84787	29.3659	31.993	237.949	7.87931	2158.37	1941.95	599.653	2.6156	3.93958	21.821	32.817		8.13865	2182.73	1880.78	295.701	3.31163	5.09216
1108	2020	8	16	16	227.667	2020.62	21.5761	33.2161	273.199	7.98328	2218.39	1995.47	461.754	2.5294	3.88848	29.453	32.0433	239.397	7.88222	2160.61	1941.69	595.215	2.64275	3.97879	22.243	32.772		8.11553	2180.12	1888.28	315.246	3.2183	4.94345
1109	2020	8	16	17	227.708	2020.62	21.6374	33.2129	269.781	7.97857	2218.2	1997.16	467.655	2.51202	3.86115	29.47	32.0672	238.318	7.88314	2161.67	1941.96	593.888	2.65109	3.99086	22.034	32.826		8.12941	2183.25	1884.61	303.477	3.28247	5.04429
1110	2020	8	16	18	227.75	2020.62	21.6596	33.1382	270.321	7.97986	2213.56	1992.51	465.307	2.51212	3.8617	29.4803	32.0751	236.691	7.88305	2162.02	1942.2	594.076	2.65235	3.99254	21.964	32.856		8.1063	2184.99	1899.62	324.258	3.14744	4.83738
1111	2020	8	16	19	227.792	2020.62	21.749	33.036	274.197	7.98616	2207.22	1983.52	456.46	2.539	3.90295	29.518	32.0889	235.738	7.88697	2162.64	1940.5	587.839	2.67677	4.02864	22.173	32.858		8.09818	2185.11	1902.47	331.647	3.12416	4.79881
1112	2020	8	16	20	227.833	2020.62	21.8038	33.0149	273.954	7.98445	2205.91	1982.87	458.38	2.53339	3.89394	29.5528	32.0854	234.929	7.88188	2162.48	1942.62	596.007	2.65428	3.99438	22.575	32.668		8.09307	2174.09	1893.31	335.085	3.11362	4.77942
1113	2020	8	16	21	227.875	2020.62	21.798	33.0107	271.951	7.97974	2205.65	1984.99	464.24	2.51001	3.85809	29.6232	32.0892	234.486	7.87879	2162.65	1943.76	601.028	2.64588	3.98077	22.832	32.779		8.07995	2180.53	1903.44	348.201	3.08148	4.72546
1114	2020	8	16	22	227.917	2020.62	21.7601	33.0165	272.09	7.98304	2206.01	1983.96	460.166	2.52296	3.87834	29.7114	32.0961	234.099	7.87871	2162.96	1943.41	601.169	2.65439	3.99233	22.456	32.864		8.10683	2185.45	1895.5	323.482	3.20338	4.91659
1115	2020	8	16	23	227.958	2020.62	21.5969	33.1802	265.047	7.97233	2216.17	1998.79	475.323	2.47551	3.80572	29.7735	32.098	233.324	7.87862	2163.04	1943.08	601.288	2.66	3.99992	22.639	32.864		8.09372	2185.45	1901.3	335.578	3.14868	4.83017
1116	2020	8	17	0	228	2020.62	21.6302	33.1508	268.77	7.97962	2214.34	1993.49	465.737	2.50973	3.85823	29.7989	32.0966	234.879	7.87854	2162.98	1942.89	601.405	2.66184	4.00237	22.99	32.729		8.0956	2177.63	1891.18	332.768	3.17912	4.8736
1117	2020	8	17	1	228.042	2020.62	21.6009	33.2255	269.252	7.98191	2218.98	1996.44	463.554	2.52608	3.88304	29.7989	32.0951	234.878	7.87845	2162.91	1942.88	601.535	2.66128	4.00153	23.375	32.435		8.08549	2160.58	1880.26	340.39	3.1254	4.78939
1118	2020	8	17	2	228.083	2020.62	21.617	33.1885	266.985	7.97721	2216.68	1996.71	469.159	2.50115	3.84486	29.7839	32.0952	235.047	7.87736	2162.92	1943.52	603.328	2.65444	3.99145	23.254	32.687		8.08437	2175.19	1893.31	343.058	3.13846	4.80814
1119	2020	8	17	3	228.125	2020.62	21.678	33.1398	264.755	7.9755	2213.66	1994.58	470.862	2.49323	3.83245	29.7488	32.0973	236.119	7.87928	2163.01	1942.91	600.222	2.66088	4.00158	23.287	32.704		8.08025	2176.18	1896.08	347.144	3.12106	4.78086
1120	2020	8	17	4	228.167	2020.63	21.6588	33.0857	260.676	7.97079	2210.31	1994.2	476.379	2.4637	3.78771	29.7097	32.0996	237.216	7.88019	2163.11	1942.82	598.766	2.66197	4.00371	23.285	32.701		8.08714	2176	1892.14	340.449	3.15902	4.83906
1121	2020	8	17	5	228.208	2020.63	21.6067	33.064	253.924	7.96009	2208.96	1998.55	490.145	2.40734	3.70176	29.692	32.1008	235.897	7.88011	2163.16	1943.03	598.925	2.65997	4.00093	23.377	32.675		8.08202	2174.5	1893.04	345.18	3.13671	4.80392
1122	2020	8	17	6	228.25	2020.63	21.5707	33.0706	253.733	7.95738	2209.37	2000.43	493.802	2.39257	3.67935	29.6781	32.0964	236.398	7.88102	2162.97	1942.53	597.412	2.66283	4.00546	23.392	32.776		8.0769	2180.35	1900.32	350.805	3.12242	4.78069
1123	2020	8	17	7	228.292	2020.63	21.4126	33.1784	253.816	7.95867	2216.06	2006.54	493.168	2.3962	3.68565	29.6964	32.0938	235.912	7.88093	2162.85	1942.35	597.523	2.66389	4.00684	23.064	32.615		8.09779	2171.02	1884.18	330.006	3.1847	4.88244
1124	2020	8	17	8	228.333	2020.63	21.5079	33.0573	253.169	7.95996	2208.54	1998.96	490.235	2.39772	3.68801	29.683	32.089	237.728	7.87885	2162.64	1943.3	600.906	2.65177	3.98883	23.098	32.618		8.10867	2171.19	1877.91	319.966	3.25066	4.98305
1125	2020	8	17	9	228.375	2020.63	21.3815	33.0606	252.186	7.95526	2208.75	2002.23	496.516	2.366	3.64044	29.6909	32.0848	238.051	7.87676	2162.45	1944.11	604.296	2.64174	3.9737	22.897	32.593		8.10256	2169.74	1881.94	325.574	3.1911	4.89482
1126	2020	8	17	10	228.417	2020.63	21.3551	33.1165	254.742	7.96255	2212.22	2001.89	487.416	2.40274	3.69678	29.678	32.0816	237.906	7.87468	2162.31	1945.11	607.723	2.62989	3.95607	22.619	32.566		8.11744	2168.18	1874.72	312.158	3.24257	4.97795
1127	2020	8	17	11	228.458	2020.63	21.3687	33.1408	257.516	7.96584	2213.72	2001.49	483.346	2.42156	3.72539	29.6439	32.0792	236.501	7.87259	2162.2	1946.27	611.182	2.61617	3.93591	22.338	32.749		8.14032	2178.79	1872.23	293.56	3.36891	5.17371
1128	2020	8	17	12	228.5	2020.63	21.3788	33.1399	254.894	7.96013	2213.67	2004.09	490.836	2.39609	3.68612	29.6285	32.0759	236.952	7.8705	2162.06	1947.27	614.642	2.60417	3.91809	22.653	32.625		8.12821	2171.6	1870.94	303.013	3.31608	5.0896
1129	2020	8	17	13	228.542	2020.63	21.4014	33.0608	258.368	7.96643	2208.76	1996.83	481.792	2.41873	3.72138	29.636	32.0744	235.867	7.86742	2161.99	1948.66	619.802	2.5896	3.89608	22.884	32.718		8.11209	2176.99	1882.29	317.579	3.26031	4.99968
1130	2020	8	17	14	228.583	2020.63	21.5003	33.0882	261.445	7.97172	2210.46	1995.02	475.215	2.45461	3.77534	29.6539	32.0761	235.193	7.86533	2162.07	1949.59	623.325	2.58121	3.88321	22.832	32.759		8.12797	2179.37	1875.48	303.775	3.35222	5.14088
1131	2020	8	17	15	228.625	2020.63	21.5298	33.0198	262.456	7.97501	2206.22	1989.68	470.339	2.46532	3.79208	29.6743	32.0814	234.67	7.86425	2162.3	1950.16	625.194	2.57826	3.87845	22.89	32.374		8.15686	2157.04	1841.1	277.731	3.47705	5.33637
1132	2020	8	17	16	228.667	2020.63	21.6213	32.971	263.634	7.97631	2203.19	1985.88	468.223	2.47412	3.80509	29.7108	32.0859	236.422	7.86316	2162.5	1950.58	627.055	2.57673	3.87563	22.957	32.655		8.13074	2173.34	1868.16	300.746	3.36826	5.16493
1133	2020	8	17	17	228.708	2020.63	21.6371	32.9623	258.663	7.9706	2202.65	1988.06	475.428	2.44791	3.76469	29.7337	32.0781	236.354	7.86407	2162.15	1949.71	625.434	2.5826	3.88425	22.969	32.714		8.11963	2176.76	1877.08	310.754	3.31253	5.0786
1134	2020	8	17	18	228.75	2020.63	21.6023	32.9773	257.093	7.96389	2203.58	1992.28	484.273	2.41547	3.71503	29.7652	32.046	236.384	7.86499	2160.73	1947.92	623.638	2.5871	3.89095	22.857	32.481		8.10551	2163.25	1875.58	322.259	3.18909	4.8936
1135	2020	8	17	19	228.792	2020.63	21.5173	33.1001	256.855	7.96818	2211.2	1997.21	479.897	2.44086	3.75392	29.8066	32.0214	236.329	7.8669	2159.63	1945.84	620.208	2.5981	3.90721	22.859	32.829		8.09739	2183.43	1895.8	331.754	3.18817	4.88812
1136	2020	8	17	20	228.833	2020.63	21.5299	33.0915	259.156	7.97248	2210.67	1994.61	474.274	2.46104	3.7849	29.8672	32.0516	237.358	7.87582	2160.98	1942.16	605.527	2.65059	3.98503	23.092	32.708		8.09128	2176.41	1891.78	336.666	3.16285	4.84749
1137	2020	8	17	21	228.875	2020.63	21.519	33.1038	257.512	7.97077	2211.43	1996.15	476.59	2.45343	3.7732	29.8665	32.0697	237.558	7.88073	2161.78	1940.39	597.592	2.67677	4.0242	23.22	32.672		8.09416	2174.32	1887.46	333.631	3.18806	4.88478
1138	2020	8	17	22	228.917	2020.63	21.4623	33.1226	257.283	7.97106	2212.59	1997.39	476.397	2.45189	3.77125	29.8468	32.0746	236.81	7.88164	2162	1940.26	596.148	2.67995	4.02919	22.996	32.617		8.08905	2171.13	1889.7	338.322	3.1287	4.79749
1139	2020	8	17	23	228.958	2020.63	21.4259	33.1484	255.56	7.96736	2214.2	2000.76	481.45	2.43423	3.74425	29.8287	32.0776	236.801	7.88256	2162.13	1940.04	594.694	2.6831	4.03414	22.831	32.887		8.09793	2186.79	1898.35	331.607	3.19564	4.89931
1140	2020	8	18	0	229	2020.63	21.4039	33.1668	253.885	7.96465	2215.34	2003.16	485.165	2.42174	3.72511	29.7832	32.0778	238.021	7.88447	2162.14	1939.43	591.623	2.68842	4.04275	23.064	32.455		8.08981	2161.74	1881.37	336.588	3.11953	4.78439
1141	2020	8	18	1	229.042	2020.63	21.3944	33.1753	252.803	7.96594	2215.86	2003.05	483.559	2.42779	3.73444	29.7072	32.0788	236.213	7.88139	2162.19	1941.53	596.678	2.6658	4.00973	22.711	32.689		8.0927	2175.31	1893.33	335.468	3.12839	4.80003
1142	2020	8	18	2	229.083	2020.63	21.3585	33.2035	252.556	7.96723	2217.61	2004.16	482.152	2.43363	3.74356	29.687	32.08	235.558	7.8793	2162.24	1942.73	600.1	2.65358	3.9916	22.757	32.544		8.08558	2166.9	1890.28	341.363	3.07548	4.71987
1143	2020	8	18	3	229.125	2020.63	21.1593	33.3295	250.593	7.96553	2225.43	2012.93	485.628	2.42178	3.72631	29.6711	32.0814	236.812	7.87921	2162.3	1942.94	600.259	2.65178	3.98909	22.564	32.626		8.09646	2171.66	1889.62	331.651	3.12608	4.79917
1144	2020	8	18	4	229.167	2020.63	21.1099	33.3625	253.295	7.97182	2227.48	2011.98	477.767	2.45017	3.77023	29.6444	32.0808	237.116	7.87913	2162.27	1943.15	600.41	2.64878	3.98494	22.45	32.805		8.08635	2182.03	1904.28	342.39	3.08059	4.72885
1145	2020	8	18	5	229.208	2020.63	21.0264	33.4033	255.731	7.98011	2230.01	2010.69	467.559	2.4861	3.82605	29.6249	32.0777	237.899	7.88004	2162.14	1942.73	598.906	2.65121	3.98889	23.052	32.785		8.07523	2180.87	1904.48	352.746	3.0789	4.71851
1146	2020	8	18	6	229.25	2020.63	20.9867	33.4147	258.632	7.9834	2230.71	2009.96	463.517	2.49941	3.84684	29.6013	32.0754	238.757	7.88096	2162.03	1942.37	597.413	2.65334	3.99242	22.531	32.921		8.09112	2188.76	1906.24	338.461	3.12997	4.80229
1147	2020	8	18	7	229.292	2020.63	20.8507	33.4081	258.908	7.9847	2230.3	2009.98	461.84	2.49296	3.83836	29.584	32.0771	239.657	7.87987	2162.11	1943.09	599.205	2.64645	3.98227	22.479	32.937		8.091	2189.69	1907.47	338.7	3.1259	4.79656
1148	2020	8	18	8	229.333	2020.63	20.8633	33.3409	260.157	7.98299	2226.14	2007.25	463.345	2.47892	3.81715	29.5617	32.0816	239.583	7.87779	2162.31	1944.42	602.662	2.63441	3.9644	22.4	32.793		8.10288	2181.34	1894.99	326.753	3.16605	4.86084
1149	2020	8	18	9	229.375	2020.63	20.8423	33.3268	255.169	7.97528	2225.26	2010.39	472.969	2.43961	3.75695	29.5993	32.0911	240.336	7.8717	2162.73	1947.44	612.771	2.60871	3.92513	22.382	32.866		8.10877	2185.57	1895.14	321.778	3.20675	4.92275
1150	2020	8	18	10	229.417	2020.63	20.9252	33.2752	261.986	7.98258	2222.06	2003.6	463.241	2.47541	3.81165	29.5923	32.1166	241.68	7.86061	2163.87	1953.71	631.679	2.55621	3.84596	22.59	32.9		8.10665	2187.54	1896.08	323.758	3.22124	4.94175
1151	2020	8	18	11	229.458	2020.63	21.0389	33.2336	263.578	7.98087	2219.48	2001.45	464.988	2.47286	3.80691	29.159	32.0333	249.48	7.86553	2160.16	1951.42	622.893	2.53311	3.81752	22.592	32.807		8.10753	2182.15	1891.38	322.425	3.21451	4.93245
1152	2020	8	18	12	229.5	2020.63	21.1398	33.1672	264.283	7.98094	2215.36	1997.26	464.262	2.47493	3.80962	28.7743	32.0561	249.751	7.87644	2161.18	1949.69	605.047	2.55279	3.85178	23.113	32.215		8.10142	2147.83	1863.71	324.328	3.15869	4.84665
1153	2020	8	18	13	229.542	2020.63	21.2919	33.1567	266.719	7.98602	2214.71	1993.15	457.811	2.51103	3.8637	28.6988	32.0988	249.034	7.88336	2163.08	1948.41	594.125	2.58327	3.89828	23.285	32.433		8.1003	2160.47	1872.71	326.47	3.19887	4.90326
1154	2020	8	18	14	229.583	2020.63	21.5593	33.1406	269.312	7.98709	2213.71	1989.84	456.3	2.53799	3.90251	28.811	32.1124	250.273	7.88927	2163.68	1945.23	584.687	2.62392	3.95803	23.289	32.332		8.10419	2154.61	1865.96	322.324	3.20816	4.91866
1155	2020	8	18	15	229.625	2020.63	21.8894	33.2043	270.262	7.99016	2217.66	1989.16	453.031	2.58926	3.97721	28.9522	32.0796	250.162	7.89218	2162.22	1941.66	579.773	2.64857	3.99373	23.433	32.209		8.09907	2147.48	1862.06	326.231	3.17852	4.87273
1156	2020	8	18	16	229.667	2020.63	21.9003	33.2124	267.861	7.98424	2218.17	1992.43	460.476	2.56239	3.93576	28.9899	32.0691	244.307	7.8891	2161.75	1942.53	584.58	2.63582	3.97413	23.374	32.727		8.10095	2177.51	1884.81	327.467	3.25034	4.97739
1157	2020	8	18	17	229.708	2020.63	21.9331	33.2313	268.101	7.99031	2219.34	1990.14	453.089	2.59689	3.98822	29.3901	32.0204	240.847	7.88001	2159.59	1942.4	598.686	2.62381	3.95134	23.502	32.554		8.09784	2167.48	1877.69	329.29	3.22376	4.93691
1158	2020	8	18	18	229.75	2020.63	21.9832	33.2416	269.357	7.99038	2219.98	1990.26	453.082	2.60291	3.99683	29.5894	31.9708	238.138	7.87293	2157.38	1942.68	609.888	2.60295	3.91787	23.493	32.453		8.08672	2161.62	1879.41	339.228	3.14698	4.82063
1159	2020	8	18	19	229.792	2020.63	21.9344	33.1682	267.103	7.98646	2215.42	1988.81	457.286	2.57136	3.94954	29.6685	31.8613	237.369	7.87084	2152.51	1939.28	612.543	2.59015	3.89876	23.491	32.434		8.0856	2160.52	1879.18	340.189	3.13809	4.80727
1160	2020	8	18	20	229.833	2020.63	21.9374	33.1037	266.526	7.98253	2211.42	1987.4	461.594	2.54567	3.91061	29.6649	31.7882	235.994	7.86875	2149.26	1937.73	615.505	2.57304	3.87385	23.482	32.321		8.08249	2153.97	1875.85	342.521	3.10543	4.75868
1161	2020	8	18	21	229.875	2020.63	21.921	33.0854	261.344	7.9776	2210.29	1988.99	467.642	2.51869	3.86949	29.6739	31.8015	237.54	7.87067	2149.85	1937.22	612.405	2.5844	3.89069	23.491	31.785		8.07937	2122.89	1853.1	342.292	3.0214	4.63619
1162	2020	8	18	22	229.917	2020.63	21.908	33.1068	259.955	7.97768	2211.61	1990.15	467.754	2.5202	3.87176	29.6898	31.8136	236.463	7.87058	2150.39	1937.58	612.625	2.58654	3.89358	23.5	32.286		8.07726	2151.94	1876.97	347.383	3.07397	4.71064
1163	2020	8	18	23	229.958	2020.63	21.868	33.1819	261.683	7.97975	2216.27	1993.3	465.843	2.53465	3.89375	29.6939	31.8312	237.287	7.8715	2151.17	1937.73	611.228	2.59298	3.90303	23.515	32.239		8.07414	2149.22	1876.4	350.143	3.0525	4.6781
1164	2020	8	19	0	230	2020.63	21.8512	33.2071	260.279	7.97782	2217.84	1995.66	468.53	2.52666	3.88144	29.674	31.8333	236.758	7.87141	2151.26	1937.98	611.395	2.59091	3.90015	23.537	31.565		8.07502	2110.14	1845.01	345.125	2.97495	4.56702
1165	2020	8	19	1	230.042	2020.63	21.8349	33.2184	260.133	7.9779	2218.54	1996.33	468.546	2.52679	3.88171	29.6149	31.8231	238.523	7.87032	2150.81	1938.56	613.157	2.57923	3.88343	23.537	32.359		8.07091	2156.17	1883.43	354.072	3.05208	4.67576
1166	2020	8	19	2	230.083	2020.63	21.7609	33.2318	257.095	7.97397	2219.37	1999.48	473.701	2.50303	3.84587	29.5548	31.8121	238.51	7.87024	2150.32	1938.63	613.249	2.57229	3.87387	23.538	32.031		8.06279	2137.16	1872.79	360.13	2.96753	4.54999
1167	2020	8	19	3	230.125	2020.63	21.6521	33.2575	251.566	7.96504	2220.96	2005.91	485.549	2.45429	3.77189	29.4786	31.8061	239.257	7.87115	2150.05	1938.51	611.72	2.56919	3.87024	23.508	32.01		8.07668	2135.94	1864.65	346.259	3.03685	4.65693
1168	2020	8	19	4	230.167	2020.63	21.5689	33.2699	253.44	7.96912	2221.73	2005.19	480.354	2.46745	3.79288	29.3899	31.81	239.715	7.87307	2150.23	1938.35	608.616	2.5707	3.8736	23.568	32.14		8.07856	2143.48	1869.06	345.178	3.06972	4.70496
1169	2020	8	19	5	230.208	2020.63	21.5027	33.2906	251.277	7.97219	2223.02	2005.25	476.58	2.47832	3.8101	29.3079	31.8161	240.699	7.87398	2150.5	1938.7	607.186	2.56817	3.87076	23.534	32.186		8.07444	2146.14	1873.66	349.505	3.04946	4.67381
1170	2020	8	19	6	230.25	2020.63	21.2769	33.3526	255.049	7.97326	2226.86	2009.57	475.808	2.47029	3.79957	29.222	31.8194	241.471	7.87489	2150.65	1938.97	605.741	2.56502	3.86708	23.654	31.695		8.08033	2117.68	1847.18	340.728	3.03181	4.65114
1171	2020	8	19	7	230.292	2020.63	21.102	33.3112	258.264	7.97834	2224.29	2006.24	468.929	2.47461	3.80833	29.151	31.8202	242.473	7.87581	2150.68	1939.06	604.276	2.56303	3.86496	23.67	31.854		8.08521	2126.89	1851.64	337.002	3.08042	4.72348
1172	2020	8	19	8	230.333	2020.63	21.1184	33.2559	256.804	7.97541	2220.86	2004.67	472.123	2.45651	3.78077	29.1549	31.8181	243.097	7.87572	2150.59	1939	604.401	2.56278	3.86456	23.684	32.522		8.10309	2165.63	1871.74	324.091	3.26929	5.00441
1173	2020	8	19	9	230.375	2020.63	21.0771	33.275	254.552	7.97048	2222.05	2008.32	478.639	2.43205	3.74337	29.1968	31.8591	242.841	7.87464	2152.41	1940.67	606.455	2.56503	3.86699	23.688	32.011		8.09498	2136	1853.26	328.714	3.15674	4.83828
1174	2020	8	19	10	230.417	2020.63	21.2577	33.2803	262.103	7.98056	2222.38	2002.43	465.816	2.49535	3.8389	29.2342	31.8835	242.152	7.87255	2153.5	1942.27	610.054	2.56053	3.85947	23.675	31.862		8.10386	2127.36	1841.76	319.717	3.18571	4.88476
1175	2020	8	19	11	230.458	2020.63	21.2063	33.313	260.144	7.98163	2224.41	2003.97	464.776	2.49941	3.84541	29.2317	31.8859	240.66	7.87046	2153.6	1943.36	613.533	2.55043	3.84424	23.795	31.87		8.12075	2127.82	1831.68	304.661	3.29583	5.05176
1176	2020	8	19	12	230.5	2020.63	21.1711	33.2994	262.815	7.9797	2223.56	2004.46	467.081	2.4858	3.82494	29.346	31.9831	240.832	7.87138	2157.93	1945.56	612.656	2.57401	3.87731	23.975	32.439		8.11363	2160.81	1859.52	313.82	3.3512	5.12653
1177	2020	8	19	13	230.542	2020.63	21.2716	33.2312	263.579	7.97678	2219.33	2001.63	470.139	2.47356	3.80563	29.4089	32.0412	240.306	7.87129	2160.51	1947.21	613.185	2.58459	3.89182	24.134	32.336		8.11551	2154.84	1852.47	311.452	3.36588	5.14794
1178	2020	8	19	14	230.583	2020.63	21.4269	33.2085	265.698	7.98685	2217.92	1994.42	457.244	2.53246	3.89482	29.44	32.053	238.872	7.87021	2161.04	1947.93	615.065	2.58322	3.88923	23.764	32.325		8.1204	2154.2	1852.39	307.378	3.3521	5.13248
1179	2020	8	19	15	230.625	2020.63	21.3849	33.2364	265.917	7.98292	2219.65	1998.09	462.412	2.51303	3.86515	29.4969	32.0632	237.368	7.87236	2161.49	1946.85	611.518	2.59995	3.91358	23.515	32.098		8.12528	2141.04	1841.66	302.136	3.32241	5.09357
1180	2020	8	19	16	230.667	2020.63	21.353	33.2708	266.466	7.984	2221.79	1999.57	461.393	2.51901	3.87439	29.5244	32.0772	237.13	7.87752	2162.11	1944.66	603.084	2.62921	3.9571	23.746	32.665		8.11116	2173.92	1872.99	317.453	3.34186	5.11282
1181	2020	8	19	17	230.708	2020.63	21.3438	33.2861	265.28	7.98407	2222.74	2000.39	461.446	2.52019	3.87617	29.5199	32.0837	236.386	7.88568	2162.4	1940.93	589.871	2.67001	4.0185	23.53	32.616		8.11005	2171.08	1873.32	318.372	3.30515	5.0604
1182	2020	8	19	18	230.75	2020.63	21.2942	33.3378	265.569	7.98914	2225.94	2000.93	455.614	2.54563	3.91539	29.5714	32.0947	236.238	7.88884	2162.89	1939.4	584.853	2.69179	4.05047	23.571	32.494		8.10093	2164	1872.67	326.019	3.24101	4.96307
1183	2020	8	19	19	230.792	2020.63	21.2386	33.3621	274.943	8.00022	2227.45	1997.09	442.31	2.59691	3.99466	29.645	32.1573	237.963	7.89799	2165.68	1936.5	570.741	2.7513	4.13831	23.673	32.801		8.09482	2181.8	1889.05	333.418	3.25698	4.98241
1184	2020	8	19	20	230.833	2020.63	21.2552	33.3194	274.145	7.99729	2224.8	1996.24	445.465	2.57949	3.96804	29.6684	32.2273	237.87	7.90615	2168.79	1934.64	558.53	2.80237	4.21402	23.424	32.852		8.0877	2184.76	1897.48	340.703	3.19618	4.89232
1185	2020	8	19	21	230.875	2020.63	21.2352	33.2823	266.448	7.98636	2222.5	1999.87	458.557	2.52115	3.87882	29.6545	32.2549	236.673	7.90831	2170.02	1934.61	555.409	2.81489	4.23272	23.453	32.805		8.08258	2182.03	1897.98	345.362	3.16434	4.8437
1186	2020	8	19	22	230.917	2020.63	21.2978	33.2712	267.757	7.98544	2221.81	1999.29	459.602	2.52106	3.87811	29.6505	32.2404	235.024	7.90746	2169.38	1934.56	556.61	2.80871	4.22365	22.993	32.75		8.08747	2178.84	1896.63	340.626	3.13639	4.80781
1187	2020	8	19	23	230.958	2020.63	21.3665	33.2548	267.269	7.98551	2220.8	1997.91	459.351	2.5257	3.88467	29.6528	32.2254	234.765	7.91062	2168.71	1932.43	551.702	2.82398	4.24676	22.866	32.605		8.07935	2170.44	1895.56	347.699	3.06006	4.69408
1188	2020	8	20	0	231	2020.63	21.3514	33.2575	260.777	7.97858	2220.96	2001.53	468.09	2.49178	3.83264	29.5728	32.265	237.454	7.91878	2170.47	1930.22	539.74	2.86275	4.30575	22.96	32.675		8.07324	2174.5	1901.31	354.101	3.04484	4.66873
1189	2020	8	20	1	231.042	2020.63	21.4576	33.3208	263.703	7.98566	2224.89	2000.56	459.773	2.54156	3.90754	29.4307	32.3052	239.548	7.92394	2172.26	1930.02	532.461	2.87973	4.33287	22.568	32.527		8.08412	2165.92	1891.86	342.784	3.04592	4.67716
1190	2020	8	20	2	231.083	2020.63	21.4299	33.3123	261.288	7.97773	2224.36	2004.21	469.693	2.50042	3.84465	29.329	32.3222	240.806	7.92509	2173.01	1930.77	530.942	2.87731	4.33049	22.779	32.968		8.078	2191.48	1913.56	351.314	3.08866	4.73512
1191	2020	8	20	3	231.125	2020.63	21.441	33.3555	258.551	7.9788	2227.04	2005.83	468.74	2.51107	3.86056	29.2718	32.3212	240.187	7.92525	2172.97	1931.09	530.75	2.87231	4.32379	23.204	32.763		8.06789	2179.6	1906.24	359.86	3.0514	4.6746
1192	2020	8	20	4	231.167	2020.63	21.4589	33.4058	257.903	7.98188	2230.16	2006.79	465.321	2.53268	3.89318	29.2454	32.3205	240.15	7.92241	2172.94	1932.73	534.944	2.85457	4.29747	23.39	32.328		8.06777	2154.38	1884.91	357.104	3.01608	4.6229
1193	2020	8	20	5	231.208	2020.63	21.4569	33.4102	259.062	7.97995	2230.43	2007.98	467.802	2.52376	3.87945	29.2324	32.3281	241.088	7.92157	2173.28	1933.52	536.245	2.84957	4.29004	23.337	32.606		8.06665	2170.5	1898.65	360.022	3.03894	4.65548
1194	2020	8	20	6	231.25	2020.63	21.4549	33.4469	256.009	7.98302	2232.71	2008.37	464.262	2.54222	3.90755	29.2139	32.3412	241.199	7.92072	2173.86	1934.54	537.584	2.84456	4.28261	22.316	32.598		8.07454	2170.03	1902.34	352.711	2.97713	4.57395
1195	2020	8	20	7	231.292	2020.63	21.4275	33.4639	259.474	7.9851	2233.77	2008.43	461.816	2.55158	3.92209	29.2372	32.3554	242.032	7.91788	2174.49	1936.31	541.88	2.83331	4.26519	22.938	32.677		8.09942	2174.61	1887.13	328.928	3.18854	4.88935
1196	2020	8	20	8	231.333	2020.63	21.357	33.4408	257.849	7.97817	2232.33	2011.16	470.367	2.50975	3.85871	29.3031	32.3638	241.638	7.89004	2174.87	1950.12	584.894	2.69715	4.05925	22.421	32.724		8.09331	2177.34	1897.01	335.288	3.10599	4.76911
1197	2020	8	20	9	231.375	2020.63	21.3239	33.4169	258.643	7.97624	2230.85	2011.11	472.602	2.49518	3.83685	29.356	32.3608	239.721	7.88619	2174.73	1951.54	591.012	2.68253	4.03658	22.358	32.929		8.09619	2189.22	1905.24	333.811	3.14127	4.82186
1198	2020	8	20	10	231.417	2020.63	21.311	33.4146	264.177	7.98532	2230.71	2006.64	461.092	2.53701	3.90133	29.4133	32.3638	239.385	7.88635	2174.87	1951.15	590.745	2.68905	4.04558	23.444	32.671		8.11107	2174.26	1875.94	317.812	3.309	5.06688
1199	2020	8	20	11	231.458	2020.63	21.3494	33.4239	264.236	7.98239	2231.28	2008.28	464.855	2.52739	3.88606	29.1929	32.341	245.984	7.89551	2173.85	1947.41	576.126	2.71222	4.08365	22.339	32.952		8.11496	2190.56	1895.87	316.68	3.24859	4.98659
1200	2020	8	20	12	231.5	2020.63	21.427	33.4047	262.834	7.98446	2230.09	2005.7	462.056	2.54213	3.90806	28.9575	32.3421	249.91	7.90667	2173.9	1943.6	558.942	2.74654	4.13851	23.185	32.798		8.11384	2181.63	1882.27	316.208	3.31361	5.07614
1201	2020	8	20	13	231.542	2020.63	21.5418	33.4031	267.939	7.98754	2229.99	2003.25	458.182	2.56699	3.94507	28.8856	32.3643	249.814	7.91382	2174.89	1941.3	548.259	2.77846	4.18735	23.745	32.828		8.10972	2183.37	1881.1	319.654	3.35504	5.13104
1202	2020	8	20	14	231.583	2020.63	21.6149	33.4271	269.126	7.99261	2231.48	2001.41	452.103	2.60085	3.9961	28.9189	32.3848	249.869	7.91898	2175.8	1939.14	540.645	2.81043	4.23485	22.691	32.745		8.13061	2178.56	1874.57	301.534	3.35026	5.14008
1203	2020	8	20	15	231.625	2020.63	21.5886	33.4741	268.889	7.98968	2234.4	2005.48	456.16	2.58932	3.97829	28.9816	32.3932	249.728	7.92214	2176.17	1937.35	535.974	2.83394	4.2693	23.818	32.873		8.12349	2185.98	1874.44	307.476	3.45089	5.27596
1204	2020	8	20	16	231.667	2020.63	21.5981	33.4918	271.681	7.99676	2235.5	2002.77	447.606	2.62678	4.03559	29.047	32.3931	248.407	7.9203	2176.17	1937.8	538.653	2.83075	4.26357	23.55	32.865		8.11638	2185.51	1880.61	313.996	3.37754	5.16791
1205	2020	8	20	17	231.708	2020.63	21.6009	33.4913	267.997	7.98983	2235.47	2006.2	456.134	2.59302	3.98369	29.3698	32.3805	242.257	7.90945	2175.61	1940.48	554.652	2.80478	4.22011	23.177	32.751		8.10426	2178.9	1885.7	324.69	3.25122	4.98123
1206	2020	8	20	18	231.75	2020.63	21.5589	33.5032	266.53	7.9909	2236.2	2006.58	454.919	2.59577	3.98827	29.6083	32.3406	238.256	7.90261	2173.83	1940.79	564.753	2.78886	4.19329	23.733	32.663		8.08914	2173.8	1885.53	337.97	3.21309	4.91603
1207	2020	8	20	19	231.792	2020.64	21.3648	33.5424	267.555	7.99098	2238.64	2010.01	455.221	2.58291	3.97028	29.6805	32.2428	237.093	7.89977	2169.48	1938.31	568.496	2.77196	4.16795	23.721	32.677		8.08203	2174.61	1890.24	344.938	3.17327	4.85511
1208	2020	8	20	20	231.833	2020.64	21.2069	33.5265	272.934	7.99905	2237.65	2006.34	445.202	2.60635	4.00814	29.6579	32.1489	236.086	7.89693	2165.3	1936.64	572.35	2.74628	4.13069	23.484	32.535		8.07191	2166.38	1891.34	354.206	3.07411	4.70819
1209	2020	8	20	21	231.875	2020.64	21.3349	33.5023	271.624	7.99412	2236.15	2006.6	450.977	2.59119	3.98365	29.7066	32.1651	236.458	7.89408	2166.03	1938.27	576.898	2.73798	4.11735	23.091	32.468		8.07179	2162.49	1891.57	354.156	3.0248	4.6386
1210	2020	8	20	22	231.917	2020.64	21.7764	33.4052	271.677	7.9942	2230.12	1998.28	449.92	2.62087	4.02527	29.7506	32.1951	235.556	7.89024	2167.36	1940.9	583.169	2.72543	4.09755	22.947	32.874		8.07368	2186.03	1910.26	354.912	3.07051	4.70607
1211	2020	8	20	23	231.958	2020.64	22.2087	33.412	267.404	7.99027	2230.55	1997.35	454.731	2.64172	4.05243	29.768	32.2151	235.418	7.8904	2168.25	1941.4	583.04	2.72977	4.10363	22.655	32.951		8.07056	2190.5	1917.89	358.701	3.03288	4.6514
1212	2020	8	21	0	232	2020.64	22.3568	33.4707	258.043	7.97934	2234.19	2004.73	469.01	2.60786	3.99834	29.7681	32.2125	233.876	7.88955	2168.13	1941.72	584.368	2.72525	4.09685	22.877	32.742		8.06745	2178.38	1908.19	360.374	3.01302	4.62029
1213	2020	8	21	1	232.042	2020.64	22.3686	33.4779	262.013	7.98442	2234.63	2002.47	462.63	2.6347	4.0393	29.772	32.2158	233.208	7.88871	2168.28	1942.23	585.737	2.72164	4.09133	22.872	32.928		8.07233	2189.17	1914.08	356.646	3.062	4.69345
1214	2020	8	21	2	232.083	2020.64	22.3429	33.4762	260.071	7.97749	2234.53	2006.04	471.438	2.59812	3.98352	29.7551	32.233	234.213	7.88787	2169.05	1943.37	587.214	2.71733	4.0849	22.678	32.699		8.07021	2175.89	1906.35	357.438	3.0026	4.60735
1215	2020	8	21	3	232.125	2020.64	22.2683	33.4767	261.764	7.98456	2234.56	2003.09	462.458	2.62612	4.02729	29.6939	32.2461	235.404	7.88903	2169.63	1943.69	585.485	2.71855	4.08742	23.109	32.482		8.0681	2163.31	1894.05	357.924	3.00828	4.61287
1216	2020	8	21	4	232.167	2020.64	22.2222	33.4772	261.544	7.98263	2234.59	2004.42	464.908	2.6125	4.00691	29.6759	32.2402	234.954	7.89818	2169.37	1939.05	570.958	2.7631	4.15472	23.475	32.811		8.04598	2182.38	1918.07	382.766	2.96575	4.53938
1217	2020	8	21	5	232.208	2020.64	22.1669	33.4705	256.341	7.97571	2234.18	2007.94	473.706	2.57298	3.94694	29.6716	32.2324	233.07	7.90134	2169.02	1937.22	565.987	2.77823	4.17762	22.757	32.59		8.05687	2169.57	1907.85	370.259	2.92573	4.48956
1218	2020	8	21	6	232.25	2020.64	22.1739	33.4267	256.704	7.97578	2231.46	2005.6	473.191	2.56922	3.94147	29.6679	32.2236	233.787	7.9045	2168.63	1935.35	561.048	2.79339	4.20056	22.972	32.472		8.07275	2162.73	1892.2	353.307	3.01837	4.63023
1219	2020	8	21	7	232.292	2020.64	22.2686	33.4479	257.514	7.97885	2232.77	2004.46	469.434	2.595	3.97979	29.6966	32.2172	235.633	7.90666	2168.34	1933.83	557.671	2.80682	4.22042	23.067	32.688		8.07863	2175.25	1898.07	348.781	3.08718	4.73208
1220	2020	8	21	8	232.333	2020.64	22.249	33.4504	252.988	7.97593	2232.93	2006.19	473.216	2.57924	3.95582	29.7588	32.2186	237.504	7.90781	2168.41	1932.83	555.862	2.81914	4.23805	23.401	32.39		8.09752	2157.97	1871.34	328.727	3.18987	4.88838
1221	2020	8	21	9	232.375	2020.64	22.169	33.4165	251.131	7.966	2230.83	2009.93	485.826	2.52066	3.86711	29.815	32.2314	237.491	7.90597	2168.97	1933.79	558.726	2.8163	4.23285	23.135	32.26		8.1174	2150.43	1856.62	310.167	3.25746	4.99733
1222	2020	8	21	10	232.417	2020.64	22.1631	33.4019	257.376	7.96907	2229.92	2007.71	481.65	2.53328	3.88665	29.8403	32.2425	237.134	7.90413	2169.47	1934.92	561.616	2.81024	4.22327	23.355	32.065		8.10628	2139.13	1852.22	318.881	3.19209	4.89641
1223	2020	8	21	11	232.458	2020.64	22.1924	33.4003	256.614	7.96915	2229.82	2007.38	481.535	2.53606	3.89061	29.8457	32.264	237.463	7.90628	2170.43	1934.53	558.424	2.82411	4.24379	23.307	32.476		8.11517	2162.96	1866.07	313.179	3.29192	5.04505
1224	2020	8	21	12	232.5	2020.64	22.2223	33.3649	256.192	7.96722	2227.62	2006.28	483.707	2.5257	3.8747	29.87	32.334	238.546	7.91244	2173.54	1933.61	549.446	2.86571	4.30516	23.014	32.376		8.11405	2157.16	1864.73	313.855	3.24064	4.97179
1225	2020	8	21	13	232.542	2020.64	22.2894	33.3681	261.018	7.96929	2227.82	2004.94	481.016	2.54193	3.89884	29.8757	32.3588	237.696	7.9136	2174.64	1933.82	547.842	2.87483	4.31849	23.696	32.623		8.11394	2171.48	1869.96	314.766	3.34694	5.12186
1226	2020	8	21	14	232.583	2020.64	22.3707	33.3616	263.751	7.97837	2227.42	1999.52	469.218	2.59244	3.97546	29.9049	32.364	236.046	7.90976	2174.87	1935.75	553.687	2.85791	4.29259	24.815	32.255		8.09982	2150.14	1851.96	324.701	3.33837	5.09674
1227	2020	8	21	15	232.625	2020.64	22.4299	33.3167	264.521	7.98044	2224.63	1995.74	466.14	2.60301	3.9914	29.9778	32.3682	235.144	7.90391	2175.06	1938.34	562.638	2.8348	4.2568	24.496	32.705		8.1027	2176.24	1873.12	324.799	3.38053	5.16024
1228	2020	8	21	16	232.667	2020.64	22.5116	33.3126	266.47	7.98451	2224.38	1992.88	460.933	2.63001	4.03191	30.0463	32.3709	234.088	7.90207	2175.18	1938.86	565.462	2.8322	4.25189	24.719	32.78		8.10159	2180.58	1875.15	326.056	3.40894	5.19926
1229	2020	8	21	17	232.708	2020.64	22.5337	33.3149	264.803	7.97959	2224.52	1995.3	467.185	2.60805	3.99799	30.1158	32.3794	233.974	7.89723	2175.56	1941.1	573.044	2.81454	4.22429	24.717	32.176		8.07547	2145.56	1862.91	347.586	3.17757	4.85361
1230	2020	8	21	18	232.75	2020.64	22.6847	33.4039	264.338	7.98566	2230.04	1995.67	460.29	2.66174	4.07779	30.166	32.3945	233.059	7.89339	2176.23	1943.2	579.186	2.80088	4.20292	24.795	32.356		8.06835	2156	1874.33	355.704	3.16899	4.83719
1231	2020	8	21	19	232.792	2020.64	22.72	33.4058	262.113	7.98073	2230.16	1997.99	466.534	2.64073	4.04519	30.2134	32.4093	232.308	7.87054	2176.89	1954.8	616.62	2.68971	4.0353	24.851	32.399		8.06724	2158.49	1876.43	357.051	3.17418	4.84379
1232	2020	8	21	20	232.833	2020.64	22.713	33.39	260.394	7.97881	2229.18	1998.2	468.846	2.62882	4.02716	30.2275	32.4192	232.015	7.8757	2177.33	1952.49	608.06	2.71812	4.07762	24.788	31.841		8.06512	2126.14	1852.81	355.755	3.08421	4.71415
1233	2020	8	21	21	232.875	2020.64	22.6731	33.3833	255.87	7.97188	2228.77	2001.61	477.726	2.59048	3.96892	30.2354	32.4411	234.027	7.88986	2178.3	1946.09	585.08	2.79377	4.19076	24.748	32.093		8.05901	2140.75	1867.9	363.57	3.0784	4.70271
1234	2020	8	21	22	232.917	2020.64	22.6648	33.3837	256.199	7.97495	2228.79	2000.17	473.749	2.6048	3.99095	30.21	32.4591	235.424	7.90101	2179.11	1941.22	567.543	2.85142	4.27741	24.786	32.765		8.05989	2179.71	1897.62	366.923	3.17247	4.83781
1235	2020	8	21	23	232.958	2020.64	22.6027	33.394	260.419	7.98203	2229.43	1997.62	464.81	2.63507	4.03795	30.1752	32.4703	235.987	7.90717	2179.6	1938.7	558.091	2.88165	4.32313	24.745	32.902		8.05977	2187.66	1904.24	367.953	3.1848	4.85565
1236	2020	8	22	0	233	2020.64	22.569	33.395	257.004	7.9751	2229.49	2001.38	473.689	2.59806	3.9816	30.14	32.4751	235.624	7.91033	2179.82	1937.5	553.309	2.89539	4.34421	24.783	32.936		8.05466	2189.63	1908.32	373.492	3.16417	4.82326
1237	2020	8	22	1	233.042	2020.64	22.5238	33.4233	254.444	7.97317	2231.25	2004.13	476.461	2.58766	3.96592	30.125	32.4741	234.275	7.91049	2179.77	1937.5	553.075	2.89461	4.34328	25.031	32.861		8.04554	2185.28	1907.9	382.509	3.12969	4.76802
1238	2020	8	22	2	233.083	2020.64	22.4699	33.4442	257.058	7.97425	2232.54	2005.07	475.283	2.59029	3.97038	30.1079	32.4636	232.468	7.90664	2179.31	1939.25	558.918	2.87142	4.30883	25.034	32.648		8.04743	2172.93	1897.14	379.069	3.11391	4.74635
1239	2020	8	22	3	233.125	2020.64	22.5318	33.4416	255.483	7.97732	2232.38	2002.94	471.284	2.61066	4.00093	30.0923	32.4531	234.231	7.9088	2178.84	1937.9	555.551	2.88029	4.32249	25.004	32.805		8.04431	2182.03	1906.25	383.482	3.11297	4.74356
1240	2020	8	22	4	233.167	2020.64	22.553	33.4499	257.005	7.98039	2232.9	2001.67	467.424	2.62862	4.02815	30.0746	32.4528	234.88	7.91096	2178.83	1936.91	552.266	2.88996	4.33727	25.027	32.542		8.04619	2166.79	1893.04	379.684	3.09307	4.71588
1241	2020	8	22	5	233.208	2020.64	22.5346	33.4464	251.166	7.97347	2232.68	2005.09	476.301	2.59257	3.97314	30.0496	32.4574	236.16	7.91312	2179.03	1936.14	549.036	2.8994	4.35175	25.179	32.666		8.04708	2173.97	1896.95	379.449	3.12947	4.76779
1242	2020	8	22	6	233.25	2020.64	22.5033	33.4482	248.444	7.96654	2232.79	2008.85	485.381	2.55632	3.91792	30.017	32.4622	237.462	7.91427	2179.24	1935.95	547.341	2.90275	4.3572	25.16	32.689		8.05796	2175.31	1892.12	368.14	3.19176	4.86269
1243	2020	8	22	7	233.292	2020.64	22.2405	33.4704	248.672	7.96761	2234.17	2011.4	484.225	2.54046	3.89626	29.9919	32.4661	238.299	7.91543	2179.42	1935.67	545.638	2.90678	4.36358	25.097	32.666		8.06084	2173.97	1890	365.057	3.19846	4.87409
1244	2020	8	22	8	233.333	2020.64	22.0591	33.4926	251.166	7.97469	2235.55	2010.38	475.251	2.56076	3.92919	30.0357	32.4691	238.893	7.91359	2179.55	1936.4	548.404	2.90165	4.3552	25.125	32.599		8.07773	2170.09	1877.25	347.568	3.28975	5.01359
1245	2020	8	22	9	233.375	2020.64	22.1906	33.4563	251.504	7.97276	2233.29	2008.5	477.375	2.5593	3.92582	30.0408	32.4708	238.209	7.91274	2179.63	1936.86	549.688	2.89783	4.34937	25.162	32.552		8.07461	2167.36	1876.59	350.344	3.26959	4.98289
1246	2020	8	22	10	233.417	2020.64	22.0652	33.3525	252.526	7.97283	2226.86	2004.04	476.295	2.53734	3.89434	30.083	32.4698	236.081	7.9099	2179.58	1937.97	553.977	2.88683	4.33226	25.218	32.709		8.0875	2176.47	1875.78	338.586	3.37174	5.13575
1247	2020	8	22	11	233.458	2020.64	22.2006	33.3963	255.794	7.97691	2229.57	2003.28	471.448	2.57379	3.94844	30.085	32.4684	235.647	7.90906	2179.52	1938.34	555.256	2.88241	4.32561	25.111	32.65		8.10038	2173.05	1866.63	326.106	3.42821	5.22419
1248	2020	8	22	12	233.5	2020.64	21.995	33.3408	253.902	7.97698	2226.13	2001.91	470.857	2.54977	3.91427	30.0769	32.4651	235.514	7.91022	2179.37	1937.69	553.472	2.88744	4.33331	25.203	32.508		8.09526	2164.81	1862.48	330.033	3.3889	5.16465
1249	2020	8	22	13	233.542	2020.64	21.9697	33.3528	257.152	7.98105	2226.87	2000.7	465.789	2.56847	3.94315	30.0737	32.458	235.689	7.91237	2179.06	1936.36	550.145	2.89794	4.34919	25.126	32.565		8.06715	2168.12	1881.67	357.952	3.22451	4.91457
1250	2020	8	22	14	233.583	2020.64	21.9366	33.3634	259.834	7.98613	2227.53	1998.97	459.505	2.59129	3.97846	30.0953	32.4433	235.824	7.91253	2178.4	1935.61	549.798	2.89953	4.35144	24.992	32.545		8.06503	2166.96	1883.08	360.087	3.19549	4.87251
1251	2020	8	22	15	233.625	2020.64	21.8878	33.4016	259.949	7.9892	2229.9	1999.76	456.033	2.60608	4.00137	30.168	32.427	235.079	7.91269	2177.68	1934.42	549.397	2.90616	4.3605	24.88	32.728		8.05791	2177.57	1896.26	368.662	3.16661	4.82795
1252	2020	8	22	16	233.667	2020.64	21.8784	33.4037	254.468	7.98127	2230.03	2003.88	466.005	2.56687	3.94126	30.2281	32.4162	234.223	7.91485	2177.2	1932.47	546.015	2.92279	4.3847	24.782	32.721		8.0668	2177.16	1891.81	359.558	3.20564	4.88896
1253	2020	8	22	17	233.708	2020.64	21.8025	33.4249	255.631	7.98535	2231.35	2003.52	461.078	2.58213	3.96532	30.2768	32.4103	233.133	7.917	2176.93	1930.77	542.688	2.93882	4.40808	24.743	32.804		8.06268	2181.98	1898.19	364.322	3.18866	4.86267
1254	2020	8	22	18	233.75	2020.64	21.804	33.424	250.947	7.98442	2231.29	2003.92	462.235	2.57766	3.95845	30.34	32.4052	231.953	7.92016	2176.71	1928.46	537.877	2.96191	4.44183	24.731	32.83		8.05557	2183.48	1903.43	371.889	3.15045	4.80427
1255	2020	8	22	19	233.792	2020.64	21.801	33.4214	256.495	7.98949	2231.13	2001.28	455.868	2.60183	3.99563	30.404	32.4102	231.642	7.92632	2176.93	1924.9	528.737	3.00267	4.50192	24.673	32.483		8.05445	2163.36	1888.74	370.845	3.09454	4.72376
1256	2020	8	22	20	233.833	2020.64	21.8099	33.4302	260.789	7.99157	2231.68	2000.63	453.377	2.61376	4.01377	30.4549	32.419	232.088	7.93448	2177.32	1920.47	516.877	3.05395	4.57792	24.667	32.501		8.05133	2164.41	1891.31	374.231	3.07891	4.69978
1257	2020	8	22	21	233.875	2020.64	21.792	33.4236	253.156	7.98464	2231.27	2003.88	461.956	2.57761	3.95851	30.4608	32.4233	233.667	7.94363	2177.51	1915.65	503.858	3.10623	4.65614	24.596	32.439		8.05222	2160.81	1888.58	372.947	3.06869	4.68587
1258	2020	8	22	22	233.917	2020.64	21.797	33.4356	256.679	7.98971	2232.01	2001.93	455.726	2.6041	3.99903	30.4036	32.4339	234.981	7.94979	2177.98	1913.13	495.373	3.13595	4.70146	24.614	32.578		8.0481	2168.87	1897.02	378.194	3.06515	4.67863
1259	2020	8	22	23	233.958	2020.64	21.75	33.4322	255.339	7.98979	2231.8	2002.07	455.613	2.59983	3.99303	30.3027	32.4471	235.87	7.95095	2178.57	1913.75	493.947	3.133	4.69848	24.767	32.381		8.05298	2157.45	1884.12	371.641	3.08343	4.70668
1260	2020	8	23	0	234	2020.64	21.7589	33.4537	255.362	7.98986	2233.13	2003.07	455.718	2.60335	3.99815	30.151	32.4632	237.089	7.9481	2179.29	1917.04	498.131	3.10235	4.65471	24.8	32.425		8.05387	2160	1885.38	370.981	3.09728	4.72685
1261	2020	8	23	1	234.042	2020.64	21.6452	33.4226	251.634	7.98293	2231.2	2005.76	464.119	2.55611	3.92707	30.0278	32.4711	237.36	7.94726	2179.64	1918.74	499.472	3.08531	4.63095	24.89	32.46		8.04975	2162.03	1888.48	375.465	3.08825	4.7114
1262	2020	8	23	2	234.083	2020.64	21.6827	33.431	253.667	7.98801	2231.72	2003.4	457.828	2.58495	3.97091	29.9256	32.4734	237.849	7.94642	2179.74	1920.08	500.761	3.06999	4.60951	25.038	32.499		8.05764	2164.29	1884.71	367.358	3.15272	4.80718
1263	2020	8	23	3	234.125	2020.64	21.6917	33.429	252.477	7.98908	2231.6	2002.69	456.472	2.59077	3.97977	29.8678	32.4742	237.987	7.94458	2179.78	1921.55	503.4	3.05371	4.58595	25.093	32.72		8.05752	2177.11	1894.33	368.852	3.18605	4.8546
1264	2020	8	23	4	234.167	2020.64	21.709	33.4277	248.958	7.98415	2231.52	2004.95	462.62	2.56825	3.945	29.8218	32.4749	238.279	7.94373	2179.81	1922.39	504.632	3.04426	4.57245	25.148	31.904		8.0564	2129.79	1857.46	364.738	3.08166	4.70445
1265	2020	8	23	5	234.208	2020.64	21.7499	33.4326	251.374	7.98623	2231.82	2003.87	460.056	2.58251	3.96642	29.7917	32.4742	237.879	7.94289	2179.78	1923.05	505.842	3.03637	4.56106	25.179	32.096		8.05229	2140.93	1868.17	370.21	3.08656	4.70913
1266	2020	8	23	6	234.25	2020.64	21.745	33.4304	246.642	7.9763	2231.69	2008.7	472.619	2.53392	3.89186	29.7748	32.4733	237.342	7.94105	2179.74	1924.13	508.453	3.02433	4.54325	25.007	32.867		8.05117	2185.63	1905.25	376.551	3.15957	4.81383
1267	2020	8	23	7	234.292	2020.64	21.7087	33.4307	255.037	7.98837	2231.71	2003.01	457.364	2.58905	3.97692	29.7673	32.4707	237.059	7.94021	2179.62	1924.55	509.639	3.01864	4.53484	24.962	32.047		8.05706	2138.09	1865.12	365.121	3.08407	4.70896
1268	2020	8	23	8	234.333	2020.64	21.7043	33.4327	256.649	7.99145	2231.83	2001.61	453.57	2.60387	3.99973	29.8181	32.4683	235.888	7.93736	2179.51	1925.58	513.623	3.00807	4.51823	24.947	32.599		8.08594	2170.09	1874.1	339.694	3.31795	5.05926
1269	2020	8	23	9	234.375	2020.64	21.693	33.4292	250.868	7.98252	2231.61	2005.95	464.696	2.55909	3.93108	29.8689	32.4646	236.131	7.93352	2179.35	1927.1	519.068	2.99192	4.49325	25.042	32.108		8.08082	2141.62	1854.16	341.69	3.23386	4.93572
1270	2020	8	23	10	234.417	2020.64	21.7032	33.4236	258.916	7.98959	2231.27	2002.07	455.783	2.59372	3.98422	29.8933	32.4638	235.189	7.92568	2179.31	1931.01	530.456	2.95167	4.43245	24.969	32.601		8.10071	2170.21	1865.51	325.658	3.40754	5.1955
1271	2020	8	23	11	234.458	2020.64	21.7096	33.4166	257.96	7.98967	2230.83	2001.63	455.626	2.59389	3.98447	29.8974	32.4605	235.444	7.92183	2179.17	1932.87	536.107	2.93101	4.4014	25.073	32.059		8.08159	2138.78	1851.27	340.632	3.23512	4.93782
1272	2020	8	23	12	234.5	2020.64	21.7416	33.4107	258.378	7.98774	2230.47	2002.05	457.963	2.58675	3.9732	29.8886	32.4593	235.791	7.89799	2179.11	1945.16	572.529	2.80367	4.21032	25.131	31.726		8.07847	2119.47	1837.53	341.635	3.17975	4.85676
1273	2020	8	23	13	234.542	2020.64	21.7551	33.3988	260.973	7.99081	2229.73	1999.81	454.033	2.60166	3.99605	29.911	32.458	236.071	7.89915	2179.06	1944.36	570.687	2.81179	4.22221	25.115	32.508		8.09136	2164.81	1865.49	333.817	3.35608	5.11598
1274	2020	8	23	14	234.583	2020.64	21.834	33.3631	265.72	7.99589	2227.51	1994.84	447.453	2.6298	4.03871	29.9563	32.4162	234.491	7.89831	2177.2	1943.01	571.706	2.8079	4.21618	25.105	31.998		8.11724	2135.24	1828.04	307.287	3.43814	5.24802
1275	2020	8	23	15	234.625	2020.64	21.936	33.3253	265.095	7.99296	2225.17	1993.61	450.676	2.62051	4.02364	30.0128	32.3324	234.278	7.89946	2173.47	1939.11	569.309	2.81154	4.22178	25.229	31.95		8.11013	2132.46	1828.93	313.264	3.40324	5.19349
1276	2020	8	23	16	234.667	2020.64	21.9609	33.3072	259.515	7.98703	2224.05	1995.46	457.847	2.59176	3.97938	30.0751	32.2898	234.965	7.90362	2171.57	1935.06	562.521	2.83541	4.25722	25.189	32.816		8.09901	2182.67	1874.11	328.238	3.45141	5.25624
1277	2020	8	23	17	234.708	2020.64	22.0661	33.3	263.492	7.99311	2223.6	1991.27	450.236	2.63028	4.03743	30.2179	32.3707	235.023	7.90978	2175.17	1933.61	553.441	2.89017	4.33642	25.298	32.311		8.08489	2153.39	1858.8	338.722	3.31215	5.04872
1278	2020	8	23	18	234.75	2020.64	22.0407	33.3082	260.045	7.99118	2224.11	1992.84	452.691	2.61939	4.02093	30.2648	32.3961	234.323	7.91094	2176.3	1933.53	551.792	2.90358	4.35556	25.256	32.518		8.05678	2165.39	1884.24	368.198	3.17346	4.83543
1279	2020	8	23	19	234.792	2020.64	21.9807	33.3184	264.861	7.99725	2224.74	1990.77	445.35	2.645	4.06082	30.3037	32.4051	232.87	7.91009	2176.7	1933.98	553.1	2.9039	4.35537	25.245	32.142		8.05766	2143.59	1866.8	364.89	3.12917	4.77263
1280	2020	8	23	20	234.833	2020.64	22.0484	33.2852	266.124	7.99733	2222.68	1988.52	444.946	2.64787	4.06476	30.33	32.4096	231.634	7.91225	2176.9	1932.82	549.818	2.91858	4.37695	25.21	32.027		8.04754	2136.93	1867.34	374.705	3.05496	4.66132
1281	2020	8	23	21	234.875	2020.64	22.0959	33.2839	257.516	7.9854	2222.6	1994.07	459.646	2.59343	3.98067	30.3757	32.4265	231.11	7.91641	2177.65	1930.88	543.593	2.94735	4.41921	25.277	32.276		8.04943	2151.36	1877.12	374.306	3.10374	4.73177
1282	2020	8	23	22	234.917	2020.64	22.129	33.296	258.775	7.98847	2223.35	1992.91	455.915	2.61278	4.00991	30.3917	32.4413	230.956	7.91856	2178.31	1930.13	540.429	2.96216	4.44101	25.266	32.192		8.04631	2146.49	1875.07	377.056	3.07475	4.68873
1283	2020	8	23	23	234.958	2020.64	22.2431	33.3409	258.816	7.99055	2226.14	1993.32	453.726	2.63837	4.04751	30.3779	32.4542	232.757	7.92172	2178.89	1929.02	535.808	2.97921	4.46663	25.243	32.677		8.0412	2174.61	1900.16	385.803	3.10473	4.72907
1284	2020	8	24	0	235	2020.64	22.1957	33.3619	256.689	7.98962	2227.44	1995.21	455.079	2.63178	4.03775	30.278	32.4607	235.165	7.92488	2179.18	1928.35	531.266	2.98674	4.47935	25.259	32.787		8.03708	2180.99	1907.3	391.032	3.09716	4.71607
1285	2020	8	24	1	235.042	2020.64	22.1565	33.3677	254.418	7.98369	2227.8	1998.77	462.558	2.59975	3.98899	30.1779	32.4665	236.292	7.92604	2179.43	1928.71	529.689	2.98326	4.47558	25.273	32.198		8.03396	2146.84	1881.93	390.385	3.00865	4.58776
1286	2020	8	24	2	235.083	2020.64	22.099	33.3518	258.35	7.98877	2226.81	1995.85	456.07	2.61765	4.01723	30.0744	32.4679	236.738	7.92519	2179.5	1930.01	531.031	2.9681	4.45437	25.263	32.32		8.03585	2153.91	1886.59	389.175	3.03295	4.62353
1287	2020	8	24	3	235.125	2020.64	22.074	33.3219	256.883	7.98684	2224.96	1995.47	458.201	2.60265	3.99474	29.992	32.4691	237.165	7.92535	2179.55	1930.6	530.88	2.96058	4.4443	25.262	32.189		8.03273	2146.32	1882.26	391.681	2.99973	4.57441
1288	2020	8	24	4	235.167	2020.64	22.0993	33.3123	251.752	7.97991	2224.36	1998.23	466.831	2.57017	3.94469	29.9249	32.4705	237.424	7.92351	2179.61	1932.13	533.664	2.94384	4.42015	25.32	32.219		8.03562	2148.06	1881.63	388.695	3.02504	4.61187
1289	2020	8	24	5	235.208	2020.64	22.1713	33.3304	253.715	7.98199	2225.48	1997.59	464.361	2.58868	3.97216	29.8693	32.4733	237.491	7.92167	2179.74	1933.61	536.458	2.92849	4.39789	25.316	32.557		8.0475	2167.65	1890.63	378.17	3.13256	4.77181
1290	2020	8	24	6	235.25	2020.64	22.178	33.3382	250.218	7.97506	2225.97	2001.38	473.269	2.55655	3.92272	29.823	32.4779	237.685	7.91882	2179.94	1935.6	540.758	2.90897	4.36919	25.35	32.066		8.04138	2139.19	1871.3	381.406	3.04058	4.63696
1291	2020	8	24	7	235.292	2020.64	22.2272	33.386	252.013	7.98313	2228.93	1999.46	463.422	2.60542	3.99675	29.814	32.4789	237.823	7.91498	2179.99	1937.7	546.541	2.88762	4.33725	25.279	31.859		8.03627	2127.18	1865.11	385.555	2.9798	4.54772
1292	2020	8	24	8	235.333	2020.64	22.2246	33.388	251.62	7.98321	2229.06	1999.55	463.348	2.60576	3.99729	29.8361	32.4847	238.99	7.91314	2180.24	1938.68	549.346	2.8806	4.32633	25.314	31.747		8.04415	2120.69	1855.53	376.358	3.01198	4.59774
1293	2020	8	24	9	235.375	2020.64	22.225	33.4018	255.046	7.98428	2229.91	1999.71	462.123	2.61257	4.00761	29.8496	32.5022	239.027	7.91129	2181.02	1940.13	552.242	2.87387	4.31582	25.325	31.387		8.06003	2099.82	1830.59	357.638	3.05378	4.66603
1294	2020	8	24	10	235.417	2020.64	22.2523	33.4171	257.476	7.98635	2230.86	1999.25	459.653	2.62694	4.02922	29.8479	32.5107	238.614	7.90945	2181.4	1941.38	555.11	2.86474	4.30205	25.394	31.664		8.07692	2115.88	1833.42	342.566	3.19086	4.87074
1295	2020	8	24	11	235.458	2020.65	22.1149	33.366	261.403	7.98743	2227.69	1997.13	457.868	2.61408	4.01145	29.8599	32.5122	237.018	7.90761	2181.47	1942.29	557.935	2.85634	4.28924	25.443	32.215		8.0598	2147.83	1867.3	362.995	3.17154	4.83348
1296	2020	8	24	12	235.5	2020.65	22.1945	33.3304	259.647	7.9835	2225.48	1996.67	462.446	2.59816	3.98644	29.8719	32.5121	236.137	7.90777	2181.46	1942.12	557.684	2.85836	4.29211	25.445	32.161		8.07569	2144.69	1856.02	346.69	3.25508	4.96145
1297	2020	8	24	13	235.542	2020.65	22.1787	33.3158	260.253	7.98957	2224.58	1993	454.719	2.6249	4.02778	29.9049	32.5114	235.572	7.90892	2181.43	1941.25	555.877	2.86773	4.3057	25.563	32.585		8.07657	2169.28	1873.53	348.245	3.32931	5.0674
1298	2020	8	24	14	235.583	2020.65	22.2554	33.3101	261.71	7.99065	2224.23	1991.6	453.318	2.63657	4.04488	29.9817	32.5196	235.726	7.91208	2181.8	1939.32	551.046	2.89305	4.34252	25.775	32.55		8.07745	2167.25	1869.64	346.968	3.35333	5.10113
1299	2020	8	24	15	235.625	2020.65	22.3345	33.2605	266.964	7.99672	2221.15	1985.41	445.387	2.66844	4.09332	30.0723	32.5231	235.187	7.91524	2181.95	1937.11	546.205	2.9195	4.38084	25.813	32.642		8.07534	2172.58	1874.63	349.582	3.3574	5.10557
1300	2020	8	24	16	235.667	2020.65	22.5022	33.2017	267.432	7.99579	2217.5	1981.61	445.943	2.67271	4.09848	30.114	32.5242	232.208	7.9114	2182	1938.83	552.007	2.90324	4.35581	25.938	32.647		8.07022	2172.87	1876.71	354.629	3.34189	5.07999
1301	2020	8	24	17	235.708	2020.65	22.6139	33.2423	264.832	7.99387	2220.02	1983.81	448.634	2.67802	4.10497	30.249	32.4929	232.146	7.91155	2180.61	1936.65	551.459	2.91474	4.37144	25.887	32.596		8.0561	2169.92	1882.85	368.866	3.24756	4.93798
1302	2020	8	24	18	235.75	2020.65	22.6676	33.2738	264.197	7.99494	2221.97	1984.46	447.583	2.69195	4.12543	30.087	32.4951	239.707	7.91371	2180.71	1936.84	548.333	2.91006	4.36677	25.863	32.56		8.02999	2167.83	1895.87	396.842	3.09275	4.70335
1303	2020	8	24	19	235.792	2020.65	22.7949	33.3304	264.475	7.99501	2225.48	1986.33	447.959	2.71063	4.15206	29.6496	32.5094	252.099	7.92087	2181.34	1936.94	538.043	2.90541	4.36601	25.816	32.47		8.02487	2162.61	1894.91	401.98	3.04843	4.63764
1304	2020	8	24	20	235.833	2020.65	22.834	33.3337	260.983	7.98909	2225.69	1989.22	455.31	2.68483	4.11207	29.7963	32.5048	248.273	7.92603	2181.14	1932.97	530.271	2.94766	4.42739	25.781	32.68		8.02076	2174.79	1907.04	408.175	3.04799	4.63508
1305	2020	8	24	21	235.875	2020.65	22.7782	33.3254	255.994	7.98616	2225.17	1990.71	458.91	2.6641	4.08102	30.1528	32.5308	240.187	7.92918	2182.3	1929.43	525.478	3.00431	4.50678	25.781	32.646		8.01964	2172.82	1906.08	409.207	3.0377	4.61981
1306	2020	8	24	22	235.917	2020.65	22.7121	33.2968	258.69	7.99123	2223.4	1987.18	452.344	2.6801	4.10655	30.224	32.5575	237.463	7.93034	2183.48	1929.17	523.877	3.02079	4.53011	25.79	32.783		8.01952	2180.76	1912.36	410.322	3.05474	4.64407
1307	2020	8	24	23	235.958	2020.65	22.7193	33.3025	257.621	7.98731	2223.75	1989.4	457.281	2.66181	4.07838	30.1854	32.5741	237.34	7.9305	2184.22	1929.95	523.781	3.01928	4.52825	25.773	32.788		8.02241	2181.05	1911.16	407.069	3.06952	4.66672
1308	2020	8	25	0	236	2020.65	22.7593	33.2979	253.023	7.98438	2223.47	1990.34	460.9	2.65043	4.06054	30.0915	32.5871	237.826	7.92965	2184.8	1931.57	525.173	3.00614	4.50982	25.745	32.795		8.01629	2181.45	1915.02	414.173	3.03377	4.61268
1309	2020	8	25	1	236.042	2020.65	22.722	33.2987	249.161	7.97645	2223.52	1994.63	470.997	2.60801	3.99597	30.0322	32.5917	237.219	7.92881	2185	1932.64	526.485	2.99581	4.49516	25.715	32.795		8.00617	2181.45	1920.69	426.059	2.97559	4.52463
1310	2020	8	25	2	236.083	2020.65	22.6889	33.3003	254.238	7.98453	2223.62	1990.92	460.757	2.64495	4.05293	30.0009	32.5949	236.695	7.92797	2185.15	1933.43	527.766	2.98827	4.48428	25.687	32.771		8.00606	2180.06	1919.87	426.035	2.96925	4.51564
1311	2020	8	25	3	236.125	2020.65	22.6425	33.2914	252.647	7.9816	2223.07	1992.28	464.382	2.62526	4.02334	29.9534	32.5963	237.526	7.92913	2185.21	1933.24	526.125	2.98981	4.48729	25.66	32.81		7.99694	2182.32	1926.72	437.301	2.9222	4.44403
1312	2020	8	25	4	236.167	2020.65	22.6221	33.3231	254.019	7.98767	2225.03	1991	457.039	2.65697	4.07189	29.8897	32.6016	237.692	7.93028	2185.45	1933.3	524.526	2.99006	4.48856	25.656	32.263		7.97883	2150.61	1910.64	455.3	2.76386	4.20895
1313	2020	8	25	5	236.208	2020.65	22.6097	33.3269	248.657	7.97975	2225.27	1995.27	467.078	2.61707	4.01085	29.8299	32.6053	238.037	7.92944	2185.61	1934.34	525.831	2.97963	4.47376	25.718	32.817		7.98271	2182.73	1934.06	454.922	2.85345	4.33865
1314	2020	8	25	6	236.25	2020.65	22.5813	33.3387	251.282	7.98482	2226	1993.54	460.772	2.64079	4.04744	29.7949	32.607	237.969	7.9286	2185.69	1935.11	527.102	2.97159	4.46219	25.676	32.737		7.99159	2178.09	1926.02	443.254	2.88683	4.3908
1315	2020	8	25	7	236.292	2020.65	22.5519	33.3673	246.529	7.98189	2227.77	1996.7	464.742	2.62681	4.0261	29.7738	32.6119	239.262	7.92876	2185.9	1935.36	526.919	2.97076	4.4612	25.737	32.632		7.99348	2172	1919.69	440.078	2.89058	4.39681
1316	2020	8	25	8	236.333	2020.65	22.5105	33.4131	250.033	7.98497	2230.61	1997.81	461.295	2.64328	4.0514	29.8006	32.6201	240.026	7.92691	2186.27	1936.4	529.642	2.96431	4.45102	25.759	32.197		8.04536	2146.78	1871.8	377.719	3.12172	4.75324
1317	2020	8	25	9	236.375	2020.65	22.4387	33.4363	249.834	7.98104	2232.05	2001.51	466.5	2.61988	4.01615	29.8132	32.6276	239.724	7.92407	2186.6	1938.05	533.864	2.95092	4.43065	25.82	32.729		8.06525	2177.63	1884.24	360.302	3.31055	5.03316
1318	2020	8	25	10	236.417	2020.65	22.4149	33.418	254.672	7.98811	2230.92	1997.19	457.417	2.65064	4.06373	29.833	32.6318	239.338	7.91623	2186.79	1942.15	545.58	2.91108	4.37049	25.878	32.628		8.06513	2171.77	1879.27	359.743	3.30298	5.022
1319	2020	8	25	11	236.458	2020.65	22.3391	33.4344	252.055	7.98719	2231.94	1999.07	458.747	2.64091	4.04952	29.8487	32.6323	237.422	7.91338	2186.81	1943.52	549.871	2.8975	4.34987	25.994	32.588		8.03801	2169.45	1891.67	388.068	3.155	4.79578
1320	2020	8	25	12	236.5	2020.65	22.1949	33.4595	252.148	7.98326	2233.49	2003.41	463.956	2.61116	4.00529	29.833	32.6308	236.737	7.91354	2186.74	1943.51	549.636	2.8966	4.34878	26.192	32.445		8.0389	2161.16	1883.06	385.973	3.16292	4.8066
1321	2020	8	25	13	236.542	2020.65	22.0343	33.3858	261.812	7.99333	2228.92	1995.78	450.744	2.63801	4.0489	29.8709	32.6293	236.725	7.9147	2186.68	1942.57	547.841	2.90649	4.36308	26.095	32.539		8.03378	2166.61	1890.94	392.303	3.13573	4.76558
1322	2020	8	25	14	236.583	2020.65	22.0992	33.4087	262.994	7.99741	2230.34	1994.4	445.942	2.66675	4.09208	29.901	32.6266	236.764	7.91586	2186.56	1941.64	546.051	2.91549	4.37618	25.909	32.391		8.08566	2158.03	1856.67	337.882	3.39534	5.16496
1323	2020	8	25	15	236.625	2020.65	22.0362	33.4188	261.44	7.99448	2230.97	1996.88	449.632	2.64753	4.0632	29.9658	32.6229	236.459	7.91301	2186.39	1942.5	550.279	2.90646	4.36172	26.051	32.764		8.06655	2179.66	1883.08	358.97	3.34837	5.08665
1324	2020	8	25	16	236.667	2020.65	22.3037	33.4456	264.004	8.00055	2232.63	1993.12	442.384	2.70568	4.14914	29.9969	32.6134	235.728	7.91017	2185.97	1943.41	554.529	2.89349	4.3419	26.305	32.755		8.06443	2179.13	1881.7	360.842	3.36302	5.10503
1325	2020	8	25	17	236.708	2020.65	22.514	33.3915	261.202	7.99663	2229.27	1990.77	446.62	2.69942	4.1376	30.0189	32.6168	235.685	7.91333	2186.12	1941.72	549.718	2.91295	4.37075	26.314	32.747		8.01532	2178.67	1908.74	414.513	3.08163	4.67784
1326	2020	8	25	18	236.75	2020.65	22.7082	33.3291	260.542	7.9907	2225.4	1989.12	453.3	2.68071	4.10723	30.0339	32.6093	235.352	7.91549	2185.79	1940.23	546.392	2.92534	4.3892	26.252	32.775		7.9792	2180.29	1929.8	458.684	2.88289	4.3767
1327	2020	8	25	19	236.792	2020.65	22.7028	33.3439	260.162	7.98977	2226.32	1990.39	454.588	2.67723	4.10184	30.0148	32.596	234.969	7.91764	2185.2	1938.79	543.078	2.93371	4.4022	26.223	32.546		7.97108	2167.02	1923.54	467.193	2.81115	4.27055
1328	2020	8	25	20	236.833	2020.65	22.6248	33.3711	260.308	7.99185	2228.01	1991.32	452.286	2.68343	4.11199	29.9975	32.5961	236.263	7.9248	2185.2	1935.17	532.435	2.97074	4.45801	26.232	32.683		7.95597	2174.96	1937.61	488.265	2.74977	4.17579
1329	2020	8	25	21	236.875	2020.65	22.589	33.3736	259.632	7.98892	2228.16	1993.2	455.956	2.66576	4.08531	30.015	32.619	237.058	7.92896	2186.22	1933.62	526.447	2.99754	4.49771	26.287	32.649		7.96185	2172.99	1932.6	480.096	2.78139	4.22344
1330	2020	8	25	22	236.917	2020.65	22.495	33.3663	257.653	7.98799	2227.71	1994	457.071	2.65167	4.06484	30.004	32.6397	237.421	7.93211	2187.14	1932.73	521.979	3.01581	4.52505	26.185	32.541		7.97173	2166.73	1923.26	466.334	2.81025	4.26974
1331	2020	8	25	23	236.958	2020.65	22.4236	33.3654	256.993	7.98907	2227.66	1993.96	455.743	2.65032	4.0636	29.9629	32.6555	237.501	7.93427	2187.84	1932.44	518.988	3.02499	4.53927	26.196	32.51		7.96462	2164.93	1925.36	475.305	2.77111	4.21045
1332	2020	8	26	0	237	2020.65	22.3795	33.3769	254.086	7.98614	2228.37	1996.35	459.518	2.63307	4.03754	29.9197	32.6603	237.679	7.93643	2188.06	1931.79	515.95	3.03287	4.55169	26.198	32.496		7.9605	2164.12	1926.78	480.601	2.74869	4.1765
1333	2020	8	26	1	237.042	2020.65	22.2287	33.3086	250.523	7.98121	2224.13	1996.43	465.125	2.58771	3.97022	29.901	32.6584	236.332	7.93459	2187.97	1932.86	518.608	3.02054	4.5335	25.932	32.829		7.96839	2183.43	1940.38	473.257	2.80109	4.25614
1334	2020	8	26	2	237.083	2020.65	22.2367	33.3071	253.189	7.98529	2224.04	1994.27	459.974	2.60816	4.00153	29.889	32.656	236.982	7.93674	2187.87	1931.72	515.504	3.03095	4.54933	25.938	32.865		7.96327	2185.51	1944.65	480.285	2.77932	4.22263
1335	2020	8	26	3	237.125	2020.65	22.2597	33.297	251.198	7.98136	2223.41	1995.54	464.824	2.58995	3.97342	29.853	32.662	238.504	7.9389	2188.13	1931.05	512.487	3.03971	4.56297	25.973	32.556		7.96015	2167.6	1931.45	481.701	2.73218	4.15366
1336	2020	8	26	4	237.167	2020.65	22.2639	33.3024	249.292	7.97943	2223.75	1996.74	467.319	2.58154	3.96043	29.8262	32.6651	238.651	7.94006	2188.27	1930.75	510.882	3.04362	4.56921	26.063	32.434		7.96204	2160.52	1924.1	478.109	2.73665	4.16056
1337	2020	8	26	5	237.208	2020.65	22.2467	33.3479	251.322	7.98251	2226.57	1997.67	463.854	2.59994	3.98846	29.7927	32.6667	239.169	7.94022	2188.34	1930.98	510.699	3.04113	4.56597	25.78	32.743		7.96392	2178.44	1939.78	478.451	2.75383	4.18713
1338	2020	8	26	6	237.25	2020.65	22.2094	33.347	251.179	7.98258	2226.51	1997.87	463.76	2.59683	3.9841	29.7329	32.6713	239.655	7.94237	2188.55	1930.46	507.723	3.04727	4.57604	25.862	32.477		7.96181	2163.02	1927.73	478.888	2.72119	4.13915
1339	2020	8	26	7	237.292	2020.65	22.2215	33.396	251.355	7.98665	2229.55	1998.25	459.089	2.62328	4.02413	29.7089	32.6766	240.665	7.94053	2188.78	1931.81	510.386	3.03508	4.55804	25.866	32.289		7.95169	2152.12	1923.88	490.68	2.65017	4.03298
1340	2020	8	26	8	237.333	2020.65	22.2177	33.3953	247.527	7.98173	2229.51	2000.71	465.291	2.59869	3.98646	29.7268	32.6823	241.765	7.93869	2189.04	1932.85	513.025	3.02735	4.54609	25.91	32.216		7.95357	2147.88	1919.17	487.486	2.65555	4.04139
1341	2020	8	26	9	237.375	2020.65	22.1585	33.4161	250.84	7.9858	2230.8	2000.18	460.359	2.61556	4.01282	29.7629	32.6848	240.887	7.93584	2189.15	1934.17	517.077	3.0157	4.52802	25.852	32.464		7.95546	2162.26	1930.37	487.198	2.68687	4.08721
1342	2020	8	26	10	237.417	2020.65	22.1444	33.4264	250.764	7.98087	2231.44	2003.28	466.681	2.5913	3.97566	29.7818	32.6864	239.105	7.932	2189.22	1936.11	522.618	2.99672	4.49922	25.832	32.606		7.96734	2170.5	1931.22	472.77	2.76092	4.19863
1343	2020	8	26	11	237.458	2020.65	21.9875	33.4736	248.716	7.97973	2234.37	2007.44	468.612	2.57673	3.95462	29.7933	32.6892	238.726	7.93016	2189.34	1937.1	525.304	2.9881	4.48608	25.925	32.685		7.97322	2175.08	1931.21	465.776	2.80913	4.26991
1344	2020	8	26	12	237.5	2020.65	21.9332	33.481	247.443	7.97559	2234.83	2010.27	474	2.55262	3.91815	29.8052	32.691	237.111	7.92832	2189.42	1938.04	527.996	2.97944	4.47288	25.95	32.721		7.98811	2177.16	1924.97	447.257	2.89374	4.39781
1345	2020	8	26	13	237.542	2020.65	21.914	33.4874	248.01	7.97844	2235.22	2009.33	470.398	2.56539	3.9379	29.8436	32.6911	237.28	7.93247	2189.43	1935.54	521.904	3.0062	4.51247	25.848	32.805		7.98699	2182.03	1930.25	449.382	2.88748	4.38877
1346	2020	8	26	14	237.583	2020.65	21.6471	33.5164	256.131	7.9923	2237.02	2005.9	453.295	2.61203	4.01218	29.9604	32.6785	237.393	7.93463	2188.87	1933.05	518.603	3.02902	4.54509	25.762	32.778		7.99488	2180.47	1925.53	439.501	2.91762	4.43604
1347	2020	8	26	15	237.625	2020.65	21.8587	33.5019	265.468	7.99916	2236.12	2000.1	444.71	2.66368	4.08927	30.1279	32.6627	236.404	7.93522	2188.16	1930.88	517.505	3.04828	4.5716	26.016	32.82		7.98476	2182.9	1930.81	452.185	2.8941	4.39643
1348	2020	8	26	16	237.667	2020.65	22.0948	33.439	265.961	7.99901	2232.22	1995.17	444.26	2.67775	4.10875	30.2775	32.6489	235.155	7.93281	2187.55	1930.53	520.767	3.04926	4.57092	25.96	32.45		7.98064	2161.45	1916.15	454.381	2.82409	4.29468
1349	2020	8	26	17	237.708	2020.65	22.102	33.4407	252.101	7.98887	2232.33	2000.33	456.763	2.62822	4.03265	30.3108	32.6414	233.407	7.93239	2187.22	1930.24	521.29	3.04972	4.57119	25.966	32.52		7.96653	2165.51	1926.59	473.023	2.75992	4.19628
1350	2020	8	26	18	237.75	2020.65	22.0491	33.4484	260.682	7.97972	2232.8	2005.69	468.37	2.57951	3.95842	30.3209	32.6185	231.847	7.93298	2186.2	1929.07	520.298	3.05174	4.57431	25.958	32.405		7.94441	2158.84	1932.28	501.574	2.63541	4.00823
1351	2020	8	26	19	237.792	2020.65	21.7481	33.48	262.965	7.99558	2234.76	2001.63	448.904	2.63337	4.04415	30.0466	32.5956	239.561	7.93757	2185.18	1928	513.833	3.04597	4.57016	25.968	32.386		7.93829	2157.74	1934.31	509.844	2.60426	3.96092
1352	2020	8	26	20	237.833	2020.65	21.723	33.4751	259.493	7.98344	2234.46	2007.64	463.967	2.57115	3.94891	30.0869	32.5915	243.33	7.94715	2185	1922.38	500.216	3.10337	4.6557	26.512	32.75		7.93618	2178.84	1948.64	515.99	2.68364	4.07119
1353	2020	8	26	21	237.875	2020.65	21.785	33.399	262.143	7.99029	2229.74	1999.85	454.675	2.60183	3.99599	30.2938	32.6182	240.183	7.95374	2186.18	1918.03	491.01	3.16573	4.74562	26.31	32.868		7.93306	2185.69	1957.27	521.621	2.66195	4.03966
1354	2020	8	26	22	237.917	2020.65	21.8059	33.3787	257.357	7.98115	2228.48	2003.2	465.939	2.55709	3.92722	30.4047	32.6393	237.474	7.95633	2187.12	1916.42	487.45	3.19484	4.78721	26.359	32.842		7.92795	2184.18	1958.22	528.689	2.63831	4.00343
1355	2020	8	26	23	237.958	2020.65	21.902	33.3732	262.354	7.99001	2228.14	1997.8	454.771	2.60819	4.00469	30.4285	32.6603	236.496	7.95991	2188.06	1914.94	482.646	3.22034	4.82476	26.368	32.756		7.92583	2179.19	1955.11	530.911	2.61952	3.97562
1356	2020	8	27	0	238	2020.65	21.8234	33.3778	256.802	7.98086	2228.42	2003.16	466.292	2.55717	3.92716	30.31	32.677	237.867	7.9605	2188.8	1916.14	482.069	3.21246	4.81469	26.539	32.653		7.93471	2173.22	1944.58	517.136	2.66829	4.04851
1357	2020	8	27	1	238.042	2020.65	21.7449	33.4225	256.637	7.97972	2231.2	2006.61	468.179	2.54948	3.91582	30.186	32.6837	238.277	7.96109	2189.1	1917.05	481.445	3.20295	4.80237	26.379	32.264		7.9326	2150.67	1928.34	516.518	2.60092	3.95209
1358	2020	8	27	2	238.083	2020.65	21.5016	33.3495	253.616	7.97657	2226.67	2006.17	471.516	2.50517	3.85091	30.1069	32.685	238.19	7.96268	2189.16	1916.87	479.397	3.20356	4.80455	26.481	32.684		7.93448	2175.02	1946.59	517.784	2.66508	4.04406
1359	2020	8	27	3	238.125	2020.65	21.5957	33.3038	252.319	7.97643	2223.83	2003.19	471.254	2.50788	3.85447	30.0657	32.6826	237.876	7.96326	2189.05	1916.8	478.639	3.20218	4.80316	26.201	32.82		7.94736	2182.9	1948.64	501.197	2.7183	4.12703
1360	2020	8	27	4	238.167	2020.65	21.756	33.275	251.698	7.97329	2222.05	2002.07	474.996	2.50396	3.847	30.027	32.6801	238.122	7.96485	2188.94	1916.15	476.54	3.20681	4.81077	25.926	32.866		7.93925	2185.57	1956.91	513.019	2.65677	4.03657
1361	2020	8	27	5	238.208	2020.65	21.7033	33.199	245.935	7.96714	2217.33	2001.5	482.22	2.4624	3.78431	29.979	32.6771	238.174	7.96644	2188.8	1915.57	474.456	3.21038	4.81694	25.592	32.964		7.92713	2191.25	1969.98	531.33	2.57696	3.91839
1362	2020	8	27	6	238.25	2020.65	21.9316	33.2096	248.838	7.972	2217.99	1998.05	476.006	2.50629	3.84928	29.9106	32.6764	238.673	7.96902	2188.77	1914.67	471.089	3.21772	4.82907	25.49	32.892		7.93102	2187.08	1965.39	525.081	2.57904	3.92342
1363	2020	8	27	7	238.292	2020.65	22.0639	33.2108	249.109	7.97486	2218.07	1995.75	472.327	2.5317	3.88687	29.9157	32.6748	238.845	7.96961	2188.7	1914.25	470.298	3.2215	4.83468	25.644	32.83		7.9259	2183.48	1963.82	531.785	2.56169	3.89578
1364	2020	8	27	8	238.333	2020.65	22.3089	33.3076	249.181	7.98571	2224.07	1993.54	459.431	2.61686	4.01407	29.9698	32.6745	239.773	7.9682	2188.69	1914.58	472.11	3.21925	4.83043	25.651	32.498		7.93178	2164.23	1945.07	520.149	2.55584	3.88993
1365	2020	8	27	9	238.375	2020.65	22.257	33.3078	250.692	7.98457	2224.08	1994.51	460.88	2.60656	3.99883	30.023	32.6736	239.67	7.96579	2188.65	1915.45	475.26	3.21108	4.81731	25.599	32.487		7.95367	2163.6	1934.21	489.908	2.65687	4.04444
1366	2020	8	27	10	238.417	2020.65	22.2274	33.3433	247.437	7.97542	2226.28	2001.1	472.843	2.56327	3.93245	30.0489	32.6735	238.705	7.95737	2188.64	1919.87	486.586	3.16565	4.74875	25.476	32.744		7.96455	2178.5	1941.8	477.783	2.72819	4.15196
1367	2020	8	27	11	238.458	2020.65	22.1707	33.3696	247.127	7.97428	2227.92	2003.43	474.577	2.55552	3.92096	29.6345	32.6389	247.496	7.96496	2187.1	1917.91	476.597	3.1604	4.74786	25.277	32.744		7.98144	2178.5	1934.7	456.179	2.79549	4.25691
1368	2020	8	27	12	238.5	2020.65	21.9832	33.4169	243.434	7.97014	2230.85	2009.28	480.432	2.52405	3.87429	29.4816	32.6333	248.942	7.97155	2186.86	1915.35	467.998	3.18082	4.78105	25.973	32.627		7.99032	2171.71	1919.27	443.76	2.89675	4.40308
1369	2020	8	27	13	238.542	2020.65	22.0538	33.3909	243.672	7.96899	2229.24	2007.98	481.662	2.52205	3.87068	29.47	32.6454	248.26	7.97413	2187.39	1914.42	464.683	3.19565	4.80337	26.111	32.625		7.9962	2171.6	1915	436.456	2.94171	4.46956
1370	2020	8	27	14	238.583	2020.65	21.7984	33.4571	248.372	7.97185	2233.34	2011.87	478.616	2.5202	3.87	29.4489	32.6561	247.548	7.97672	2187.87	1913.52	461.391	3.20934	4.82416	26.279	32.466		7.99909	2162.38	1904.81	431.627	2.95519	4.48949
1371	2020	8	27	15	238.625	2020.65	21.8527	33.469	265.133	7.99271	2234.08	2001.72	452.317	2.62752	4.0341	29.4689	32.6633	247.696	7.97831	2188.19	1912.71	459.35	3.22144	4.84194	26.678	32.62		7.96697	2171.31	1925.65	472.88	2.84276	4.31172
1372	2020	8	27	16	238.667	2020.65	21.9086	33.4569	262.192	7.98856	2233.33	2002.76	457.335	2.6109	4.00807	29.5543	32.6666	245.39	7.92689	2188.34	1939.9	530.157	2.94351	4.42291	26.115	32.86		7.95585	2185.22	1946.86	490.045	2.75773	4.1876
1373	2020	8	27	17	238.708	2020.65	22.2556	33.4142	260.349	7.98542	2230.68	1999.55	460.8	2.62231	4.02211	29.918	32.6528	238.974	7.91748	2187.72	1941.56	543.747	2.92852	4.3952	26.544	32.755		7.94674	2179.13	1943.33	501.292	2.74058	4.1571
1374	2020	8	27	18	238.75	2020.65	22.4792	33.4144	259.636	7.99227	2230.7	1994.41	452.193	2.67691	4.1033	30.1692	32.6135	236.236	7.91007	2185.97	1942.16	554.54	2.91042	4.36477	26.673	32.715		7.93462	2176.82	1946.58	517.787	2.68716	4.07483
1375	2020	8	27	19	238.792	2020.65	22.5635	33.4464	259.788	7.99413	2232.68	1994.46	450.164	2.69767	4.13386	30.3017	32.5763	234.198	7.90666	2184.32	1941.65	559.444	2.90197	4.35057	26.701	32.724		7.92951	2177.34	1949.35	525.159	2.66517	4.04105
1376	2020	8	27	20	238.833	2020.65	22.542	33.4373	255.765	7.98899	2232.12	1996.77	456.47	2.66886	4.09005	30.3713	32.5422	231.306	7.90424	2182.8	1941.2	562.907	2.89281	4.33621	26.734	32.708		7.93139	2176.41	1947.41	522.292	2.67593	4.0571
1377	2020	8	27	21	238.875	2020.65	22.4388	33.4162	258.961	7.98984	2230.81	1996.04	455.238	2.66124	4.07973	30.4128	32.516	231.497	7.90183	2181.64	1941.23	566.464	2.8816	4.31909	26.394	32.842		7.94227	2184.18	1950.8	508.352	2.71325	4.1167
1378	2020	8	27	22	238.917	2020.65	22.4609	33.4158	252.59	7.9847	2230.78	1998.45	461.671	2.6377	4.04339	30.3908	32.5039	231.071	7.90042	2181.1	1941.71	568.616	2.87071	4.30321	26.433	32.858		7.94116	2185.11	1951.83	510.038	2.71306	4.11575
1379	2020	8	27	23	238.958	2020.65	22.4062	33.4231	252.2	7.97956	2231.23	2001.82	468.275	2.60818	3.99869	30.3616	32.4934	231.323	7.899	2180.63	1942.3	570.791	2.85927	4.28661	26.441	32.822		7.94404	2183.02	1948.62	505.686	2.72446	4.1333
1380	2020	8	28	0	239	2020.65	22.4069	33.4205	249.454	7.97541	2231.07	2003.74	473.565	2.58771	3.96732	30.3342	32.4913	231.779	7.89759	2180.54	1943.15	573.025	2.84886	4.27142	26.453	32.87		7.96092	2185.8	1942.17	483.146	2.81771	4.27413
1381	2020	8	28	1	239.042	2020.65	22.3798	33.4262	247.931	7.97027	2231.43	2006.79	480.297	2.56092	3.9265	30.3477	32.4849	232.737	7.89718	2180.25	1943.04	573.624	2.84742	4.26913	26.469	32.888		7.96881	2186.85	1938.8	472.881	2.86261	4.34183
1382	2020	8	28	2	239.083	2020.66	21.97	33.472	259.921	7.98712	2234.27	2003.8	459.257	2.61107	4.00754	30.3429	32.4819	233.468	7.89777	2180.12	1942.67	572.683	2.84975	4.27273	26.561	32.803		7.96969	2181.92	1933.67	470.95	2.86658	4.3475
1383	2020	8	28	3	239.125	2020.66	22.3734	33.4412	253.733	7.98198	2232.36	2001.77	465.367	2.6191	4.01563	30.327	32.4733	234.056	7.89835	2179.74	1942.2	571.715	2.85043	4.27408	26.546	32.839		7.96958	2184.01	1935.52	471.414	2.86864	4.35044
1384	2020	8	28	4	239.167	2020.66	22.3506	33.4223	250.036	7.97584	2231.19	2004.04	473.046	2.5849	3.96361	30.2927	32.4644	234.99	7.89994	2179.34	1941.33	569.193	2.85453	4.28082	26.635	32.742		7.97646	2178.38	1926.72	461.651	2.90269	4.4019
1385	2020	8	28	5	239.208	2020.66	22.3079	33.3832	245.421	7.96269	2228.76	2008.81	489.855	2.5136	3.85506	30.259	32.4581	235.655	7.90153	2179.06	1940.56	566.698	2.85894	4.28799	26.585	32.798		7.97134	2181.63	1932.39	468.745	2.8771	4.36318
1386	2020	8	28	6	239.25	2020.66	22.546	33.3956	250.521	7.97555	2229.53	2001.36	473.122	2.59824	3.98212	30.2166	32.4576	236.105	7.90511	2179.04	1939.01	561.154	2.87365	4.31067	26.635	32.758		7.97823	2179.31	1926.54	459.523	2.91398	4.41884
1387	2020	8	28	7	239.292	2020.66	22.6587	33.3885	250.195	7.98141	2229.09	1997.23	465.534	2.63652	4.03958	30.221	32.4582	237.169	7.9057	2179.07	1938.7	560.247	2.87727	4.31603	26.509	32.86		7.99611	2185.22	1922.75	438.099	3.00982	4.56485
1388	2020	8	28	8	239.333	2020.66	22.6349	33.3907	246.374	7.98226	2229.23	1997.09	464.474	2.63881	4.04335	30.2779	32.458	238.67	7.90529	2179.06	1938.47	560.837	2.88079	4.32048	26.561	32.854		8	2184.87	1919.96	433.288	3.03575	4.6035
1389	2020	8	28	9	239.375	2020.66	22.6154	33.3836	247.979	7.97912	2228.78	1998.45	468.413	2.62073	4.01593	30.315	32.4591	237.695	7.90387	2179.11	1938.96	563.003	2.87712	4.31443	26.609	32.82		8.01488	2182.9	1909.91	415.309	3.11924	4.72978
1390	2020	8	28	10	239.417	2020.66	22.6437	33.3979	248.048	7.98197	2229.67	1997.53	464.903	2.639	4.04347	30.3283	32.4615	236.397	7.90246	2179.21	1939.67	565.204	2.87118	4.30531	26.405	32.888		8.01076	2186.85	1916.94	420.802	3.08318	4.67731
1391	2020	8	28	11	239.458	2020.66	22.6076	33.4048	246.475	7.97583	2230.1	2001.24	472.834	2.6062	3.99357	30.3021	32.4821	237.297	7.90605	2180.13	1938.73	559.792	2.88962	4.33311
1392	2020	8	28	12	239.5	2020.66	22.5649	33.4286	251.807	7.98369	2231.58	1998.84	463.041	2.64364	4.05122	30.2958	32.5605	239.39	7.91264	2183.62	1938.04	550.185	2.93196	4.3958
1393	2020	8	28	13	239.542	2020.66	22.5503	33.424	247.265	7.97454	2231.29	2003.29	474.691	2.59681	3.97964	30.2999	32.5679	237.592	7.91222	2183.95	1938.48	550.855	2.93088	4.39403
1394	2020	8	28	14	239.583	2020.66	22.5287	33.4296	255.07	7.9854	2231.64	1998.3	460.899	2.64892	4.05971	30.4487	32.5568	235.578	7.90781	2183.45	1939.26	557.414	2.92122	4.37748
1395	2020	8	28	15	239.625	2020.66	22.558	33.3573	257.128	7.98626	2227.15	1993.95	459.147	2.64783	4.05833	30.5571	32.581	235.92	7.9054	2184.53	1940.52	561.199	2.92166	4.37625
1396	2020	8	28	16	239.667	2020.66	22.581	33.3353	253.387	7.98111	2225.79	1995.23	465.428	2.62209	4.0188	30.6009	32.5759	233.542	7.90498	2184.3	1940.23	561.769	2.92341	4.37828
1397	2020	8	28	17	239.708	2020.66	22.5489	33.3202	257.444	7.97897	2224.85	1995.77	468.022	2.60698	3.99613	30.6887	32.5932	233.224	7.90257	2185.07	1941.41	565.556	2.92107	4.37328
1398	2020	8	28	18	239.75	2020.66	22.6396	33.3403	255.914	7.98382	2226.1	1993.69	462.026	2.64139	4.04768	30.8471	32.61	231.969	7.87616	2185.82	1954.37	608.177	2.79864	4.18753
1399	2020	8	28	19	239.792	2020.66	22.8298	33.3183	257.687	7.98368	2224.73	1991.21	461.952	2.65573	4.06767	30.7299	32.5658	232.332	7.87875	2183.85	1952.39	603.665	2.79641	4.18634
1400	2020	8	28	20	239.833	2020.66	22.8366	33.2678	256.024	7.98254	2221.6	1989.15	462.925	2.64505	4.05168	30.5739	32.5274	234.7	7.88033	2182.14	1951.4	600.899	2.7857	4.17293
1401	2020	8	28	21	239.875	2020.66	22.879	33.2763	249.091	7.97339	2222.13	1993.84	474.691	2.60482	3.98951	30.5101	32.513	233.5	7.87992	2181.5	1951.58	601.529	2.77594	4.15938
1402	2020	8	28	22	239.917	2020.66	22.864	33.2936	249.088	7.97225	2223.2	1995.41	476.342	2.59976	3.98177	30.7071	32.5663	233.74	7.88751	2183.87	1948.12	589.336	2.8401	4.25207
1403	2020	8	28	23	239.958	2020.66	22.7342	33.3466	246.741	7.96511	2226.49	2002.63	486.237	2.55911	3.92049	30.827	32.6209	233.203	7.89209	2186.3	1946.74	582.199	2.88168	4.31196
1404	2020	8	29	0	240	2020.66	22.6829	33.3586	244.056	7.96996	2227.23	2001.22	479.985	2.57933	3.95195	30.805	32.6473	235.121	7.89468	2187.48	1946.48	578.253	2.89581	4.33313
1405	2020	8	29	1	240.042	2020.66	22.5702	33.397	244.38	7.97082	2229.62	2003.61	479.262	2.57752	3.95009	30.7507	32.657	235.096	7.89627	2187.91	1946.4	575.838	2.89973	4.33969
1406	2020	8	29	2	240.083	2020.66	22.457	33.4082	240.754	7.96668	2230.31	2007.06	484.819	2.54855	3.90683	30.692	32.6585	235.237	7.89885	2187.98	1945.56	571.804	2.90778	4.35259
1407	2020	8	29	3	240.125	2020.66	22.356	33.426	243.494	7.96953	2231.41	2007.31	481.261	2.55522	3.91801	30.672	32.6564	234.164	7.89844	2187.88	1945.85	572.46	2.90332	4.34625
1408	2020	8	29	4	240.167	2020.66	22.3383	33.4195	244.234	7.97439	2231.01	2004.71	474.89	2.57644	3.9508	30.6556	32.6516	233.845	7.89903	2187.67	1945.51	571.517	2.90434	4.34807
1409	2020	8	29	5	240.208	2020.66	22.3347	33.4049	241.15	7.96724	2230.11	2007.51	484.056	2.54005	3.89515	30.626	32.6451	234.209	7.90062	2187.38	1944.68	569.004	2.90921	4.35587
1410	2020	8	29	6	240.25	2020.66	22.2759	33.3905	239.65	7.9711	2229.21	2005.3	478.882	2.55182	3.91396	30.5858	32.641	234.613	7.9022	2187.2	1944.02	566.525	2.91325	4.36256
1411	2020	8	29	7	240.292	2020.66	22.2645	33.4065	247.107	7.97596	2230.21	2003.81	472.757	2.57602	3.95107	30.5242	32.6313	235.923	7.90379	2186.77	1943.33	564.041	2.91456	4.36554
1412	2020	8	29	8	240.333	2020.66	22.3032	33.4148	246.698	7.96981	2230.72	2006.99	480.793	2.55066	3.91169	30.502	32.6334	236.558	7.90338	2186.86	1943.79	564.718	2.91028	4.35944
1413	2020	8	29	9	240.375	2020.66	22.2147	33.4307	243.078	7.96967	2231.71	2008.53	481.149	2.54379	3.90198	30.5539	32.6361	237.776	7.90196	2186.98	1944.22	566.896	2.90824	4.35559
1414	2020	8	29	10	240.417	2020.66	22.1968	33.4472	247.528	7.97753	2232.73	2005.62	471.143	2.58197	3.9606	30.5807	32.6368	237.152	7.89955	2187.01	1945.29	570.665	2.8981	4.34
1415	2020	8	29	11	240.458	2020.66	22.2848	33.4862	255.452	7.98538	2235.15	2003.04	461.508	2.63273	4.03714	30.5818	32.6353	236.273	7.89814	2186.94	1945.97	572.882	2.89051	4.32864
1416	2020	8	29	12	240.5	2020.66	22.2638	33.4692	243.317	7.97324	2234.09	2008.39	476.87	2.56955	3.94063	30.5789	32.6328	235.514	7.89773	2186.83	1946.12	573.521	2.88777	4.3246
1417	2020	8	29	13	240.542	2020.66	22.1883	33.4358	257.288	7.98809	2232.02	1999.82	457.663	2.63174	4.03714	30.5907	32.6278	234.255	7.89431	2186.61	1947.62	578.898	2.87031	4.29834										31.2344	30.7508		7.854	2049.85	1847.69	615.8	2.48457	3.73257
1418	2020	8	29	14	240.583	2020.66	22.1956	33.4223	251.082	7.97495	2231.19	2005.63	474.216	2.56667	3.93735	30.6259	32.6207	233.721	7.8929	2186.29	1947.83	581.079	2.86567	4.29095										30.9922	30.731		7.82556	2048.86	1861.22	664.888	2.33131	3.50541
1419	2020	8	29	15	240.625	2020.66	22.3478	33.3743	257.672	7.98681	2228.21	1996.12	458.668	2.63317	4.03807	30.7303	32.6203	233.227	7.88949	2186.28	1948.79	586.473	2.85803	4.27798										31.3662	30.6954		7.87413	2047.09	1835.26	582.421	2.58708	3.8855
1420	2020	8	29	16	240.667	2020.66	22.6118	33.3899	257.722	7.98366	2229.18	1996.52	462.699	2.64354	4.05086	30.8566	32.6193	232.591	7.88607	2186.23	1949.56	591.893	2.85254	4.26794										31.4088	30.8222		7.86869	2053.41	1842.59	592.184	2.57751	3.86902
1421	2020	8	29	17	240.708	2020.66	22.7359	33.4122	250.917	7.97352	2230.56	2001.82	475.864	2.60733	3.9938	30.935	32.6084	230.231	7.88266	2185.75	1950.35	597.335	2.84132	4.25013										31.2302	30.8348		7.82025	2054.04	1866.3	675.431	2.33737	3.51055
1422	2020	8	29	18	240.75	2020.66	22.9469	33.3581	253.914	7.97538	2227.2	1996.54	472.895	2.62976	4.02622	31.0191	32.617	230.111	7.88425	2186.13	1949.2	594.72	2.85896	4.27519										30.9762	30.8846		7.87681	2056.52	1844.23	579.973	2.58318	3.88246
1423	2020	8	29	19	240.792	2020.66	23.2741	33.3437	252.121	7.97723	2226.31	1992.41	470.275	2.66751	4.08035	31.0529	32.6238	231.328	7.89283	2186.43	1944.75	580.83	2.90885	4.34921										30.7748	30.8974		7.91738	2057.16	1826.66	519.056	2.767	4.16139
1424	2020	8	29	20	240.833	2020.66	23.3874	33.3581	250.121	7.97309	2227.2	1994.39	475.733	2.65894	4.0658	31.0429	32.6259	231.837	7.90042	2186.53	1940.95	568.807	2.94898	4.40934										30.7526	30.8308		7.83894	2053.84	1860.9	642.375	2.38034	3.58089
1425	2020	8	29	21	240.875	2020.66	23.3818	33.369	245.48	7.96594	2227.88	1998.58	485.207	2.62423	4.0127	31.0421	32.6271	230.223	7.90001	2186.58	1941.21	569.465	2.94678	4.40604										30.6444	30.8794		7.8785	2056.26	1845.49	577.456	2.56029	3.85243
1426	2020	8	29	22	240.917	2020.66	23.3299	33.3672	246.562	7.9658	2227.77	1998.94	485.394	2.61858	4.00466	31.0519	32.6282	229.504	7.8996	2186.63	1941.39	570.113	2.94565	4.40421										30.8196	30.9236		7.84806	2058.47	1860.12	627.56	2.4368	3.66395
1427	2020	8	29	23	240.958	2020.66	23.2735	33.3606	240.585	7.96866	2227.36	1997.6	481.579	2.62677	4.0179	31.0669	32.6292	229.883	7.90018	2186.67	1941	569.181	2.95048	4.41118										30.913	30.922		7.81663	2058.39	1873.48	683.002	2.30242	3.46082
1428	2020	8	30	0	241	2020.66	23.0381	33.2791	249.095	7.97151	2222.3	1993.74	477.12	2.61037	3.99618	31.0519	32.6286	231.397	7.90377	2186.65	1939.22	563.569	2.96839	4.43819										30.8654	30.8838		7.86819	2056.48	1848.97	593.831	2.53152	3.80626
1429	2020	8	30	1	241.042	2020.66	23.1449	33.2189	237.417	7.96137	2218.57	1994.89	489.858	2.56403	3.92457	30.9948	32.6271	233.053	7.90836	2186.58	1937.19	556.499	2.98738	4.46748										30.884	30.8476		7.85075	2054.68	1855.4	622.291	2.44763	3.68031
1430	2020	8	30	2	241.083	2020.66	23.211	33.1198	241.444	7.96523	2212.42	1987.41	483.761	2.57788	3.94589	30.9089	32.6248	234.25	7.91194	2186.48	1935.88	551.062	2.99787	4.48451										30.8368	30.8706		7.84531	2055.83	1859.1	631.748	2.42056	3.63992
1431	2020	8	30	3	241.125	2020.66	23.2039	32.9897	242.724	7.96408	2204.35	1981.33	483.995	2.5575	3.91592	30.8399	32.6212	234.953	7.91453	2186.32	1934.93	547.166	3.00452	4.49557										30.8184	30.8318		7.81688	2053.89	1870.26	681.645	2.28741	3.44033
1432	2020	8	30	4	241.167	2020.66	23.1563	32.8941	225.341	7.95894	2198.42	1979.26	489.863	2.51825	3.85718	30.8025	32.5919	233.746	7.92412	2185.01	1929.12	532.647	3.05066	4.56554										30.8068	30.8154		7.79944	2053.07	1877.18	714.027	2.20935	3.32323
1433	2020	8	30	5	241.208	2020.66	23.1028	32.7962	231.147	7.94679	2192.35	1980.41	505.242	2.44597	3.74789	30.769	32.5955	233.221	7.92771	2185.17	1927.59	527.409	3.06746	4.59116										30.7798	30.8174		7.793	2053.17	1880.16	726.413	2.17997	3.2793
1434	2020	8	30	6	241.25	2020.66	23.0822	32.6886	231.835	7.95065	2185.67	1973.15	498.902	2.45075	3.75638	30.7497	32.6041	232.851	7.92829	2185.56	1927.72	526.617	3.06956	4.59451										30.7144	30.8238		7.79456	2053.49	1880.16	723.465	2.18189	3.28285
1435	2020	8	30	7	241.292	2020.66	23.0709	32.6839	239.646	7.95251	2185.38	1972.1	496.356	2.45792	3.76754	30.7349	32.6043	234.201	7.93188	2185.57	1925.91	521.394	3.08809	4.62246										30.6268	30.849		7.77313	2054.75	1890.71	766.151	2.08799	3.14225
1436	2020	8	30	8	241.333	2020.66	23.037	32.6691	230.414	7.94136	2184.46	1976.84	511.375	2.40192	3.68218	30.7828	32.6017	235.781	7.93347	2185.45	1924.59	519.026	3.10186	4.64235										30.6768	30.8404		7.79269	2054.32	1881.87	727.27	2.1724	3.26881
1437	2020	8	30	9	241.375	2020.66	23.0649	32.654	224.617	7.93822	2183.53	1977.33	515.568	2.38835	3.66121	30.8309	32.6014	235.327	7.93205	2185.44	1924.96	521.024	3.09903	4.63735										30.8032	30.851		7.81025	2054.85	1874.02	694.056	2.25889	3.39739
1438	2020	8	30	10	241.417	2020.66	23.0709	32.6359	225.545	7.93608	2182.4	1977.35	518.362	2.37722	3.64425	30.8632	32.6025	233.737	7.92664	2185.49	1927.65	528.919	3.07223	4.59674										31.1874	30.819		7.80681	2053.25	1871.81	700.082	2.27283	3.41427
1439	2020	8	30	11	241.458	2020.66	23.0622	32.5978	227.624	7.93593	2180.04	1975.49	518.156	2.37189	3.63651	30.898	32.6043	232.842	7.92323	2185.57	1929.27	533.944	3.05707	4.57348										31.212	30.8034		7.82438	2052.47	1863.31	667.67	2.35143	3.53222
1440	2020	8	30	12	241.5	2020.66	23.0552	32.647	224.361	7.94179	2183.09	1975.36	510.557	2.40311	3.68401	30.9259	32.6054	231.938	7.92081	2185.61	1930.38	537.519	3.04671	4.55753										31.3328	30.8238		7.75094	2053.49	1894.66	812.317	2.05008	3.07808
1441	2020	8	30	13	241.542	2020.66	23.05	32.6623	224.58	7.93664	2184.04	1978.6	517.85	2.38077	3.64968	30.9449	32.6027	232.518	7.9194	2185.49	1930.89	539.599	3.0406	4.54813										31.4566	30.772		7.8225	2050.91	1861.3	670.662	2.36102	3.54403
1442	2020	8	30	14	241.583	2020.66	23.0438	32.6659	230.76	7.9415	2184.27	1976.56	511.152	2.4028	3.68348	30.971	32.5805	233.02	7.91799	2184.51	1930.69	541.565	3.03328	4.53704										32.1324	30.6894		7.85406	2046.79	1839.2	614.65	2.56031	3.83528
1443	2020	8	30	15	241.625	2020.66	23.0402	32.6794	227.68	7.93936	2185.1	1978.29	514.259	2.39409	3.67004	31.0246	32.4987	233.041	7.91458	2180.87	1929.3	546.18	3.01185	4.50511										32.1988	30.6942		7.85263	2047.03	1839.62	617.063	2.55998	3.83385
1444	2020	8	30	16	241.667	2020.66	23.0288	32.708	228	7.94121	2186.88	1978.99	511.992	2.40459	3.68602	31.068	32.4366	232.334	7.90916	2178.1	1929.71	554.021	2.98049	4.45826										32.0288	30.7302		7.84619	2048.82	1845.18	628.398	2.51725	3.77163
1445	2020	8	30	17	241.708	2020.66	22.941	32.6308	235.946	7.94207	2182.09	1975.18	510.002	2.39301	3.66985	31.1593	32.4831	232.985	7.90675	2180.17	1931.86	557.936	2.98141	4.45769										31.98	30.7308		7.82375	2048.85	1855.71	667.809	2.4082	3.60884
1446	2020	8	30	18	241.75	2020.66	22.9199	32.4826	237.532	7.94793	2172.9	1964.88	500.48	2.4025	3.68593	31.2237	32.5367	232.528	7.86634	2182.56	1954.01	623.949	2.77781	4.15178										31.5876	30.8292		7.82931	2053.76	1859.75	658.962	2.40875	3.6134
1447	2020	8	30	19	241.792	2020.66	22.8789	32.2814	243.821	7.94578	2160.42	1955.71	501.301	2.36821	3.63553	31.2269	32.5458	230.503	7.86692	2182.96	1954.01	623.009	2.78202	4.15793										31.2314	30.901		7.86088	2057.34	1850.6	605.72	2.53161	3.80147
1448	2020	8	30	20	241.833	2020.66	22.8249	32.2134	232.671	7.92764	2156.2	1960.82	525.617	2.27603	3.49514	31.2557	32.5546	229.142	7.86651	2183.35	1954.31	623.754	2.78354	4.15968										31.119	30.9064		7.86444	2057.61	1849.92	599.983	2.53893	3.81385
1449	2020	8	30	21	241.875	2020.66	22.822	32.2072	238.449	7.93349	2155.81	1957.86	517.355	2.30091	3.53344	31.2811	32.5733	229.993	7.8721	2184.19	1951.95	614.382	2.81696	4.20906										31.0366	30.9008		7.844	2057.33	1859.62	634.197	2.43491	3.65869
1450	2020	8	30	22	241.917	2020.66	22.7769	32.1583	237.095	7.92935	2152.78	1957.48	522.603	2.27405	3.49306	31.2689	32.5841	231.03	7.87269	2184.67	1952.11	613.478	2.81984	4.21343										30.8926	30.9502		7.77956	2059.8	1890.68	754.377	2.14388	3.22246
1451	2020	8	30	23	241.958	2020.66	22.7828	32.1706	233.44	7.92121	2153.54	1961.74	534.268	2.24035	3.44114	31.1978	32.5164	232.362	7.87127	2181.65	1951.01	615.446	2.79903	4.18408										30.881	30.951		7.77213	2059.84	1893.89	769.425	2.11217	3.17491
1452	2020	8	31	0	242	2020.66	22.7488	32.1283	233.903	7.92206	2150.92	1959.36	532.568	2.23711	3.43685	31.0839	32.3622	232.698	7.87286	2174.79	1945.69	611.795	2.78155	4.16127										30.862	30.9066		7.75569	2057.62	1898.92	803.078	2.04017	3.06731
1453	2020	8	31	1	242.042	2020.66	22.7179	32.1122	230.386	7.92192	2149.92	1958.78	532.588	2.23241	3.43007	31.0638	32.4658	232.512	7.87045	2179.4	1950.65	616.592	2.77678	4.15329										30.9002	30.8902		7.80825	2056.8	1875.9	698.179	2.2617	3.4001
1454	2020	8	31	2	242.083	2020.66	22.4889	32.0311	242.57	7.93478	2144.89	1950.29	513.653	2.26153	3.47773	31.0375	32.5333	231.987	7.86903	2182.41	1953.9	619.478	2.77319	4.14756										30.9014	30.8576		7.77481	2055.18	1888.75	762.876	2.11699	3.18286
1455	2020	8	31	3	242.125	2020.66	22.4039	31.948	244.082	7.92963	2139.73	1948.79	519.861	2.22413	3.42176	31.033	32.5512	229.879	7.86562	2183.2	1956.27	625.422	2.75678	4.12289										30.9596	30.83		7.76138	2053.8	1892.81	790.197	2.06422	3.10319
1456	2020	8	31	4	242.167	2020.66	22.3007	31.7907	242.851	7.93149	2129.98	1940.38	515.562	2.20816	3.39955	30.975	32.3735	230.579	7.86821	2175.3	1949.21	619.798	2.74793	4.11239										30.943	30.8222		7.76094	2053.41	1892.76	791.013	2.06054	3.0979
1457	2020	8	31	5	242.208	2020.66	22.196	31.6666	241.806	7.92334	2122.28	1938.09	525.5	2.15333	3.31718	30.9489	32.4123	230.721	7.86679	2177.02	1951.45	622.491	2.74174	4.10308										30.9324	30.8202		7.7485	2053.31	1897.79	817.385	2.00983	3.02178
1458	2020	8	31	6	242.25	2020.66	22.1116	31.5205	245.216	7.9282	2113.22	1928.82	517.114	2.15268	3.31826	30.902	32.4263	232.078	7.87038	2177.65	1950.49	616.546	2.75692	4.1263										30.7906	30.8362		7.75406	2054.11	1897.03	805.633	2.02257	3.04224
1459	2020	8	31	7	242.292	2020.66	22.0227	31.3777	244.137	7.93206	2104.36	1920.19	510.252	2.14776	3.31277	30.8858	32.4486	232.173	7.87097	2178.64	1951.09	615.724	2.76044	4.13156										30.7888	30.8378		7.73363	2054.19	1905.3	850.161	1.94258	2.92193
1460	2020	8	31	8	242.333	2020.66	21.9479	31.1303	250.765	7.93491	2089.01	1906.41	503.709	2.12935	3.28731	30.8364	32.462	231.213	7.86956	2179.23	1952.62	618.24	2.74959	4.11587										30.7838	30.8438		7.73819	2054.49	1903.77	840.112	1.96031	2.94859
1461	2020	8	31	9	242.375	2020.66	21.911	31.0951	242.496	7.92977	2086.83	1906.97	510.272	2.10197	3.2457	30.8188	32.4687	231.049	7.87014	2179.53	1952.69	617.307	2.75152	4.11893										30.8744	30.8398		7.75775	2054.29	1895.2	797.901	2.04393	3.07346
1462	2020	8	31	10	242.417	2020.66	21.877	31.0275	245.363	7.93463	2082.64	1901.55	502.974	2.11259	3.26302	30.8217	32.4581	230.814	7.86873	2179.06	1953.01	619.621	2.74356	4.10709										31.0604	30.8306		7.77931	2053.83	1884.8	753.521	2.1459	3.22486
1463	2020	8	31	11	242.458	2020.66	21.8989	31.1676	248.45	7.94148	2091.33	1905.86	495.327	2.15651	3.32933	30.825	32.4235	231.953	7.86832	2177.52	1951.98	620.074	2.73855	4.09992										31.2638	30.8156		7.78888	2053.08	1878.91	734.417	2.20126	3.30594
1464	2020	8	31	12	242.5	2020.66	21.911	31.2617	249.151	7.94134	2097.16	1910.79	496.508	2.16627	3.3434	30.793	32.374	233.023	7.8679	2175.32	1950.69	620.446	2.72876	4.08623										31.3536	30.8012		7.78644	2052.36	1878.8	739.041	2.19687	3.29848
1465	2020	8	31	13	242.542	2020.66	21.9229	31.3631	250.278	7.94319	2103.45	1915.24	495.11	2.18517	3.37151	30.7669	32.3132	233.853	7.86849	2172.61	1948.47	619.039	2.7236	4.07953										31.5876	30.7914		7.802	2051.88	1870.27	708.801	2.28258	3.42454
1466	2020	8	31	14	242.583	2020.66	21.9428	31.5406	248.662	7.94405	2114.46	1924.05	495.831	2.20824	3.40528	30.7468	32.2881	236.083	7.87108	2171.5	1946.45	614.516	2.73254	4.09347										32.0928	30.703		7.81143	2047.47	1859.34	690.037	2.35929	3.53449
1467	2020	8	31	15	242.625	2020.66	21.9411	31.5973	251.995	7.94791	2117.98	1925.33	491.317	2.23032	3.43882	30.7421	32.2797	234.454	7.86967	2171.12	1946.9	616.837	2.72409	4.08097										31.7276	30.6946		7.78486	2047.05	1872.79	740.951	2.21109	3.31673
1468	2020	8	31	16	242.667	2020.66	21.9269	31.6918	254.413	7.95276	2123.84	1928.21	485.915	2.25978	3.48349	30.7182	32.2806	234.413	7.86925	2171.16	1947.31	617.557	2.71976	4.07481										32.2854	30.7094		7.78029	2047.78	1871.96	750.153	2.23838	3.35105
1469	2020	8	31	17	242.708	2020.66	21.9181	31.7245	250.482	7.95362	2125.87	1929.59	485.129	2.26614	3.49308	30.6839	32.2751	232.833	7.86884	2170.92	1947.57	618.238	2.71384	4.06648										32.0204	30.7264		7.72472	2048.63	1897.24	869.375	1.98966	2.98126
1470	2020	8	31	18	242.75	2020.67	21.909	31.7769	252.106	7.95248	2129.12	1932.91	487.154	2.26581	3.49216	30.6839	32.284	232.949	7.87043	2171.32	1947.09	615.626	2.72275	4.07972										31.9166	30.77		7.78714	2050.81	1873.78	737.255	2.2431	3.36174
1471	2020	8	31	19	242.792	2020.67	21.7491	31.6862	253.357	7.94533	2123.49	1932.39	495.608	2.21305	3.41315	30.6897	32.2917	233.103	7.87301	2171.66	1946.03	611.337	2.73724	4.10128										31.5642	30.8116		7.80057	2052.88	1871.87	711.736	2.27618	3.415
1472	2020	8	31	20	242.833	2020.67	21.6449	31.5735	248.178	7.93819	2116.5	1930.27	503.946	2.16345	3.3386	30.6869	32.2432	232.671	7.8736	2169.5	1944.07	610.021	2.73546	4.09917										30.8502	30.8928		7.753	2056.93	1899.5	808.617	2.02742	3.04838
1473	2020	8	31	21	242.875	2020.67	21.5987	31.4461	256.34	7.95005	2108.6	1918.7	486.897	2.19702	3.39199	30.6809	32.1736	233.501	7.88819	2166.4	1934.39	585.66	2.80363	4.20221										30.886	30.8868		7.76743	2056.63	1893.12	778.296	2.0879	3.13901
1474	2020	8	31	22	242.917	2020.67	21.571	31.3375	257.77	7.9509	2101.87	1912.81	484.664	2.18751	3.37857	30.681	32.2102	235.429	7.90677	2168.03	1926.16	556.66	2.90538	4.35428										30.8524	30.8972		7.76586	2057.15	1894.41	781.657	2.07977	3.12703
1475	2020	8	31	23	242.958	2020.67	21.543	31.277	253.848	7.94976	2098.11	1910.31	485.524	2.17442	3.35917	30.6928	32.2381	235.163	7.90736	2169.27	1926.73	555.919	2.91247	4.36441										30.6994	30.9678		7.71929	2060.67	1916.97	884.438	1.89163	2.845
1476	2020	9	1	0	243	2020.67	21.5459	31.2782	248.56	7.94461	2098.19	1912.58	492.261	2.15327	3.32646	30.6798	32.2456	235.043	7.87195	2169.61	1945.02	612.804	2.72655	4.0859										30.786	30.9238		7.64872	2058.48	1941.23	1061.49	1.64382	2.47191
1477	2020	9	1	1	243.042	2020.67	21.5579	31.2836	243.384	7.94347	2098.52	1913.29	493.828	2.14998	3.32122	30.6652	32.2452	234.28	7.86654	2169.59	1947.79	621.938	2.6976	4.04272										30.8244	30.893		7.75115	2056.94	1900.41	812.578	2.01811	3.03464
1478	2020	9	1	2	243.083	2020.67	21.5523	31.2884	242.048	7.94233	2098.82	1914.07	495.387	2.14527	3.31396	30.6489	32.2603	235.489	7.86612	2170.26	1948.64	622.757	2.69534	4.03939										30.7642	30.8796		7.68157	2056.27	1927.29	974.399	1.75214	2.63535
1479	2020	9	1	3	243.125	2020.67	21.546	31.2943	246.445	7.94218	2099.19	1914.48	495.638	2.14477	3.31319	30.6628	32.2737	235.884	7.86471	2170.86	1949.71	625.249	2.69076	4.03219										31.0472	30.8102		7.684	2052.81	1921.91	967.509	1.77468	2.66728
1480	2020	9	1	4	243.167	2020.67	21.553	31.289	242.074	7.94204	2098.86	1914.22	495.774	2.14419	3.31228	30.677	32.2964	235.816	7.8633	2171.87	1951.1	627.817	2.68706	4.02621										30.865	30.8466		7.66443	2054.63	1931.72	1018.18	1.69679	2.5515
1481	2020	9	1	5	243.208	2020.67	21.5469	31.2972	241.207	7.9419	2099.37	1914.75	496.049	2.14394	3.31186	30.6739	32.3064	235.485	7.86088	2172.31	1952.66	632.035	2.67552	4.00885										30.885	30.8256		7.68386	2053.58	1923.47	967.936	1.76441	2.65318
1482	2020	9	1	6	243.25	2020.67	21.5278	31.3384	244.807	7.94375	2101.92	1916.24	494.021	2.15427	3.32762	30.6729	32.3175	234.645	7.85947	2172.81	1953.75	634.554	2.66934	3.99948										30.8254	30.8296		7.69629	2053.78	1919.26	937.183	1.80521	2.71504
1483	2020	9	1	7	243.292	2020.67	21.5255	31.344	245.734	7.93761	2102.27	1919.2	502.25	2.12918	3.28883	30.7039	32.3418	235.626	7.85906	2173.89	1954.58	635.427	2.67242	4.00342										30.7844	30.8346		7.71972	2054.03	1910.66	881.662	1.88913	2.8416
1484	2020	9	1	8	243.333	2020.67	21.4998	31.3097	239.846	7.93446	2100.14	1918.89	506.1	2.11093	3.26118	30.7452	32.3709	236.039	7.85765	2175.18	1956	638.065	2.67189	4.00176										30.6946	30.8546		7.69415	2055.03	1921.84	942.668	1.79043	2.69379
1485	2020	9	1	9	243.375	2020.67	21.3049	30.8976	249.836	7.94132	2074.58	1895.45	492.531	2.08377	3.22466	30.8313	32.39	236.221	7.85323	2176.03	1958.22	645.866	2.65965	3.98206										30.7632	30.8506		7.74358	2054.83	1902.02	828.374	1.98031	2.97882
1486	2020	9	1	10	243.417	2020.67	21.2048	30.5565	254.403	7.94218	2053.42	1877.68	487.795	2.04638	3.17083	30.85	32.3993	235.894	7.85082	2176.44	1959.6	650.178	2.65019	3.96754										30.78	30.8738		7.769	2055.99	1892.55	774.884	2.08506	3.13598
1487	2020	9	1	11	243.458	2020.67	21.1059	30.2533	265.184	7.95103	2034.61	1858.6	473.291	2.04451	3.1717	30.9032	32.4063	236.544	7.84941	2176.76	1960.16	652.702	2.64879	3.96465										31.2038	30.8582		7.81043	2055.21	1871.74	693.723	2.29366	3.44494
1488	2020	9	1	12	243.5	2020.67	21.1221	30.2762	254.847	7.94489	2036.03	1862.24	481.34	2.02367	3.13901	30.8899	32.4124	234.979	7.84799	2177.03	1961.15	655.268	2.64103	3.95316										31.0112	30.8858		7.82386	2056.58	1868.19	669.466	2.33962	3.51597
1489	2020	9	1	13	243.542	2020.67	21.0912	30.2691	247.118	7.94175	2035.59	1863.34	485.294	2.00839	3.11563	30.8898	32.4085	234.411	7.84658	2176.85	1961.71	657.759	2.63364	3.94213										31.4296	30.8404		7.80029	2054.32	1874.01	712.603	2.26634	3.40149
1490	2020	9	1	14	243.583	2020.67	21.1038	30.2758	249.623	7.9436	2036.01	1862.86	482.979	2.01723	3.12918	30.8854	32.3369	232.768	7.84517	2173.67	1959.9	659.744	2.61981	3.92223										31.8676	30.8104		7.84372	2052.82	1850.62	633.451	2.49886	3.7452
1491	2020	9	1	15	243.625	2020.67	21.105	30.2754	249.476	7.94346	2035.98	1862.89	483.161	2.01672	3.12837	30.8531	32.2441	233.629	7.84575	2169.54	1956.57	658.003	2.61139	3.91103										32.1	30.7594		7.88215	2050.28	1828.93	569.765	2.70248	4.0478
1492	2020	9	1	16	243.667	2020.67	21.112	30.2735	242.416	7.94231	2035.87	1863.22	484.615	2.01256	3.12189	30.8598	32.1689	234.24	7.84834	2166.19	1952.62	652.826	2.61805	3.92171										31.8614	30.7632		7.83658	2050.47	1852.01	645.399	2.46018	3.68786
1493	2020	9	1	17	243.708	2020.67	21.111	30.2776	247.102	7.94217	2036.12	1863.5	484.843	2.01232	3.12148	30.8599	32.113	234.048	7.85093	2163.71	1949.4	647.836	2.62583	3.93396										31.5086	30.7734		7.80701	2050.98	1867.85	699.182	2.29638	3.44638
1494	2020	9	1	18	243.75	2020.67	21.1099	30.2793	247.229	7.94303	2036.22	1863.24	483.758	2.01576	3.12682	30.8803	32.0749	233.649	7.85252	2162.01	1947.15	644.752	2.63218	3.94361										31.364	30.8594		7.80143	2055.27	1874.71	710.638	2.2676	3.40394
1495	2020	9	1	19	243.792	2020.67	21.107	30.2833	250.084	7.94088	2036.47	1864.35	486.563	2.00754	3.11405	30.9087	32.0506	232.547	7.8551	2160.93	1944.84	640.037	2.64552	3.96347										30.9194	30.8796		7.74686	2056.27	1901.03	821.666	2.00716	3.01735
1496	2020	9	1	20	243.833	2020.67	21.106	30.2801	239.231	7.93874	2036.27	1865.06	489.307	1.99879	3.10052	30.9605	32.0713	233.083	7.85869	2161.85	1943.46	633.934	2.67027	3.99962										30.5742	30.9174		7.79829	2058.16	1883.31	717.322	2.19461	3.30257
1497	2020	9	1	21	243.875	2020.67	21.1079	30.2832	250.147	7.9396	2036.47	1864.86	488.23	2.00257	3.10633	31.0349	32.144	233.395	7.86428	2165.09	1942.72	624.815	2.71233	4.06078										30.2868	30.966		7.82772	2060.58	1874.36	663.514	2.30299	3.46848
1498	2020	9	1	22	243.917	2020.67	21.1064	30.2844	244.801	7.93445	2036.54	1867.03	494.955	1.98259	3.07533	31.0927	32.2356	233.987	7.86586	2169.16	1944.72	622.72	2.73452	4.09218										30.48	30.9494		7.79515	2059.76	1886.55	723.704	2.1765	3.27604
1499	2020	9	1	23	243.958	2020.67	21.1069	30.2841	245.092	7.93831	2036.52	1865.44	489.911	1.99756	3.09857	31.1151	32.3136	233.545	7.86545	2172.63	1947.48	623.96	2.74184	4.10196										30.5534	30.9606		7.78758	2060.31	1889.77	738.564	2.15146	3.23744
1500	2020	9	2	0	244	2020.67	21.1079	30.2843	243.189	7.93716	2036.54	1865.91	491.404	1.99321	3.0918	31.103	32.3555	233.057	7.86304	2174.5	1950.23	628.397	2.73219	4.08724										30.4702	30.965		7.78901	2060.53	1889.85	735.806	2.15123	3.23795
1501	2020	9	2	1	244.042	2020.67	21.1129	30.2841	249.767	7.93602	2036.52	1866.34	492.898	1.98911	3.0854	31.0228	32.3537	233.974	7.86162	2174.42	1951.45	630.871	2.71705	4.06573										30.6072	30.9346		7.73144	2059.02	1911.29	856.246	1.92858	2.90177
1502	2020	9	2	2	244.083	2020.67	21.1169	30.2806	244.936	7.93688	2036.31	1865.78	491.743	1.99238	3.09048	30.9568	32.3547	233.985	7.86321	2174.46	1951.17	628.196	2.71886	4.06935										30.5546	30.932		7.77086	2058.89	1895.54	771.716	2.08012	3.13036
1503	2020	9	2	3	244.125	2020.67	21.1179	30.2798	250.405	7.93673	2036.26	1865.79	491.923	1.99182	3.08961	30.8858	32.3442	234.8	7.8668	2173.99	1949.53	622.045	2.72933	4.08612										30.4156	30.9392		7.77529	2059.25	1894.83	762.773	2.08807	3.14371
1504	2020	9	2	4	244.167	2020.67	21.1144	30.2819	247.025	7.93759	2036.39	1865.57	490.827	1.9951	3.0947	30.8148	32.3604	236.099	7.87239	2174.71	1947.83	612.777	2.75259	4.12176										30.4842	30.9046		7.77372	2057.52	1893.63	765.563	2.08407	3.1373
1505	2020	9	2	5	244.208	2020.67	21.1068	30.2819	251.286	7.93645	2036.39	1866.08	492.316	1.99011	3.08702	30.7328	32.3673	236.565	7.87597	2175.02	1946.87	606.896	2.76371	4.13949										30.505	30.9146		7.76515	2058.02	1897.45	783.247	2.05175	3.08834
1506	2020	9	2	6	244.25	2020.67	21.1029	30.2865	243.292	7.9343	2036.67	1867.22	495.172	1.98196	3.07436	30.678	32.3662	237.022	7.88056	2174.97	1944.93	599.348	2.78196	4.16762										30.4332	30.9132		7.76758	2057.95	1896.82	778.197	2.05596	3.09544
1507	2020	9	2	7	244.292	2020.67	21.1032	30.2882	244.682	7.93316	2036.78	1867.77	496.695	1.97772	3.06777	30.6672	32.3643	237.843	7.89115	2174.89	1939.58	582.172	2.836	4.24875										30.4304	30.9066		7.76301	2057.62	1898.42	787.573	2.03685	3.06675
1508	2020	9	2	8	244.333	2020.67	21.1039	30.2897	247.603	7.93301	2036.87	1867.91	496.901	1.97736	3.06719	30.681	32.3649	238.346	7.89773	2174.91	1936.13	571.702	2.87226	4.30287										30.1732	30.9576		7.75944	2060.17	1903.5	795.562	2.00747	3.02464
1509	2020	9	2	9	244.375	2020.67	21.099	30.286	241.331	7.92987	2036.64	1869.01	501.017	1.96454	3.04739	30.7333	32.3643	237.24	7.89732	2174.89	1935.93	572.305	2.87528	4.30663										30.0298	30.9722		7.76087	2060.89	1904.36	792.695	2.00361	3.02012
1510	2020	9	2	10	244.417	2020.67	21.1032	30.2895	248.636	7.93115	2036.86	1868.65	499.358	1.97011	3.05595	30.778	32.3635	235.958	7.89491	2174.85	1936.8	576.08	2.8669	4.29343										30.2202	30.96		7.79029	2060.28	1890.6	733.213	2.13645	3.21844
1511	2020	9	2	11	244.458	2020.67	21.0779	30.5355	252.632	7.92743	2052.12	1883.39	506.986	1.97728	3.06498	30.797	32.3644	235.995	7.8925	2174.89	1937.93	579.91	2.85611	4.27699										30.3542	30.9622		7.77972	2060.39	1894.31	754.123	2.10339	3.16721
1512	2020	9	2	12	244.5	2020.67	21.0719	31.1413	250.522	7.92571	2089.69	1916.33	515.984	2.02752	3.13735	30.7399	32.3688	237.14	7.89308	2175.09	1938.2	579.05	2.85391	4.27448										30.3328	30.9624		7.78915	2060.4	1890.51	735.48	2.14076	3.2237
1513	2020	9	2	13	244.542	2020.67	21.0841	30.7809	250.838	7.929	2067.34	1895.76	507.574	2.0071	3.10888	30.6867	32.3722	236.059	7.89367	2175.24	1938.42	578.181	2.85201	4.27236										30.3928	30.9568		7.78758	2060.13	1890.57	738.502	2.13846	3.21965
1514	2020	9	2	14	244.583	2020.67	21.1009	30.4326	249.921	7.93228	2045.73	1875.82	499.415	1.98793	3.08226	30.7179	32.3717	235.083	7.89326	2175.22	1938.38	578.81	2.8529	4.27326										30.5224	30.9084		7.79601	2057.71	1884.22	721.601	2.17998	3.28123
1515	2020	9	2	15	244.625	2020.67	21.1017	30.3247	250.083	7.93056	2039.04	1870.77	500.526	1.97106	3.05711	30.7776	32.3684	234.366	7.89345	2175.07	1937.72	578.427	2.85961	4.28247										30.5066	30.904		7.76644	2057.49	1896.47	780.459	2.05619	3.09511
1516	2020	9	2	16	244.667	2020.67	21.107	30.2905	247.419	7.92584	2036.92	1870.82	506.448	1.9501	3.02488	30.8406	32.3652	234.217	7.89665	2174.93	1935.5	573.283	2.88262	4.31604										30.705	30.8602		7.75287	2055.31	1899.01	808.447	2.01334	3.029
1517	2020	9	2	17	244.708	2020.67	21.0914	30.3384	250.717	7.92712	2039.89	1872.95	505.25	1.95841	3.03745	30.8719	32.3595	234.628	7.90184	2174.67	1932.39	565.059	2.91303	4.36117										30.717	30.8534		7.7503	2054.97	1899.7	813.863	2.00352	3.01416
1518	2020	9	2	18	244.75	2020.67	21.0777	30.4168	247.473	7.9284	2044.75	1876.69	504.388	1.96977	3.05444	30.887	32.3558	233.658	7.90304	2174.51	1931.53	563.159	2.92064	4.37237										30.598	30.8732		7.75372	2055.96	1899.83	806.743	2.00978	3.02462
1519	2020	9	2	19	244.792	2020.67	20.8731	32.5108	249.248	7.94168	2174.64	1983.11	508.981	2.21007	3.40944	30.8958	32.2477	231.079	7.90223	2169.7	1928.17	563.729	2.90661	4.3525										30.3804	30.9146		7.72315	2058.02	1914.94	874.595	1.87955	2.83032
1520	2020	9	2	20	244.833	2020.67	20.7732	32.5389	251.363	7.94897	2176.39	1981.99	499.436	2.23618	3.45041	30.9182	32.2063	233.252	7.90143	2167.86	1927	564.704	2.90052	4.34353										30.1418	30.9584		7.75058	2060.2	1907.28	814.324	1.97048	2.9692
1521	2020	9	2	21	244.875	2020.67	20.6409	32.5378	252.831	7.95225	2176.32	1981.34	495.027	2.2397	3.45704	30.945	32.2892	234.237	7.90262	2171.55	1929.02	563.336	2.9178	4.36803										29.9936	30.9844		7.80001	2061.5	1888.89	714.752	2.16126	3.25802
1522	2020	9	2	22	244.917	2020.67	20.606	32.642	252.415	7.95153	2182.78	1987.37	497.052	2.24411	3.46332	30.949	32.36	233.98	7.90382	2174.7	1930.79	561.914	2.93161	4.38782										29.8478	31.0108		7.84444	2062.82	1871.61	634.859	2.34451	3.53568
1523	2020	9	2	23	244.958	2020.67	20.5986	32.5348	253.828	7.95181	2176.13	1981.67	495.566	2.23415	3.44888	30.9429	32.3911	233.551	7.90502	2176.08	1931.28	560.258	2.9405	4.40086										29.811	31.0122		7.84487	2062.89	1871.71	634.149	2.34343	3.53447
1524	2020	9	3	0	245	2020.67	20.5987	32.5238	253.777	7.95109	2175.45	1981.41	496.405	2.22997	3.44252	30.8939	32.4034	233.569	7.90621	2176.63	1931.45	558.529	2.94315	4.40541										29.728	31.013		7.8383	2062.93	1875.18	645.482	2.30724	3.48083
1525	2020	9	3	1	245.042	2020.67	20.6097	32.5327	251.332	7.94837	2176	1983.03	500.123	2.22004	3.42702	30.8389	32.4105	234.192	7.90641	2176.94	1932.01	558.322	2.93925	4.40033										29.6742	31.0206		7.86473	2063.31	1864.02	601.161	2.42262	3.65546
1526	2020	9	3	2	245.083	2020.67	20.8333	31.2166	247.487	7.92765	2094.37	1920.99	514.057	2.02482	3.13448	30.806	32.415	233.759	7.9046	2177.14	1933.36	561.172	2.92658	4.3818										29.5562	31.0232		7.87415	2063.44	1860.6	586.063	2.45612	3.70742
1527	2020	9	3	3	245.125	2020.67	20.7497	32.1381	242.913	7.93193	2151.53	1968.55	518.266	2.12349	3.27993	30.7836	32.4171	233.305	7.9018	2177.24	1935.05	565.571	2.90942	4.35641										29.619	31.0114		7.85558	2062.85	1868.13	616.134	2.37525	3.58473
1528	2020	9	3	4	245.167	2020.67	20.845	31.1451	244.005	7.92822	2089.93	1916.89	512.51	2.02114	3.12931	30.7698	32.4188	233.227	7.90099	2177.31	1935.63	566.851	2.90387	4.34829										29.7164	30.9904		7.79701	2061.8	1892.07	720.511	2.12743	3.2099
1529	2020	9	3	5	245.208	2020.67	20.724	32.3838	245.665	7.9345	2166.77	1980.58	517.405	2.15572	3.32792	30.7349	32.4179	233.743	7.90219	2177.27	1935.25	565.009	2.90664	4.35296										29.6776	30.985		7.78344	2061.53	1897.72	746.845	2.06837	3.12124
1530	2020	9	3	6	245.25	2020.67	20.6232	32.5528	249.398	7.94678	2177.25	1984.71	502.473	2.21625	3.42088	30.6939	32.4173	234.107	7.90338	2177.25	1934.92	563.179	2.90881	4.35684										29.3686	31.022		7.80387	2063.38	1892.6	707.792	2.13134	3.21916
1531	2020	9	3	7	245.292	2020.67	20.5682	32.6389	248.774	7.95006	2182.59	1988.13	498.966	2.23445	3.44878	30.7157	32.418	234.48	7.90158	2177.28	1935.71	565.977	2.90143	4.34544										29.334	31.0218		7.8153	2063.37	1887.96	686.577	2.17642	3.28763
1532	2020	9	3	8	245.333	2020.67	20.5635	32.6576	249.133	7.95034	2183.75	1989.01	498.784	2.23713	3.45281	30.766	32.4116	235.919	7.89977	2176.99	1936.04	568.718	2.89626	4.33703										29.0784	31.0346		7.79973	2064.01	1896.59	715.705	2.09281	3.16384
1533	2020	9	3	9	245.375	2020.67	20.5517	32.6579	250.392	7.94762	2183.77	1990.33	502.424	2.22451	3.43343	30.778	32.4152	236.134	7.89897	2177.15	1936.49	569.994	2.89353	4.33273										29.0754	31.0336		7.81316	2063.96	1890.93	690.608	2.14797	3.24727
1534	2020	9	3	10	245.417	2020.67	20.1459	32.8203	251.766	7.9479	2193.84	2001.47	503.635	2.20948	3.41256	30.7305	32.4218	237.011	7.90017	2177.45	1936.46	568.2	2.89574	4.33666										29.379	30.9534		7.84158	2059.96	1873.51	639.292	2.28721	3.45519
1535	2020	9	3	11	245.458	2020.67	19.9988	32.6135	262.684	7.94619	2181.02	1992.31	503.714	2.17074	3.3556	30.588	32.4271	238.197	7.90536	2177.68	1935.03	560.266	2.90959	4.35946										29.5346	30.9164		7.85901	2058.11	1863.28	609.621	2.37463	3.58583
1536	2020	9	3	12	245.5	2020.67	19.8802	32.6518	263.443	7.94647	2183.39	1994.99	503.698	2.16641	3.34963	30.3939	32.441	239.438	7.91256	2178.3	1933.25	549.489	2.92984	4.39252										29.3398	30.968		7.85544	2060.68	1868.23	616.042	2.34675	3.54543
1537	2020	9	3	13	245.542	2020.67	19.8603	32.7489	267.368	7.94675	2189.41	2000.12	504.341	2.17536	3.36288	30.3079	32.4487	239.16	7.91475	2178.64	1933.02	546.285	2.93363	4.3994										29.9488	31.0036		7.89187	2062.46	1848.94	558.135	2.57339	3.87963
1538	2020	9	3	14	245.583	2020.67	19.8321	32.7907	264.391	7.94603	2192.01	2002.84	505.74	2.17414	3.36092	30.2939	32.4513	237.868	7.91195	2178.76	1934.68	550.565	2.91736	4.37518										29.9082	30.9652		7.9333	2060.54	1827.74	497.829	2.77107	4.17871
1539	2020	9	3	15	245.625	2020.67	19.8129	32.8169	263.434	7.94431	2193.63	2005.11	508.334	2.16791	3.35125	30.308	32.4535	237.031	7.91014	2178.86	1935.58	553.319	2.90933	4.3629										30.4236	30.976		7.90773	2061.08	1836.96	533.898	2.69278	4.05356
1540	2020	9	3	16	245.667	2020.67	19.8308	32.8098	261.811	7.94359	2193.19	2004.94	509.238	2.16559	3.34757	30.323	32.4555	235.832	7.90734	2178.95	1936.99	557.62	2.89604	4.34272										30.6308	30.9366		7.85516	2059.12	1858.66	615.812	2.45431	3.69247
1541	2020	9	3	17	245.708	2020.67	19.8456	32.8118	260.062	7.94687	2193.32	2003.48	504.832	2.18077	3.3709	30.3305	32.4562	235.097	7.90453	2178.98	1938.41	561.95	2.8819	4.32141										30.5894	30.923		7.85259	2058.44	1859.56	620.009	2.43743	3.66773
1542	2020	9	3	18	245.75	2020.67	19.8138	32.8367	261.105	7.94615	2194.86	2005.33	506.053	2.17765	3.36614	30.3359	32.4564	234.855	7.90373	2178.99	1938.79	563.195	2.87819	4.31576										30.3888	30.9422		7.80901	2059.4	1880.88	697.347	2.22766	3.35413
1543	2020	9	3	19	245.792	2020.67	19.6202	32.97	263.002	7.94544	2203.13	2013.97	508.37	2.17229	3.35852	30.3528	32.4525	234.744	7.90492	2178.81	1937.91	561.302	2.88588	4.32709										30.1766	30.9732		7.81544	2060.94	1880.7	685.798	2.24081	3.37601
1544	2020	9	3	20	245.833	2020.67	19.556	33.0381	260.606	7.94172	2207.35	2019.65	514.134	2.15812	3.33666	30.3808	32.4281	234.428	7.90512	2177.73	1936.76	560.823	2.88738	4.32921										29.9702	30.9878		7.77087	2061.67	1901.29	772.204	2.0402	3.07572
1545	2020	9	3	21	245.875	2020.67	19.4863	33.0597	262.181	7.943	2208.69	2020.69	512.588	2.16017	3.34025	30.4268	32.4057	234.801	7.90332	2176.73	1936.57	563.442	2.88024	4.31809										29.7744	30.8736		7.9053	2055.98	1838.6	537.095	2.60922	3.9375
1546	2020	9	3	22	245.917	2020.67	19.4939	33.1036	265.127	7.94628	2211.42	2021.49	508.602	2.17874	3.36858	30.503	32.4173	235.666	7.90351	2177.25	1936.3	563.147	2.89011	4.33163										29.6904	30.86		7.74773	2055.3	1906.79	818.949	1.91908	2.89694
1547	2020	9	3	23	245.958	2020.67	19.4774	33.0873	267.395	7.94456	2210.41	2021.51	510.753	2.16866	3.35326	30.5295	32.4423	236.555	7.90271	2178.36	1937.37	564.533	2.89093	4.33219										29.6902	30.8792		7.79716	2056.25	1887.53	719.006	2.11656	3.19486
1548	2020	9	4	0	246	2020.67	19.3272	33.0833	269.728	7.94484	2210.16	2022.17	510.267	2.15787	3.33787	30.5415	32.4533	236.539	7.8589	2178.85	1959.72	636.615	2.66633	3.99533										29.706	30.9456		7.78559	2059.57	1895.02	742.171	2.07598	3.13281
1549	2020	9	4	1	246.042	2020.67	19.3117	33.0546	265.517	7.94512	2208.38	2020.63	509.572	2.15515	3.33401	30.5519	32.4535	234.849	7.8591	2178.86	1959.56	636.272	2.66832	3.99817										29.7638	30.9906		7.73602	2061.81	1916.54	846.245	1.89005	2.85129
1550	2020	9	4	2	246.083	2020.67	19.3424	33.0931	265.171	7.9464	2210.76	2021.89	508.261	2.16653	3.35107	30.5508	32.451	234.086	7.85929	2178.74	1959.38	635.915	2.66897	3.99918										29.7912	30.9782		7.75644	2061.19	1907.76	801.944	1.96916	2.97048
1551	2020	9	4	3	246.125	2020.67	19.526	33.0755	263.898	7.94369	2209.67	2020.95	511.836	2.16762	3.35132	30.5488	32.451	233.752	7.85949	2178.74	1959.3	635.579	2.66976	4.00039										29.6044	30.8898		7.79887	2056.78	1887.77	715.84	2.11785	3.19761
1552	2020	9	4	4	246.167	2020.67	19.5445	33.0207	260.506	7.93997	2206.27	2019.59	516.338	2.14827	3.32166	30.5599	32.4552	235.401	7.86068	2178.93	1958.78	633.537	2.67721	4.01136										29.7576	30.9046		7.7463	2057.52	1908.87	822.633	1.92192	2.90019
1553	2020	9	4	5	246.208	2020.67	19.5816	32.9816	262.768	7.94325	2203.85	2015.82	511.447	2.1612	3.34161	30.52	32.4579	237.257	7.86388	2179.05	1957.59	628.087	2.68977	4.0307										29.7598	30.899		7.70873	2057.24	1923.15	907.347	1.78293	2.69049
1554	2020	9	4	6	246.25	2020.67	19.2878	33.0899	261.42	7.94453	2210.57	2022.92	510.745	2.15414	3.33239	30.4727	32.4532	237.309	7.87307	2178.84	1953.2	612.513	2.73152	4.09398										29.7914	30.8944		7.64716	2057.01	1945.4	1063.65	1.57569	2.37753
1555	2020	9	4	7	246.292	2020.67	18.985	33.2304	266.659	7.94081	2219.28	2034.02	517.204	2.12857	3.29433	30.4348	32.4457	237.985	7.87827	2178.51	1950.62	603.844	2.75379	4.12797										29.784	30.8922		7.73759	2056.9	1911.62	841.484	1.88988	2.85171
1556	2020	9	4	8	246.333	2020.67	18.6834	33.2736	267.214	7.94309	2221.96	2037.29	514.402	2.11911	3.28185	30.4527	32.447	239.94	7.88546	2178.57	1946.91	592.05	2.79288	4.18629										29.737	30.9068		7.76002	2057.63	1903.62	793.537	1.97343	2.97811
1557	2020	9	4	9	246.375	2020.67	18.5959	33.2845	273.016	7.94337	2222.64	2038.32	514.093	2.11465	3.27558	30.4419	32.4494	240.493	7.88966	2178.67	1944.95	585.295	2.81392	4.21795										29.6786	30.9214		7.74945	2058.36	1908.78	816.044	1.92955	2.91231
1558	2020	9	4	10	246.417	2020.68	18.5052	33.2776	273.834	7.93966	2222.21	2040.19	519.061	2.09191	3.24112	30.4317	32.4512	240.706	7.89186	2178.75	1943.97	581.795	2.82457	4.23405	25.3474	31.8506		7.97301	2126.7	1896.46	459.334	2.65892	4.05726	29.7308	30.944		7.73688	2059.49	1914.4	843.706	1.88739	2.848
1559	2020	9	4	11	246.458	2020.68	18.3486	33.3574	274.436	7.93794	2227.16	2046.21	522.219	2.08042	3.22402	30.3904	32.4527	239.807	7.89205	2178.82	1944.23	581.524	2.82164	4.23023	25.4494	31.9282		7.94303	2131.2	1913.94	499.252	2.53114	3.8603	29.9018	30.9366		7.8003	2059.12	1887.33	713.669	2.15112	3.24419
1560	2020	9	4	12	246.5	2020.68	18.2506	33.3188	275.545	7.93822	2224.77	2044.67	521.349	2.0708	3.21013	30.3769	32.454	239.198	7.89225	2178.88	1944.28	581.231	2.82145	4.23012	25.5666	31.8926		7.96304	2129.13	1901.74	472.339	2.63474	4.01729	30.066	30.9496		7.81473	2059.77	1880.72	686.866	2.22663	3.35611
1561	2020	9	4	13	246.542	2020.68	18.007	33.2772	283.817	7.9365	2222.18	2044.78	523.112	2.04216	3.16789	30.4138	32.4523	237.328	7.89144	2178.8	1944.35	582.477	2.82073	4.22854	25.7246	31.8982		7.96206	2129.46	1901.34	473.599	2.64512	4.03113	30.274	30.9602		7.81816	2060.29	1878.38	680.685	2.25945	3.40312
1562	2020	9	4	14	246.583	2020.68	18.0279	33.2911	287.748	7.93878	2223.05	2044.4	520.135	2.05411	3.18617	30.4496	32.4527	237.149	7.89264	2178.82	1943.49	580.541	2.8306	4.24281	25.7076	31.951		7.96107	2132.52	1904.44	475.346	2.64455	4.0299	30.1154	30.9736		7.77959	2060.96	1896.26	754.473	2.08534	3.14241
1563	2020	9	4	15	246.625	2020.68	18.0815	33.2718	299.206	7.95106	2221.85	2037.65	503.32	2.10637	3.26694	30.5132	32.4528	237.012	7.89383	2178.83	1942.41	578.586	2.84324	4.26084	25.7434	31.9108		7.97009	2130.19	1897.84	463.372	2.68811	4.09627	30.148	30.9504		7.78402	2059.81	1893.26	745.41	2.10405	3.17049
1564	2020	9	4	16	246.667	2020.68	18.6983	33.2621	295.29	7.96134	2221.25	2028.44	489.92	2.19578	3.40055	30.5748	32.4513	236.292	7.89603	2178.76	1940.77	575.04	2.86087	4.28637	25.736	31.9496		7.9711	2132.44	1899.22	462.41	2.69686	4.10928	30.1386	30.909		7.78045	2057.74	1893.06	752.023	2.08524	3.14264
1565	2020	9	4	17	246.708	2020.68	18.8009	33.1904	289.527	7.95162	2216.8	2028.32	502.051	2.15588	3.33842	30.6389	32.4054	235.498	7.89922	2176.72	1937.07	569.653	2.87986	4.3144	25.5088	31.9356		7.97612	2131.63	1897.74	456.066	2.69901	4.11552	30.22	30.8976		7.76488	2057.17	1898.5	783.521	2.02772	3.05523
1566	2020	9	4	18	246.75	2020.68	18.9868	33.1138	287.492	7.95791	2212.05	2020.22	493.005	2.18954	3.38953	30.6591	32.3464	232.426	7.90042	2174.09	1934.28	567.387	2.88254	4.31879	25.5816	31.968		7.95613	2133.5	1908.57	482.02	2.61059	3.97948	30.1548	30.902		7.72131	2057.39	1916.35	878.487	1.85592	2.79694
1567	2020	9	4	19	246.792	2020.68	19.0177	33.0466	284.464	7.95619	2207.88	2017.23	494.584	2.17826	3.37229	30.6749	32.2788	232.62	7.90561	2171.08	1929.16	558.876	2.90529	4.35343	25.8036	31.9644		7.95115	2133.3	1909.23	488.519	2.60621	3.97017	30.0406	30.907		7.65373	2057.64	1942.38	1046.47	1.61303	2.43178
1568	2020	9	4	20	246.833	2020.68	19.1745	33.0947	281.238	7.95847	2210.86	2017.69	492.136	2.20478	3.41166	30.7	32.3289	236.346	7.91481	2173.31	1925.9	545.119	2.96242	4.43806	25.9344	31.9352		7.95216	2131.6	1906.41	486.853	2.61996	3.98986	29.9756	30.9232		7.65016	2058.45	1944.69	1056.28	1.59844	2.41018
1569	2020	9	4	21	246.875	2020.68	19.1699	33.0932	282.598	7.95575	2210.77	2018.87	495.701	2.19269	3.393	30.7066	32.4098	237.884	7.91901	2176.91	1926.4	539.287	2.99407	4.48442	25.9618	31.9402		7.94418	2131.89	1910.33	497.631	2.58413	3.93491	29.8776	30.9426		7.54159	2059.42	1983.04	1391.89	1.27358	1.92086
1570	2020	9	4	22	246.917	2020.68	19.1662	33.0116	280.508	7.95203	2205.71	2016.25	499.78	2.1689	3.35681	30.6546	32.4452	238.079	7.9202	2178.49	1927.38	537.76	2.99875	4.49181	25.8784	31.9764		7.94319	2133.99	1913.12	499.333	2.57571	3.92271	29.7652	30.953		7.60102	2059.94	1964.19	1197.69	1.43533	2.16554
1571	2020	9	4	23	246.958	2020.68	19.2446	32.8919	282.106	7.95131	2198.28	2009.73	499.512	2.16057	3.34416	30.5529	32.4592	238.634	7.9204	2179.11	1928.54	537.648	2.99063	4.48103	25.8684	32.0168		7.94221	2136.33	1915.58	501.052	2.57441	3.92043	29.7382	30.9538		7.59445	2059.98	1966.59	1217.8	1.41455	2.13437
1572	2020	9	5	0	247	2020.68	19.2974	32.8086	284.571	7.95659	2193.12	2002.63	491.692	2.17895	3.37279	30.451	32.4656	239.005	7.92259	2179.39	1928.39	534.516	2.99269	4.4856	25.7764	32.0734		7.94422	2139.62	1917.95	498.856	2.58192	3.93238	29.7028	30.9532		7.60288	2059.95	1963.85	1191.91	1.43739	2.1691
1573	2020	9	5	1	247.042	2020.68	19.2749	32.8195	279.992	7.94788	2193.79	2007.22	503.347	2.14167	3.31519	30.398	32.4656	238.708	7.92179	2179.39	1929.22	535.76	2.98278	4.47155	25.7424	32.1204		7.94424	2142.34	1920.42	499.278	2.58398	3.93544	29.7526	30.9548		7.58231	2060.03	1970.67	1255.92	1.38025	2.08252
1574	2020	9	5	2	247.083	2020.68	19.2989	32.8251	279.635	7.94716	2194.14	2007.68	504.38	2.14104	3.31398	30.341	32.4634	238.933	7.92098	2179.3	1930.01	536.996	2.97227	4.45668	25.6924	32.0938		7.94925	2140.8	1917.08	492.265	2.60092	3.9621	29.7464	30.971		7.60474	2060.83	1963.8	1186.74	1.44639	2.18225
1575	2020	9	5	3	247.125	2020.68	19.3577	32.8394	281.311	7.95144	2195.03	2006.15	498.839	2.16483	3.3502	30.2849	32.4605	239.214	7.92018	2179.17	1930.76	538.229	2.96182	4.44187	25.697	32.0886		7.95727	2140.5	1912.89	481.541	2.64003	4.02169	29.6094	30.9552		7.62916	2060.05	1955.29	1114.54	1.51195	2.28231
1576	2020	9	5	4	247.167	2020.68	19.4097	32.8294	278.984	7.94972	2194.41	2006.04	501.042	2.16068	3.3434	30.2508	32.4594	239.42	7.91837	2179.12	1931.93	540.95	2.94841	4.42229	25.7286	32.0964		7.94428	2140.95	1919.36	499.002	2.58036	3.93033	29.571	30.9254		7.68759	2058.56	1933.19	958.644	1.69835	2.56423
1577	2020	9	5	5	247.208	2020.68	19.4887	32.8741	275.999	7.95	2197.18	2007.75	501.167	2.17222	3.36026	30.2249	32.4602	239.562	7.91757	2179.15	1932.58	542.184	2.94148	4.41227	25.728	32.058		7.9393	2138.72	1919.94	505.474	2.55215	3.88775	29.7812	30.8896		7.58202	2056.77	1967.72	1255.54	1.37725	2.07822
1578	2020	9	5	6	247.25	2020.68	19.4088	32.8755	278.142	7.94528	2197.27	2010.45	507.485	2.1464	3.32097	30.1802	32.4563	239.75	7.91876	2178.98	1932.16	540.409	2.94297	4.41522	25.7612	31.9916		7.93731	2134.87	1917.49	507.582	2.53852	3.86729	29.806	30.8874		7.58945	2056.66	1965.01	1232.15	1.39983	2.11212
1579	2020	9	5	7	247.292	2020.68	19.4341	32.8922	277.032	7.94756	2198.3	2010.15	504.601	2.15947	3.34086	30.1659	32.4598	240.881	7.92096	2179.14	1931.25	537.167	2.95373	4.43154	25.7658	31.9642		7.93233	2133.28	1918.53	514.251	2.5123	3.82756	29.7944	30.8924		7.51788	2056.91	1988.77	1475.63	1.20535	1.81874
1580	2020	9	5	8	247.333	2020.68	19.4304	32.8739	276.449	7.94484	2197.17	2010.41	508.068	2.14608	3.32031	30.1819	32.4641	241.792	7.92516	2179.33	1929.07	530.968	2.97862	4.46859	25.7612	31.9734		7.93534	2133.82	1917.57	510.139	2.52719	3.85021	29.7308	30.9004		7.53831	2057.31	1982.83	1401.93	1.25544	1.89465
1581	2020	9	5	9	247.375	2020.68	19.3786	32.8443	274.156	7.93913	2195.33	2011.7	515.503	2.11562	3.27383	30.231	32.4624	241.838	7.92835	2179.25	1926.94	526.224	3.00103	4.50149	25.708	31.4964		7.93836	2106.16	1893.76	501.539	2.48592	3.79285	29.663	30.9408		7.52974	2059.33	1987.71	1433.14	1.23189	1.8593
1582	2020	9	5	10	247.417	2020.68	19.3474	32.8071	273.439	7.93641	2193.02	2011.12	518.814	2.09863	3.24806	30.2018	32.4637	240.555	7.92955	2179.31	1926.58	524.514	3.00468	4.50739	25.7506	31.4466		7.93937	2103.27	1890.61	499.684	2.48911	3.79777	29.8626	30.9418		7.55617	2059.38	1978.29	1341.69	1.31212	1.97909
1583	2020	9	5	11	247.458	2020.68	19.3393	32.7617	276.639	7.93869	2190.21	2007.77	515.185	2.10316	3.25548	30.2437	32.4637	239.44	7.92774	2179.31	1927.21	527.111	2.99914	4.49844	25.6544	31.328		7.95539	2096.4	1878.08	477.324	2.54348	3.88315	29.8478	30.9508		7.66059	2059.83	1942.77	1028.6	1.62662	2.45351
1584	2020	9	5	12	247.5	2020.68	19.3529	32.7476	273.72	7.93497	2189.33	2008.55	520.144	2.08766	3.23148	30.284	32.4604	239.047	7.92694	2179.16	1927.21	528.233	2.9986	4.49705	25.6006	31.4384		7.9654	2102.8	1878.89	465.392	2.59896	3.96725	30.006	30.9434		7.55602	2059.46	1977.79	1342.64	1.31915	1.98874
1585	2020	9	5	13	247.542	2020.68	19.3544	32.7472	275.09	7.93925	2189.31	2006.65	514.266	2.10526	3.25871	30.3118	32.459	238.289	7.92813	2179.1	1926.31	526.447	3.00792	4.51062	25.5442	31.14		7.96542	2085.5	1865.17	462.845	2.56078	3.91296	30.5004	30.9378		7.56145	2059.18	1973.57	1325.69	1.3597	2.04654
1586	2020	9	5	14	247.583	2020.68	19.373	32.6922	281.582	7.94653	2185.9	2000.43	503.838	2.13156	3.2997	30.3602	32.4581	238.539	7.92933	2179.06	1925.27	524.65	3.01947	4.52721	25.558	30.9496		7.95943	2074.46	1858.88	468.82	2.51258	3.8413	30.0194	30.962		7.51188	2060.38	1992.92	1500.58	1.20426	1.81535
1587	2020	9	5	15	247.625	2020.68	19.3901	32.6398	283.193	7.94981	2182.65	1996.11	498.915	2.14154	3.3154	30.43	32.4559	238.057	7.93052	2178.96	1924.02	522.829	3.03317	4.5467	25.5584	31.1934		7.95945	2088.59	1870.44	470.92	2.53946	3.87962	30.6556	30.9652		7.50131	2060.54	1993.83	1543.36	1.20769	1.81663
1588	2020	9	5	16	247.667	2020.68	19.4097	32.6217	280.352	7.9501	2181.52	1994.9	498.36	2.1425	3.31685	30.5253	32.4527	237.315	7.93272	2178.82	1921.99	519.532	3.05506	4.57809	25.6174	30.8802		7.95746	2070.43	1856.09	470.723	2.50097	3.82366	30.6898	30.9618		7.50374	2060.37	1992.75	1534.05	1.21533	1.82794
1589	2020	9	5	17	247.708	2020.68	19.6479	32.6743	278.022	7.95638	2184.79	1993.31	490.714	2.19238	3.39162	30.5954	32.4498	236.591	7.93291	2178.69	1921.24	519.162	3.06328	4.58934	25.872	30.0492		7.93948	2022.25	1822.91	486.628	2.35091	3.60085	30.7842	30.9236		7.52617	2058.47	1983.35	1449.54	1.27655	1.91964
1590	2020	9	5	18	247.75	2020.68	19.8165	32.7253	274.998	7.95966	2187.95	1993.39	487.002	2.22462	3.4396	30.6438	32.4403	234.298	7.93311	2178.27	1920.43	518.777	3.06853	4.59657	25.8282	29.9954		7.93949	2019.13	1820.61	486.121	2.34157	3.58765	30.843	30.8958		7.5396	2057.08	1977.44	1400.92	1.31438	1.9763
1591	2020	9	5	19	247.792	2020.68	19.8029	32.7168	273.829	7.95994	2187.42	1992.91	486.545	2.22392	3.43871	30.7155	32.4417	233.871	7.93431	2178.33	1919.27	516.985	3.08298	4.61707	25.781	30.112		7.93351	2025.89	1829.16	495.158	2.32345	3.55903	30.5332	30.885		7.55802	2056.54	1972.2	1336.14	1.34883	2.03028
1592	2020	9	5	20	247.833	2020.68	19.7599	32.7322	273.644	7.95722	2188.38	1995.23	490.239	2.21038	3.41803	30.791	32.4487	233.991	7.9365	2178.64	1917.73	513.788	3.1041	4.64741	25.7626	30.0644		7.93152	2023.13	1827.86	497.376	2.30819	3.53639	30.279	30.9452		7.64045	2059.55	1947.64	1083.84	1.5868	2.39006
1593	2020	9	5	21	247.875	2020.68	19.727	32.7522	270.722	7.9555	2189.62	1997.28	492.69	2.2024	3.40582	30.8429	32.4535	233.919	7.9397	2178.86	1915.75	509.193	3.1282	4.68261	25.6116	30.9586		7.93654	2074.98	1869.54	499.021	2.41201	3.68686	29.9626	30.9496		7.62188	2059.77	1955.92	1136.07	1.50951	2.27601
1594	2020	9	5	22	247.917	2020.68	19.8033	32.773	274.948	7.96178	2190.91	1995.03	484.72	2.23741	3.45911	30.8409	32.4563	233.978	7.93989	2178.98	1915.76	508.932	3.12939	4.68438	25.532	31.1896		7.93955	2088.37	1879.75	497.11	2.44345	3.73329	29.8264	30.955		7.57431	2060.04	1973.03	1281.79	1.36144	2.05363
1595	2020	9	5	23	247.958	2020.68	19.8498	32.7559	272.298	7.96006	2189.85	1994.59	486.793	2.232	3.45049	30.755	32.46	236.067	7.94109	2179.15	1915.92	507.346	3.12727	4.68255	25.6812	30.7442		7.92957	2062.55	1861.95	506.48	2.36383	3.61479	29.7848	30.9708		7.60874	2060.82	1962.24	1174.8	1.46053	2.2033
1596	2020	9	6	0	248	2020.68	19.8349	32.7652	271.228	7.95535	2190.43	1997.31	493.062	2.21148	3.41881	30.66	32.4603	236.329	7.94128	2179.16	1916.58	507.171	3.11818	4.67044	25.7988	29.676		7.92458	2000.61	1811.92	503.043	2.24068	3.43702	29.7366	30.9734		7.62717	2060.95	1956.19	1120.83	1.51427	2.28472
1597	2020	9	6	1	248.042	2020.68	19.799	32.7896	267.816	7.95263	2191.94	2000.05	496.897	2.19942	3.4003	30.5519	32.4619	236.879	7.93948	2179.23	1918.47	509.856	3.0966	4.6398	25.8432	29.3054		7.9186	1979.13	1796.24	507.586	2.18089	3.34911	29.687	30.983		7.5776	2061.43	1973.8	1271.39	1.36495	2.0597
1598	2020	9	6	2	248.083	2020.68	19.6722	32.7618	268.35	7.95491	2190.21	1998.41	493.553	2.19651	3.39711	30.4629	32.465	236.983	7.93667	2179.37	1920.78	513.969	3.07174	4.6039	25.7606	29.5084		7.92461	1990.9	1804.04	501.391	2.22045	3.40831	29.6528	30.979		7.58803	2061.23	1970.27	1238.09	1.39271	2.10186
1599	2020	9	6	3	248.125	2020.68	19.7769	32.8055	271.845	7.95919	2192.93	1998.08	488.418	2.22732	3.4435	30.3909	32.4662	237.209	7.87087	2179.42	1955.34	616.362	2.71359	4.06808	25.7446	29.9816		7.91963	2018.33	1829.16	512.787	2.24647	3.44295	29.661	30.9796		7.64445	2061.26	1950.73	1072.31	1.56467	2.3613
1600	2020	9	6	4	248.167	2020.68	19.6919	32.7721	266.98	7.94847	2190.85	2001.7	502.213	2.17178	3.35862	30.327	32.4684	237.431	7.87406	2179.52	1954.29	611.063	2.72391	4.08442	25.6408	30.698		7.92864	2059.87	1860.42	507.313	2.35146	3.59681	29.5642	30.952		7.65788	2059.89	1945.2	1035.36	1.60037	2.41615
1601	2020	9	6	5	248.208	2020.68	19.7309	32.8182	266.578	7.95375	2193.71	2001.51	495.682	2.20164	3.4041	30.278	32.4695	238.052	7.87526	2179.57	1954.09	609.11	2.72538	4.08729	25.5702	31.343		7.93066	2097.27	1890.94	510.703	2.42198	3.69842	29.7278	30.943		7.67531	2059.44	1937.67	990.027	1.66776	2.51662
1602	2020	9	6	6	248.25	2020.68	19.7337	32.8209	266.648	7.94803	2193.88	2004.19	503.329	2.17785	3.36727	30.2389	32.4704	238.546	7.87545	2179.61	1954.31	608.817	2.72269	4.08378	25.5156	31.4794		7.93067	2105.18	1897.84	511.994	2.43161	3.71232	29.7288	30.912		7.66274	2057.89	1940.89	1022.11	1.62377	2.45046
1603	2020	9	6	7	248.292	2020.68	19.7906	32.8832	268.204	7.95832	2197.74	2002.47	490.36	2.23223	3.45036	30.2329	32.4718	239.457	7.87565	2179.67	1954.31	608.506	2.72324	4.08467	25.514	31.4492		7.92869	2103.42	1897.32	514.465	2.41919	3.69369	29.7466	30.9094		7.70017	2057.76	1926.9	927.886	1.75241	2.64445
1604	2020	9	6	8	248.333	2020.68	19.8956	32.9447	267.403	7.9596	2201.56	2004.41	489.338	2.25216	3.47976	30.271	32.4727	240.526	7.87785	2179.71	1952.96	604.845	2.73822	4.10661	25.5358	31.487		7.9317	2105.62	1897.59	510.635	2.43891	3.72315	29.7024	30.9122		7.7106	2057.9	1923.32	903.087	1.78671	2.69659
1605	2020	9	6	9	248.375	2020.68	19.8759	32.9076	266.31	7.95588	2199.26	2004.28	493.842	2.23087	3.44732	30.3158	32.4723	240.118	7.87704	2179.69	1953.03	606.144	2.7384	4.10627	25.495	31.5344		7.92772	2108.36	1901.99	516.643	2.42198	3.69727	29.6604	30.9354		7.65403	2059.06	1945.39	1045.54	1.5926	2.40379
1606	2020	9	6	10	248.417	2020.68	19.9576	32.9329	267.994	7.95816	2200.83	2004.02	491.119	2.24972	3.47551	30.3427	32.473	238.64	7.87424	2179.72	1954.26	610.796	2.72673	4.08838	25.5162	31.3072		7.92673	2095.19	1891.39	515.824	2.39567	3.65922	29.5826	30.9626		7.61046	2060.41	1962.23	1169.07	1.45384	2.19474
1607	2020	9	6	11	248.458	2020.68	20.0188	32.9551	268.484	7.96044	2202.2	2003.73	488.369	2.26674	3.50109	30.3384	32.4743	238.584	7.87443	2179.78	1954.23	610.482	2.72743	4.08948	25.3278	29.789		7.90675	2007.17	1827.88	528.847	2.13979	3.28558	29.6122	30.9758		7.62588	2061.07	1957.33	1124.3	1.50324	2.269
1608	2020	9	6	12	248.5	2020.68	20.0981	32.9921	270.893	7.96572	2204.5	2002.7	481.891	2.30004	3.5515	30.308	32.4763	238.896	7.87563	2179.87	1953.93	608.525	2.73079	4.09491	25.4366	29.4744		7.92876	1988.93	1802.66	495.497	2.20861	3.39377	29.6692	30.9848		7.66331	2061.52	1944.16	1021.71	1.62681	2.45498
1609	2020	9	6	13	248.542	2020.68	20.1289	33.0021	266.959	7.966	2205.12	2002.88	481.633	2.30479	3.55848	30.2748	32.4777	238.973	7.87882	2179.93	1952.62	603.263	2.74406	4.11526	25.3944	28.5144		7.93878	1933.26	1752.27	473.449	2.14814	3.31263	29.7604	30.991		7.65674	2061.83	1946.35	1039.37	1.61121	2.43066
1610	2020	9	6	14	248.583	2020.68	20.1251	32.9884	268.956	7.96028	2204.27	2004.82	488.937	2.27792	3.51712	30.2641	32.4783	238.601	7.88002	2179.96	1952.12	601.304	2.74921	4.12313	25.4484	28.8426		7.94479	1952.29	1765.29	468.807	2.21163	3.40587	29.9702	31.0026		7.65917	2062.41	1944.94	1033.42	1.63294	2.46166
1611	2020	9	6	15	248.625	2020.68	20.1351	33.014	267.256	7.96257	2205.86	2005.04	486.216	2.2913	3.53749	30.2561	32.4777	237.593	7.88021	2179.93	1952.06	600.984	2.74938	4.1235	25.5356	29.0012		7.96381	1961.49	1764.22	446.63	2.31738	3.56579	30.0128	31.0058		7.6756	2062.57	1938.85	990.67	1.69119	2.54908
1612	2020	9	6	16	248.667	2020.68	20.1759	33.0685	266.287	7.96385	2209.24	2007.02	485.104	2.30571	3.55894	30.2309	32.4763	236.863	7.88241	2179.87	1951.1	597.391	2.75809	4.13693	25.7652	29.2734		7.96982	1977.27	1773.07	441.609	2.39334	3.67662	29.8002	30.9312		7.71203	2058.85	1923.07	900.097	1.79983	2.71536
1613	2020	9	6	17	248.708	2020.68	20.276	33.0889	269.39	7.97213	2210.5	2003.53	474.644	2.353	3.63083	30.1949	32.4753	237.178	7.8876	2179.83	1948.71	588.965	2.78132	4.17229	25.8506	29.1384		7.96384	1969.44	1768.73	447.703	2.3589	3.62453	29.6894	30.8968		7.69246	2057.13	1929.54	946.365	1.7208	2.59734
1614	2020	9	6	18	248.75	2020.68	20.2495	33.0161	265.456	7.96841	2205.99	2001.66	478.69	2.32677	3.59118	30.1592	32.4795	237.892	7.8938	2180.01	1945.98	579.089	2.81043	4.21642	25.569	30.8726		7.97985	2069.99	1845.48	442.699	2.6025	3.97957	29.6618	30.8992		7.66389	2057.25	1940.25	1018.79	1.62256	2.44927
1615	2020	9	6	19	248.792	2020.68	20.2536	32.9324	272.203	7.97469	2200.8	1994.34	469.858	2.34675	3.62264	30.1391	32.4792	237.094	7.896	2180	1945.01	575.619	2.81989	4.2309	25.5488	30.4722		7.94187	2046.78	1844.24	487.405	2.37928	3.6429	29.772	30.871		7.68431	2055.85	1931.01	966.216	1.69627	2.55983
1616	2020	9	6	20	248.833	2020.68	20.2643	32.9041	269.936	7.96997	2199.04	1994.98	475.581	2.32365	3.58711	30.1329	32.4798	237.369	7.90019	2180.03	1942.93	569.025	2.84136	4.2632	25.5458	30.9134		7.91688	2072.36	1876.67	525.819	2.31347	3.53741	29.5546	30.8698		7.62274	2055.79	1954.01	1131.26	1.48379	2.24079
1617	2020	9	6	21	248.875	2020.68	20.3391	32.9263	266.209	7.96725	2200.42	1996.88	479.3	2.31992	3.58049	30.12	32.4814	238.398	7.90439	2180.1	1940.93	562.509	2.86238	4.2949	25.5138	31.081		7.9129	2082.08	1886.76	533.183	2.31025	3.53108	29.4772	30.879		7.65817	2056.24	1942.33	1033.23	1.59124	2.4036
1618	2020	9	6	22	248.917	2020.68	20.3043	32.9245	266.356	7.96354	2200.31	1998.75	484.086	2.3004	3.55069	30.102	32.4851	238.527	7.90458	2180.26	1941.1	562.244	2.86197	4.2945	25.4998	31.1366		7.91391	2085.3	1889.08	532.285	2.31922	3.54435	29.3168	30.896		7.6566	2057.09	1944.42	1037.42	1.57758	2.38409
1619	2020	9	6	23	248.958	2020.68	20.3109	33.0085	266.242	7.96682	2205.52	2001.57	480.677	2.32395	3.5863	30.0811	32.4902	238.311	7.90478	2180.49	1941.33	561.99	2.8614	4.29389	25.442	31.3414		7.90593	2097.17	1902.93	545.96	2.29978	3.51318	29.166	30.8828		7.67803	2056.43	1936.89	981.372	1.63754	2.47602
1620	2020	9	7	0	249	2020.68	20.303	33.0669	263.181	7.9641	2209.14	2005.94	484.784	2.31706	3.57528	30.0517	32.4952	238.304	7.90797	2180.71	1940.08	557.117	2.87587	4.31598	25.4732	31.348		7.91094	2097.56	1900.8	538.706	2.32522	3.55165	29.1386	30.8714		7.65846	2055.87	1943.56	1031.78	1.57125	2.37607
1621	2020	9	7	1	249.042	2020.68	20.2748	33.0968	261.577	7.96438	2210.99	2007.57	484.713	2.31899	3.5783	30.0209	32.4996	238.634	7.91117	2180.91	1938.81	552.28	2.8902	4.33789	25.5044	31.0662		7.93296	2081.22	1877.06	504.921	2.39784	3.66521	29.2054	30.8188		7.61989	2053.24	1954.37	1137.81	1.45236	2.19617
1622	2020	9	7	2	249.083	2020.68	20.2369	33.1024	258.522	7.96266	2211.34	2008.92	487.004	2.30881	3.5629	30.0017	32.5015	238.752	7.91236	2180.99	1938.4	550.488	2.89483	4.34509	25.5496	30.268		7.91697	2034.94	1845.41	519.295	2.24847	3.44483	29.098	30.8414		7.64832	2054.37	1946.02	1058.35	1.53474	2.32139
1623	2020	9	7	3	249.125	2020.68	20.2422	33.1316	262.255	7.96694	2213.15	2008.42	481.729	2.33125	3.59724	29.9759	32.5052	238.924	7.91456	2181.16	1937.59	547.205	2.90431	4.35966	25.5264	31.0218		7.91399	2078.64	1883.33	531.025	2.31011	3.53134	29.0748	30.8058		7.64174	2052.59	1946.86	1075.62	1.51067	2.2854
1624	2020	9	7	4	249.167	2020.68	20.2219	33.1507	261.688	7.96722	2214.34	2009.43	481.553	2.33276	3.59961	29.958	32.5083	239.264	7.91875	2181.29	1935.65	540.93	2.92531	4.39141	25.4482	31.6036		7.918	2112.38	1910.1	531.092	2.38078	3.63419	28.9374	30.781		7.67517	2051.36	1934.63	986.645	1.60724	2.43277
1625	2020	9	7	5	249.208	2020.68	20.2022	33.1525	261.519	7.9675	2214.45	2009.53	481.204	2.33257	3.59949	29.94	32.5122	239.227	7.92295	2181.47	1933.73	534.725	2.94649	4.42342	25.3992	31.8028		7.90802	2123.93	1924.6	547.638	2.35175	3.58845	29.0354	30.8086		7.6456	2052.73	1945.83	1065.04	1.52053	2.3006
1626	2020	9	7	6	249.25	2020.68	20.143	33.1542	256.046	7.96379	2214.56	2011.76	486.04	2.31131	3.56721	29.9189	32.5153	239.551	7.92615	2181.61	1932.32	530.048	2.96195	4.44691	25.3626	31.7678		7.90403	2121.9	1924.96	553.182	2.32735	3.55195	28.9284	30.7872		7.65003	2051.67	1943.85	1052.47	1.52676	2.31097
1627	2020	9	7	7	249.292	2020.68	20.1583	33.1176	263.182	7.96807	2212.28	2007.75	480.123	2.32796	3.59307	29.873	32.5186	240.132	7.93034	2181.75	1930.58	523.977	2.98037	4.47522	25.381	31.743		7.89005	2120.46	1929.91	574.084	2.26478	3.4565	28.886	30.785		7.64946	2051.56	1944.15	1053.89	1.52237	2.30465
1628	2020	9	7	8	249.333	2020.68	20.1859	33.1202	263.822	7.96935	2212.45	2007.1	478.503	2.33623	3.60554	29.8441	32.5217	240.768	7.93754	2181.89	1927.1	513.652	3.01711	4.53079	25.2268	32.11		7.88206	2141.74	1952.34	590.569	2.25287	3.43656	28.745	30.8254		7.63189	2053.57	1952.69	1102.68	1.46297	2.21547
1629	2020	9	7	9	249.375	2020.68	20.1949	33.1201	263.727	7.96663	2212.44	2008.3	482.012	2.32481	3.58783	29.8665	32.524	241.498	7.94273	2181.99	1924.23	506.27	3.0484	4.57741	25.2202	32.1406		7.88608	2143.51	1952.08	584.593	2.27279	3.46674	28.5626	30.8262		7.64732	2053.61	1948.26	1059.77	1.4996	2.27226
1630	2020	9	7	10	249.417	2020.68	20.203	33.1337	262.209	7.96391	2213.28	2010.21	485.681	2.31472	3.57209	29.8841	32.5273	240.916	7.94193	2182.14	1924.63	507.408	3.04613	4.57368	25.277	32.0568		7.88509	2138.65	1948.07	585.213	2.26505	3.4551	28.6018	30.6464		7.66975	2044.64	1932.32	997.766	1.56067	2.36582
1631	2020	9	7	11	249.458	2020.68	20.2289	33.1435	266.252	7.97219	2213.89	2006.68	475.092	2.35493	3.63381	29.7809	32.5265	241.181	7.94612	2182.1	1923.17	501.604	3.05846	4.5938	25.4336	31.9258		7.88311	2131.06	1941.55	586.887	2.25653	3.44167	28.6098	30.5928		7.67817	2041.97	1926.95	975.566	1.58466	2.40252
1632	2020	9	7	12	249.5	2020.68	20.233	33.177	259.969	7.96447	2215.97	2012.01	485.388	2.32402	3.58582	29.724	32.5318	240.628	7.94632	2182.34	1923.7	501.415	3.05409	4.58804	25.3388	32.2758		7.88912	2151.35	1956.51	581.328	2.30903	3.51956	28.6556	30.6088		7.7066	2042.77	1917.17	906.919	1.68269	2.55066
1633	2020	9	7	13	249.542	2020.68	20.2239	33.1977	265.526	7.97475	2217.25	2008.33	472.353	2.37161	3.65917	29.717	32.5349	239.827	7.94751	2182.48	1923.22	499.77	3.06031	4.59745	25.0848	32.5788		7.87614	2168.92	1978.81	605.333	2.26004	3.4449	28.7308	30.6102		7.68903	2042.84	1923.23	949.133	1.62865	2.46813
1634	2020	9	7	14	249.583	2020.68	20.2319	33.2236	264.442	7.97204	2218.86	2010.91	476.077	2.3626	3.64499	29.7238	32.5395	239.242	7.94671	2182.68	1923.75	500.911	3.05702	4.59235	25.0698	32.4276		7.91815	2160.15	1952.28	539.162	2.43295	3.71001	28.7866	30.5916		7.68546	2041.91	1923.42	957.7	1.61907	2.45332
1635	2020	9	7	15	249.625	2020.68	20.241	33.2458	267.168	7.97532	2220.24	2010.45	472.107	2.3805	3.67235	29.7525	32.5435	239.13	7.9529	2182.86	1920.32	492.32	3.09506	4.649	24.9294	32.5126		7.92717	2165.08	1953.08	527.025	2.47141	3.76943	28.7174	30.5582		7.72989	2040.24	1906.03	853.148	1.76383	2.67354
1636	2020	9	7	16	249.667	2020.68	20.2381	33.2588	259.623	7.9726	2221.04	2012.43	475.703	2.36924	3.6549	29.7548	32.5474	239.003	7.9591	2183.03	1917.08	483.883	3.13059	4.7023	24.9606	32.637		7.92518	2172.29	1959.77	531.085	2.47757	3.77733	28.689	30.5726		7.72332	2040.96	1909.26	868.01	1.73989	2.63738
1637	2020	9	7	17	249.708	2020.68	20.219	33.2656	265.261	7.97288	2221.47	2012.79	475.407	2.36961	3.6556	29.7449	32.5484	238.734	7.9603	2183.08	1916.54	482.281	3.1364	4.71116	25.3212	32.3142		7.9202	2153.58	1944.12	535.018	2.45268	3.73834	28.8538	30.6204		7.68275	2043.35	1925.32	964.964	1.61623	2.44826
1638	2020	9	7	18	249.75	2020.68	20.1573	33.2609	267.389	7.98216	2221.17	2008.58	463.613	2.40628	3.71281	29.7414	32.5396	239.002	7.96049	2182.69	1916.17	481.975	3.13621	4.71104	25.7008	32.0156		7.90521	2136.26	1934.13	553.974	2.38599	3.63535	28.9048	30.6578		7.67818	2045.21	1928.34	977.053	1.60688	2.43342
1639	2020	9	7	19	249.792	2020.68	20.2089	33.2704	274.6	7.98944	2221.76	2005.22	454.674	2.44529	3.7724	29.738	32.4679	238.748	7.96169	2179.5	1913.14	479.997	3.13515	4.71037	25.7822	32.1856		7.88223	2146.12	1952.31	591.185	2.30638	3.51164	29.014	30.6978		7.6596	2047.21	1936.15	1025.63	1.55627	2.35564
1640	2020	9	7	20	249.833	2020.68	20.1887	33.2766	268.154	7.98272	2222.15	2008.91	463.061	2.41314	3.72296	29.7269	32.4004	239.203	7.96288	2176.49	1910.32	478.057	3.13367	4.70915	25.2776	32.4324		7.91224	2160.43	1953.84	547.861	2.42404	3.69408	28.87	30.669		7.66303	2045.77	1934.37	1015.93	1.55674	2.35767
1641	2020	9	7	21	249.875	2020.68	20.1425	33.2745	267.619	7.98201	2222.02	2009.47	463.937	2.40572	3.71197	29.7116	32.4327	240.952	7.96508	2177.93	1910.33	475.306	3.14784	4.73028	24.6184	32.8758		7.93026	2186.14	1971.21	526.223	2.49586	3.80692	28.6442	30.6042		7.62246	2042.54	1946.55	1125.11	1.41618	2.14677
1642	2020	9	7	22	249.917	2020.68	20.0473	33.314	270.309	7.98229	2224.47	2012.07	463.955	2.40303	3.70843	29.6979	32.5028	242.105	7.96627	2181.05	1912.13	474.086	3.1605	4.74866	24.9704	32.683		7.89927	2174.96	1974.09	570.041	2.36348	3.60288	28.5846	30.5826		7.65889	2041.46	1933.4	1024.81	1.5214	2.30688
1643	2020	9	7	23	249.958	2020.68	19.9401	33.2088	264.607	7.97757	2217.94	2009.59	468.864	2.36182	3.64666	29.696	32.5312	242.071	7.95947	2182.31	1916.8	483.359	3.12468	4.69453	25.2706	32.525		7.88229	2165.8	1972.18	594.865	2.29716	3.49999	28.5688	30.5872		7.58932	2041.69	1957.13	1223.09	1.31739	1.99761
1644	2020	9	8	0	250	2020.68	19.9449	33.1499	263.795	7.92585	2214.29	2030.04	537.709	2.13211	3.29236	29.6654	32.5451	242.238	7.95566	2182.93	1919.58	488.634	3.10142	4.6599	25.0866	32.6078		7.8923	2170.6	1972.87	579.997	2.33449	3.55811	28.5344	30.4678		7.65475	2035.73	1930.03	1033.69	1.49845	2.27327
1645	2020	9	8	1	250.042	2020.69	19.891	33.1475	260.847	7.97313	2214.14	2008.82	473.886	2.33161	3.60095	29.6159	32.551	242.751	7.95586	2183.19	1920.07	488.447	3.09785	4.65523	24.6766	32.8702		7.89932	2185.81	1985.14	571.981	2.35721	3.59486	28.4888	30.4566		7.61718	2035.18	1942.47	1137.15	1.38382	2.09976
1646	2020	9	8	2	250.083	2020.69	19.8529	33.1512	254.784	7.96341	2214.37	2013.78	486.437	2.28576	3.53045	29.5739	32.5522	243.202	7.95605	2183.25	1920.34	488.227	3.0946	4.65098	24.699	32.858		7.90233	2185.11	1982.99	567.233	2.37157	3.61663	28.4798	30.4714		7.62061	2035.91	1942.02	1127.55	1.39405	2.11524
1647	2020	9	8	3	250.125	2020.69	19.8126	33.1791	254.739	7.96469	2216.1	2014.93	485.042	2.2909	3.53854	29.5259	32.5521	243.245	7.95625	2183.24	1920.61	488.007	3.09058	4.64568	24.7614	32.8426		7.88435	2184.21	1990.1	595.109	2.29465	3.49881	28.435	30.4846		7.61903	2036.57	1943.34	1132.2	1.3879	2.10612
1648	2020	9	8	4	250.167	2020.69	19.7086	33.3525	255.385	7.96797	2226.86	2023.21	482.502	2.31415	3.57408	29.4692	32.5514	244.234	7.95744	2183.21	1920.39	486.431	3.09118	4.64746	24.8744	32.7148		7.90036	2176.8	1975.78	568.713	2.36343	3.60357	28.4614	30.5176		7.63446	2038.22	1939.5	1089.32	1.43626	2.17908
1649	2020	9	8	5	250.208	2020.69	19.687	33.3035	261.455	7.97726	2223.82	2016.46	470.142	2.349	3.62849	29.419	32.5518	244.425	7.95864	2183.23	1920.16	484.86	3.09258	4.65033	24.6356	32.9046		7.89438	2187.81	1989.37	579.993	2.33485	3.56091	28.501	30.5714		7.64389	2040.9	1938.48	1064.48	1.46992	2.2295
1650	2020	9	8	6	250.25	2020.69	19.7597	33.3089	260.389	7.97254	2224.15	2018.44	476.207	2.33436	3.60516	29.3929	32.5506	244.493	7.95984	2183.18	1919.68	483.262	3.09638	4.65646	24.9892	32.5888		7.89539	2169.5	1971.18	574.998	2.33837	3.56522	28.6178	30.6272		7.64732	2043.68	1939.22	1056.41	1.49042	2.25935
1651	2020	9	8	7	250.292	2020.69	19.7735	33.3322	260.108	7.97382	2225.6	2018.96	474.801	2.34358	3.6191	29.3998	32.5502	244.623	7.96003	2183.16	1919.51	482.989	3.09817	4.65905	24.962	32.6542		7.89441	2173.29	1974.99	577.229	2.33803	3.56443	28.76	30.683		7.63175	2046.47	1946.36	1100.52	1.45477	2.20391
1652	2020	9	8	8	250.333	2020.69	19.7649	33.3364	256.449	7.9721	2225.86	2020.04	477.039	2.33558	3.60679	29.4737	32.5481	245.856	7.96023	2183.06	1918.74	482.643	3.10692	4.6711	24.8084	32.7522		7.90442	2178.97	1976.15	562.931	2.37996	3.62916	28.7788	30.6642		7.61018	2045.53	1952.74	1162.23	1.39136	2.10784
1653	2020	9	8	9	250.375	2020.69	19.7739	33.3608	258.739	7.97238	2227.37	2021.12	476.92	2.34003	3.61339	29.5118	32.5472	245.742	7.96042	2183.02	1918.3	482.337	3.11199	4.67815	24.8392	32.7896		7.89844	2181.14	1980.53	572.468	2.35906	3.59663	28.8328	30.6614		7.62661	2045.39	1946.82	1114.79	1.44218	2.18448
1654	2020	9	8	10	250.417	2020.69	19.803	33.3933	261.926	7.97466	2229.39	2021.54	474.327	2.35597	3.63749	29.518	32.5474	244.869	7.95862	2183.03	1919.24	484.771	3.10253	4.66383	24.877	32.8126		7.91445	2182.47	1973.89	548.526	2.43795	3.7163	28.9264	30.661		7.64604	2045.37	1939.69	1061.08	1.5063	2.28092
1655	2020	9	8	11	250.458	2020.69	19.8673	33.4203	271.547	7.98994	2231.06	2015.21	455.446	2.43403	3.75717	29.2909	32.518	249.443	7.96181	2181.73	1918.33	480.527	3.09325	4.65372	25.0046	32.7582		7.92247	2179.32	1966.57	536.202	2.48103	3.78102	28.7414	30.599		7.64247	2042.28	1939.07	1069.35	1.48091	2.24424
1656	2020	9	8	12	250.5	2020.69	19.8799	33.4157	267.996	7.98623	2230.78	2016.67	459.999	2.41744	3.73148	29.0058	32.5062	253.231	7.97001	2181.2	1915.78	469.848	3.10766	4.67993	25.111	32.778		7.91148	2180.47	1972	552.556	2.44093	3.71854	28.9214	30.61		7.66789	2042.83	1929.82	1002.47	1.57149	2.38004
1657	2020	9	8	13	250.542	2020.69	19.912	33.4346	272.145	7.99351	2231.95	2013.91	451.213	2.45591	3.79039	28.9108	32.5266	252.984	7.9752	2182.11	1914.4	463.256	3.12888	4.71311	25.1712	32.8312		7.9385	2183.55	1961.13	514.015	2.5801	3.92936	29.0304	30.5782		7.64332	2041.24	1936.49	1067.22	1.49876	2.26933
1658	2020	9	8	14	250.583	2020.69	19.944	33.4274	274.671	7.98979	2231.5	2015.1	455.707	2.44059	3.76649	28.9837	32.5421	252.971	7.9764	2182.8	1913.68	461.713	3.14508	4.73619	25.0172	32.9056		7.93651	2187.87	1966.76	517.554	2.56437	3.90652	29.1202	30.6322		7.65675	2043.93	1933.76	1032.25	1.5493	2.34477
1659	2020	9	8	15	250.625	2020.69	19.9802	33.4161	277.369	8.00007	2230.8	2009.27	443.098	2.49065	3.84348	29.1108	32.5507	252.318	7.97559	2183.18	1913.38	462.674	3.1551	4.7492	25.2096	32.8578		7.98753	2185.1	1937.38	449.522	2.83352	4.31453	29.255	30.6552		7.66018	2045.08	1932.91	1023.82	1.56973	2.37448
1660	2020	9	8	16	250.667	2020.69	20.009	33.3986	276.756	7.99735	2229.72	2009.48	446.214	2.47849	3.82458	29.2666	32.5546	251.22	7.96979	2183.35	1915.42	470.129	3.13936	4.72303	25.4204	32.7716		7.98154	2180.1	1934.83	456.19	2.81309	4.28159	29.4436	30.6722		7.66061	2045.93	1932.58	1023.29	1.58357	2.39382
1661	2020	9	8	17	250.708	2020.69	20.0229	33.3862	273.565	7.99363	2228.95	2010.54	450.616	2.46096	3.79749	29.3439	32.5593	250.431	7.95999	2183.56	1920.29	483.152	3.0929	4.65189	25.4346	32.763		7.97856	2179.6	1935.86	459.885	2.79803	4.25858	29.3018	30.6554		7.65404	2045.09	1934.86	1040.16	1.55296	2.34876
1662	2020	9	8	18	250.75	2020.69	20.0601	33.3738	272.97	7.99491	2228.18	2009.01	448.941	2.46886	3.80941	29.3991	32.5634	249.441	7.96818	2183.75	1915.53	472.166	3.14542	4.72997	25.1478	32.8668		7.94157	2185.62	1961.48	510.068	2.5967	3.95459	29.1542	30.6696		7.62847	2045.8	1945.06	1110.37	1.46622	2.21853
1663	2020	9	8	19	250.792	2020.69	20.1568	33.2452	278.786	8.00119	2220.2	1998.61	440.203	2.49317	3.847	29.4397	32.5621	248.68	7.91638	2183.69	1942.67	545.246	2.86547	4.30842	25.1758	32.8596		7.97259	2185.2	1945.41	468.464	2.75337	4.1929	29.1878	30.6492		7.6399	2044.78	1940.07	1078.17	1.50171	2.27212
1664	2020	9	8	20	250.833	2020.69	20.4226	33.0243	276.991	7.99948	2206.5	1986.11	440.259	2.48459	3.83295	29.4719	32.5628	248.166	7.91957	2183.72	1940.8	540.44	2.88574	4.33842	25.158	32.808		7.9616	2182.21	1948.67	482.368	2.69041	4.09775	29.2324	30.646		7.60532	2044.62	1951.51	1177.41	1.40073	2.11906
1665	2020	9	8	21	250.875	2020.69	20.5029	33.0752	272.589	7.98776	2209.65	1993.81	454.931	2.44217	3.7663	29.4651	32.5603	248.132	7.92177	2183.61	1939.62	537.164	2.89651	4.35475	25.275	32.8056		7.92662	2182.07	1964.94	530.609	2.52951	3.85135	29.1106	30.6448		7.60375	2044.56	1952.53	1181.79	1.38956	2.103
1666	2020	9	8	22	250.917	2020.69	20.6125	33.1197	273.847	7.99204	2212.41	1993.25	450.096	2.47629	3.81744	29.425	32.5604	248.361	7.92296	2183.61	1939.31	535.426	2.89885	4.35885	24.729	33.0644		7.91363	2197.07	1987.44	552.345	2.44649	3.72878	29.0582	30.6482		7.55618	2044.73	1968.52	1332.5	1.25623	1.90151
1667	2020	9	8	23	250.958	2020.69	20.585	33.0648	273.011	7.99132	2209.01	1990.96	450.468	2.46472	3.80035	29.3808	32.5622	248.24	7.92416	2183.69	1939.09	533.706	2.90095	4.36261	24.818	32.9996		7.90965	2193.32	1985.59	557.633	2.42922	3.70202	28.8686	30.6562		7.55361	2045.13	1970.5	1340.68	1.2407	1.87911
1668	2020	9	9	0	251	2020.69	20.6678	33.0276	270.955	7.9876	2206.7	1990.23	454.679	2.45057	3.77802	29.3072	32.5591	248.382	7.92435	2183.55	1939.44	533.458	2.89426	4.35365	24.858	33.003		7.90666	2193.51	1986.88	562.172	2.41919	3.68627	28.7798	30.6488		7.60304	2044.76	1954.43	1183.16	1.37011	2.07575
1669	2020	9	9	1	251.042	2020.69	20.8695	33.0053	265.913	7.98088	2205.32	1990.85	462.806	2.43433	3.75116	29.2352	32.56	248.267	7.92455	2183.59	1939.92	533.233	2.88813	4.34545	25.042	32.9126		7.90468	2188.27	1982.18	564.219	2.41688	3.6815	28.736	30.6394		7.53947	2044.29	1974.8	1388.2	1.19737	1.81435
1670	2020	9	9	2	251.083	2020.69	21.1381	33.0902	266.609	7.97916	2210.59	1994.14	465.769	2.45833	3.78472	29.1708	32.5514	248.44	7.92574	2183.21	1939.5	531.474	2.88718	4.34503	25.1004	32.8866		7.87869	2186.77	1992.56	604.717	2.30167	3.50561	28.7168	30.6454		7.5599	2044.59	1968.64	1318.93	1.24915	1.89289
1671	2020	9	9	3	251.125	2020.69	21.0053	33.0674	263.261	7.98145	2209.17	1992.82	462.689	2.45512	3.78132	29.12	32.5543	248.997	7.92694	2183.34	1939.36	529.779	2.88871	4.34804	25.0946	32.8876		7.88871	2186.82	1988.05	588.708	2.34607	3.57329	28.7166	30.6752		7.57033	2046.08	1966.62	1285.43	1.27827	1.93684
1672	2020	9	9	4	251.167	2020.69	20.8233	33.0967	265.674	7.97573	2210.99	1998.38	470.179	2.41614	3.72283	29.0741	32.5467	249.071	7.92714	2183	1939.35	529.484	2.88439	4.34228	25.2078	32.7572		7.89972	2179.26	1975.85	570.131	2.39293	3.64455	28.7558	30.7168		7.56175	2048.15	1971.1	1314.49	1.25969	1.90821
1673	2020	9	9	5	251.208	2020.69	20.78	33.1046	263.49	7.97801	2211.48	1998.01	467.366	2.42379	3.73499	29.0349	32.5465	248.458	7.92733	2182.99	1939.54	529.227	2.88147	4.33845	25.21	32.7548		7.91974	2179.12	1966.27	540.107	2.48586	3.78609	28.6982	30.6626		7.56518	2045.45	1967.8	1301.83	1.26303	1.91395
1674	2020	9	9	6	251.25	2020.69	20.7418	33.1274	262.259	7.98229	2212.89	1997.41	462.204	2.44273	3.76436	28.9928	32.5425	249.203	7.92853	2182.82	1939.11	527.491	2.88321	4.34171	25.1414	32.8574		7.89475	2185.07	1983.47	578.896	2.37445	3.61627	28.785	30.629		7.60061	2043.77	1954.33	1190.08	1.36238	2.06413
1675	2020	9	9	7	251.292	2020.69	20.7628	33.1209	264.966	7.98757	2212.49	1994.39	455.584	2.46848	3.80388	28.9988	32.5382	249.144	7.92672	2182.62	1939.85	530.096	2.87381	4.32752	24.8484	33.0212		7.90577	2194.57	1988.25	563.722	2.41603	3.68141	28.818	30.611		7.57204	2042.88	1962.74	1278.82	1.28445	1.94597
1676	2020	9	9	8	251.333	2020.69	20.7488	33.1089	267.236	7.98285	2211.75	1996.14	461.327	2.444	3.76641	29.0555	32.5349	250.601	7.92792	2182.48	1938.68	528.286	2.88553	4.34439	25.128	32.8648		7.91378	2185.5	1974.97	550.018	2.46187	3.74948	28.7928	30.5226		7.56847	2038.47	1960.03	1288.38	1.26893	1.92314
1677	2020	9	9	9	251.375	2020.69	20.7456	33.1134	268.709	7.98413	2212.02	1995.78	459.773	2.45016	3.77589	29.082	32.5262	251.711	7.92911	2182.09	1937.56	526.473	2.89372	4.35644	25.5168	32.5962		7.9108	2169.93	1960.75	551.649	2.45463	3.7365	28.8128	30.525		7.5659	2038.59	1960.88	1296.86	1.26324	1.91438
1678	2020	9	9	10	251.417	2020.69	20.7368	33.1218	263.588	7.97922	2212.55	1998.63	465.999	2.42751	3.74101	29.0997	32.5254	250.743	7.93031	2182.06	1936.78	524.718	2.90181	4.36837	25.5024	32.5904		7.93081	2169.59	1951.01	522.455	2.54754	3.87815	28.8192	30.538		7.56733	2039.24	1960.97	1292.51	1.26803	1.92152
1679	2020	9	9	11	251.458	2020.69	20.7378	33.1684	264.046	7.97631	2215.44	2002.43	470.126	2.41901	3.72752	29.0727	32.5169	251.123	7.9315	2181.68	1936.07	522.958	2.90464	4.37311	25.5568	32.6256		7.94283	2171.63	1946.43	505.939	2.61453	3.97914	28.8064	30.6122		7.54576	2042.94	1971.28	1366.13	1.21523	1.84115
1680	2020	9	9	12	251.5	2020.69	20.7589	33.2119	268.206	7.9864	2218.13	1999.68	457.881	2.47228	3.80902	29.0758	32.5173	250.519	7.9337	2181.69	1934.92	519.792	2.91675	4.39129	25.8216	32.416		7.96084	2159.48	1925.64	479.641	2.70573	4.11676	28.776	30.6208		7.54018	2043.37	1973.56	1385.42	1.2001	1.81837
1681	2020	9	9	13	251.542	2020.69	20.8197	33.2338	272.523	7.99449	2219.49	1996.44	448.143	2.51812	3.87884	29.115	32.5076	251.126	7.93689	2181.26	1932.62	515.127	2.93696	4.42126	26.0478	32.256		7.96486	2150.2	1914.43	472.891	2.72948	4.15173	28.7142	30.659		7.56161	2045.27	1968.71	1313.54	1.25423	1.90053
1682	2020	9	9	14	251.583	2020.69	20.9023	33.2067	272.061	7.99158	2217.81	1995.86	451.443	2.50863	3.86361	29.1697	32.5043	249.551	7.93909	2181.12	1930.93	511.938	2.95408	4.44627	25.9406	32.3928		7.96987	2158.13	1919.12	467.618	2.7602	4.19837	28.7016	30.6814		7.57004	2046.39	1967.06	1286.43	1.2771	1.93512
1683	2020	9	9	15	251.625	2020.69	21.1612	32.9591	279.272	7.99967	2202.45	1977.26	439.38	2.54322	3.91632	29.2525	32.4962	249.603	7.94099	2180.76	1929.01	509.129	2.9721	4.47226	25.9622	32.0388		8.04689	2137.61	1862.12	374.894	3.13149	4.76714	28.7284	30.6752		7.55747	2046.08	1970.72	1327.7	1.24494	1.88628
1684	2020	9	9	16	251.667	2020.69	21.422	32.8475	277.621	7.99976	2195.53	1969.58	438.241	2.55457	3.93204	29.3009	32.4913	248.257	7.94189	2180.54	1928	507.787	2.98151	4.48577	26.7194	31.5172		8.0489	2107.37	1831.23	368.771	3.15547	4.79932	28.7468	30.6746		7.5419	2046.05	1975.58	1380.64	1.20579	1.82685
1685	2020	9	9	17	251.708	2020.69	21.408	32.8648	271.398	7.99284	2196.6	1973.94	446.721	2.52218	3.88218	29.344	32.4938	247.397	7.94479	2180.65	1926.21	503.687	3.00208	4.51604	26.64	31.4984		8.04792	2106.28	1831.56	369.746	3.13905	4.77578	28.6928	30.6818		7.53233	2046.41	1979.16	1414.08	1.17964	1.7875
1686	2020	9	9	18	251.75	2020.69	21.4077	32.867	273.414	7.99593	2196.74	1972.55	443.003	2.53712	3.90516	29.3348	32.4873	246.125	7.9507	2180.36	1922.92	495.457	3.03292	4.56265	26.6888	31.5172		8.04493	2107.37	1833.63	372.959	3.13003	4.76108	28.5198	30.7038		7.52776	2047.51	1982.3	1430.19	1.16153	1.7609
1687	2020	9	9	19	251.792	2020.69	21.3397	32.8718	273.912	7.99502	2197.04	1973.74	444.155	2.52729	3.89069	29.3429	32.4385	244.899	7.9546	2178.19	1919.12	489.831	3.05039	4.58938	26.5786	31.7618		8.00595	2121.55	1866.38	417.978	2.93695	4.46587	28.4902	30.7104		7.53519	2047.83	1980.39	1403.93	1.1788	1.78722
1688	2020	9	9	20	251.833	2020.69	21.3739	32.9974	270.7	7.99411	2204.83	1980.39	446.391	2.53964	3.90825	29.334	32.3204	244.908	7.9585	2172.93	1913.13	483.916	3.05899	4.60388	26.949	31.385		8.01996	2099.7	1838.85	398.97	3.00312	4.56608	28.498	30.6846		7.48961	2046.55	1993.33	1572.08	1.06972	1.62193
1689	2020	9	9	21	251.875	2020.69	21.3542	33.0245	270.847	7.9932	2206.51	1982.38	447.748	2.53649	3.90336	29.264	32.0649	244.927	7.9644	2161.57	1901.92	474.76	3.05799	4.60655	26.3842	31.906		7.99798	2129.91	1878.68	428.595	2.89266	4.39945	28.4792	30.6726		7.50204	2045.95	1989.04	1523.87	1.09691	1.66333
1690	2020	9	9	22	251.917	2020.69	21.3469	33.0209	271.267	7.99729	2206.29	1980.24	442.762	2.55506	3.93205	29.2609	32.1867	248.32	7.9703	2166.99	1902.87	467.607	3.10323	4.67323	26.0444	32.1122		8.00699	2141.87	1886.15	419.737	2.93129	4.4604	28.4328	30.6812		7.48147	2046.38	1995.92	1603.75	1.04852	1.59014
1691	2020	9	9	23	251.958	2020.69	21.2572	33.1026	273.256	7.99638	2211.35	1985.54	444.612	2.55162	3.92699	29.229	32.2537	251.491	7.9762	2169.97	1902.17	460.301	3.14008	4.72837	25.5274	32.5914		7.98801	2169.65	1922.26	446.6	2.83648	4.31767	28.4246	30.6798		7.5019	2046.31	1989.62	1524.35	1.09456	1.66001
1692	2020	9	10	0	252	2020.69	21.1869	33.1215	271.605	7.99847	2212.53	1986	442.27	2.55748	3.93659	29.1819	32.2241	248.391	7.9771	2168.65	1901.07	459.04	3.13699	4.72483	25.4086	32.7638		7.97002	2179.65	1940.46	470.848	2.75181	4.18855	28.349	30.6962		7.46733	2047.13	2001.23	1660.9	1.01471	1.5392
1693	2020	9	10	1	252.042	2020.69	21.188	33.1364	266.246	7.99456	2213.45	1988.69	447.137	2.54041	3.91018	29.106	32.2229	248.44	7.977	2168.6	1901.7	459.234	3.12816	4.71272	25.502	32.6518		7.97504	2173.15	1931.94	463.403	2.77383	4.22202	28.3182	30.7096		7.49876	2047.79	1992.38	1536.61	1.08412	1.64458
1694	2020	9	10	2	252.083	2020.69	21.1843	33.1412	266.114	7.99464	2213.75	1988.92	447.073	2.54103	3.91113	29.019	32.2653	249.136	7.97591	2170.48	1904.41	460.943	3.11712	4.6969	25.9726	32.341		7.95805	2155.13	1922.39	482.599	2.69759	4.10328	28.2918	30.7048		7.46919	2047.56	2001.29	1653.24	1.0168	1.54261
1695	2020	9	10	3	252.125	2020.69	21.076	33.1373	264.258	7.99273	2213.51	1990.45	449.377	2.52192	3.88287	28.9622	32.2981	248.638	7.97581	2171.94	1906.02	461.287	3.11393	4.69256	25.3008	32.861		7.94807	2185.28	1956.88	500.999	2.64203	4.02184	28.2714	30.6912		7.50862	2046.88	1988.68	1498.72	1.1041	1.67524
1696	2020	9	10	4	252.167	2020.69	21.1299	33.1121	266.439	7.99382	2211.94	1988.22	447.815	2.52914	3.89364	28.914	32.3013	248.508	7.96871	2172.08	1910.34	470.599	3.06947	4.62625	25.4308	32.7112		7.95108	2176.6	1947.33	495.477	2.65284	4.03815	28.2958	30.7164		7.48604	2048.13	1996.68	1585.97	1.05463	1.59992
1697	2020	9	10	5	252.208	2020.69	21.1441	33.1249	261.84	7.99291	2212.74	1989.22	449.04	2.52743	3.89075	28.8559	32.2678	249.188	7.96961	2170.59	1909.19	469.298	3.06489	4.62063	25.284	32.8318		7.9201	2183.59	1969.27	540.337	2.50196	3.80906	28.2754	30.692		7.50647	2046.92	1989.36	1506.77	1.09931	1.66795
1698	2020	9	10	6	252.25	2020.69	21.1555	33.1137	261.854	7.99	2212.04	1989.98	452.501	2.51337	3.86908	28.8428	32.2692	248.281	7.97051	2170.66	1908.85	468.137	3.06866	4.62649	25.3442	32.8084		7.92511	2182.23	1965.31	532.792	2.52878	3.84941	28.2186	30.6516		7.5159	2044.9	1984.83	1470.56	1.11705	1.69538
1699	2020	9	10	7	252.292	2020.69	21.1731	33.1063	262.675	7.99209	2211.58	1988.45	449.871	2.52406	3.88541	28.8586	32.3051	248.516	7.96941	2172.25	1910.52	469.744	3.06793	4.62472	25.5526	32.6946		7.94413	2175.63	1949.1	504.786	2.62793	3.99892	28.3116	30.622		7.53333	2043.43	1977.68	1407.65	1.16168	1.76276
1700	2020	9	10	8	252.333	2020.69	21.2612	33.1298	261.495	7.98918	2213.04	1990.44	453.651	2.52048	3.87879	28.9029	32.3376	249.642	7.96731	2173.7	1912.39	472.632	3.06429	4.61817	25.3432	32.8362		7.94114	2183.84	1958.82	510.314	2.60919	3.97156	28.35	30.601		7.51176	2042.38	1983.27	1485.09	1.11065	1.68523
1701	2020	9	10	9	252.375	2020.69	21.2426	33.1203	262.037	7.98827	2212.45	1990.53	454.688	2.51349	3.86831	28.9388	32.3621	249.685	7.96521	2174.79	1914.06	475.503	3.05894	4.60927	25.1698	32.9312		7.94116	2189.35	1964.59	511.243	2.60349	3.96407	28.3206	30.5342		7.50719	2039.05	1981.74	1500.23	1.09557	1.66286
1702	2020	9	10	10	252.417	2020.69	21.249	33.1291	261.671	7.98936	2213	1990.41	453.427	2.52018	3.87846	28.9407	32.364	249.83	7.96712	2174.87	1913.09	472.994	3.0699	4.62573	25.5046	32.7614		7.95317	2179.51	1948.12	493.071	2.67557	4.07134	28.3418	30.5518		7.50662	2039.92	1982.64	1502.91	1.09598	1.66328
1703	2020	9	10	11	252.458	2020.69	21.307	33.1445	268.357	7.99845	2213.95	1986.31	442.485	2.5706	3.95532	29.0001	32.3655	250.019	7.97002	2174.94	1911.1	469.127	3.09252	4.65891	25.5432	32.7478		7.95219	2178.72	1947.69	494.264	2.67277	4.06675	28.4506	30.5704		7.51105	2040.85	1981.69	1487.38	1.11193	1.68679
1704	2020	9	10	12	252.5	2020.69	21.3289	33.1307	268.69	7.99553	2213.1	1986.87	445.878	2.557	3.93428	29.0585	32.3669	249.855	7.97292	2175	1909.11	465.286	3.11516	4.69209	25.7302	32.5926		7.9562	2169.72	1936.97	487.394	2.69337	4.09731	28.4104	30.6304		7.49647	2043.84	1989.08	1543.68	1.07918	1.63701
1705	2020	9	10	13	252.542	2020.69	21.368	33.1506	264.93	7.99462	2214.33	1988.06	447.16	2.55827	3.93564	29.0659	32.3719	249.734	7.97782	2175.23	1906.55	458.956	3.14413	4.73555	25.3362	32.8466		7.93522	2184.45	1962.28	518.722	2.58074	3.92825	28.5846	30.6444		7.5079	2044.54	1985.52	1501.54	1.11388	1.68864
1706	2020	9	10	14	252.583	2020.69	21.3405	33.156	264.626	7.99271	2214.67	1989.48	449.545	2.54722	3.91888	29.0559	32.3512	249.984	7.98572	2174.3	1901.62	448.796	3.1858	4.79873	25.7096	32.586		7.97723	2169.34	1926.16	459.948	2.79769	4.25634	28.689	30.6654		7.48933	2045.59	1991.79	1573.56	1.07628	1.63098
1707	2020	9	10	15	252.625	2020.69	21.3557	33.1975	262.167	7.9908	2217.24	1992.44	452.266	2.5439	3.91325	29.026	32.3049	249.928	7.99162	2172.25	1897.08	441.218	3.21142	4.83837	25.9124	32.3212		7.98925	2153.98	1906.08	442.688	2.84932	4.33508	28.6378	30.6662		7.48876	2045.63	1992.2	1575.57	1.07285	1.62604
1708	2020	9	10	16	252.667	2020.69	21.3514	33.1862	264.557	7.99089	2216.54	1991.85	452.054	2.54272	3.91158	28.9777	32.1963	249.297	7.99652	2167.41	1891.17	434.716	3.22264	4.85743	25.807	32.2744		7.99626	2151.27	1901.09	433.861	2.87019	4.36876	28.8002	30.6342		7.50019	2044.03	1986.58	1531.33	1.10471	1.67362
1709	2020	9	10	17	252.708	2020.69	21.2547	33.2057	266.354	7.99598	2217.75	1991.05	446.027	2.56071	3.94012	28.9577	32.1096	248.906	7.99943	2163.56	1886.86	430.802	3.22777	4.86661	25.4832	32.4712		7.99528	2162.68	1913.24	436.782	2.85618	4.34954	28.8164	30.6766		7.50562	2046.15	1986.77	1511.94	1.12019	1.69676
1710	2020	9	10	18	252.75	2020.69	21.3643	33.2233	273.724	8.00407	2218.84	1987.12	436.437	2.6118	4.0174	28.9198	32.0466	248.906	8.00133	2160.75	1884.04	428.252	3.22773	4.86797	25.7666	32.3596		7.99129	2156.21	1907.93	440.578	2.85016	4.33787	28.578	30.701		7.50805	2047.37	1988.09	1502.43	1.1166	1.6925
1711	2020	9	10	19	252.792	2020.69	21.449	33.1678	272.004	8.00116	2215.4	1985.1	439.408	2.5991	3.99742	28.9045	32.0335	247.758	8.00023	2160.17	1884.33	429.538	3.21831	4.85418	25.8438	32.2728		7.99631	2151.18	1900.71	433.771	2.87388	4.3739	28.5736	30.7002		7.46248	2047.33	2002.04	1682.26	1.01339	1.53608
1712	2020	9	10	20	252.833	2020.69	21.4065	33.1692	269.508	7.99625	2215.49	1987.92	445.351	2.57157	3.95553	28.9065	32.0871	247.723	7.99613	2162.56	1888.35	434.771	3.20081	4.82706	25.6866	32.4012		7.99032	2158.62	1910.98	442.141	2.8421	4.32618	28.5338	30.6898		7.5099	2046.81	1987.17	1495.02	1.11852	1.69571
1713	2020	9	10	21	252.875	2020.69	21.383	33.1751	266.986	7.99533	2215.85	1988.85	446.515	2.56571	3.94671	28.9199	32.2131	247.253	7.98803	2168.16	1896.86	445.371	3.16954	4.77809	25.5214	32.5152		7.97434	2165.23	1925.75	463.143	2.75669	4.19708	28.5234	30.6038		7.47233	2042.52	1994.79	1638.74	1.02863	1.5599
1714	2020	9	10	22	252.917	2020.69	21.2286	33.2228	267.04	7.99642	2218.81	1991.91	445.646	2.56239	3.94283	28.9287	32.2963	246.745	7.98093	2171.86	1903.44	454.732	3.13904	4.73094	25.1102	32.9606		7.94935	2191.06	1962.37	500.225	2.64147	4.02234	28.5826	30.6328		7.48276	2043.96	1992.72	1598.02	1.05547	1.60015
1715	2020	9	10	23	252.958	2020.69	21.2605	33.2044	266.882	7.99751	2217.67	1990.19	444.157	2.56849	3.95204	28.921	32.3227	247.556	7.94883	2173.04	1921.56	497.489	2.96325	4.4658	25.23	32.898		7.93837	2187.43	1963.95	514.811	2.59184	3.94593	28.5298	30.6266		7.45019	2043.65	2002.51	1731.65	0.982373	1.48961
1716	2020	9	11	0	253	2020.69	21.3019	33.1515	266.837	7.9946	2214.39	1988.6	447.204	2.55238	3.92727	28.8869	32.3027	248.422	7.90873	2172.15	1941.71	555.578	2.7466	4.13998	25.2908	32.8728		7.93538	2185.96	1963.77	518.753	2.58018	3.92769	28.493	30.6312		7.46162	2043.88	1999.41	1683.39	1.00537	1.52465
1717	2020	9	11	1	253.042	2020.69	21.2478	33.1047	259.812	7.98869	2211.48	1989.49	454.022	2.51428	3.8696	28.827	32.2636	249.755	7.91464	2170.41	1937.84	546.451	2.7674	4.17258	25.0988	32.9794		7.9364	2192.15	1969.74	518.396	2.5789	3.92703	28.472	30.6184		7.47305	2043.25	1995.44	1635.99	1.02874	1.56026
1718	2020	9	11	2	253.083	2020.69	21.2564	33.1549	262.578	7.99178	2214.6	1990.5	450.687	2.53518	3.90124	28.7711	32.2214	250.17	7.91954	2168.53	1934.32	538.922	2.78323	4.19767	25.1946	32.9368		7.94041	2189.68	1965.05	512.326	2.6027	3.96252	28.4376	30.631		7.47948	2043.87	1994.2	1610.33	1.04206	1.58056
1719	2020	9	11	3	253.125	2020.69	21.2921	33.178	259.531	7.99087	2216.03	1991.87	452.012	2.53647	3.90267	28.761	32.2385	250.064	7.91744	2169.29	1936.04	542.15	2.77304	4.18225	25.042	32.9858		7.95043	2192.52	1963.53	499.014	2.64318	4.02554	28.379	30.6308		7.46191	2043.86	1999.74	1681.58	1.00144	1.51924
1720	2020	9	11	4	253.167	2020.69	21.3088	33.1812	260.747	7.99396	2216.23	1990.39	448.258	2.55312	3.92809	28.7679	32.2909	250.005	7.91134	2171.62	1940.87	551.624	2.74733	4.14281	25.0218	32.983		7.94744	2192.35	1965.03	503.08	2.62629	4.00007	28.375	30.6078		7.49633	2042.72	1988.23	1543.46	1.07632	1.63297
1721	2020	9	11	5	253.208	2020.69	21.3076	33.1935	260.247	7.99105	2216.99	1992.47	451.934	2.54037	3.90838	28.7726	32.3192	249.612	7.91924	2172.88	1937.84	539.957	2.79116	4.20854	25.244	32.8134		7.95646	2182.52	1950.87	489.228	2.6733	4.07059	28.312	30.6182		7.48876	2043.24	1991.27	1572.72	1.057	1.60393
1722	2020	9	11	6	253.25	2020.69	21.3227	33.192	260.077	7.99113	2216.9	1992.23	451.81	2.54197	3.91069	28.762	32.3491	249.234	7.92914	2174.21	1933.9	525.623	2.84467	4.28902	24.9956	32.97		7.96047	2191.6	1958.1	485.364	2.68721	4.0933	28.2878	30.5806		7.51519	2041.36	1981.53	1471.67	1.11505	1.69234
1723	2020	9	11	7	253.292	2020.69	21.3934	33.2389	260.42	7.99622	2219.81	1991.61	446.009	2.57792	3.96483	28.7846	32.3602	249.766	7.93504	2174.71	1931.07	517.18	2.87917	4.3406	25.4362	32.7126		7.93949	2176.68	1953.08	511.429	2.59645	3.95223	28.3122	30.5896		7.51462	2041.81	1982.02	1474.09	1.1152	1.69239
1724	2020	9	11	8	253.333	2020.69	21.375	33.2268	259.408	7.99331	2219.06	1992.56	449.451	2.56087	3.93892	28.836	32.364	251.79	7.94094	2174.87	1927.75	508.79	2.91618	4.39562	25.3302	32.7814		7.9535	2180.67	1950.19	492.879	2.66313	4.05436	28.2828	30.4868		7.51705	2036.68	1976.69	1462.51	1.11476	1.69243
1725	2020	9	11	9	253.375	2020.69	21.3579	33.2472	258.197	7.9924	2220.32	1994.19	450.755	2.55718	3.93324	28.855	32.3446	253.684	7.94685	2174.01	1923.86	500.415	2.94792	4.44342	24.7226	33.1086		7.94752	2199.64	1973.15	504.238	2.61255	3.98155	28.3388	30.4702		7.50548	2035.85	1979.26	1505.06	1.08942	1.65376
1726	2020	9	11	10	253.417	2020.69	21.359	33.2732	256	7.99049	2221.94	1996.46	453.344	2.55089	3.92334	28.853	32.3351	253.204	7.95075	2173.59	1921.5	494.976	2.96789	4.47364	25.0476	32.9826		7.93953	2192.33	1968.73	514.035	2.58985	3.94427	28.3496	30.4222		7.50691	2033.46	1976.58	1498.53	1.09095	1.65628
1727	2020	9	11	11	253.458	2020.69	21.3946	33.3003	259.749	7.99758	2223.62	1994.07	444.917	2.59134	3.98494	28.87	32.3151	252.997	7.95465	2172.7	1918.64	489.517	2.98885	4.50522	25.2316	32.8846		7.94555	2186.65	1959.76	504.703	2.62574	3.99765	28.385	30.4466		7.49534	2034.68	1981.09	1543.06	1.06711	1.61978
1728	2020	9	11	12	253.5	2020.69	21.3463	33.1771	262.262	7.99667	2215.98	1988.57	444.919	2.5691	3.9523	28.8578	32.3025	252.829	7.95755	2172.14	1916.77	485.526	3.00216	4.52562	25.4944	32.727		7.94556	2177.51	1950.35	503.131	2.63313	4.00722	28.3456	30.4352		7.49376	2034.11	1981.2	1548.6	1.06139	1.61135
1729	2020	9	11	13	253.542	2020.69	21.4541	32.9999	262.148	7.99176	2204.98	1981.09	449.272	2.53575	3.90139	28.8809	32.2844	253.117	7.96245	2171.33	1913.37	478.829	3.02963	4.5669	25.6196	32.6616		7.96958	2173.72	1934.29	470.447	2.75827	4.19674	28.324	30.5148		7.48519	2038.08	1987.55	1583.95	1.0449	1.58602
1730	2020	9	11	14	253.583	2020.69	21.7027	32.8237	263.812	7.99985	2194.05	1966.24	437.873	2.57746	3.96447	28.917	32.2605	253.151	7.96735	2170.27	1909.67	472.172	3.05804	4.60948	25.7668	32.4514		7.99659	2161.53	1909.44	434.863	2.88881	4.39566	28.316	30.5306		7.48362	2038.87	1988.78	1590.52	1.04179	1.58126
1731	2020	9	11	15	253.625	2020.69	21.8857	32.7444	265.88	8.00693	2189.14	1957.32	428.749	2.61962	4.02806	28.9627	32.2468	252.002	7.97125	2169.66	1906.75	466.943	3.08315	4.64679	26.1416	32.0518		7.97961	2138.36	1896.72	452.322	2.79037	4.24538	28.267	30.5436		7.48705	2039.51	1988.53	1577.18	1.04796	1.59081
1732	2020	9	11	16	253.667	2020.69	22.014	32.7319	263.593	8.00502	2188.36	1956.68	430.856	2.62052	4.02814	29.031	32.2355	251.182	7.97316	2169.16	1904.8	464.346	3.09985	4.67106	26.1736	31.534		8.01462	2108.34	1854.5	406.612	2.91447	4.43998	28.2066	30.5276		7.48748	2038.72	1987.9	1574.78	1.0457	1.58777
1733	2020	9	11	17	253.708	2020.7	22	32.7265	267.465	8.00411	2188.02	1956.96	431.887	2.61418	4.0186	29.0849	32.228	249.436	7.97406	2168.82	1903.63	463.087	3.10986	4.68541	26.1588	31.1164		8.03464	2084.13	1825.05	381.645	2.9675	4.52638	28.1476	30.5242		7.49891	2038.55	1984.49	1530.38	1.06875	1.62309
1734	2020	9	11	18	253.75	2020.7	21.9879	32.7286	266.169	8.0032	2188.16	1957.61	432.986	2.60886	4.01054	29.1535	32.1903	249.055	7.97696	2167.15	1900.25	459.088	3.12957	4.71451	25.8612	31.639		8.02465	2114.43	1856.54	396.329	2.9493	4.49599	28.199	30.5446		7.46934	2039.56	1994.19	1647.57	1.00651	1.52822
1735	2020	9	11	19	253.792	2020.7	21.9509	32.7396	267.8	8.00929	2188.84	1955.42	425.936	2.63659	4.05347	29.1659	32.1142	248.64	7.92786	2163.76	1923.45	525.806	2.8553	4.30205	25.7236	31.7638		8.01867	2121.67	1866.48	403.996	2.91894	4.45004	28.1662	30.5422		7.47877	2039.44	1991.36	1609.35	1.0255	1.55722
1736	2020	9	11	20	253.833	2020.7	21.9452	32.7455	263.647	8.00138	2189.2	1959.69	435.304	2.59801	3.99417	29.1697	32.1306	247.732	7.92876	2164.49	1923.52	524.593	2.86204	4.31195	25.521	31.871		8.01468	2127.88	1875.07	409.421	2.89068	4.40838	28.1822	30.5662		7.46219	2040.64	1997.4	1677.45	0.991541	1.50547
1737	2020	9	11	21	253.875	2020.7	21.9319	32.7547	263.396	8.00147	2189.77	1960.22	435.283	2.59827	3.99463	29.1629	32.1874	248.472	7.93066	2167.02	1924.54	522.182	2.87698	4.3339	25.5104	31.9588		8.0087	2132.97	1882.31	416.953	2.86872	4.37401	28.0688	30.4852		7.48962	2036.6	1985.83	1564.62	1.04289	1.58441
1738	2020	9	11	22	253.917	2020.7	21.897	32.7854	258.727	7.99756	2191.68	1963.98	440.237	2.57956	3.96596	29.1471	32.2384	249.357	7.93056	2169.29	1926.46	522.633	2.87987	4.33789	25.4692	32.0294		8.00371	2137.06	1888.47	423.326	2.847	4.34062	28.0582	30.461		7.50305	2035.39	1980.68	1512.66	1.0715	1.62805
1739	2020	9	11	23	253.958	2020.7	21.9448	32.8288	259.216	7.99465	2194.37	1967.28	444.127	2.57458	3.95739	29.1209	32.245	249.134	7.93046	2169.58	1926.94	522.834	2.87736	4.33441	25.4202	32.0444		8.00073	2137.93	1891.07	426.988	2.82846	4.31281	28.071	30.4672		7.48348	2035.7	1986.84	1588.14	1.02865	1.56285
1740	2020	9	12	0	254	2020.7	21.9278	32.7681	259.027	7.99774	2190.61	1962.78	439.863	2.58127	3.96841	29.084	32.2462	249.446	7.93137	2169.63	1926.79	521.569	2.87855	4.33672	25.2292	32.055		8.00474	2138.55	1890.96	422.451	2.8319	4.3204	28.0558	30.4698		7.45791	2035.83	1994.7	1691.77	0.97357	1.47922
1741	2020	9	12	1	254.042	2020.7	21.9279	32.689	255.788	7.99582	2185.7	1959.66	441.452	2.56326	3.94145	29.0517	32.2376	250.331	7.93127	2169.25	1926.79	521.686	2.87395	4.33034	24.9876	31.6396		8.01176	2114.46	1869.92	411.362	2.79569	4.27297	28.0498	30.4598		7.45734	2035.33	1994.43	1693.83	0.971733	1.47651
1742	2020	9	12	2	254.083	2020.7	21.9156	32.6837	252.915	7.98891	2185.37	1962.85	449.794	2.52848	3.88814	29.0259	32.2412	249.87	7.93017	2169.41	1927.68	523.311	2.8659	4.31854	25.192	31.282		8.01677	2093.73	1849.23	402.963	2.79864	4.27916	28.026	30.4518		7.45577	2034.94	1994.61	1700.04	0.967228	1.46981
1743	2020	9	12	3	254.125	2020.7	21.9426	32.6806	257.444	7.998	2185.18	1958.05	438.76	2.57415	3.95811	28.9903	32.2406	250.188	7.92907	2169.38	1928.49	524.923	2.85649	4.30486	25.1592	31.3056		8.01379	2095.1	1852.08	406.505	2.78304	4.25543	28.008	30.443		7.4742	2034.5	1988.76	1624.05	1.00495	1.52727
1744	2020	9	12	4	254.167	2020.7	21.9723	32.6719	254.469	7.99409	2184.64	1959.31	443.381	2.55699	3.93149	28.9469	32.2351	249.681	7.92697	2169.14	1929.7	527.969	2.84059	4.28157	24.9698	31.4854		8.0118	2105.52	1862.86	410.177	2.77601	4.24492	27.9998	30.4306		7.45663	2033.88	1993.47	1695.67	0.967115	1.46986
1745	2020	9	12	5	254.208	2020.7	21.9879	32.6238	254.752	7.99318	2181.65	1957.17	444.046	2.54869	3.919	28.9059	32.2356	249.228	7.92587	2169.16	1930.59	529.603	2.83081	4.2674	24.9594	31.4612		8.00982	2104.12	1862.81	412.263	2.76208	4.22402	27.9974	30.4272		7.46105	2033.71	1992	1677.13	0.976079	1.48351
1746	2020	9	12	6	254.25	2020.7	22.0076	32.5682	254.445	7.99227	2178.21	1954.62	444.643	2.53993	3.90584	28.8548	32.2363	249.711	7.92477	2169.19	1931.56	531.248	2.82008	4.25192	24.7168	31.5532		8.00883	2109.45	1869.4	414.198	2.74474	4.19944	27.9668	30.4194		7.48348	2033.32	1985.04	1586.3	1.02233	1.55399
1747	2020	9	12	7	254.292	2020.7	22.011	32.5635	253.074	7.98636	2177.91	1957.22	451.81	2.51159	3.86227	28.8361	32.2457	250.701	7.92367	2169.61	1932.58	532.927	2.81341	4.24202	24.6052	31.744		8.00685	2120.52	1880.13	417.972	2.74628	4.20098	27.9422	30.4116		7.49091	2032.93	1982.53	1557.05	1.03726	1.57685
1748	2020	9	12	8	254.333	2020.7	22.012	32.568	252.158	7.98845	2178.19	1956.43	449.291	2.52208	3.87835	28.8809	32.2439	251.568	7.92158	2169.53	1933.25	535.972	2.80672	4.23133	24.571	31.7238		8.00386	2119.35	1880.94	421.293	2.72565	4.17007	28.0026	30.3966		7.49734	2032.18	1979.67	1532.31	1.05336	1.6011
1749	2020	9	12	9	254.375	2020.7	22.0163	32.5819	255.029	7.99054	2179.06	1956.1	446.87	2.53394	3.89641	28.9029	32.2502	251.5	7.91848	2169.81	1934.87	540.582	2.79338	4.21086	24.394	31.847		8.00288	2126.49	1888.52	423.467	2.71816	4.15938	28.119	30.3962		7.49177	2032.16	1980.89	1554.18	1.04574	1.58894
1750	2020	9	12	10	254.417	2020.7	22.0079	32.5827	251.571	7.98762	2179.1	1957.62	450.432	2.51943	3.87418	28.926	32.2508	251.317	7.91538	2169.84	1936.29	545.194	2.77966	4.18985	24.2512	31.8882		8.00289	2128.88	1891.5	423.829	2.70951	4.14741	28.0868	30.3394		7.5012	2029.33	1975.55	1516.6	1.06294	1.61553
1751	2020	9	12	11	254.458	2020.7	22.0009	32.602	253.279	7.98971	2180.3	1957.65	448.057	2.53087	3.89166	28.941	32.2533	249.645	7.91328	2169.95	1937.32	548.351	2.77054	4.17586	24.158	31.9242		8.00391	2130.97	1893.37	422.962	2.70994	4.1488	28.1138	30.3408		7.49063	2029.4	1978.7	1557.07	1.04051	1.5813
1752	2020	9	12	12	254.5	2020.7	22	32.6126	253.532	7.9858	2180.96	1960.09	452.947	2.51336	3.86465	28.9779	32.2544	249.666	7.91218	2170	1937.64	549.99	2.76857	4.17239	24.1056	31.9896		8.00392	2134.76	1896.82	423.47	2.71255	4.15271	28.114	30.3222		7.48006	2028.47	1981.02	1597.88	1.01656	1.545
1753	2020	9	12	13	254.542	2020.7	21.9828	32.626	252.012	7.98389	2181.79	1961.83	455.433	2.50426	3.85071	29.0214	32.2543	250.18	7.91508	2169.99	1935.85	545.596	2.78779	4.20075	24.303	31.8866		8.00494	2128.79	1890.02	421.411	2.72447	4.1697	28.221	30.3626		7.49848	2030.49	1976.91	1528.09	1.06351	1.61558
1754	2020	9	12	14	254.583	2020.7	21.9592	32.6404	250.009	7.98298	2182.68	1963.18	456.698	2.49945	3.84344	29.0697	32.2599	249.505	7.91998	2170.24	1933.2	538.291	2.81856	4.24638	24.2418	31.9464		8.00495	2132.25	1893.26	421.878	2.72562	4.17154	28.211	30.3666		7.50391	2030.69	1975.49	1507.68	1.07558	1.63396
1755	2020	9	12	15	254.625	2020.7	21.9483	32.6415	253.189	7.98407	2182.75	1962.79	455.361	2.50376	3.85017	29.1016	32.2492	249.083	7.92989	2169.77	1927.53	523.71	2.87277	4.32772	24.1308	32.0302		8.00397	2137.11	1898.51	423.719	2.71977	4.16302	28.199	30.3866		7.48934	2031.68	1980.87	1563.69	1.04322	1.58476
1756	2020	9	12	16	254.667	2020.7	21.9245	32.6379	256.16	7.98416	2182.53	1962.73	455.22	2.5017	3.84729	29.1469	32.2473	248.436	7.94079	2169.68	1921.47	508.106	2.93537	4.42139	24.0546	32.0444		7.99998	2137.93	1901.74	428.54	2.69426	4.12474	28.215	30.4006		7.49877	2032.38	1978.6	1527.97	1.06563	1.61865
1757	2020	9	12	17	254.708	2020.7	21.879	32.6111	255.779	7.98225	2180.87	1962.6	457.343	2.48581	3.82358	29.1709	32.2354	247.228	7.95369	2169.15	1914.1	490.14	3.00671	4.52863	23.9604	32.0994		7.999	2141.12	1905.51	430.172	2.68676	4.11379	28.186	30.3898		7.4772	2031.84	1984.73	1611.46	1.01623	1.5438
1758	2020	9	12	18	254.75	2020.7	21.854	32.5513	254.215	7.97934	2177.16	1961.09	460.408	2.46356	3.79014	29.1817	32.236	246.271	7.96259	2169.18	1909.3	478.123	3.05697	4.60416	23.8908	32.1232		7.99601	2142.5	1908.63	433.932	2.66813	4.08582	28.208	30.3996		7.50163	2032.33	1977.71	1517.1	1.07177	1.62801
1759	2020	9	12	19	254.792	2020.7	21.8268	32.5402	256.051	7.97942	2176.47	1960.66	460.194	2.46043	3.78571	29.1878	32.2357	246.196	7.96849	2169.17	1906.07	470.298	3.09044	4.65448	24.3252	31.3736		8.01403	2099.04	1861.34	407.146	2.71293	4.15758	28.1692	30.3932		7.46506	2032.01	1988.59	1660.58	0.989738	1.50362
1760	2020	9	12	20	254.833	2020.7	21.8253	32.5031	257.617	7.97851	2174.17	1959.19	460.982	2.45208	3.77321	29.187	32.2345	245.047	7.97239	2169.11	1903.93	465.187	3.11209	4.68711	24.496	30.9602		7.99904	2075.07	1848.05	421.042	2.60747	3.99873	28.0832	30.3908		7.47149	2031.89	1986.88	1633.89	0.999894	1.51947
1761	2020	9	12	21	254.875	2020.7	21.8035	32.4962	250.987	7.9696	2173.74	1963.2	472.169	2.40836	3.70622	29.1759	32.2424	244.171	7.97329	2169.46	1903.8	464.063	3.1168	4.69428	24.5248	31.1984		8.00306	2088.88	1857.08	418.227	2.65692	4.07141	28.101	30.4142		7.46891	2033.06	1988.66	1645.07	0.996126	1.51355
1762	2020	9	12	22	254.917	2020.7	21.7401	32.4396	256.038	7.97669	2170.23	1957.38	462.664	2.42954	3.73996	29.154	32.2441	244.948	7.97519	2169.54	1903	461.628	3.12533	4.70745	24.443	31.085		8.00607	2082.31	1850.89	413.943	2.65114	4.06485	28.0426	30.4054		7.47134	2032.62	1987.75	1634.67	0.99861	1.51764
1763	2020	9	12	23	254.958	2020.7	21.6849	32.3015	258.484	7.97678	2161.66	1950.58	461.242	2.41053	3.7125	29.1279	32.2493	244.864	7.9761	2169.77	1902.9	460.514	3.12816	4.71206	24.381	30.6432		8.01109	2056.69	1828.19	404.995	2.619	4.02157	28.0736	30.3576		7.48477	2030.24	1981.39	1580.09	1.02675	1.56049
1764	2020	9	13	0	255	2020.7	21.664	32.2609	259.577	7.97487	2159.14	1949.51	463.245	2.39571	3.69027	29.0972	32.2498	245.929	7.976	2169.79	1903.21	460.674	3.12437	4.70681	24.213	30.1878		8.0151	2030.29	1806.1	397.256	2.57051	3.9546	28.0862	30.3716		7.4762	2030.94	1984.57	1614.43	1.00928	1.53382
1765	2020	9	13	1	255.042	2020.7	21.5583	32.1772	262.73	7.97996	2153.95	1943.54	456.127	2.40108	3.70035	29.0647	32.2539	246.572	7.9789	2169.98	1902.04	456.993	3.13769	4.72733	24.092	29.699		8.00912	2001.95	1786.71	400.222	2.47579	3.81627	28.0444	30.3406		7.46863	2029.39	1985.56	1643.83	0.990151	1.50509
1766	2020	9	13	2	255.083	2020.7	21.5353	32.1497	260.543	7.95405	2152.25	1954.19	488.84	2.28049	3.51498	29.0262	32.2581	247.021	7.9778	2170.16	1903.08	458.46	3.1278	4.71297	24.0618	29.4094		8.00513	1985.16	1775.03	402.427	2.42227	3.73774	28.036	30.3346		7.45006	2029.09	1990.83	1720.68	0.95105	1.44572
1767	2020	9	13	3	255.125	2020.7	21.505	32.1274	261.599	7.97214	2150.86	1944.96	465.389	2.35592	3.63174	28.9797	32.2587	246.733	7.9757	2170.19	1904.61	461.212	3.11108	4.68849	24.1358	30.2		7.99915	2031	1814.68	415.154	2.48991	3.8313	28.015	30.3124		7.44049	2027.98	1992.71	1760.91	0.930074	1.41403
1768	2020	9	13	4	255.167	2020.7	21.449	31.9721	261.423	7.97223	2141.23	1937.23	463.779	2.33539	3.60206	28.9354	32.2663	246.123	7.9216	2170.53	1933.6	536.031	2.81437	4.24186	24.192	30.8972		7.99016	2071.42	1851.47	431.02	2.53053	3.88487	27.9798	30.321		7.45292	2028.41	1989.56	1707.89	0.954191	1.45082
1769	2020	9	13	5	255.208	2020.7	21.381	31.9135	262.693	7.97031	2137.59	1935.52	465.602	2.31518	3.57207	28.8949	32.2673	246.605	7.9185	2170.57	1935.51	540.653	2.79437	4.21226	24.162	30.6462		7.99218	2056.87	1838.85	426.668	2.50947	3.85577	27.9488	30.3374		7.45534	2029.23	1989.72	1698	0.958663	1.45768
1770	2020	9	13	6	255.25	2020.7	21.3667	31.9043	262.031	7.9694	2137.02	1935.55	466.656	2.30903	3.56279	28.856	32.2739	245.942	7.9164	2170.87	1937.09	543.848	2.78033	4.19156	24.2516	31.2444		7.99119	2091.55	1866.96	432.553	2.57945	3.9553	27.9174	30.3304		7.46477	2028.88	1986.71	1658.59	0.976671	1.48525
1771	2020	9	13	7	255.292	2020.7	21.3644	31.9473	266.498	7.97849	2139.69	1933.64	455.764	2.35378	3.63148	28.8488	32.2701	247.258	7.91731	2170.7	1936.55	542.483	2.78393	4.19712	24.1912	31.141		7.98721	2085.56	1864.41	436.484	2.54348	3.90198	27.9286	30.3046		7.4662	2027.59	1985.05	1652.06	0.979002	1.48886
1772	2020	9	13	8	255.333	2020.7	21.3469	31.8689	265.584	7.97558	2134.83	1931.03	458.611	2.33108	3.59734	28.8958	32.2661	248.221	7.91721	2170.52	1936.12	542.575	2.78763	4.2021	24.3428	31.236		7.98322	2091.06	1869.72	442	2.54856	3.90701	27.9538	30.2628		7.46763	2025.51	1982.59	1645.19	0.981202	1.49229
1773	2020	9	13	9	255.375	2020.7	21.3174	31.8513	264.866	7.97467	2133.74	1930.73	459.569	2.32276	3.58494	28.9202	32.2701	249.116	7.91611	2170.7	1936.63	544.224	2.78471	4.19732	24.1842	31.4416		7.98124	2102.98	1881.53	446.143	2.54755	3.90498	28.0644	30.308		7.46906	2027.76	1983.84	1641.26	0.990454	1.50562
1774	2020	9	13	10	255.417	2020.7	21.346	31.8848	262.826	7.97376	2135.81	1932.69	461.022	2.32458	3.58717	28.942	32.274	248.254	7.91401	2170.87	1937.66	547.38	2.77636	4.1844	24.0996	31.296		7.97725	2094.54	1877.11	449.833	2.50528	3.84269	28.2202	30.2774		7.47149	2026.24	1981.12	1631.39	1.00044	1.5202
1775	2020	9	13	11	255.458	2020.7	21.3309	31.9313	263.82	7.97385	2138.7	1935.17	461.357	2.32859	3.59308	28.9076	32.2842	247.214	7.91291	2171.32	1938.82	549.12	2.76831	4.17263	24.0212	29.936		7.99627	2015.69	1804.28	416.402	2.43723	3.75466	28.2738	30.2502		7.47492	2024.88	1978.64	1617.13	1.00874	1.53269
1776	2020	9	13	12	255.5	2020.7	21.3293	31.9721	266.423	7.97694	2141.23	1935.89	457.916	2.34652	3.62037	28.8926	32.2835	247.322	7.91381	2171.29	1938.46	547.768	2.77143	4.17754	23.4894	28.7354		8.00928	1946.08	1744.97	392.937	2.31752	3.59037	28.2518	30.1982		7.47435	2022.29	1976.49	1617.85	1.00438	1.52642
1777	2020	9	13	13	255.542	2020.7	21.3317	31.9723	264.662	7.97303	2141.24	1937.68	462.774	2.32929	3.59377	28.8839	32.2281	247.102	7.91671	2168.83	1935.14	543.085	2.78029	4.19163	23.5144	29.9842		7.9843	2018.48	1815.37	430.673	2.34566	3.61821	28.4548	30.185		7.47677	2021.63	1974.39	1608.81	1.01716	1.54492
1778	2020	9	13	14	255.583	2020.7	21.3319	31.979	264.538	7.97411	2141.66	1937.52	461.482	2.33486	3.60229	28.8958	32.2095	247.603	7.93962	2168	1922.71	509.743	2.89987	4.37195	23.4866	30.684		7.99831	2059.06	1842.48	420.032	2.48301	3.82202	28.4634	30.115		7.4772	2018.14	1971	1605.21	1.01536	1.5425
1779	2020	9	13	15	255.625	2020.7	21.3148	32.0367	265.834	7.9752	2145.24	1940.14	460.679	2.34435	3.61657	28.8779	32.1885	246.869	7.95752	2167.07	1912.77	484.948	2.9925	4.51211	23.5208	31.138		8.00333	2085.38	1861.34	417.802	2.56001	3.9349	28.483	29.6978		7.48163	1997.33	1950.36	1576.41	1.00729	1.5323
1780	2020	9	13	16	255.667	2020.7	21.326	32.1325	266.131	7.97929	2151.18	1943.15	456.527	2.37375	3.66093	28.8607	32.1931	246.265	7.96442	2167.27	1909.41	475.755	3.029	4.56735	23.424	31.3092		8.00034	2095.31	1871.54	422.594	2.55613	3.92811	28.54	30.2588		7.48706	2025.31	1974.37	1570.74	1.0465	1.58867
1781	2020	9	13	17	255.708	2020.7	21.3279	32.1688	266.257	7.98038	2153.43	1944.51	455.527	2.38268	3.67435	28.8347	32.218	246.32	7.96532	2168.38	1909.97	474.713	3.0338	4.57468	23.3528	31.4172		7.99736	2101.57	1878.59	426.932	2.54746	3.9144	28.3962	30.2814		7.48449	2026.44	1976.74	1580.7	1.0359	1.57318
1782	2020	9	13	18	255.75	2020.7	21.328	32.1858	265.922	7.98247	2154.49	1944.42	453.12	2.39398	3.69161	28.789	32.2483	246.586	7.96622	2169.73	1910.87	473.717	3.0371	4.57997	23.1962	31.4696		8.00137	2104.61	1880.26	422.717	2.55841	3.93238	28.2758	30.2918		7.48292	2026.95	1978.15	1586.56	1.028	1.56173
1783	2020	9	13	19	255.792	2020.7	21.3258	32.2724	267.152	7.98556	2159.86	1947.46	450.152	2.41714	3.72655	28.7419	32.2645	246.561	7.96512	2170.45	1912.37	475.296	3.02778	4.56643	23.1542	31.5656		7.99939	2110.17	1886.05	425.785	2.55574	3.92771	28.2336	30.3178		7.49135	2028.25	1976.97	1554.25	1.04602	1.58918
1784	2020	9	13	20	255.833	2020.7	21.319	32.2691	265.967	7.98565	2159.65	1947.3	450.013	2.41661	3.72584	28.683	32.2903	247.251	7.96702	2171.6	1912.69	472.967	3.03475	4.5775	23.0906	31.6106		8.0004	2112.78	1888.15	424.974	2.55985	3.93425	28.187	30.2662		7.49578	2025.68	1973.44	1535.68	1.05163	1.5982
1785	2020	9	13	21	255.875	2020.7	21.3239	32.2884	266.862	7.98574	2160.85	1948.22	450.083	2.4195	3.73007	28.6246	32.2806	246.808	7.96592	2171.16	1913.41	474.418	3.02162	4.55867	23.5606	30.6714		7.99442	2058.33	1843.18	424.407	2.47	3.80134	28.0118	30.285		7.5032	2026.62	1972.73	1507.31	1.06184	1.61452
1786	2020	9	13	22	255.917	2020.7	21.3235	32.3283	264.391	7.98483	2163.32	1950.72	451.566	2.41955	3.72978	28.5556	32.1531	248.22	7.96683	2165.49	1909.17	472.629	3.00637	4.5382	23.502	30.34		7.99043	2039.11	1829.66	426.401	2.41051	3.71418	28.0332	30.4026		7.50663	2032.48	1977	1497.64	1.07591	1.63519
1787	2020	9	13	23	255.958	2020.7	21.2483	32.3281	267.487	7.99091	2163.31	1948.36	444.179	2.44116	3.76385	28.504	32.1592	247.755	7.92473	2165.76	1931.53	531.088	2.77804	4.19417	23.4128	30.2706		7.98845	2035.09	1827.86	428.165	2.38646	3.67884	27.984	30.4154		7.49906	2033.12	1980.08	1526.18	1.0573	1.60708
1788	2020	9	14	0	256	2020.7	21.2405	32.3651	267.485	7.993	2165.61	1949.33	442.006	2.45416	3.78363	28.4439	32.1625	248.331	7.92063	2165.91	1934.15	537.156	2.75146	4.15481	23.3166	30.094		7.98846	2024.85	1820.07	426.735	2.35943	3.64017	27.8146	30.2544		7.51849	2025.09	1967.46	1449.49	1.08689	1.6538
1789	2020	9	14	1	256.042	2020.7	21.22	32.3731	268.255	7.99609	2166.1	1948.42	438.389	2.46764	3.80454	28.3719	32.1214	248.693	7.92353	2164.08	1931.8	532.691	2.75546	4.16227	23.2864	30.476		7.98448	2047	1840.31	434.504	2.37999	3.66783	27.8312	30.3068		7.52292	2027.7	1968.45	1434.96	1.10032	1.67386
1790	2020	9	14	2	256.083	2020.7	21.2029	32.3049	270.401	7.99618	2161.87	1944.99	437.671	2.45917	3.79229	28.3121	32.1127	249.997	7.92443	2163.69	1931.49	531.359	2.75347	4.16015	23.1564	30.3854		7.98149	2041.75	1838.19	437.304	2.34612	3.61795	27.822	30.2092		7.51035	2022.83	1967.83	1478.02	1.06653	1.62302
1791	2020	9	14	3	256.125	2020.7	21.138	32.204	274.992	8.00227	2155.61	1937.35	429.608	2.47092	3.81202	28.2669	32.1529	251.834	7.92533	2165.48	1932.76	530.314	2.75753	4.16646	23.0752	30.2362		7.97751	2033.09	1833.36	440.808	2.30612	3.55872	27.822	30.1776		7.50378	2021.26	1968.36	1501.52	1.05033	1.59852
1792	2020	9	14	4	256.167	2020.7	21.1134	32.0705	278.889	8.00636	2147.33	1928.71	423.699	2.47321	3.81709	28.233	32.2052	252.794	7.92523	2167.81	1934.87	530.793	2.75871	4.16812	23.0114	30.013		7.97652	2020.15	1823.49	440.112	2.27329	3.51118	27.783	30.181		7.50421	2021.43	1968.54	1499.83	1.04982	1.59793
1793	2020	9	14	5	256.208	2020.7	21.0637	31.8567	279.75	8.00545	2134.07	1918.5	422.89	2.44123	3.77029	28.2098	32.2684	252.759	7.92413	2170.62	1937.78	532.793	2.75682	4.16488	22.962	29.6242		7.97654	1997.61	1805.09	436.831	2.22895	3.44755	27.7062	30.168		7.50063	2020.78	1969.31	1512.48	1.03815	1.58061
1794	2020	9	14	6	256.25	2020.7	21.012	31.6452	278.253	8.00154	2120.95	1909.78	425.542	2.39588	3.70281	28.202	32.3165	253.066	7.92104	2172.76	1941.06	537.642	2.74473	4.14621	22.8214	29.0344		7.97255	1963.41	1779.18	436.535	2.14062	3.3189	27.624	30.2188		7.49106	2023.31	1974.82	1549.74	1.01616	1.54728
1795	2020	9	14	7	256.292	2020.7	20.9232	31.4027	275.657	8.00163	2105.91	1897.83	423.305	2.36255	3.65456	28.2012	32.3525	252.489	7.91694	2174.36	1944.37	543.941	2.72713	4.11925	22.9532	29.2654		7.97457	1976.81	1788.68	436.133	2.18288	3.38047	27.59	30.2026		7.50949	2022.51	1968.68	1479.95	1.0546	1.60606
1796	2020	9	14	8	256.333	2020.7	20.8548	31.2063	280.691	8.00571	2093.73	1886.27	416.935	2.35387	3.64376	28.1809	32.3742	252.498	7.91384	2175.33	1946.82	548.725	2.71148	4.09565	22.9986	29.4354		7.97558	1986.66	1796.17	436.372	2.20826	3.41737	27.5888	30.1896		7.52292	2021.86	1964.04	1431.04	1.08439	1.65151
1797	2020	9	14	9	256.375	2020.7	20.792	30.9324	282.512	8.0078	2076.74	1871.59	412.217	2.32823	3.60746	28.1588	32.3894	253.877	7.90974	2176	1949.55	555.02	2.69009	4.06346	23.0108	30.1134		7.9716	2025.97	1830.47	446.862	2.26241	3.49326	27.6232	30.1984		7.51335	2022.3	1967.2	1465.88	1.06447	1.62094
1798	2020	9	14	10	256.417	2020.7	20.7527	30.8029	275.677	8.00089	2068.7	1868.25	418.853	2.28079	3.53566	28.1309	32.4047	254.034	7.90864	2176.69	1950.83	556.802	2.68333	4.05345	22.9866	29.5488		7.97561	1993.24	1801.7	437.29	2.21918	3.43306	27.6948	30.1934		7.51578	2022.05	1965.96	1457.25	1.07275	1.63322
1799	2020	9	14	11	256.458	2020.7	20.7182	30.6478	277.257	8.00198	2059.08	1859.94	416.258	2.26613	3.51485	28.1019	32.4064	253.824	7.90654	2176.76	1952.14	560.029	2.67022	4.03401	23.0376	29.9684		7.97763	2017.57	1820.69	438.425	2.27555	3.51491	27.877	30.1422		7.52221	2019.49	1960.95	1433.65	1.09286	1.66317
1800	2020	9	14	12	256.5	2020.7	20.6799	30.6196	277.779	8.00407	2057.33	1857.81	413.668	2.26905	3.52003	28.0866	32.4113	253.399	7.90444	2176.98	1953.45	563.286	2.65874	4.01682	23.0482	29.7474		7.98264	2004.75	1807.81	430.696	2.27491	3.51636	27.8198	30.1244		7.52164	2018.61	1960.54	1435.01	1.08825	1.65654
1801	2020	9	14	13	256.542	2020.7	20.664	30.5932	279.914	8.00716	2055.7	1855.18	410.001	2.2783	3.5348	28.0549	32.3951	253.284	7.90535	2176.26	1952.67	561.812	2.65878	4.01745	23.0424	29.5946		7.98966	1995.89	1797.46	421.36	2.28864	3.53942	27.7506	30.0798		7.51506	2016.38	1960.75	1457.24	1.06823	1.62665
1802	2020	9	14	14	256.583	2020.7	20.6561	30.5159	282.868	8.00825	2050.9	1850.74	408.129	2.27405	3.52909	28.043	32.393	252.723	7.90525	2176.16	1952.73	561.956	2.65698	4.01491	23.007	29.2288		7.99767	1974.69	1776.69	409.429	2.28135	3.5329	27.8478	29.8814		7.52749	2006.48	1947.54	1408.48	1.09147	1.66263
1803	2020	9	14	15	256.625	2020.7	20.647	30.439	282.651	8.01034	2046.13	1845.89	405.173	2.27404	3.52999	28.0349	32.3884	253.628	7.90815	2175.96	1951.2	557.497	2.6703	4.03518	22.9908	28.9486		8.00269	1958.44	1761.22	401.732	2.27149	3.52122	27.8998	29.9506		7.51492	2009.94	1954.29	1455.18	1.06819	1.62654
1804	2020	9	14	16	256.667	2020.7	20.652	30.4503	282.158	8.00543	2046.83	1848.61	410.683	2.2545	3.49949	28.0003	32.3829	252.59	7.91105	2175.72	1949.82	553.079	2.68107	4.05197	22.9624	28.8996		8.0197	1955.6	1751.66	383.201	2.33768	3.62475	28.055	30.0598		7.50735	2015.38	1960.98	1486.3	1.06267	1.61675
1805	2020	9	14	17	256.708	2020.7	20.6427	30.4567	279.471	8.00252	2047.23	1850.28	413.978	2.24197	3.48005	27.932	32.3454	253.274	7.91895	2174.05	1945.09	541.056	2.71095	4.09842	22.9252	28.8482		8.01372	1952.62	1752.07	389.123	2.30283	3.57173	27.9368	30.139		7.48478	2019.33	1971.83	1573.43	1.01163	1.53928
1806	2020	9	14	18	256.75	2020.7	20.6439	30.4652	277.46	8.0016	2047.76	1851.12	415.072	2.23908	3.47547	27.8734	32.2936	254.439	7.92885	2171.74	1938.77	526.288	2.75087	4.16011	22.8826	28.8122		8.01373	1950.53	1750.63	388.842	2.29546	3.56118	27.7702	30.2236		7.48621	2023.55	1975.94	1569.34	1.01175	1.53983
1807	2020	9	14	19	256.792	2020.7	20.65	30.4998	279.206	8.00269	2049.9	1852.4	414.158	2.24791	3.48876	27.846	32.2666	253.664	7.93275	2170.54	1936.07	520.537	2.76567	4.18315	22.8694	28.6774		8.01775	1942.72	1742.55	383.625	2.29697	3.56537	27.627	30.329		7.48964	2028.81	1980.32	1558.2	1.01803	1.54956
1808	2020	9	14	20	256.833	2020.7	20.6637	30.5047	279.702	8.00378	2050.21	1852.08	412.986	2.2542	3.49835	27.8311	32.2705	253.264	7.93165	2170.71	1936.87	522.142	2.75896	4.17315	22.7666	28.8198		8.00676	1950.97	1754.74	396.343	2.25693	3.50242	27.6532	30.243		7.48307	2024.52	1978.21	1581.53	1.0012	1.52423
1809	2020	9	14	21	256.875	2020.7	20.6369	30.4686	276.508	7.99987	2047.97	1852.1	417.046	2.23149	3.46371	27.8093	32.2804	253.639	7.93056	2171.15	1937.93	523.791	2.75217	4.16305	22.7014	29.3068		7.99178	1979.21	1784.94	416.653	2.23972	3.47041	27.5598	30.3028		7.51049	2027.5	1973.1	1478.68	1.06016	1.61416
1810	2020	9	14	22	256.917	2020.7	20.6439	30.4676	277.204	8.00196	2047.91	1851.09	414.695	2.24085	3.4782	27.7799	32.2989	253.886	7.92946	2171.98	1939.34	525.501	2.74546	4.1531	22.6886	29.49		7.99079	1989.83	1794.24	419.236	2.25379	3.49015	27.437	30.3642		7.50992	2030.57	1976.57	1481.78	1.05656	1.60897
1811	2020	9	14	23	256.958	2020.7	20.6439	30.4766	275.962	8.00205	2048.46	1851.51	414.674	2.24219	3.48018	27.755	32.309	253.923	7.92736	2172.43	1940.92	528.61	2.73331	4.13495	22.7246	29.2576		7.99381	1976.36	1781.55	413.979	2.24503	3.479	27.6218	30.449		7.50335	2034.8	1981.73	1509.21	1.05336	1.60275
1812	2020	9	15	0	257	2020.7	20.6439	30.4784	274.212	8.00314	2048.58	1851.13	413.473	2.24704	3.48769	27.7219	32.3155	253.731	7.92526	2172.72	1942.44	531.717	2.72009	4.1153	22.8096	29.0892		7.97982	1966.59	1778.86	428.526	2.17533	3.37217	27.5358	30.312		7.53078	2027.96	1967.45	1406.04	1.1061	1.68417
1813	2020	9	15	1	257.042	2020.7	20.644	30.4807	272.699	8.00223	2048.72	1851.65	414.511	2.2434	3.48201	27.6893	32.3238	253.768	7.92316	2173.09	1944.02	534.851	2.70713	4.09603	22.629	29.2608		7.98384	1976.54	1786.58	425.309	2.19565	3.40333	27.4892	30.3558		7.53121	2030.15	1969.51	1405.4	1.10716	1.6858
1814	2020	9	15	2	257.083	2020.7	20.6448	30.4785	273.856	8.00332	2048.58	1851.05	413.276	2.24789	3.48899	27.6529	32.3283	254.242	7.92206	2173.29	1944.99	536.509	2.69854	4.08346	22.559	30.1406		7.97585	2027.55	1832.86	441.978	2.24711	3.47365	27.4824	30.2854		7.52064	2026.64	1969.53	1441.1	1.0791	1.64349
1815	2020	9	15	3	257.125	2020.7	20.6449	30.533	274.232	8.0024	2051.96	1854.28	414.771	2.24981	3.4914	27.6129	32.3125	254.883	7.92096	2172.58	1945.28	538.046	2.68775	4.06782	22.5796	30.0408		7.96587	2021.77	1832.22	453.163	2.19619	3.39582	27.441	30.2076		7.52107	2022.76	1966	1437.46	1.07471	1.63743
1816	2020	9	15	4	257.167	2020.7	20.6428	30.6433	277.629	8.00549	2058.8	1858.66	412.285	2.27476	3.52897	27.5799	32.317	253.885	7.91987	2172.78	1946.22	539.71	2.67954	4.05576	22.641	29.9644		7.96888	2017.34	1826.84	448.847	2.20599	3.41124	27.3706	30.1726		7.5245	2021.01	1963.64	1424.09	1.07792	1.64286
1817	2020	9	15	5	257.208	2020.7	20.6305	30.6011	278.061	8.00358	2056.19	1857.39	414.049	2.26099	3.50817	27.54	32.3193	255.233	7.91977	2172.89	1946.64	539.889	2.67549	4.05013	22.6208	30.2342		7.9599	2032.98	1843.89	462.217	2.19379	3.38966	27.2766	30.1662		7.52492	2020.69	1963.58	1422.01	1.07462	1.63834
1818	2020	9	15	6	257.25	2020.7	20.633	30.6238	277.489	8.00167	2057.59	1859.4	416.39	2.25539	3.49922	27.5029	32.3137	254.105	7.91967	2172.64	1946.76	540.018	2.67099	4.04385	22.6016	30.0934		7.95991	2024.82	1837.18	460.946	2.17824	3.36731	27.2582	30.1908		7.53635	2021.92	1961.32	1382.64	1.1013	1.67898
1819	2020	9	15	7	257.292	2020.7	20.6101	30.6074	277.365	7.99876	2056.58	1859.98	419.525	2.23933	3.47469	27.4869	32.3103	254.349	7.92057	2172.49	1946.31	538.676	2.67368	4.04816	22.6418	30.4682		7.96493	2046.55	1852.89	458.053	2.24041	3.45898	27.2248	30.3296		7.52478	2028.84	1971.31	1426.29	1.0797	1.64547
1820	2020	9	15	8	257.333	2020.71	20.603	30.5086	282.415	8.00685	2050.45	1851.33	409.609	2.26295	3.51243	27.4879	32.2928	254.767	7.93347	2171.71	1939.27	519.873	2.7373	4.14466	22.6502	30.3938		7.96894	2042.23	1847.49	452.48	2.25073	3.47563	27.182	30.265		7.52921	2025.62	1967.18	1408.92	1.08501	1.65414
1821	2020	9	15	9	257.375	2020.71	20.6089	30.5636	276.125	7.99794	2053.86	1858.07	420.066	2.23109	3.46236	27.4909	32.2874	255.322	7.93737	2171.47	1937.1	514.301	2.75702	4.17453	22.6536	30.2824		7.97496	2035.77	1839.46	444.251	2.26548	3.49958	27.1828	30.3084		7.55064	2027.78	1962.61	1336.63	1.13742	1.73378
1822	2020	9	15	10	257.417	2020.71	20.6019	30.5597	276.067	7.99803	2053.62	1857.87	419.93	2.2305	3.46155	27.5569	32.2811	256.985	7.93827	2171.19	1935.94	512.954	2.76742	4.18948	22.6516	30.2756		7.98497	2035.38	1834.73	432.326	2.30815	3.56559	27.28	30.229		7.53907	2023.82	1962.15	1374.3	1.11042	1.69255
1823	2020	9	15	11	257.458	2020.71	20.604	30.6013	277.707	7.99712	2056.2	1860.42	421.333	2.23119	3.46216	27.5562	32.2835	256.05	7.93917	2171.29	1935.57	511.7	2.77222	4.19672	22.732	30.1518		7.99099	2028.2	1825.59	424.334	2.32814	3.59708	27.4736	30.2364		7.5435	2024.19	1960.36	1360.15	1.12975	1.72094
1824	2020	9	15	12	257.5	2020.71	20.6059	30.6464	275.119	7.9912	2059	1865.35	428.502	2.21097	3.43031	27.5599	32.2845	257.18	7.94108	2171.34	1934.61	509.035	2.78247	4.21218	22.7186	30.4464		8.002	2045.28	1834.77	414.118	2.40782	3.71691	27.5328	30.1778		7.54293	2021.27	1957.62	1360.96	1.12816	1.71853
1825	2020	9	15	13	257.542	2020.71	20.6179	30.6579	274.824	7.99429	2059.71	1864.52	425.059	2.22624	3.45377	27.5519	32.1903	257.155	7.94298	2167.15	1930.46	505.843	2.78249	4.21335	22.8374	30.4242		7.98802	2044	1839.25	429.971	2.35265	3.63079	27.974	30.1168		7.53135	2018.23	1956.62	1401.14	1.11724	1.69988
1826	2020	9	15	14	257.583	2020.71	20.6069	30.6051	274.083	7.99338	2056.43	1862.24	425.625	2.21594	3.43845	27.5363	32.196	256.972	7.94688	2167.4	1928.8	500.482	2.80169	4.24257	23.004	30.1746		8.02903	2029.52	1807.43	382.603	2.52707	3.90121	27.5768	30.1158		7.53678	2018.18	1956.5	1380.68	1.11257	1.6949
1827	2020	9	15	15	257.625	2020.71	20.6198	30.6555	274.686	7.99547	2059.56	1863.86	423.691	2.23115	3.46141	27.538	32.2138	255.194	7.91278	2168.19	1946.41	549.615	2.63086	3.98368	22.9606	30.0052		8.00505	2019.7	1810.76	407.267	2.3941	3.69838	27.9066	29.662		7.52321	1995.54	1938.56	1418.46	1.07378	1.63661
1828	2020	9	15	16	257.667	2020.71	20.606	30.7463	274.678	7.99456	2065.19	1869.08	425.547	2.23573	3.46771	27.5999	32.2468	255.605	7.92268	2169.66	1942.23	535.127	2.68906	4.07066	23.2284	29.8122		7.98906	2008.51	1806.92	423.78	2.32453	3.59049	27.8554	29.8958		7.52664	2007.2	1948.43	1411.85	1.09051	1.66106
1829	2020	9	15	17	257.708	2020.71	20.5191	30.9686	270.453	7.99465	2078.98	1881.19	427.436	2.25259	3.49238	27.6575	32.2578	254.09	7.93158	2170.15	1937.75	522.27	2.74066	4.14789	23.2638	29.7832		7.98008	2006.83	1809.25	433.987	2.28513	3.52961	27.848	30.3792		7.53207	2031.31	1968.88	1404.42	1.12603	1.71248
1830	2020	9	15	18	257.75	2020.71	20.5209	30.9977	275.423	7.99474	2080.79	1882.65	427.595	2.25618	3.49764	27.687	32.2693	254.719	7.93548	2170.66	1935.97	516.756	2.76456	4.18355	23.3802	29.4044		7.98209	1984.87	1789.45	428.509	2.26326	3.49914	27.5688	30.3692		7.5045	2030.82	1977.92	1502.61	1.05012	1.59849
1831	2020	9	15	19	257.792	2020.71	20.4989	31.0375	276.59	7.99583	2083.26	1884.38	426.697	2.26331	3.50849	27.7219	32.2615	254.954	7.93838	2170.31	1933.97	512.585	2.78214	4.20977	23.1442	29.8492		7.96911	2010.66	1817.97	447.611	2.23518	3.45287	27.4258	25.0058		7.52493	1763.29	1725.41	1299.59	0.847427	1.31867
1832	2020	9	15	20	257.833	2020.71	20.4344	30.9836	279.166	8.00092	2079.91	1879.74	420.398	2.27444	3.52688	27.7448	32.2476	254.158	7.93829	2169.7	1933.37	512.629	2.78253	4.21021	23.1524	29.989		7.95912	2018.76	1828.97	461.055	2.20777	3.4089	27.4068	25.4276		7.51036	1784.33	1748.69	1357.29	0.838549	1.30231
1833	2020	9	15	21	257.875	2020.71	20.3645	30.9759	273.986	7.995	2079.44	1882.43	427.074	2.24254	3.47811	27.749	32.2324	253.897	7.93719	2169.02	1933.37	514.089	2.77582	4.20017	23.156	30.164		7.96514	2028.91	1834.79	455.165	2.25155	3.47453	27.3648	24.3792		7.49778	1732.03	1703.14	1373.25	0.772095	1.20537
1834	2020	9	15	22	257.917	2020.71	20.418	30.9797	274.097	7.99709	2079.67	1881.35	424.717	2.25619	3.49877	27.7303	32.2136	252.595	7.93509	2168.18	1933.92	516.964	2.76143	4.17884	23.1032	30.4344		7.95815	2044.59	1851.23	466.216	2.24495	3.46193	27.4378	26.409		7.52321	1833.28	1790.7	1338.32	0.906186	1.40094
1835	2020	9	15	23	257.958	2020.71	20.4033	30.9768	272.975	7.99718	2079.49	1881.26	424.587	2.25509	3.49723	27.6909	32.2101	251.733	7.92999	2168.03	1936.65	524.252	2.73126	4.13374	23.0758	30.3246		7.95617	2038.22	1846.96	467.73	2.22315	3.42974	27.4248	25.8504		7.51164	1805.42	1767.91	1363.39	0.859528	1.3322
1836	2020	9	16	0	258	2020.71	20.4348	30.9608	272.849	7.99927	2078.5	1879.29	422.064	2.26494	3.51237	27.646	32.201	252.009	7.92289	2167.62	1940.2	534.514	2.69023	4.07231	23.0358	30.6788		7.95918	2058.76	1863.01	467.092	2.2688	3.49676	27.368	25.2988		7.51707	1777.9	1741.14	1331.75	0.843843	1.31148
1837	2020	9	16	1	258.042	2020.71	20.4477	30.9442	272.23	7.99936	2077.47	1878.3	421.817	2.2646	3.5119	27.585	32.2003	252.994	7.91879	2167.59	1942.64	540.563	2.66388	4.03322	23.0146	30.638		7.9512	2056.39	1864.68	476.871	2.22864	3.43548	27.326	28.1434		7.5345	1919.79	1867.85	1341.12	1.00365	1.541
1838	2020	9	16	2	258.083	2020.71	20.429	30.9553	269.459	7.99945	2078.16	1878.96	421.812	2.26466	3.51205	27.5221	32.2011	254.41	7.91669	2167.63	1944.16	543.705	2.64761	4.00938	23.043	30.5858		7.95321	2053.36	1861.09	473.822	2.23427	3.44444	27.398	26.8458		7.53493	1855.07	1807.85	1309.97	0.947517	1.46223
1839	2020	9	16	3	258.125	2020.71	20.4135	30.965	269.47	7.99754	2078.76	1880.42	424.076	2.2562	3.49897	27.463	32.2003	254.181	7.9166	2167.59	1944.6	543.873	2.64154	4.00093	23.055	30.8518		7.94523	2068.79	1877.38	486.572	2.22771	3.43148	27.269	26.9268		7.53136	1859.11	1812.98	1322.92	0.939155	1.44939
1840	2020	9	16	4	258.167	2020.71	20.4109	30.9789	269.92	7.99763	2079.62	1881.12	424.099	2.25784	3.50139	27.404	32.2087	255.374	7.9195	2167.97	1943.9	539.661	2.6512	4.01623	23.0566	31.0554		7.93624	2080.59	1891.17	500.394	2.20966	3.40164	27.2402	25.5352		7.52179	1789.7	1751.31	1321.36	0.858196	1.33281
1841	2020	9	16	5	258.208	2020.71	20.3977	30.9883	269.344	7.99672	2080.2	1882.1	425.224	2.25384	3.49523	27.352	32.2117	255.733	7.9254	2168.1	1941.47	531.072	2.67604	4.05449	23.0314	31.1242		7.93426	2084.58	1895.55	503.723	2.20596	3.39552	27.201	23.8186		7.51322	1704.07	1673.81	1307.81	0.769766	1.20575
1842	2020	9	16	6	258.25	2020.71	20.0734	31.2422	272.363	7.99781	2095.95	1896.99	426.211	2.25922	3.50398	27.3039	32.2208	256.269	7.9283	2168.5	1940.7	526.953	2.68689	4.07145	23.012	31.205		7.93827	2089.27	1897.84	499.094	2.22946	3.43108	27.1572	30.3354		7.52664	2029.13	1971.28	1419.56	1.08135	1.64831
1843	2020	9	16	7	258.292	2020.71	19.6579	31.4629	276.989	7.99789	2109.64	1911.23	428.031	2.24936	3.49026	27.2739	32.2304	256.26	7.9302	2168.93	1940.31	524.29	2.69451	4.08327	23.0338	31.069		7.94829	2081.38	1886.69	484.585	2.26084	3.48051	27.1028	30.5668		7.52007	2040.67	1984.09	1448.45	1.07474	1.63731
1844	2020	9	16	8	258.333	2020.71	19.6342	31.4814	278.341	7.99798	2110.79	1912.31	428.091	2.24976	3.49093	27.2579	32.2364	256.275	7.9351	2169.2	1938.19	517.341	2.71829	4.11946	23.0272	31.181		7.9813	2087.87	1877.19	444.142	2.41865	3.72234	27.0234	30.6062		7.5185	2042.64	1986.69	1454.75	1.06963	1.62972
1845	2020	9	16	9	258.375	2020.71	19.4986	31.5451	280.363	7.99807	2114.74	1916.5	428.54	2.24592	3.48556	27.2859	32.246	258.503	7.939	2169.62	1936.37	511.875	2.74171	4.15448	23.0354	31.3126		7.99632	2095.5	1876.38	427.393	2.50302	3.85066	27.1048	30.5816		7.53693	2041.41	1979.6	1389.3	1.11456	1.69789
1846	2020	9	16	10	258.417	2020.71	19.417	31.5718	278.714	7.99216	2116.4	1921.07	435.629	2.21689	3.44097	27.32	32.2469	258.041	7.9409	2169.66	1935.19	509.196	2.75479	4.17384	23.1126	31.104		7.97833	2083.41	1874.3	447.083	2.40425	3.70011	27.2148	30.666		7.53036	2045.62	1985.04	1414.74	1.10792	1.68674
1847	2020	9	16	11	258.458	2020.71	19.4881	31.5421	278.073	7.99036	2114.56	1919.84	437.478	2.21181	3.43275	27.3329	32.256	257.725	7.94181	2170.07	1934.95	507.982	2.76151	4.18376	23.1682	31.0632		8.00035	2081.04	1861.72	420.731	2.50634	3.85707	27.24	30.6242		7.53779	2043.54	1980.74	1387.9	1.12455	1.71216
1848	2020	9	16	12	258.5	2020.71	19.4449	31.6702	277.987	7.99056	2122.5	1926.74	438.412	2.2223	3.44823	27.3557	32.263	259.027	7.94571	2170.38	1933.05	502.588	2.78446	4.21815	23.2136	31.216		7.99336	2089.9	1871.93	430.044	2.49429	3.83636	27.2486	30.593		7.53722	2041.98	1979.45	1389.17	1.12209	1.70853
1849	2020	9	16	13	258.542	2020.71	19.462	31.7274	278.603	7.99177	2126.05	1929.08	437.528	2.23463	3.46668	27.4058	32.2689	259.451	7.94861	2170.64	1931.4	498.592	2.80493	4.24842	23.2566	31.1774		8.01538	2087.67	1859.3	404.586	2.59849	3.99658	27.296	30.565		7.53765	2040.58	1977.85	1387.21	1.12385	1.71111
1850	2020	9	16	14	258.583	2020.71	19.463	31.7532	276.777	7.99197	2127.65	1930.33	437.529	2.2382	3.47199	27.4158	32.2904	257.607	7.95051	2171.6	1931.1	496.101	2.81786	4.26764	23.2658	31.1964		8.04739	2088.77	1844.36	370.483	2.75967	4.24414	27.2082	30.3686		7.54507	2030.79	1966.96	1356.83	1.12817	1.71923
1851	2020	9	16	15	258.625	2020.71	19.5202	31.6433	276.451	7.99317	2120.83	1923.67	435.123	2.23667	3.47011	27.4792	32.3177	256.921	7.95376	2172.81	1929.89	491.785	2.84374	4.30566	23.3894	30.8148		8.02841	2066.64	1835.02	387.697	2.63228	4.0513	27.3458	30.3816		7.5405	2031.43	1968.41	1373.24	1.12401	1.71208
1852	2020	9	16	16	258.667	2020.71	19.5696	31.6799	279.933	7.99737	2123.1	1923.37	430.574	2.26249	3.5094	27.5487	32.3443	256.633	7.95801	2174	1928.08	486.143	2.87562	4.35268	23.4084	30.8098		7.99042	2066.35	1852.66	430.198	2.45344	3.77592	27.2574	30.3964		7.53293	2032.17	1971.76	1399.4	1.10305	1.68053
1853	2020	9	16	17	258.708	2020.71	19.7099	31.3158	284.298	8.00257	2100.52	1901.13	421.374	2.2584	3.50523	27.603	32.3531	257.026	7.96626	2174.39	1923.67	475.171	2.92587	4.42788	23.54	30.3778		7.98544	2041.3	1833.48	432.539	2.39523	3.68979	27.2916	28.0432		7.53236	1914.79	1863.98	1345.76	0.993107	1.52557
1854	2020	9	16	18	258.75	2020.71	19.71	31.3431	282.331	7.99878	2102.21	1904.24	425.95	2.24489	3.484	27.648	32.3589	256.016	7.97151	2174.65	1920.76	468.293	2.95927	4.47772	23.5842	30.3134		7.96945	2037.57	1837.28	451.161	2.32079	3.57539	27.2972	29.5826		7.53379	1991.58	1934.12	1377.2	1.06828	1.63175
1855	2020	9	16	19	258.792	2020.71	19.71	31.3487	281.116	7.99998	2102.56	1904	424.624	2.25064	3.49288	27.6728	32.3564	255.03	7.97476	2174.54	1918.76	464.05	2.97916	4.5075	23.571	30.297		7.96247	2036.62	1839.67	459.622	2.28741	3.52428	27.228	24.7348		7.52222	1749.77	1714.14	1300.96	0.824237	1.28503
1856	2020	9	16	20	258.833	2020.71	19.7141	31.4449	278.195	7.99718	2108.53	1910.23	428.7	2.2489	3.48923	27.6746	32.344	254.143	7.97501	2173.98	1918.2	463.663	2.97945	4.50805	23.3836	30.8778		7.94448	2070.29	1876.84	487.816	2.25348	3.46771	27.132	25.7388		7.54365	1799.85	1755.47	1256	0.90448	1.40382
1857	2020	9	16	21	258.875	2020.71	19.7139	31.432	279.225	7.99738	2107.73	1909.47	428.351	2.24842	3.48861	27.6642	32.3466	252.478	7.97625	2174.1	1917.7	462.076	2.98544	4.51722	23.3146	31.0148		7.9375	2078.24	1886.99	498.356	2.23156	3.43328	27.1202	27.886		7.54208	1906.95	1854.66	1309.39	0.999574	1.53725
1858	2020	9	16	22	258.917	2020.71	19.7137	31.4329	276.903	7.99958	2107.78	1908.54	425.828	2.25799	3.50345	27.6469	32.3604	252.289	7.9725	2174.71	1920.29	467.006	2.9647	4.48594	23.254	31.1602		7.93651	2086.67	1894.87	501.057	2.23686	3.44057	27.119	25.6372		7.5395	1794.78	1751.9	1266.58	0.891511	1.38439
1859	2020	9	16	23	258.958	2020.71	19.716	31.4331	278.922	7.99779	2107.8	1909.33	427.896	2.25044	3.49171	27.6115	32.3836	252.162	7.96975	2175.75	1922.8	470.736	2.94856	4.46175	23.314	31.0438		7.94053	2079.92	1887.07	494.588	2.24741	3.45737	27.1042	25.333		7.53393	1779.61	1739.31	1277.08	0.867046	1.34838
1860	2020	9	17	0	259	2020.71	19.7149	31.4247	275.433	7.99799	2107.27	1908.81	427.587	2.25035	3.49167	27.5608	32.4146	253.281	7.931	2177.13	1944.19	524.095	2.74317	4.15129	23.309	31.0428		7.93954	2079.86	1887.48	495.889	2.24267	3.45014	27.0768	25.0616		7.53436	1766.07	1726.74	1269.39	0.854995	1.33147
1861	2020	9	17	1	259.042	2020.71	19.715	31.3896	279.59	8.00119	2105.1	1905.55	423.605	2.26053	3.50778	27.51	32.4325	253.717	7.93125	2177.92	1945.06	523.872	2.74124	4.14885	23.3504	31.092		7.94956	2082.71	1885.16	483.155	2.29443	3.52886	27.0356	26.0408		7.55579	1814.92	1766.53	1224.94	0.938568	1.45514
1862	2020	9	17	2	259.083	2020.71	19.7149	31.3852	279.579	8.00039	2104.82	1905.68	424.477	2.25662	3.50176	27.4659	32.4471	253.674	7.9305	2178.57	1946.27	525.064	2.73455	4.13915	23.3112	31.2678		7.94757	2092.91	1894.79	487.366	2.30028	3.53648	27.0854	24.987		7.55322	1762.35	1718.54	1210.02	0.887036	1.38182
1863	2020	9	17	3	259.125	2020.71	19.713	31.3908	277.621	8.00059	2105.17	1905.9	424.296	2.25792	3.50374	27.434	32.4564	254.077	7.92875	2178.99	1947.7	527.664	2.72346	4.12269	23.3032	31.3286		7.94759	2096.43	1897.77	487.908	2.30583	3.54447	27.103	26.9096		7.54565	1858.25	1808.91	1275.81	0.960943	1.48386
1864	2020	9	17	4	259.167	2020.71	19.7119	31.3891	277.029	7.9998	2105.07	1906.17	425.193	2.25421	3.49801	27.4079	32.4701	254.172	7.928	2179.59	1948.75	528.848	2.71844	4.11528	23.205	31.6228		7.9466	2113.49	1913.07	491.932	2.32301	3.56899	27.107	23.3648		7.54908	1681.44	1644.55	1186.93	0.808313	1.26948
1865	2020	9	17	5	259.208	2020.71	19.708	31.3951	275.873	8	2105.44	1906.42	425.015	2.25539	3.49983	27.383	32.476	254.836	7.92625	2179.86	1950.01	531.439	2.70775	4.09936	23.2494	31.5468		7.94962	2109.08	1907.74	487.249	2.33242	3.58373	27.0746	25.462		7.55051	1786.04	1741.14	1228.54	0.903045	1.40363
1866	2020	9	17	6	259.25	2020.71	19.1421	32.0893	277.225	7.9942	2148.5	1949.05	437.926	2.25651	3.50021	27.3662	32.4846	254.237	7.9245	2180.24	1951.31	534.053	2.69811	4.0849	23.2688	31.5056		7.95663	2106.69	1902.43	477.733	2.36119	3.62815	27.0402	28.24		7.54293	1924.61	1870.94	1314.33	1.01476	1.55883
1867	2020	9	17	7	259.292	2020.71	19.1248	31.9825	282.937	7.9984	2141.87	1941.69	432.039	2.26244	3.5105	27.3477	32.4873	254.978	7.92175	2180.36	1952.91	538.112	2.68277	4.06188	23.2182	31.545		7.96665	2108.98	1900.06	465.303	2.4063	3.6976	27.024	30.6556		7.55036	2045.1	1979.15	1344.89	1.1466	1.74672
1868	2020	9	17	8	259.333	2020.71	19.1877	31.9036	282.689	7.9996	2136.98	1936.61	429.945	2.2646	3.51401	27.3547	32.4922	255.52	7.918	2180.58	1954.89	543.683	2.6651	4.03498	23.2694	31.4574		7.97966	2103.9	1889.46	448.402	2.46132	3.7825	27.0158	30.7506		7.54579	2049.84	1984.93	1362.51	1.13982	1.73593
1869	2020	9	17	9	259.375	2020.71	19.2479	31.8871	281.916	7.99781	2135.96	1936.15	431.89	2.25994	3.50638	27.3999	32.5013	255.064	7.91525	2180.98	1956.24	547.818	2.65644	4.02121	23.2078	31.4976		7.99668	2106.23	1883.75	428.401	2.54014	3.90388	26.9828	30.7794		7.54822	2051.28	1985.62	1354.81	1.14559	1.74475
1870	2020	9	17	10	259.417	2020.71	19.2457	31.9201	282.732	7.99501	2138	1939.15	435.451	2.25104	3.4923	27.4477	32.4951	256.577	7.9125	2180.71	1957.03	551.883	2.64666	4.00586	23.1072	31.7642		8.03769	2121.69	1876.82	384.587	2.76252	4.24378	27.113	30.7182		7.55265	2048.22	1980.92	1339	1.15922	1.76513
1871	2020	9	17	11	259.458	2020.71	19.3117	31.9068	284.278	7.99821	2137.18	1936.56	431.61	2.26883	3.51944	27.4669	32.4012	257.064	7.91074	2176.53	1954.47	553.909	2.63124	3.98323	23.3728	31.247		7.97271	2091.7	1881.94	455.15	2.4159	3.7138	27.183	30.7592		7.54108	2050.27	1986.1	1379.5	1.13636	1.72972
1872	2020	9	17	12	259.5	2020.71	19.2769	31.9471	282.729	7.99741	2139.68	1939.26	432.896	2.26671	3.51609	27.423	32.4195	255.981	7.91599	2177.34	1952.84	546.171	2.65487	4.01936	23.2506	31.721		8.04272	2119.18	1871.17	378.9	2.79675	4.29514	27.1848	30.7266		7.55651	2048.64	1979.8	1326.61	1.17237	1.7847
1873	2020	9	17	13	259.542	2020.71	19.254	32.0118	281.101	7.99461	2143.69	1944.05	436.752	2.25936	3.50432	27.4162	32.4495	255.845	7.92424	2178.68	1949.85	534.184	2.69832	4.08493	23.435	31.3082		8.00574	2095.25	1868.83	416.381	2.58285	3.96906	27.2592	29.2856		7.55894	1976.77	1913.23	1286.82	1.11019	1.69773
1874	2020	9	17	14	259.583	2020.71	19.2522	32.04	280.507	7.99482	2145.44	1945.45	436.772	2.26297	3.50969	27.4831	32.4656	256.561	7.93249	2179.39	1945.78	522.305	2.7481	4.15924	23.5702	30.9492		8.03175	2074.43	1838.35	385.013	2.68097	4.1225	27.2418	30.6208		7.56736	2043.37	1971.35	1288.92	1.19672	1.82205
1875	2020	9	17	15	259.625	2020.71	19.2494	32.0753	280.798	7.99502	2147.63	1947.22	436.857	2.26723	3.516	27.5398	32.4573	255.5	7.93974	2179.03	1941.4	511.923	2.7901	4.22213	23.5868	31.0746		8.04677	2081.71	1836.61	370.16	2.77249	4.26149	27.2202	28.7844		7.56079	1951.77	1890	1269.75	1.08811	1.66717
1876	2020	9	17	16	259.667	2020.71	19.5022	32.2007	283.543	8.00522	2155.41	1947.33	426.159	2.34576	3.63434	27.6269	32.4412	257.153	7.94499	2178.31	1937.51	504.431	2.82436	4.27298	23.6882	30.9054		8.01378	2071.9	1844.18	404.193	2.59904	3.9957	27.2332	29.8338		7.56522	2004.11	1936.35	1278.59	1.1513	1.75741
1877	2020	9	17	17	259.708	2020.71	19.4419	32.1866	280.745	7.99942	2154.53	1949.69	432.743	2.31356	3.58514	27.7368	32.3923	257.1	7.95324	2176.13	1930.75	492.73	2.87387	4.3469	23.7302	30.8168		7.9898	2066.76	1851.05	430.923	2.47927	3.81212	27.251	28.1826		7.59065	1921.75	1853.79	1166.45	1.12871	1.73315
1878	2020	9	17	18	259.75	2020.71	19.7716	32.2843	281.645	8.01162	2160.6	1946.78	419.582	2.40602	3.72439	27.7789	32.3756	255.934	7.95949	2175.39	1926.61	484.161	2.90966	4.40063	23.7914	30.845		7.98881	2068.39	1852.43	432.296	2.48312	3.81706	27.2328	28.3898		7.58208	1932.08	1865.77	1195.92	1.11834	1.71595
1879	2020	9	17	19	259.792	2020.71	19.7399	32.2417	279.2	8.00783	2157.95	1946.58	423.544	2.38156	3.68721	27.7974	32.3693	253.893	7.96074	2175.11	1925.6	482.441	2.91758	4.41242	23.8166	30.8476		7.98183	2068.54	1855.62	440.626	2.45322	3.77079	27.1688	25.4406		7.59851	1784.98	1727.37	1090.36	1.00254	1.558
1880	2020	9	17	20	259.833	2020.71	19.8863	32.2775	278.517	8.01103	2160.17	1945.9	420.202	2.41225	3.73302	27.7949	32.3573	252.907	7.96299	2174.58	1924.03	479.379	2.92819	4.42863	23.6976	30.9844		7.96584	2076.48	1870.31	461.391	2.38467	3.66519	27.1254	24.8672		7.58794	1756.38	1704.09	1107.96	0.950654	1.48161
1881	2020	9	17	21	259.875	2020.71	19.904	32.2598	277.954	8.01123	2159.08	1944.76	419.819	2.41278	3.73382	27.7879	32.3552	251.567	7.96224	2174.48	1924.41	480.373	2.92324	4.42128	23.6134	31.2248		7.96386	2090.41	1883.31	465.988	2.39377	3.67751	27.1194	27.1734		7.59037	1871.41	1808.59	1146.74	1.07044	1.65103
1882	2020	9	17	22	259.917	2020.71	19.8184	32.2292	274.084	8.00643	2157.18	1946.04	425.038	2.38049	3.68493	27.7695	32.3473	251.685	7.96449	2174.13	1923.11	477.357	2.93266	4.43587	23.6734	31.075		7.95487	2081.73	1879.8	476.113	2.34287	3.60024	27.1628	27.1522		7.59279	1870.35	1806.78	1139.54	1.0767	1.66061
1883	2020	9	17	23	259.958	2020.71	19.8287	32.2053	271.991	8.00463	2155.69	1945.56	426.898	2.3707	3.6699	27.744	32.3413	250.724	7.96474	2173.86	1922.97	477.014	2.93081	4.43351	23.7232	31.0246		7.96389	2078.81	1872.96	464.19	2.38223	3.66074	27.1448	25.4314		7.59122	1784.52	1728.95	1110.07	0.985822	1.5322
1884	2020	9	18	0	260	2020.71	19.828	32.221	270.503	7.99984	2156.67	1948.61	432.608	2.35073	3.63886	27.7158	32.3393	250.345	7.96598	2173.78	1922.46	475.374	2.93446	4.43945	23.7	31.126		7.9709	2084.69	1874.75	456.308	2.42283	3.72229	27.135	25.6562		7.58265	1795.73	1741.5	1138.49	0.978683	1.51955
1885	2020	9	18	1	260.042	2020.71	19.8329	32.2208	268.303	8.00004	2156.66	1948.47	432.37	2.35202	3.64081	27.687	32.3296	251.579	7.96523	2173.34	1922.75	476.335	2.92655	4.42799	23.6718	31.1876		7.97092	2088.26	1877.88	456.819	2.42702	3.72837	27.1256	26.7774		7.58908	1851.66	1790.92	1142.58	1.04776	1.61873
1886	2020	9	18	2	260.083	2020.71	19.8318	32.2186	269.578	7.99924	2156.52	1948.74	433.283	2.34813	3.63481	27.6558	32.3306	251.501	7.96548	2173.39	1922.9	476.034	2.92483	4.42582	23.665	31.2028		7.97093	2089.14	1878.64	456.932	2.42812	3.72996	27.0942	26.0432		7.58951	1815.03	1757.48	1126.71	1.01058	1.56649
1887	2020	9	18	3	260.125	2020.71	19.8283	32.2142	267.669	7.99944	2156.25	1948.44	433.007	2.34828	3.63512	27.6249	32.3231	253.098	7.96573	2173.05	1922.75	475.688	2.92229	4.42249	23.6706	31.2116		7.97495	2089.65	1877.16	452.045	2.448	3.76036	27.1288	24.2832		7.58894	1727.25	1677.1	1093.71	0.924534	1.44506
1888	2020	9	18	4	260.167	2020.71	19.8222	32.2063	268.135	8.00064	2155.76	1947.52	431.534	2.35233	3.64151	27.5955	32.3167	253.476	7.96598	2172.77	1922.63	475.347	2.92002	4.41954	23.5628	31.417		7.97696	2101.56	1886.76	451.317	2.46995	3.79304	27.1056	26.04		7.58437	1814.88	1758.67	1141.22	0.999953	1.54999
1889	2020	9	18	5	260.208	2020.71	19.8269	32.2145	266.806	8.00185	2156.27	1947.35	430.208	2.35897	3.65168	27.5667	32.3155	253.079	7.92023	2172.72	1946.08	539.167	2.67999	4.05663	23.5478	31.472		7.97398	2104.75	1890.88	455.467	2.46065	3.77834	27.1122	27.3056		7.5748	1878	1818.99	1194.89	1.04208	1.60644
1890	2020	9	18	6	260.25	2020.71	19.7312	32.5122	269.907	8.00405	2174.73	1962.42	430.292	2.3923	3.70151	27.5374	32.3026	253.798	7.92248	2172.14	1944.73	535.796	2.68732	4.06824	23.5534	31.4118		7.97399	2101.26	1887.97	454.937	2.4548	3.76992	27.078	30.5892		7.58222	2041.79	1965.91	1240.54	1.2251	1.86638
1891	2020	9	18	7	260.292	2020.71	19.788	32.5945	269.593	8.00225	2179.84	1967.13	433.126	2.39757	3.7084	27.517	32.3048	253.909	7.92373	2172.24	1944.33	533.991	2.69188	4.07538	23.684	31.0778		7.99901	2081.89	1859.4	422.259	2.54731	3.91425	27.037	30.412		7.58865	2032.95	1956.04	1216.88	1.2304	1.87575
1892	2020	9	18	8	260.333	2020.71	19.6849	32.5681	268.567	8.00245	2178.2	1966.39	432.649	2.38705	3.69334	27.4589	32.2684	253.912	7.92398	2170.62	1943.37	533.432	2.68426	4.06498	23.5862	31.4614		8.00502	2104.13	1875.3	418.329	2.61025	4.00773	27.0464	30.3432		7.59508	2029.52	1950.87	1196.01	1.24385	1.89661
1893	2020	9	18	9	260.375	2020.71	19.7235	32.4829	269.658	8.00465	2172.91	1960.67	429.327	2.39132	3.70033	27.4129	32.274	253.971	7.92323	2170.87	1944.27	534.586	2.67668	4.05402	23.421	31.6592		8.02804	2115.6	1874.43	394.11	2.73123	4.19318	26.9962	30.6564		7.59651	2045.14	1964.73	1197.87	1.26183	1.92243
1894	2020	9	18	10	260.417	2020.71	19.7129	32.4448	267.723	8.00386	2170.55	1959.15	429.916	2.38279	3.68756	27.3958	32.2723	254.33	7.92348	2170.79	1944.21	534.219	2.67616	4.05347	23.4278	31.711		8.03005	2118.6	1875.78	392.286	2.74805	4.21834	27.0368	30.6458		7.60094	2044.61	1962.65	1184.5	1.27498	1.94228
1895	2020	9	18	11	260.458	2020.71	19.7027	32.4958	268.323	8.00306	2173.71	1962.24	431.298	2.38369	3.6886	27.3553	32.2653	255.04	7.92373	2170.48	1944.14	533.832	2.67295	4.0492	23.3396	31.862		8.01007	2127.36	1893.47	415.696	2.65735	4.07849	27.0908	30.7346		7.60737	2049.04	1964.32	1167.35	1.29974	1.97913
1896	2020	9	18	12	260.5	2020.71	19.7119	32.5741	270.242	8.00626	2178.57	1964.72	428.271	2.40731	3.72437	27.314	32.2743	256.126	7.92398	2170.88	1944.63	533.543	2.67114	4.04689	23.546	31.6196		8.03308	2113.3	1869.1	388.313	2.76392	4.24232	27.13	30.7126		7.6118	2047.94	1961.72	1154.06	1.31254	1.99852
1897	2020	9	18	13	260.542	2020.71	19.7109	32.5725	268.691	8.00046	2178.47	1967.37	435.023	2.38066	3.68317	27.2776	32.2956	257.443	7.92523	2171.83	1945.02	531.872	2.67593	4.0544	23.775	31.2642		8.0451	2092.7	1844.8	373.065	2.80481	4.30652	27.1686	26.6784		7.61123	1846.72	1780.11	1079.31	1.09439	1.69126
1898	2020	9	18	14	260.583	2020.71	19.7309	32.5356	269.882	8.00066	2176.18	1965.22	434.455	2.37938	3.68132	27.2628	32.3068	257.499	7.92547	2172.33	1945.39	531.586	2.67682	4.05582	23.645	31.5332		8.02211	2108.29	1869.83	399.604	2.70799	4.15629	27.1572	28.9508		7.60965	1960.07	1883.17	1126.46	1.21175	1.85583
1899	2020	9	18	15	260.625	2020.71	19.7723	32.509	274.933	8.01087	2174.53	1958.74	422.397	2.42662	3.75424	27.224	32.3001	257.083	7.92572	2172.03	1945.32	531.201	2.6738	4.0518	23.6214	31.4854		8.01113	2105.52	1873.19	411.537	2.64597	4.0619	27.147	28.844		7.61408	1954.74	1877.05	1111.93	1.21668	1.86417
1900	2020	9	18	16	260.667	2020.71	19.8207	32.4968	274.909	8.01307	2173.78	1956.72	419.778	2.43958	3.77394	27.1881	32.2461	258.122	7.92797	2169.63	1942.59	527.632	2.67669	4.0572	23.8572	31.1446		8.00614	2085.76	1857.89	414.533	2.60462	3.99957	27.183	28.7656		7.60851	1950.83	1875.07	1126.24	1.20006	1.83903
1901	2020	9	18	17	260.708	2020.71	19.8289	32.5213	272.974	8.01127	2175.3	1958.78	422.041	2.43461	3.76596	27.1409	32.243	257.713	7.92922	2169.49	1942.2	525.836	2.67821	4.06014	23.4106	31.8704		7.99116	2127.85	1902.6	437.868	2.57265	3.94762	27.183	24.3576		7.59894	1730.96	1677.81	1068.46	0.950065	1.48417
1902	2020	9	18	18	260.75	2020.71	19.8639	32.5344	269.911	8.01247	2176.11	1958.63	420.782	2.44455	3.78088	27.102	32.2173	258.906	7.93147	2168.35	1940.48	522.474	2.68343	4.06882	23.0622	32.32		7.97717	2153.91	1933.19	458.785	2.52309	3.87093	27.149	28.6424		7.59237	1944.68	1874.5	1170.26	1.15219	1.76666
1903	2020	9	18	19	260.792	2020.71	19.9037	32.5586	270.731	8.01367	2177.61	1959.02	419.618	2.45614	3.7982	27.082	32.1813	258.115	7.93372	2166.75	1938.26	519.062	2.68948	4.07863	23.011	32.3882		7.96919	2157.87	1940.64	469.462	2.48803	3.81706	27.0876	26.1444		7.5938	1820.08	1760.96	1116.68	1.02459	1.58752
1904	2020	9	18	20	260.833	2020.71	20.034	32.6002	272.409	8.01988	2180.19	1957.23	412.951	2.50095	3.86582	27.053	32.1643	257.439	7.93397	2165.99	1937.76	518.62	2.68641	4.07452	23.1738	32.1916		7.9682	2146.47	1930.57	468.977	2.47711	3.80041	27.0008	27.5056		7.58723	1887.98	1825.01	1162.01	1.07518	1.65665
1905	2020	9	18	21	260.875	2020.71	20.012	32.5615	269.493	8.01608	2177.79	1957.24	416.909	2.47699	3.82934	27.0189	32.1839	257.606	7.93822	2166.86	1936.58	512.752	2.7064	4.10507	23.023	32.386		7.96722	2157.74	1941.39	471.96	2.47961	3.80402	26.9604	25.2852		7.58566	1777.23	1724.35	1121.97	0.960001	1.49391
1906	2020	9	18	22	260.917	2020.71	19.9953	32.4243	268.042	8.01428	2169.28	1951.15	417.773	2.45231	3.79259	26.986	32.2284	258.199	7.94047	2168.84	1937.24	509.876	2.71882	4.12385	23.1514	32.2284		7.97223	2148.6	1930.56	464.189	2.49792	3.83223	26.874	25.7314		7.58808	1799.48	1744.4	1123.74	0.983393	1.52752
1907	2020	9	18	23	260.958	2020.71	20.0456	32.4091	267.574	8.01448	2168.34	1949.91	417.411	2.45592	3.79782	26.9663	32.2393	257.77	7.94472	2169.33	1935.63	504.038	2.73955	4.15544	23.0754	32.3048		7.98425	2153.03	1928.96	449.892	2.55641	3.92205	26.8774	26.4524		7.58651	1835.45	1777.71	1142.54	1.01573	1.57263
1908	2020	9	19	0	261	2020.72	20.0946	32.3796	271.361	8.01968	2166.51	1945.55	411.3	2.48117	3.83666	26.9478	32.2375	257.683	7.95297	2169.25	1931.54	492.737	2.77985	4.21683	23.005	32.3694		7.98326	2156.78	1933.01	451.658	2.5523	3.9159	26.8548	25.2782		7.57694	1776.88	1726.64	1145.99	0.938106	1.46034
1909	2020	9	19	1	261.042	2020.72	20.085	32.3737	268.604	8.01889	2166.14	1945.7	412.145	2.47597	3.82876	26.9228	32.2595	257.838	7.95522	2170.23	1931.35	489.832	2.79114	4.23404	23.0304	32.3562		7.97528	2156.01	1936.06	461.474	2.51511	3.85869	26.8656	25.0644		7.57537	1766.21	1717.2	1146.12	0.925288	1.44181
1910	2020	9	19	2	261.083	2020.72	20.081	32.3724	265.131	8.01309	2166.06	1948.43	418.677	2.44852	3.78637	26.9071	32.2663	257.872	7.95547	2170.53	1931.57	489.542	2.79155	4.2348	23.051	32.3298		7.97429	2154.48	1935.13	462.482	2.50949	3.85009	26.802	26.2932		7.5838	1827.5	1771.45	1146.81	0.999084	1.54828
1911	2020	9	19	3	261.125	2020.72	20.0789	32.3732	262.492	8.01129	2166.11	1949.34	420.731	2.44011	3.77338	26.892	32.2772	258.741	7.95472	2171.01	1932.44	490.625	2.78725	4.22836	23.0712	32.3146		7.96931	2153.6	1936.64	468.658	2.48618	3.81426	26.7488	24.3666		7.58923	1731.41	1682.09	1093.15	0.914989	1.43113
1912	2020	9	19	4	261.167	2020.72	20.0841	32.3777	259.828	8.01249	2166.39	1948.97	419.4	2.4466	3.78332	26.8629	32.2707	259.28	7.95496	2170.72	1932.31	490.269	2.78509	4.22554	22.9862	32.4078		7.96432	2159	1944.07	475.881	2.46513	3.782	26.7812	24.6872		7.58866	1747.4	1696.82	1101.16	0.93038	1.45276
1913	2020	9	19	5	261.208	2020.72	20.086	32.3819	259.661	8.01469	2166.65	1948.12	416.937	2.45742	3.8	26.8546	32.2597	259.531	7.95521	2170.23	1931.87	489.876	2.78452	4.22489	23.0284	32.355		7.96234	2155.94	1942.19	477.974	2.4541	3.76512	26.7758	24.49		7.58009	1737.56	1689.94	1120.83	0.904144	1.41319
1914	2020	9	19	6	261.25	2020.72	20.1212	32.3898	262.97	8.0159	2167.14	1947.7	415.644	2.4669	3.81423	26.796	32.195	259.587	7.95646	2167.36	1929.45	487.869	2.77906	4.21809	22.9674	32.4062		7.95735	2158.91	1947.43	484.943	2.43101	3.72987	26.7034	28.7406		7.58351	1949.58	1883.33	1196.97	1.11627	1.71327
1915	2020	9	19	7	261.292	2020.72	20.4337	32.6263	261.384	8.0231	2181.81	1954.07	409.517	2.55428	3.94393	26.7794	32.1908	259.881	7.95771	2167.17	1928.79	486.18	2.78349	4.22507	22.9946	32.3428		7.97437	2155.24	1936.11	462.51	2.50625	3.84561	26.6598	30.5676		7.57194	2040.71	1969.92	1271.01	1.17851	1.79784
1916	2020	9	19	8	261.333	2020.72	20.5446	32.6945	263.272	8.0273	2186.04	1954.67	405.387	2.59207	4.00048	26.7401	32.1764	260.092	7.95896	2166.53	1927.96	484.453	2.78473	4.22763	22.8912	32.5132		7.97538	2165.12	1944.49	462.713	2.51984	3.86598	26.5928	30.6676		7.57437	2045.7	1973.97	1265.22	1.18649	1.80982
1917	2020	9	19	9	261.375	2020.72	20.6854	32.7457	263.316	8.0295	2189.22	1955.13	403.343	2.62128	4.04359	26.7122	32.1653	260.07	7.96021	2166.03	1927.15	482.744	2.78739	4.23216	22.8798	32.5186		7.9804	2165.43	1942.4	456.484	2.54329	3.90204	26.616	30.7682		7.5718	2050.72	1979.24	1275.66	1.18621	1.80871
1918	2020	9	19	10	261.417	2020.72	20.711	32.7092	265.27	8.0297	2186.95	1952.98	402.817	2.62046	4.04238	26.6818	32.153	259.912	7.91546	2165.49	1949.07	545.556	2.55988	3.88721	22.9424	32.206		7.97441	2147.3	1929.94	461.288	2.48752	3.81873	26.7294	30.8184		7.56323	2053.22	1983.74	1304.85	1.17267	1.78718
1919	2020	9	19	11	261.458	2020.72	20.7605	32.7321	268.887	8.03691	2188.37	1950.16	395.112	2.66304	4.10732	26.6319	32.1432	260.346	7.91871	2165.05	1947.51	540.712	2.57019	3.90357	22.7716	32.6646		7.98743	2173.89	1946.69	449.047	2.58296	3.96271	26.9586	30.7252		7.55966	2048.57	1979.68	1315.32	1.16973	1.78194
1920	2020	9	19	12	261.5	2020.72	20.8209	32.721	269.756	8.03611	2187.68	1949.54	395.875	2.66336	4.10726	26.605	32.1389	260.945	7.92096	2164.86	1946.47	537.396	2.57827	3.91621	22.8056	32.6496		8.00444	2173.02	1937.28	428.482	2.66785	4.09271	27.2686	30.7366		7.55509	2049.14	1980.35	1331.87	1.1732	1.78545
1921	2020	9	19	13	261.542	2020.72	20.8181	32.7239	268.07	8.03931	2187.86	1948.1	392.432	2.67934	4.1319	26.654	32.1614	261.391	7.92221	2165.86	1946.3	535.695	2.59086	3.93451	23.0084	32.5726		7.98146	2168.56	1943.52	455.593	2.56559	3.93431	27.2334	30.7468		7.55652	2049.65	1980.51	1327.21	1.17562	1.78928
1922	2020	9	19	14	261.583	2020.72	20.8215	32.7547	265.821	8.03551	2189.77	1951.55	396.793	2.66433	4.10844	26.6955	32.1791	261.469	7.92246	2166.65	1946.5	535.428	2.59748	3.94387	23.0334	32.6268		7.99347	2171.7	1939.98	441.307	2.63213	4.03554	27.3168	30.6806		7.56194	2046.35	1975.45	1308.13	1.18965	1.81053
1923	2020	9	19	15	261.625	2020.72	20.9211	32.7607	272.003	8.04471	2190.15	1946.43	386.899	2.72023	4.19347	26.7252	32.1923	261.385	7.92171	2167.24	1947.12	536.595	2.59773	3.94376	23.1486	32.709		7.96749	2176.47	1955.78	474.429	2.52556	3.87013	27.1908	28.6832		7.56737	1946.72	1883.57	1246.79	1.097	1.68157
1924	2020	9	19	16	261.667	2020.72	20.8923	32.7404	269.664	8.04192	2188.89	1947.05	389.74	2.70113	4.16453	26.7519	32.2077	262.715	7.92196	2167.92	1947.35	536.317	2.6028	3.95097	22.9544	32.7446		7.9925	2178.53	1946.62	443.462	2.63292	4.03652	27.0746	30.574		7.5698	2041.03	1969.16	1279.46	1.19267	1.81709
1925	2020	9	19	17	261.708	2020.72	20.9619	32.7558	266.102	8.03912	2189.84	1948.71	392.853	2.69537	4.15475	26.7464	32.2171	262.573	7.92421	2168.34	1946.62	533.1	2.61418	3.96821	22.7676	32.8544		7.98952	2184.9	1954.68	448.054	2.61308	4.00718	27.038	28.3426		7.56623	1929.73	1868.98	1242.48	1.071	1.64459
1926	2020	9	19	18	261.75	2020.72	20.9519	32.7574	265.419	8.03832	2189.94	1949.28	393.731	2.69064	4.14755	26.742	32.2278	262.151	7.92545	2168.81	1946.41	531.356	2.62089	3.97834	22.8048	32.7636		7.97953	2179.63	1955.01	459.655	2.55835	3.92368	26.9836	28.8016		7.56866	1952.62	1889.38	1244.56	1.0969	1.68174
1927	2020	9	19	19	261.792	2020.72	20.9661	32.7829	266.073	8.04052	2191.52	1949.34	391.55	2.70595	4.17074	26.7469	32.219	261.682	7.9297	2168.42	1943.99	525.175	2.64152	4.00969	22.7676	32.7884		7.97355	2181.07	1959.38	467.429	2.52899	3.87883	27.0002	25.3988		7.57209	1782.89	1732.93	1162.94	0.939638	1.46127
1928	2020	9	19	20	261.833	2020.72	21.0312	32.8785	262.652	8.03772	2197.45	1955.11	395.314	2.70907	4.17391	26.7541	32.2299	259.938	7.93095	2168.91	1943.7	523.449	2.64939	4.02143	22.6748	32.8516		7.97456	2184.74	1962.57	466.703	2.53221	3.8842	26.8372	24.8422		7.57852	1755.13	1706.3	1132.59	0.919922	1.43511
1929	2020	9	19	21	261.875	2020.72	21.0259	32.8822	263.421	8.04292	2197.68	1952.68	389.724	2.73524	4.21426	26.7699	32.2399	259.414	7.9342	2169.35	1942.33	518.875	2.66796	4.04931	22.592	32.8976		7.97558	2187.4	1964.87	465.828	2.53451	3.88822	26.788	25.19		7.57095	1772.48	1724.35	1161.07	0.919628	1.43246
1930	2020	9	19	22	261.917	2020.72	21.0195	32.9136	258.99	8.03713	2199.63	1957.28	396.245	2.70905	4.17369	26.7709	32.2485	258.651	7.93645	2169.74	1941.51	515.743	2.6801	4.06763	22.5284	32.8972		7.97459	2187.38	1965.79	467.085	2.52414	3.87301	26.7132	25.866		7.58737	1806.2	1751.3	1127.81	0.98218	1.52542
1931	2020	9	19	23	261.958	2020.72	21.0524	32.9051	257.103	8.03933	2199.1	1955.47	393.775	2.72222	4.19369	26.7615	32.2482	258.371	7.9527	2169.72	1933.44	493.262	2.7615	4.1913	22.3424	32.758		7.93461	2179.31	1979.29	519.028	2.31053	3.54822	26.687	24.4074		7.5818	1733.44	1686.01	1114.06	0.900335	1.40818
1932	2020	9	20	0	262	2020.72	21.0185	32.8829	253.315	8.03453	2197.73	1957.05	398.838	2.6924	4.14833	26.7393	32.2589	258.604	7.95895	2170.2	1930.81	484.923	2.79253	4.23857	22.2748	32.6758		7.92962	2174.54	1978.03	525.188	2.27517	3.49523	26.6132	25.7642		7.58023	1801.12	1748.87	1145.58	0.958695	1.49007
1933	2020	9	20	1	262.042	2020.72	21.0301	32.9215	255.72	8.03773	2200.12	1957.29	395.644	2.71401	4.18113	26.7019	32.2649	259.097	7.9622	2170.47	1929.64	480.654	2.80628	4.25988	22.4	32.7982		7.92864	2181.64	1983.59	527.818	2.2927	3.51994	26.5514	25.0504		7.59166	1765.51	1713.44	1099.24	0.945134	1.47419
1934	2020	9	20	2	262.083	2020.72	21.0188	32.9136	252.623	8.03393	2199.63	1958.91	399.738	2.69298	4.14894	26.6579	32.2652	260.012	7.96345	2170.48	1929.34	479.029	2.8085	4.26382	22.434	32.7958		7.93565	2181.5	1980.02	517.951	2.32638	3.57133	26.5352	26.8804		7.59409	1856.79	1796.37	1128.34	1.03949	1.60807
1935	2020	9	20	3	262.125	2020.72	21.0709	32.9425	255.037	8.04014	2201.42	1956.81	393.188	2.7324	4.20881	26.6184	32.2592	260.201	7.9637	2170.21	1929.31	478.69	2.80535	4.25963	22.5436	32.7688		7.94167	2179.94	1975.17	509.384	2.35984	3.62182	26.4674	24.8174		7.59952	1753.89	1701.06	1073.2	0.946421	1.47822
1936	2020	9	20	4	262.167	2020.72	21.082	32.9723	255.219	8.03734	2203.27	1959.66	396.461	2.72277	4.19357	26.5579	32.2643	261.346	7.96395	2170.44	1929.81	478.423	2.80124	4.25413	22.6328	32.8612		7.96268	2185.29	1969.07	482.098	2.47333	3.79426	26.4018	26.1224		7.60295	1818.99	1759.93	1088.71	1.01531	1.57649
1937	2020	9	20	5	262.208	2020.72	21.1432	33.0135	260.159	8.04254	2205.83	1958.6	391.125	2.75973	4.2494	26.492	32.2605	261.873	7.9642	2170.27	1930.05	478.112	2.79575	4.2467	22.5808	32.8708		7.9587	2185.85	1971.81	487.423	2.4512	3.76077	26.417	28.1526		7.59838	1920.25	1853.41	1140.74	1.10859	1.70673
1938	2020	9	20	6	262.25	2020.72	21.1889	33.0228	262.242	8.04174	2206.4	1959.12	392.043	2.76107	4.25086	26.438	32.2662	262.633	7.96445	2170.52	1930.53	477.844	2.79234	4.24216	22.5316	32.9506		7.96671	2190.48	1972.13	477.663	2.4926	3.82411	26.304	29.5408		7.60381	1989.5	1915.05	1151.96	1.18853	1.82118
1939	2020	9	20	7	262.292	2020.72	21.2103	33.0242	262.302	8.04194	2206.49	1958.92	391.829	2.76429	4.25557	26.3981	32.265	263.409	7.9647	2170.47	1930.66	477.533	2.78964	4.23859	22.4972	32.795		7.93873	2181.45	1978.13	513.683	2.3453	3.59975	26.231	30.6496		7.60423	2044.8	1965.23	1172.33	1.2445	1.90051
1940	2020	9	20	8	262.333	2020.72	21.2162	33.0424	260.618	8.04215	2207.62	1959.69	391.75	2.76802	4.26107	26.3779	32.2662	261.984	7.96294	2170.52	1931.75	479.858	2.77877	4.22233	21.6912	32.38		7.91974	2157.39	1971.86	536.066	2.15888	3.32424	26.2058	30.7384		7.60266	2049.23	1969.84	1178.67	1.24388	1.89919
1941	2020	9	20	9	262.375	2020.72	21.2208	33.0537	260.628	8.04135	2208.32	1960.64	392.701	2.7657	4.25735	26.3579	32.2689	261.683	7.96219	2170.64	1932.37	480.877	2.77324	4.21415	21.77	32.469		7.91776	2162.55	1976.58	539.854	2.16485	3.332	26.2068	30.8184		7.59909	2053.22	1974.59	1190.91	1.23886	1.89105
1942	2020	9	20	10	262.417	2020.72	21.1969	33.0909	259.35	8.03855	2210.63	1964.15	396.043	2.75352	4.23852	26.3339	32.2652	261.86	7.96144	2170.48	1932.8	481.864	2.76672	4.20459	22.2072	32.7844		7.92277	2180.84	1986.88	536.003	2.25012	3.45653	26.1958	30.8552		7.58952	2055.06	1979.35	1220.62	1.21565	1.85548
1943	2020	9	20	11	262.458	2020.72	21.1541	33.0673	255.749	8.03375	2209.16	1965.75	401.133	2.72242	4.19134	26.3317	32.2695	261.891	7.96069	2170.67	1933.35	482.885	2.76307	4.19902	21.976	32.5556		7.93979	2167.57	1969.58	509.859	2.28398	3.51265	26.5076	31.0076		7.58795	2062.66	1985.4	1229.65	1.23429	1.88129
1944	2020	9	20	12	262.5	2020.72	21.1719	33.0976	255.712	8.03795	2211.04	1964.99	396.756	2.74891	4.23164	26.361	32.2678	262.694	7.95894	2170.59	1933.95	485.191	2.75676	4.18908	22.0416	32.6302		7.9398	2171.9	1972.75	510.568	2.29657	3.53076	26.3488	30.8246		7.58738	2053.53	1977.99	1227.07	1.21584	1.85509
1945	2020	9	20	13	262.542	2020.72	21.1795	33.0895	258.439	8.04116	2210.54	1962.87	393.203	2.76501	4.25641	26.4039	32.2675	262.223	7.95719	2170.58	1934.51	487.507	2.75191	4.18116	22.23	32.7592		7.94582	2179.38	1974.94	503.62	2.35143	3.61214	26.4308	30.844		7.58481	2054.5	1979.34	1235.7	1.21416	1.85195
1946	2020	9	20	14	262.583	2020.72	21.1748	33.1018	256.88	8.03736	2211.3	1965.49	397.44	2.74664	4.22808	26.4047	32.2687	263.209	7.95944	2170.63	1933.41	484.508	2.76361	4.19891	22.2238	32.7498		7.98183	2178.83	1957.45	456.775	2.51637	3.86565	26.324	30.8726		7.58824	2055.93	1980	1225.35	1.21933	1.86027
1947	2020	9	20	15	262.625	2020.72	21.1728	33.1089	257.794	8.03656	2211.75	1966.27	398.371	2.74323	4.22278	26.4359	32.2644	263.917	7.92369	2170.44	1950.75	534.259	2.58743	3.93091	22.2432	32.7126		7.95685	2176.68	1967.45	488.434	2.39793	3.68383	26.5548	30.8518		7.58566	2054.89	1978.89	1233.62	1.22262	1.8641
1948	2020	9	20	16	262.667	2020.72	21.1778	33.1199	256.412	8.03476	2212.43	1967.72	400.434	2.73585	4.21126	26.4641	32.2669	264.211	7.92894	2170.55	1948.08	526.679	2.61594	3.97384	22.2372	32.6958		7.97286	2175.7	1959.1	467.569	2.46971	3.79432	26.4358	30.7238		7.59409	2048.5	1970.94	1204.78	1.23197	1.87978
1949	2020	9	20	17	262.708	2020.72	21.2092	33.1661	258.333	8.03996	2215.29	1967.12	395.091	2.77071	4.26412	26.5227	32.2566	264.795	7.93619	2170.1	1943.73	516.273	2.65627	4.03448	22.309	32.744		7.97088	2178.5	1961.84	470.509	2.4716	3.79604	26.4558	30.7116		7.59852	2047.89	1968.89	1191.26	1.24376	1.89772
1950	2020	9	20	18	262.75	2020.72	21.2417	33.1777	262.978	8.04717	2216.01	1963.7	387.391	2.81226	4.32759	26.5664	32.2589	264.155	7.94144	2170.2	1940.9	508.907	2.6868	4.08028	22.3458	32.819		7.96489	2182.85	1968.03	478.87	2.45451	3.76875	26.3548	29.409		7.59095	1982.92	1912.8	1187.2	1.15247	1.76646
1951	2020	9	20	19	262.792	2020.72	21.2751	33.1536	265.668	8.05337	2214.52	1958.97	380.606	2.84486	4.37759	26.6	32.2587	264.351	7.94669	2170.19	1938.03	501.622	2.71641	4.12481	22.3156	32.7552		7.95691	2179.15	1968.97	488.745	2.4086	3.69911	26.267	25.6042		7.60038	1793.14	1737.46	1085.27	0.978856	1.52407
1952	2020	9	20	20	262.833	2020.72	21.3029	33.1193	265.172	8.05157	2212.39	1957.97	382.234	2.83407	4.36099	26.6147	32.2539	263.168	7.94994	2169.98	1936.12	497.134	2.73384	4.15114	22.361	32.8754		7.96492	2186.12	1970.61	479.334	2.46169	3.77913	26.334	23.4276		7.59681	1684.57	1638.47	1053.11	0.870185	1.36925
1953	2020	9	20	21	262.875	2020.72	21.2789	33.106	262.965	8.05077	2211.57	1957.91	382.987	2.82601	4.349	26.6096	32.2584	261.263	7.95218	2170.18	1935.18	494.101	2.74523	4.16846	22.2952	32.774		7.96194	2180.24	1967.64	482.314	2.4319	3.73494	26.2486	25.569		7.60224	1791.38	1735.43	1079.52	0.980255	1.52658
1954	2020	9	20	22	262.917	2020.72	21.2709	33.1148	261.658	8.04897	2212.11	1959.36	384.968	2.81696	4.33507	26.5819	32.2563	260.816	7.95843	2170.08	1932.16	485.686	2.77436	4.21307	22.3606	33.0524		7.98295	2196.38	1970.32	457.92	2.56548	3.9369	26.2008	24.1954		7.59967	1722.87	1673.43	1059.91	0.9069	1.42195
1955	2020	9	20	23	262.958	2020.72	21.3059	33.1322	263.736	8.05018	2213.19	1959.33	383.809	2.82864	4.35248	26.5569	32.2582	260.443	7.96268	2170.17	1930.26	480.06	2.79402	4.24324	22.3404	32.8942		7.95197	2187.21	1977.81	496.599	2.40193	3.68744	26.118	24.9074		7.60209	1758.38	1705.69	1066.81	0.942681	1.47322
1956	2020	9	21	0	263	2020.72	21.3179	33.154	265.557	8.05238	2214.54	1959.17	381.636	2.84389	4.37559	26.5219	32.255	259.627	7.96493	2170.02	1929.26	477.095	2.80194	4.25577	22.2914	32.7314		7.93398	2177.77	1978.64	519.632	2.30102	3.53433	26.1114	27.4256		7.60652	1883.99	1819.25	1102.8	1.077	1.66439
1957	2020	9	21	1	263.042	2020.72	21.2919	33.1434	262.725	8.04958	2213.89	1960.31	384.533	2.82553	4.34775	26.4799	32.2541	260.452	7.96418	2169.98	1929.93	478.103	2.79388	4.24408	22.3618	33.0098		7.963	2193.91	1977.97	483.049	2.4664	3.7852	26.0788	26.2062		7.60395	1823.17	1764.63	1086.46	1.00862	1.56699
1958	2020	9	21	2	263.083	2020.72	21.2731	33.1652	261.349	8.05078	2215.24	1960.93	383.43	2.83257	4.35859	26.4377	32.2599	261.005	7.96543	2170.24	1929.81	476.515	2.7968	4.249	22.3928	32.8216		7.95101	2183	1974.4	497.203	2.39479	3.67656	25.922	24.305		7.61838	1728.33	1674.7	1012.77	0.938427	1.47174
1959	2020	9	21	3	263.125	2020.72	21.2849	33.1584	261.597	8.05098	2214.82	1960.38	383.159	2.83395	4.36064	26.39	32.2579	261.985	7.96468	2170.15	1930.49	477.517	2.78809	4.23642	22.3514	33.0396		7.97503	2195.64	1973.66	467.795	2.52534	3.8755	25.961	24.7706		7.61981	1751.56	1695.45	1017.77	0.965745	1.51095
1960	2020	9	21	4	263.167	2020.72	21.2969	33.1405	262.796	8.04819	2213.71	1960.86	385.994	2.81843	4.3368	26.3558	32.2612	262.773	7.96393	2170.3	1931.24	478.542	2.78123	4.2264	22.287	32.7308		7.94304	2177.73	1974.46	507.127	2.34093	3.59568	25.924	25.0364		7.62524	1764.82	1706.28	1008.73	0.988799	1.5452
1961	2020	9	21	5	263.208	2020.72	21.3304	33.1444	263.122	8.05239	2213.95	1958.58	381.549	2.844	4.3757	26.3139	32.2627	262.934	7.96318	2170.37	1931.99	479.564	2.77346	4.21512	22.3526	32.9132		7.96206	2188.31	1973.86	483.409	2.45145	3.76317	25.884	30.7602		7.63067	2050.32	1963.19	1097.83	1.30357	1.99212
1962	2020	9	21	6	263.25	2020.72	21.3347	33.1395	256.657	8.05059	2213.64	1959.25	383.413	2.83445	4.36101	26.2878	32.2607	262.875	7.96143	2170.28	1933	481.882	2.76177	4.19772	22.3818	32.8254		7.95507	2183.22	1972.75	491.818	2.41283	3.70433	25.6594	29.0984		7.6371	1967.43	1887.59	1049.67	1.21841	1.87345
1963	2020	9	21	7	263.292	2020.72	21.3359	33.1653	260.105	8.04979	2215.24	1960.95	384.457	2.83349	4.35928	26.2728	32.2651	263.586	7.96068	2170.47	1933.64	482.911	2.75691	4.19047	22.2774	32.8722		7.96409	2185.93	1971.45	480.397	2.45026	3.76248	25.6096	30.643		7.63452	2044.47	1957.9	1084.29	1.2938	1.97953
1964	2020	9	21	8	263.333	2020.72	21.3328	33.175	257.334	8.04499	2215.85	1963.98	389.668	2.80944	4.32222	26.2628	32.2522	264.846	7.96193	2169.9	1932.64	481.189	2.76111	4.19712	22.291	32.9572		7.9701	2190.86	1972.54	473.377	2.48823	3.8199	25.7578	30.7378		7.63395	2049.2	1961.68	1088	1.3049	1.99505
1965	2020	9	21	9	263.375	2020.72	21.3176	33.2022	249.911	8.0462	2217.53	1964.84	388.592	2.81743	4.33443	26.2491	32.2567	265.218	7.96418	2170.1	1931.76	478.251	2.77175	4.21343	22.2726	33.0338		7.98612	2195.3	1968.52	453.849	2.57093	3.94638	25.8108	30.7702		7.63338	2050.82	1963.08	1090.31	1.30781	1.99897
1966	2020	9	21	10	263.417	2020.72	21.3155	33.2168	258.897	8.0484	2218.44	1964.44	386.346	2.83041	4.35428	26.244	32.2631	265.681	7.96643	2170.39	1930.88	475.336	2.78344	4.23119	22.1706	33.0562		8.01713	2196.6	1954.8	417.096	2.71706	4.17166	25.8334	30.874		7.63481	2056	1967.16	1088.34	1.31859	2.01469
1967	2020	9	21	11	263.458	2020.72	21.3239	33.2204	260.869	8.0486	2218.66	1964.44	386.154	2.8327	4.35768	26.275	32.263	264.576	7.96567	2170.38	1931.02	476.302	2.78257	4.22946	22.1076	32.9118		8.01215	2188.23	1951.01	421.753	2.6704	4.10207	26.0174	30.8582		7.63524	2055.21	1965.49	1087.37	1.32827	2.02845
1968	2020	9	21	12	263.5	2020.72	21.3449	33.2106	260.413	8.0468	2218.05	1964.73	387.995	2.82421	4.34446	26.2891	32.2701	264.346	7.96492	2170.7	1931.54	477.319	2.78075	4.22644	22.16	32.8756		7.99716	2186.13	1956.39	439.113	2.59759	3.98998	26.2546	30.942		7.62567	2059.39	1971.32	1116.22	1.3187	2.01189
1969	2020	9	21	13	263.542	2020.72	21.3518	33.2225	261.114	8.052	2218.79	1962.53	382.538	2.85343	4.38922	26.325	32.2696	264.669	7.97017	2170.67	1928.58	470.44	2.81132	4.27244	22.1584	32.8428		8.00618	2184.23	1950.37	428.157	2.63804	4.05242	26.302	30.9374		7.6261	2059.16	1970.76	1115.06	1.32203	2.01671
1970	2020	9	21	14	263.583	2020.72	21.3953	33.2291	263.747	8.05221	2219.2	1962.41	382.355	2.85951	4.39799	26.392	32.2791	264.578	7.97442	2171.1	1926.21	464.963	2.84096	4.31648	22.1532	32.8112		8.03419	2182.39	1934.71	396.173	2.77461	4.26259	26.2606	30.9644		7.63153	2060.5	1970.37	1100.24	1.3364	2.03872
1971	2020	9	21	15	263.625	2020.72	21.4159	33.2129	266.273	8.05741	2218.2	1958.67	376.749	2.88696	4.44011	26.4649	32.285	265.407	7.97967	2171.36	1923.14	458.246	2.87634	4.3692	22.2722	32.7476		8.02421	2178.71	1935.94	406.721	2.72796	4.19017	26.285	30.9702		7.62895	2060.79	1971.37	1107.59	1.33086	2.03008
1972	2020	9	21	16	263.667	2020.72	21.3942	33.2191	262.995	8.04761	2218.58	1964.34	387.175	2.83418	4.35914	26.513	32.2892	265.103	7.98592	2171.55	1919.66	450.365	2.91474	4.42682	22.3456	32.8166		8.02422	2182.71	1938.6	407.188	2.74268	4.21125	26.3346	30.8626		7.63038	2055.43	1965.86	1101.74	1.33135	2.03118
1973	2020	9	21	17	263.708	2020.72	21.3916	33.2268	263.671	8.05181	2219.06	1962.53	382.757	2.85681	4.3939	26.579	32.298	263.976	7.99117	2171.94	1916.69	443.844	2.95041	4.47999	22.363	32.8654		8.01224	2185.54	1946.85	421.211	2.68941	4.12879	26.3994	30.9026		7.63081	2057.42	1967.22	1101.46	1.33811	2.04084
1974	2020	9	21	18	263.75	2020.72	21.4196	33.2442	263.963	8.05701	2220.14	1960.42	377.394	2.88903	4.44295	26.6017	32.2924	263.163	7.99542	2171.69	1914.07	438.583	2.9751	4.51722	22.4516	32.8324		8.00225	2183.62	1949.65	432.62	2.64441	4.05901	26.352	28.564		7.63424	1940.77	1861.6	1049.67	1.2147	1.86754
1975	2020	9	21	19	263.792	2020.72	21.4217	33.2302	265.419	8.05822	2219.27	1959.06	376.031	2.89389	4.45055	26.611	32.296	262.855	7.99767	2171.85	1912.93	435.854	2.98862	4.53758	22.3654	32.794		7.99627	2181.4	1951.45	439.477	2.60308	3.99688	26.3048	24.7966		7.63467	1752.85	1691.61	982.258	1.01165	1.581
1976	2020	9	21	20	263.833	2020.72	21.4131	33.1751	262.601	8.05442	2215.85	1958.39	379.605	2.86636	4.40883	26.6007	32.2971	262.163	7.99992	2171.9	1911.85	433.142	2.99991	4.55486	22.3308	32.8498		7.99528	2184.63	1954.84	441.123	2.60112	3.99375	26.2016	23.7668		7.6391	1701.49	1644.06	953.409	0.963886	1.51459
1977	2020	9	21	21	263.875	2020.72	21.4571	33.116	263.966	8.05362	2212.19	1955.5	379.981	2.85933	4.39807	26.57	32.2936	261.93	8.00217	2171.74	1910.78	430.439	3.00866	4.56862	22.2568	32.8928		7.9883	2187.12	1960.87	449.988	2.56519	3.939	26.114	25.5188		7.64053	1788.88	1723.46	979.786	1.0543	1.64292
1978	2020	9	21	22	263.917	2020.72	21.5179	33.1095	263.513	8.05082	2211.78	1956.16	382.864	2.84981	4.38277	26.5407	32.299	261.051	8.00342	2171.98	1910.53	428.988	3.01302	4.57559	22.1322	32.9182		7.98031	2188.6	1966.89	460.117	2.51858	3.86854	26.023	24.6604		7.64096	1746.06	1684.78	963.745	1.00658	1.57541
1979	2020	9	21	23	263.958	2020.72	21.5001	33.1236	263.758	8.05402	2212.66	1955.32	379.595	2.86656	4.4086	26.4915	32.2971	261.796	8.00567	2171.9	1909.65	426.332	3.02005	4.58698	22.0876	33.0116		7.97833	2194.01	1972.63	463.416	2.51489	3.86252	25.92	25.8806		7.63838	1806.92	1741.11	990.727	1.06047	1.65071
1980	2020	9	22	0	264	2020.72	21.441	33.1013	260.645	8.04923	2211.27	1957.2	384.529	2.83305	4.35797	26.4259	32.3004	262.873	8.00592	2172.04	1910.15	426.099	3.01499	4.58017	22.0506	33.0386		7.96934	2195.58	1978.53	475.097	2.47205	3.79689	25.9026	25.0688		7.64181	1766.43	1703.5	968.296	1.02475	1.60124
1981	2020	9	22	1	264.042	2020.72	21.421	33.1007	262.564	8.05143	2211.24	1956.17	382.196	2.84252	4.37278	26.37	32.3005	262.345	8.00516	2172.05	1911	427.034	3.00514	4.566	21.9364	33.0376		7.97436	2195.52	1976.89	468.682	2.48557	3.81885	25.873	25.826		7.64924	1804.2	1735.86	963.071	1.07996	1.6817
1982	2020	9	22	2	264.083	2020.72	21.4259	33.0926	263.138	8.05263	2210.73	1955.09	380.863	2.8483	4.38169	26.3079	32.2982	262.932	8.00341	2171.95	1912.35	429.159	2.989	4.54237	21.9298	33.0478		7.97037	2196.11	1979.34	473.864	2.46734	3.79083	25.8076	25.897		7.65667	1807.74	1737.27	946.264	1.09792	1.70944
1983	2020	9	22	3	264.125	2020.72	21.4901	33.0613	265.972	8.05583	2208.79	1951.32	377.235	2.86754	4.41084	26.2625	32.3001	263.674	7.99966	2172.03	1914.76	433.708	2.96425	4.50536	21.8728	33.0258		7.96439	2194.84	1981.56	481.409	2.43239	3.73789	25.7466	25.8644		7.6591	1806.12	1735.36	939.804	1.09908	1.7118
1984	2020	9	22	4	264.167	2020.72	21.498	33.0325	261.212	8.05403	2207.01	1950.77	378.901	2.8554	4.39235	26.2124	32.2948	264.406	7.99591	2171.8	1916.95	438.266	2.93845	4.4669	21.7576	33.0244		7.9684	2194.75	1980.39	476.201	2.44097	3.75227	25.6398	25.067		7.66153	1766.34	1699.14	920.855	1.05686	1.65267
1985	2020	9	22	5	264.208	2020.72	21.4861	33.0317	260.843	8.05224	2206.96	1951.77	380.793	2.84475	4.37611	26.1729	32.2958	264.94	7.99016	2171.84	1920.31	445.353	2.90387	4.41485	21.7234	33.06		7.98742	2196.82	1973.16	452.56	2.53106	3.89082	25.6624	25.4498		7.66296	1785.44	1715.94	923.804	1.0817	1.68835
1986	2020	9	22	6	264.25	2020.72	21.4854	33.0435	258.984	8.04944	2207.69	1953.83	383.845	2.83152	4.35565	26.135	32.2966	266.076	7.98541	2171.88	1923.1	451.284	2.87501	4.37147	21.715	33.0682		8.00143	2197.29	1966.71	435.663	2.59872	3.99484	25.5818	30.7974		7.66339	2052.17	1955.43	1010.43	1.3811	2.11227
1987	2020	9	22	7	264.292	2020.72	21.49	33.0744	259.43	8.05064	2209.61	1954.72	382.802	2.84194	4.37132	26.1179	32.2938	265.815	7.94866	2171.75	1941.81	499.342	2.68405	4.08136	21.4006	32.8394		7.98845	2184.03	1964.48	449.486	2.48486	3.82504	25.3836	30.6822		7.67281	2046.43	1948.08	984.165	1.39082	2.12915
[truncated: 10,997 more rows]
[truncated: 2 more columns]
